# Supplementary material for: Pervasive Chimerism in the Replication-Associated Proteins of Uncultured Single-Stranded DNA Viruses
Source: MDPI journal article supplement (doi:10.3390/v10040187), 2018-04-10
Supplement: s1 [file s1]

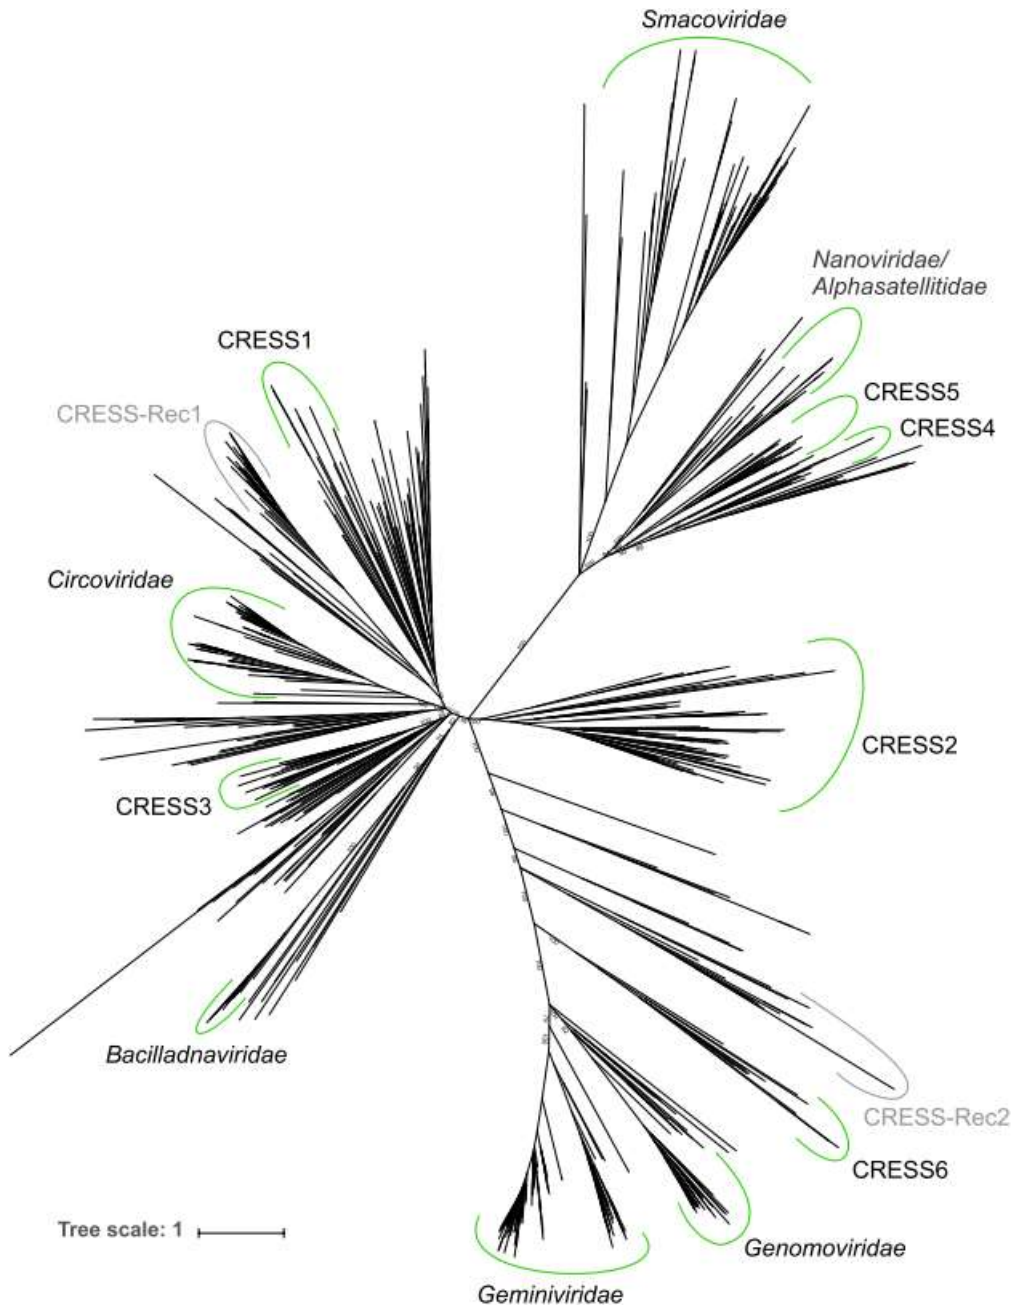

**Figure S1.** Phylogenetic tree of all CRESS DNA viruses based on full-length Rep amino acid sequences. Clades containing classified CRESS DNA virus groups and those identified in this study are marked. Branches with support lower than 70% were collapsed. The phylogeny was inferred using PhyML [32] with the rtREV+G+F substitution model using the alignment containing 473 positions.
