# Supplementary material for: Pervasive Chimerism in the Replication-Associated Proteins of Uncultured Single-Stranded DNA Viruses
Source: Viruses. 2018 Apr 10;10(4):187. doi: 10.3390/v10040187 (PMC5923481; doi:10.3390/v10040187)
Supplement: Supplementary file 1 [file viruses-10-00187-s001.zip › Supplementary file 1.xlsx]

## Sheet: Sheet1
Genome/protein accession	Virus	ORF/protein sequence	Group	Recombination status and sources (endonulcease|helicase)	Domain “conectedness” score
HM236368	Rhynchosia golden mosaic Havana virus-[Cuba:Havana:28:2007]	MPLQRRFRLNAKNFFLTYPKCSISKEEALGQLLSIPTPVNKKFIKICKELHENGEPHLHVLIQFEGKYQCTNNRFFDLVSTTRSAHFHPNIQGAKSSSDVKSYIDKDGDTLQWGEFQIDGRSARGGQQTANDSYAKALNAESAEQALQIIKEHQPQHFVLQYHNLVSNITKIFHKPPEPWVPPFQLSTFNNVPAIMSEWVNVNISDAAARPLRPISIIVEGPSRTGKTIWARSMGPHNYLCGHIDLNPKIYSNDAWYNVIDDVDPHYLKHFKEFMGAQRDWQSNCKYGKPIQIKGGIPTIFLCNPGPHSSYKEFLGEEKNTSLHDWAKKNAIFVSIEEPLFTTTNQTAAQIREKTSETKKD	Geminiviridae	-	0.26
AF449192	Macroptilium mosaic Puerto Rico virus-[Bean]	MPPPKRFRVSSKNYFLTYPRCSISKEETLSQLLNIETPTNKKYIKICEELHEDGQPHLHVLIQFEGKFVCTNQRLFDLVSPTRSTHFHPNIQGVKSSSDVKAYIDKDGVTIEWGQFQIDGRSARGGQQSANDSYAKALNADCIDAAMTVLKEEQPKDFVVQYHNIRSNLEKIFTPPTEPWVPPFQLSTFNNVPLIMSDWVNENISDSAARPLRPISIIVEGPSRTGKTIWARSLGPHNYLCGHIDLNPRIYSNHSWYNVIDDVDPHYLKHFKEFMGAQRDWQSNCKYGKPIQIKGGIPTIFLCNPGPHSSYKEYLSEEKNKSLNDWAQKNAIYVSITEPLYSTVNQTASSSRQETDST	Geminiviridae	-	0.39
AF029217	Cowpea golden mosaic virus-[Nigeria]	MPRSGAFRVNAKNIFATYPRCSLPKEEALELLRQIPTAVNKKFIKVARELHEDGEPHLHVLLQFEGKLQITNPRLFDLVSGNRSAVFHPNIQGAKSSSDVKSYIEKDGDTISWGEFQIDGRSSRGGQQSANDAYAAAINSGSPTKALNIVKELAPKDFVLHYHNIKSNLDRIFSKPLEPYSCPFRLNSFNNVPQIMKDWASINVVDAAARPDRPISIVIEGESRTGKTMWARSLGAHNYLCGHLDLSPKVYSNNAWYNVIDDVDPHYLKHFKEFMGAQHDWQSNTKYGKPIQIKGGIPTIFLCNPGPNSSYKSFLDEDKNKDLKQWALKNAIFVDISFPLYSNSNKSQTQNS	Geminiviridae	-	0.48
KC508642	Soybean chlorotic blotch virus	MPRSGAFRVHAKNIFLTYPRCSLSKDEALELLLGVTTPVNKKFIKVARELHEDGQPHLHVLLQFEGKLQITNPRLFDLVSRTSAHVFHPNVQGAKSSSDVKSYIDKDGDTVSWGEFQIDARSSRGGKQSANDAYAAAINTGSPTKALQLLKEQAPKDYVLQFHNIKGNLERIFMKVSTPWTCPYDPRSFNNVPDVMLDWVSVNVKDPAARPNRPISIVVEGDSRTGKTMWARSLGVHNYLCGHLDLSPKVYSNNAWYNVIDDVDPHYLKHFKEFMGAQHDWQSNTKYGKPIQIKGGIPTIFLCNPGPSSSYKSYLDEERNSSLKQWALKNAIFVSIAFPLYTSPDQSQTSTSEKEANPTTPC	Geminiviridae	-	0.48
DQ641688	Corchorus golden mosaic virus	MSGRFKKQGVSFFLTWPKCPVTKESALDQIQALTLPTNIVYIRVCEEKHQDGSPHLHALVQFQKKFICTNCRLFDLSHPQNSRQFHCHIETARSSSDAKSYIEKDGVFCEWGTFQVDGRSARGGQQTVNEAYAKALNSGSKDEALNIIKELVPKDYVLQFHNLNQNLERIFAPPVNVFEPPFPLSSFNNVPAVINQWVNDNIMDAAARPFRPISIIIEGPSRTGKTLWARSLGRHNYLCGHLDLSPKVYSNEAWYNVIDDVDPHYLKHMKEFMGAQRDWQSNCKYGKPIQINGGIPTIFLCNPGPTSSYKEFFEEEKNKAINDWAKKNVIYVTIEEPFFNTTNQESTSALEESNSSETN	Geminiviridae	-	0.55
KX101212	Corchorus yellow vein virus - [Hoa Binh]	MGSRFVKTASSFFLTWPRCPINKESALEQIKTLSLPTNIVYIRVCEEKHQDGSPHLHALVQFQKKYRCTNCRLFDLSNPNSSQQYHCNIQTARSSSDAKSYIEKDGVFCEWGEFKIDGRSSRGGQQSANDAYAKALNSGGKDEALTIIKELLPKDYVLQYHNLNANLERIFAPPTTVYMPPFQTTTFNNVPEALTDWVTTNVADSAARPFRPISIIIEGPSRTGKTLWARSLGPHNYLCGHLDLSPKVYSNNAWYNVIDDVDPHFLKHMKEFMGAQRDWQSNCKYGKPIQIKGGIPTIFLCNPGPQSSYKEFFEEEKNKAINDWAKKNSIYITITEPLYSTVDQASTSSRQESGSSETY	Geminiviridae	-	0.58
DQ644561	Merremia leaf curl virus	MGHQRHQFRRGLRDTNMPRQPSFRVSAKNVFLTYPKCSLSKETALELLKIVNCPSDKVFIRVSQEKHQDGSLHLHALIQFKGKAQFKNPRHFDLQHPNSSTQFHPNFQGAKSSSDVKSYIEKDGDYIDWGTFQVDGRSARGGQQTANDAAAEALNAGSAEAALQIIREKLPRDFIFQYHNLRSNLDRIFSPPPSVYSSPFLSSSFNAVPDIISDWAAENVMDSAARPDRPISIVIEGPSRIGKTVWARSLGPHNYLCGHLDLSPKVYSNSAWYNVIDDVNPQYLKHFKEFMGAQKDWQSNCKYGKPVQIKGGIPTIFLCNPGEGSSFKLWLDKPEQGALKNWATANAIFCDVQSPFWVQEEVSGAGAITRSSEEGQEESS	Geminiviridae	-	0.61
FJ969831	Sweet potato mosaic virus - [Brazil:Brasilia1:2007]	MAPPKRFKIQAKNYFLTYPHCSLSKEEVLDQLKKIQTPVNKKYIHIARELHEDGQPHIHVLLQFEGKFVCTNQRLFDLVSPTRSAHFHPNIQGAKSSSDVKSYVDKDGDTLTWGEFQIDGRSARGGQQTANDAAAEALNSGSKEAALQIIREKLPEKFIFQYHNLCSNLDRIFSPPPSVYSSPFSLSSFNNVPDIISDWAAENVMDSAARPDRPISIVIEGPSRIGKTVWARSLGPHNYLCGHLDLSPKVYSNSAWYDVIDDVNPQYLKHFKEFMGAQKDWQSNCKYGKPVQIKGGIPTIFLCNPGEGSSFKLWLDKPEQEALKNWAVKNAIFCDVDSPFWIQEEVSTSGANTRSGQEEAEEDS	Geminiviridae	-	0.39
AM491778	Tomato leaf curl Seychelles virus	MRHQRHQFRRVLKDTNMPRQPGFRVSAKNIFLTYPKCSLSKEIALELLKAIKCPSDKLFIRVSQEKHQDGSLHLHALIQFKGKAQFKNPRHFDLQHPTSSSQFHPNFQGAKSSSDVKSYIEKDGDYIDWGTFQVDGRSARGGQQTANDAAADALNAGSKDAALQIIREKLPEKFIFQYHNLVSNLDRIFQEPPAPYISPFLCSSFNQVPEELEVWAAENVMGAAARPWRPISIVIEGDSRTGKTMWARSLGPHNYLCGHLDLSPKVYSNDAWYNVIDDVDPHYLKHFKEFMGAQRDWQSNTKYGKPIQIKGGIPTIFLCNPGPTSSYKEYLDEEKNTPLKDWAFKNATFITLHEPLFTSTNQGPTPHSENESSQT	Geminiviridae	-	0.55
EU798996	Jatropha leaf curl virus	MPRVNAFSVSAKNIFLTYPKCPLSKETVLDLLRNISCPSDKLFIRVAQEKHEDGSLHIHALIQFKGKARFRNARHFDLIHPHSSSQFHPNIQGAKSSSDVKSYIEKDGDFIDWGFFQIDGRSARGGQQTANDAAAEALNSGSAEAALAISVKMPRDYIFQYHNLKSNLEREIFTPLRVDYVSPYPLCSFDRVPEELEIWASENIVSPAARPFRPISIVLEGDSRIGKTMWARSLGPHNYLCGHLDLSPRVYSNDVWYNVIDDVDPHYLKHFKEFMGAQRDWQSNTKYGKPVQVKGGIPTIFLCNPGPHSSYKEYLDEDRNAALKNWAVKNVVFDSDSPPPAPFKRRQRRQIRGG	Geminiviridae	-	0.61
EU547682	Tomato leaf curl Palampur virus-[Roodan:tomato]	MAPPTRFRINAKNYFLTYPKCSLTKEEALSQLQNLETPTSKKFIKICRELHEDGSPHIHVLIQFEGKFQCKNNRFFDLVAPSRSAHFHPNIQGAKSASDVKTYIDKDGDVLEWGVFQIDGRSARGGQQTANDAYAQAINTGNKEDALKVLKELAPKDYVLQFHNLMTNLDRIFPSRIEVYRSPFNVSSFDRVPPELVDWVSSNLRCSAARPFSAALPIRPIGLVLEGDSRTGKTMWARSLGPHNYLCGHLDLNPRVYSNDALYNVIDDVDPHYLKHFKEFMGAQRDWQSNTKYGKPIMIKGGIPTIFLCNKGPQSSYKEFLDEEKNAALKQWALKNAVFITLEGPLYSGRENVAPQEEEEEHPQETS	Geminiviridae	-	0.61
KC465466	Chilli leaf curl Bijnour virus-India	MPRTPSFCVNAKNIFLTYPKCPIPKEQMLEILQSINCPSDKLFIRVAQEKHQDGSLHVHALIQFKGKSKFRNPRHFDVTSPIPPGHFHPNIQGAKSASDVKAYIDKDGDVLEWGVFQIDGRSARGGQQTANDAYAKAINTGNKEDALKVLKELAPKDYVLQFHNLISNLDRIFQPRSEVYVSPFSISSFDRVPPELVDWAGVNVVCAAARPFRPISIVIEGDSRTGKTMWARCLGPHNYLCGHLDLSPKVFSNDAWYNVIDDVDPHYLKHFKEFMGAQRDWQSNTKYGKPVMIKGGIPTIFLCNKGPNSSYKEYLDEEKNAALKQWAIKNAVFITLEEPLYSGRENIAPTEEEEEHSQEAS	Geminiviridae	-	0.65
FN645915	Croton yellow vein mosaic virus	MAAFGSVRILNFFRNYEKAIWGHHINASPESPIPQSFECPQFNMPRINSFCVNAKNIFLTYPKCPIPKEQMLEILQSINCPSDKLFIRVAQEKHQDGSLHIHALIQFKGKAKFRNPRHFDVTHPNNSSQFHPNFQGAKSSSDVKSYIEKDSDYIDWGQFQIDGRSARGGQQTANDAAAEALNAGSADAALAIIREKLPKDFIFQYHNLKCNLDRIFTPPVEAYVSPFSSSSFDQVPQELEEWAAENVVSAAARPLRPISIVIEGDSRTGKTMWARSLGPHNYLCGHLDLSPKVYNNDAWYNVIDDVDPHYLKHFKEFMGAQRDWQSNTKYGKPVQIKGGIPTIFLCNPGPNSSYKEFLDEEKNAALKNWALKNATFITLEGPLYSGSNQSAAQDSQEGD…	Geminiviridae	-	0.58
KT582302	Lycianthes yellow mosaic virus	MPRHHSFCVNAKNIFLTYPQCSLSKQIVLEILQNISCPSDKLFIRVSSEKHQDGSLHIHALIQFKGKAKFRNERHFDISHPHAPRIFHPNFQGARSSSDVKAYIEKDGDYVDWGSFQIDGRSSRRSSHAAHDVAAEALNAPSKEDALNIIKEKLPKDFIFQYHNLSANLDKIFKPQQQQYVSPFNVTTFNNVPNELSQWVYQNVVDAAARPWRPMSIVIEGVSRTGKTLWARSLGKHNYLCGHLDLSPKVYSNDGWYNVIDDVDPHYLKHFKEFMGAQRDWQSNTKYGKPIQIKGGIPTIFLCNPGPSSSYKEYLDEEKNSALKEWALKNATFITLREPLFSGTSENPTQDCQEEDNSPEAN	Geminiviridae	-	0.58
JN807764	Pedilanthus leaf curl virus-[Crape Jasmine]	MPFGTHYILSTDIQVINIQNPIGTHLTKSMAPPKRFLIYAKNYFLTYPQCSLTKEEALSQFQNLSTPTNKKFIKICRELHEDGSPHLHVLIQFEGKYKCQNNRFFDLVSPTRSAHFHPNIQGAKSSSDVKSYMEKDGDTLDWGEFQIDGRSARGGQQSANDAYAAAINTGSKSEALRVIKEIAPKDYVLQFHNLNANLDRIFTPPVEVYVSPFCSSSFDQVPDELEEWAAENVVGSAARPLRPISIVIEGDSRTGKTMWARSLGPHNYLCRHLDLSPKVYNNDAWYNVIDDVDPHYLKHFKEFMGAQRDWQSNTKYGKPVQIKGGIPTIFLCNPGPNSSYKEFLDDEKHSALKNWALKNATFITLEGPLYSGSNQSAAQASQEGDQASES	Geminiviridae	-	0.65
JX025358	Jatropha mosaic Nigeria virus	MPNAPKKFQINCKNLFLTYPQCSLSKEETLSQLTNLSLPSNPKFIRICRELHQNGEPHLHVLVQFEGKVRLTNCRLFDLVSPTRSAHFHPNIQGAKSSSDVKAYLEKDGDVLDWGQFQIDRRSARGGKQSINDAYAQALNAGSKSEALRLIKELAPKDYVLQFHNLNSNLERIFTPPVEIYRSPFMSSSFDQVPDELEQWVADNVKAAAARPWRPKSIVIEGDSRTGKTMWARSLGPHNYLCGHLDISPKVYSNDAWYNIIDDVDPHYLKHFKEFMGAQRDWQSNTKYGKPIQIKGGIPTIFLCNPGPTSSYKEFLEEEKNSALKRWTLQNATFITISEPLYSGTNQSQAQNREDQENTS	Geminiviridae	-	0.58
AM236780	Malvastrum leaf curl Guangdong virus	MPQPSRFKINAKNYFLTYPDCSLAKEETLEKIKALDTPTNKKYIKICRELHQNGNPHLHVLIQFEGKYQCKNQRFFDLVSPTRSTHFHPNIQGAKSSSDVKSYINKHGDTLEWREFQIDGRSARGGQQSANDAYAQALNTGSKSEALNVIRELAPKHFVLQFHNLNANLDRIFAPPLEVFISPFSSSSFDQVPKELEEWTAENVVSAAARPWRPKSIVIEGESRTGKTMWARCLGPHNYLCGHLDLSPKVYSNDAWYNVIDDVDPHYLKHFKEFMGAQRDWQSNTKYGKPIQIKGGIPTIFLCNPGPNSSYKEYLDEDRNAALKAWTLKNAEFFTLTGPLYSGTNQSPTPHSEEEINSQEEN	Geminiviridae	-	0.63
KC161184	Papaya leaf curl virus	MAALPIRNLNFLLRITIMPFGDMLYIVSSLQFIPEFRVSPIPSADMATPKRFKIQAKNYFITYPKCSLTKEEALSQIQNIQTPTNKKYIKICRELHEDGSPHLHVLIQFEGKFVCTNNRFFDLVSPTRSAHFHPNIQGAKSSSDVKSYIDKDGDTMEWGEFQIDGRSARGGQQSANDTAAKALNSGSAEAALAIIREELPKDFIFQYHNIKNNLDRIFAPPLEVFISPFPSSSFDQVPEELEEWAAENVVSAAARPWRPKSIVIEGESRTGKTMWARSLGPHNYLCGHLDLSPKVYSNDAWYNVIDDVDPHYLKHFKEFMGAQRDWQSNTKYGKPIQIKGGIPTIFLCNPGPNSSYKEYLDEEKNAALKNWTLKNAEFFTLTGPLYSGTNQSPTPHREE…	Geminiviridae	-	0.53
DQ875879	Okra yellow crinkle virus	MPRAGRFSIKAKNYFLTFPKCSLSKEDALGQLKDLQTPTNKKYIKICRELHENGEPHLHVLIQFEGKYNCTNQRFFDLVSPSRSTHFHPNIQGAKSSSDVKSYIDKDGDTLEWGEFQVDGRSARGGCQTANDAAAEALNAGSADAAMAIIREKLPKDYIFQYHNLKSNLDRIFQAPPEVYVSPFSSSSFNNVPEELEEWAAENVVGAAARPWRPQSIVVEGDSRTGKTMWARSLGPHNYLCGHIDLSPRVYSNEAWYNVIDDVDPHYLKHFKEFMGAQRDWQSNTKYGKPIQIKGGIPTIFLCNPGPTASYKEYLEEDKNAALKAWAIKNATFITLSEPLYSTTDQSPAPHSQEEGSEA	Geminiviridae	-	0.55
KC172827	Lindernia anagallis yellow vein virus	MPFGDTYILSPVSNSFRKFDCLQLTKSMAPPKRFKIQARNYFLTYPHCSLTKEEALSQLKNIETPTNKKFIKICRELHEDGSPHLHVLVQFEGKFVCTNNRFFDLVSPTRSAHFHPNIQGXKSSSDVKSYMEKDGDTIDWGEFQIDGRSARGGCQNANDACAEALNAGSKEAALSIIREKLPKDYIFQFHNLNSNLDRIFTPPLEVYISPFSSSSFDQVPEELECWVSENVMDAAARPWRPNSIVIEGDSRTGKTMWARSLGPHNYLCGHLDLSPKVYSNEAWYNVIDDVDPHFLKHFKEFMGAQRDWQSNTKYGKPTQIKGGIPTIFLCNPGPTSSYKEYLDEEKNSALKAWALKNATFVTLEEPLYSGTNQSATPCREEESNSQTED	Geminiviridae	-	0.65
JX131285	Tomato yellow leaf curl Sardinia virus	MPRSGRFSIKAKNYFLTYPKCDLTKENALSQITNLQTPTNKLFIKICRELHENGEPHLHILIQFEGKYNCTNQRFFDLVSPTRSAHFHPNIQGAKSSSDVKSYIDKDGDVLEWGTFQIDGRSARGGQQTANDAYAKAINAGSKSQALDVIKELAPRDYVLHFHNINSNLDKVFQVPPAPYVSPFLSSSFDQVPDELEHWVSENVMDAAARPWRPVSIVIEGDSRTGKTTWARSLGPHNYLCGHLDLSQKVYSNNAWYNVIDDVDPHYLKHFKEFMGAQRDWQSNTKYGKPIQIKGGIPTIFLCNPGPQSSFKEYLDEEKNQALKNWATKNAIFVTIHQPLFADTNQNTTSHRQEEASEA	Geminiviridae	-	0.55
LM651404	Tomato leaf curl Mali virus	MARASFRINAKHYFLTFPKCSLTKEEALEQLLKLDTPTNKKYIKICKELHENGEPHLHVLLQFEGKFNCQNQRFFDLVSPTRSAHFHPNVQGAKSSSDVESYLDKDGDILEWGEFQIDGRSARGGQQTANDAYATALNTGSKQEALNVLRELAPRDYTLQFHNLNSNLDRIFQAPPEVYISSFSCSSFTQVPDELEEWVADNVRDSAARPWRPKSIVLEGDSRTGKTVWARSLGPHNYLCGHLDLSPKVYSNSAWYNVIDDVDPHYLKHFKELMGAQRDWQSNTKYGKPVQIKGGIPSIFLCNPGQTSSYKEFLDEEKNKALKAWAVKNATFVTLTEPLFSNANQGSPQTGQEETDQA	Geminiviridae	-	0.52
AB267838	Pepper yellow leaf curl Indonesia virus-[Ageratum]	MPPPRRFKLQSKNYFLTYPKCSLTKEEALEQLKSLSTPVNKLFVKICRELHEDGSPHLHVLVQFEGKYVCTNNRFFDLVSPARSAHFHPNIQGAKSSSDVKAYMDKDGDSIEWGEFQIDGRSARGGQHAVNEVYAQALNSGSKSDALQLIKELAPKDYVLQYHNLSVNFDKIFTTPVDTFVSPYPSSSFDQVPEELRQWAGENVKDAAARPWRPISIVIEGESRTGKTMWARSLGPHNYLCGHLDLSPKVYNNDSWYNVIDDVDPHYLKHFKEFMGAQRNWQSNTKYGKPIQIKGGIPTIFLCNPGPASSYKEYLAEDKNTALRSWALKNATFVTINEPLYSNSTEDTAQTCEEETNPQETN	Geminiviridae	-	0.58
AF240675	Tobacco curly shoot virus - [Y1]	MPQLKKFIINAKNYFLTYPQCSLTKEEALSQISALSTPTNKLFIRICRELHEDGSPHLHVLIQFEGKFKCQNNRFFDLTSPSRSAHFHPNIQGAKSSTDVKAYMEKDGDVLDHGVFQIDGRSARGGCQSANDAYAEAINSGSKAAALNILKEKAPKDFVLQFHNLNSNLDRIFTPPIEKTFLLFYLLLSTKFQKNLKNGLLANVVSAVGGPLRPMSIVIEGDSRTGKTMWARSLGPHNYLCGHLDLSPKVYNNDAWYNVIDDVDPHYLKHFKEFMGAQRDWQSNTKYGKPVQIKGGIPTIFLCNPGPNSSYKEFLDEEKNKALKNWSLKNAIFVTLESPLYTGSNQSEAQASQGGEQASTC	Geminiviridae	-	0.52
GQ870288	Tomato leaf curl Vietnam virus	MAPPNKFRINAKNYFLTYPHCSLTKKEALSQLKNLETPVNKLFIRICREFHEDGTPHLHVLIQFEGKFQCKNQRFFDLISPSRSAHFHPNIQAAKSSTDVKSYMDKDGDVLDHGLFQIDGRSARGGCQSANDAYAEAINSGSKASALNILREKAPKDYVLQFHNLNNNLDRILPSMEVYVSPFSSSSFDRVPEELEEWAAENVVSAVAGPLRPIIIVIEGDSRTGKTMWARSLGPHNYLGGHLDLEPKVYNNDAWYNVIDDVDPHYLKPFKEFMGGQRDWQSNTKYGKPVQIKGGNPTIFLCNPGPNSSYKDYLDEDKNSALKYWALKNAIFVTLQGALYSGSYQGATPHRQESNEETKS	Geminiviridae	-	0.53
AF134484	Pepper leaf curl virus	MAPPKNLRINAKNYFLTYPHCSLTKEEALSQIQAIETPTIKLFIRICRELHEDGTPHLHILIQFEGKFQCKNPRFFDLTSPTRSAHFHPNIQGAKSSTDVKEYIAKNGDVLDHGVFQIDGRSARGGCQSANDAYAEALNSGTKASALAILKEEAPKDYILQFHNLNSNLDKIFSLRIEMYISPFLVSFDQVQRNLNEWVAANVVKPARPLRPISIVVEGDSRTGKTMWARSLGPHNYLCGHLDLSPKVYNNDPWYNVIDDVDPHYLKHFKEFMGAQRDWQSNTKYGKPVQIKGGIPTIFLCNPGPHSSYKEFLEEEKNTALKNWALKNAIFVTIEGPLFSGSHQGATQNRQEDN	Geminiviridae	-	0.58
KF515622	Okra leaf curl virus-[India:Mau:2012]	MPAPNRFKINAKNYFLTYPKCSLTKEEALSQFLNLETPTSKKFIRICRELMKMGLLHLHVLIQFEGKFQCRNNRFFDLTSPSRSAHFHPNIQGAKSSSDVKAYMEKDGDILDHGVFQVDGRSARGGCHTANDAYAEAINSGSKAQALNILKEKAPRDFLLQFHNLNSNLDRFFTPPVEVFKSRYLSSSFDQVPEELEEWAAENVMDAAARPERPLSLVLEGESRTGKTQWARSLGPHNYLCGHLDLSPKEYSNDAWFNIIDDVDPHYLKHFKEFMGAQRDWQSNTKYGKPVQIKGGIPTIFLCNPGPNASYKEFLDEDKNSALKSWALKNATFVFLTQPLYSGTNQSSTQGGEESAQEETSGP	Geminiviridae	-	0.55
JF502362	Cotton leaf curl Rajasthan virus	MPPKRNGFYSKNYFITYPKCSLTKEEALSQLLNIQTPTSKKYIRICRELHEDGTPHLHVLIQFEGKFKCQNMRFFDLVSPSRSAHFHPNIQGAKSSSDVKSYIEKDGDILDWGQFQIDGRSARGGQQTANDAYAAALKGGNKSEALRVIKELAPKDFVLQFHNLNENLERIFQGPPAPYGSLFSSSFFEQIQKKLEGGVAENVVSAVGRPIRPISLVVEGDSRTGKTMWARSLGPHNYLGGHLDLSPRVYSNDAWFNLFDDADPHYLKHFKEFMGAQKDWQSNTKYGKPVQIKGGIPTIFLCNPGPNSSYKEFLDEEKNSALKNWALKNAIFITLDRPMFSGTNQSTAQGSEEAQQEEESRS	Geminiviridae	-	0.67
FJ159269	Mesta yellow vein mosaic virus [India:Amadalavalasa:2008]	MPPRRNGIYSKNYFVTYPKCSLTKEEALSQLLNLQTPTSKKYIKICRELHEDGTPHLHVLIQFEGKFKCQNMRFFDLVSPNRSAHFHPNIQGAKSSSDVKSYIDKDGDILEWGKFQIDGRSARGGQQTANDAYAAALGKGVRSEASQFGNELDRKDFVLQYHNANANQDRIGQDTPVPYPFPFSSSQSNQGTEEREESAKENVVDAAARPLGPQSISTEGDSRTGKTMWCMSLGPHNYLCGHLDLSPKVYSNDAWYNVIDGVDPHFLKHFKEFMGAQRDWQSNTKYGKPVQIKGGIPTIFLCNPGPISSYKEFLEEEKNTALKNWAVKNAIFVTLEGPLYSGTNQSTAQGSEETQQEEESRS	Geminiviridae	-	0.63
JF502353	Cotton leaf curl Burewala virus	MAPPKRFKVQAILYVITYPQCSLTKEEALSQIQAINTPSKKKYIKLCRELHEDGSPHLPVLIRFEGKFVCTNNKFFDLVSPNRAAHFHPNIQGAKSSSDVKAYINKDGDAFEWGEFQIDGRSPRGGQQTANGAYAAALNAGSKSEALRVLKELAPKIFGLQFHNLNANLTRIFREAPAPYIFPFSPSSFDQVPEELGIWAIDNVVDAAARPLRPRSIVIEGDSRTGKTMWARSLGPHNYLCGHLDLSPKIYSNDAWYNVIDDVDPHFLKHFKEFMGAQRDWQSNTKYGKPVQIKGGIPTIFLCNPGTNSSYKEFLNEEKNTALKNWALKNAIFITLEGPLYSASNQSTAQGSEETQQEEESRYE	Geminiviridae	-	0.67
JQ305797	Clerodendrum golden mosaic China virus	MPLGDKVYIVHQSPIHSTEFVVTDTKTTILMAPPRRFRVSAKNYFLTYPHCSVTKDETLSQLRTINTQVNKKYIKVCRELHEDGSPHLHVLIQFEGKFVCTNNRLFDLVSPTRAAHFHPNIQGAKSSSDVKSYIDKDGDTLEWGEFQIDGRSARGGQQSANDAYAQALNTGSKQDALRIIRELAPKDFILQFHNLSSNLDRIFAPEVPVYTSPFLSSSFNRVPEELEVWVSENVKSAAARPLRPKSIVIEGDSRTGKTMWARSLGPHNYLCGHLDLSPKVYSNDAWYNVIDDVDPHYLKHFKEFMGAQRDWQSNTKYGKPVQIKGGIPTIFLCNPGPGASYIEFLNEEKQTALKNWALKNAEFVSLTEPLFSSPNQGPTQDFQEEANTTTEG	Geminiviridae	-	0.55
JQ911766	Hollyhock yellow vein mosaic virus	MPPAKPFKINAKNYFITYPKCSLTKEDALSQLQNLETPVNKKYIRICREFHENGEPHLHVLIQFEGKYQCKNNRFFDLVSPTRSAHFHPNIQGAKSSSDVKSYIAKDGDILEWGEFQIDGRSARGGQQTANDAYAAALNAGSKSEALRVIKELAPKDFVLQFHNLNANLDRIFQEPPAPYVSPFSSSSFDQVPEELEEWACENVVDAAARPHRPQSIVIEGDSRTGKTMWARSLGPHNYLCGHLDLSPKVYSNDAWYNVIDDVDPHFLKHFKEFMRAQRNWQSKAMYWKSVQINGRMLPIYLSNPGPNSSYKRILDDGKNPALKIWTVQNAIFVTFEGTLYSGSNQGTAQGSEETQQGEESRS	Geminiviridae	-	0.6
AY795982	African cassava mosaic virus	MSPIDLVNMRTPRFRIQAKNVFLTYPKCSISKEHLLPFIQTLSLPSNPKFIKICRELHQNGEPHLHALIQFEGKITLTNNRLFDCVHPSCSTSFHPNIQGAKSSSDVKSYLDKDGDTVEWGQFQIDGRSARGGQQSANDAYAKALNSGSKSEALNVIRELVPKDFVLQFHNLNSNLDRIFQEPPAPYVSPFLCSSFDQVPVEIEEWVADNVIDSAARPWRPNSIVIEGDSRTGKTIWARSLGPHNYLCGHLDLSPKVYNNAAWYNVIDDVDPHYLKHFKEFIGAQRDWQSNTKYGKPVQIKGGIPTIFLCNPGPTSSYKEFLDEEKQEALKAWALKNAIFVTLTEPLYSGSHQSQSQTIQEASHPA	Geminiviridae	-	0.61
FM877473	African cassava mosaic virus	MRTPRFRVQAKNVFLTYPKCSIPKEHLLSFIQTLSLPSNPKFIKICRELHQNGEPHLHALIQFEGKITITNNRLFDCVHPSCSTNFHPNIQGAKSSSDVKSYLDKDGDTVEWGQFQIDGRSARGGQQSANDAYAKALNSGSKSEALNVIRELVPKDFVLQFHNLNSNLDRIFQEPPAPYVSPFPCSSFDQVPDEIEEWVADNVRDSAARPWRPNSIVIEGDSRTGKTIWARSLGPHNYLCGHLDLSPKVFNNDAWYNVIDDVDPHYLKHFKEFMGSQRDWQSNTKYGKPVQIKGGIPTIFLCNPGPTSSYKEFLDEEKQAALKTWALKNAIFITLTEPLYSGSNQSQPQTIQEASHPT	Geminiviridae	-	0.61
JN618982	Watermelon chlorotic stunt virus	MRPPRFRIQAKNIFLTYPRCSLSKEELLSFLVGLSLPSNLKYVKVCRELHQNGEPHLHVLLQFDGKITITDNRLFDHVHPSRSACFHPNIQSAKSSTDVKSYLDKDGDTVEWGKFQIDGRSARGGQQTANDAYATALNMSNKGEAMSVIKELAPKDFVLHYHNIKSNLDRIFEEPVAPFVCPFPISSFTLLPPELVEWASTNVCSSAARPWRPKSIVVEGESRTGKTMWARSLGPHNYLCGHLDLSPKIYSNDAWYNVIDDVDPHYLKHFKEFMGAQRDWQSNTKYGKPIQIKGGIPTIFLCNPGPSSSYKEFLEEEKNYALKEWADKNADEFVFLSEPLFSAEHQDQTQTRQKEDDSATTS	Geminiviridae	-	0.57
DQ375456	Alternanthera yellow vein virus	MRQPGQFRLNRKNFFLTYSQCPISKEEALQQLINTQTPVNKKFIRVCKELHEDGNPHLHALVQFEGKFCLTNPRFFDLQSPNSSAQYHCFITDAKSSSDVKAYIEKDGDILDWGTFQIDGRSARGGQQTANDAYARAINTGNKEQALDVVRELAPKDYVLQFHNLNANLERIFMPPPQEYISPFNCSSFDQVPEEIEEWAADNVMSAAARPWRPISIVIEGDSRTGKTMWARSLGPHNYLCGHIDLSPRVYSNEAWYNIIDDVDPHYVKHFKEFMGAQRDWQSNTKYGKPVQIKGGIPTIFLCNPGPTSSYKEFLDEEKNIGLKNWALKNATFVTINQPLYSGSHQSPTQASQEETSQTEG	Geminiviridae	-	0.57
KF551592	Tomato leaf curl New Delhi virus 4	MVSPGRVRENAKKYFLTDPKCSLTKGEALCQLQTRETQGQKKFLSICRELHVDGFRHIQVVIQFEGKFHCKNNRCLELVSPSRSAHFHPDIQGAKSSSDVKSYMEKDGDVLEWGVFQVDGRSARGGCQSANDPYAEAINSGSKSQALNILREKSPTYFVLQFHNLNTNLDRIFQPPSEVYVSPFSISSFDRVPADLVDWVTSNVVCAAARPFRPISIVIEGDSRTGKTMWARCLGPHNYLCGHFDLRPKVYSNEAWYNVIDDVDPHYLKHFKEIMGAQRDWQSNTKYGKPVQIKGGNPTTFLCNPGPNSSYKEYLDEEKNSALKTWALKNATFVTLEGPLYSGTNQSTAQASQEGDQTSTS	Geminiviridae	-	0.7
KM435321	Tomato yellow leaf curl virus	MPRLFKIYAKNYFLTYPNCSLCQEEALSQLKNLETPTNKKYIKLCRELHENGERHLHVLIQFEGKFQCKNQRFFDLVSPNRTPHFHPNIQAGKSSTDVKTYVDQDGDLIDFGVFQINSRSARGGQQSANDAYAEALNSGSKSEVLNILKENAPNDYILQFHYLSSNLDRIFSPHLEVYISPFLSSSFNQVPVELDEWVAENVVSTAARPWTPISIVIEGDSRTAKTMWARSLGPLNYLCGHLDLSPKVYRNDVWYNVIEDVDPHYLKHFMVFMGAQRDWQSNRKYGKPIQIKGGIPSIFLCNPRPTSTYREYLDEEKNISLKNWALKNAIFVTLYDPLFASINQGPRQDSQEETNKA	Geminiviridae	-	0.6
GQ472984	Soybean mild mottle virus	MPRSGYFCVKAKNIFLTYPRCSLTKEEALSQLQSIQCPSNKKFIKIARELHENGEPHLHVLIQFEGKCQITNERHFDLTSPRRSTHFHPNIQGAKSSSDVKTYIDKDGDTIQWGSFQIDGRSARGGCKNANDACASALNAGSAEAALQIIKEQLPRDYVFQYHNVISNLNKIFTPPTTIYKSPFKVEQFNNVPEVLSQWASDNVKASAARPMRPISIVLEGESRTGKTMWARSLGRHNYLCGHLDLSAKVYSNDAWYNVIDDVDPHYLKHMKEFMGSQRDWQSNVKYGKPTQIKGGIPTIFLCNPGPRSSYKEYMDEESNAALKEWALKNAIFYTLEEPLFSTEHQGST	Geminiviridae	-	0.52
HQ162271	Kudzu mosaic virus	MSRPKGFRVNAKNFFLTYPRCSLSKEAALEQLQNIQTNVNKKFIRVCREFHENGEPHLHVLLQFEGKFQCRNERFFGLVSETRSAHFHPNIQGAKSSSDVKKYMEKDGDVIDFGIFQIDGRSNRGGSQCANDAYAEAINSGDTTSALNILKEKASRDFIIHLHNIRANLNFLFAPPPTVYETPFSIESFNNVPETLTSWAAENVVCPAARPFRPISIVVEGESRTGKTMWARSLGRHNYLCGHLDLSAKVYSNDAWYNVIDDVDPHYLKHFKEFMGAQKDWQSNVKYGKPTQIKGGIPTIFLCNAGPRSSYKMFLDEENNASLKEWALKNAIFYTLTEPLFSTTNQGATQVGQETCNSTQTN	Geminiviridae	-	0.48
KP752090	Rhynchosia yellow mosaic virus	MPTPGRFVINAKNYFLTYPRCPLSKEEALSQLLALQTPTNKKFIRVSRELHDDGTPHLHALLQFEGKFQTRNQRFFDLVSQTRSAHYHPNIQAAKSASDVKQYVEKDGDFIDHGAFQVDGRSARGGKQSANDAYAEAINAESKSEALTILKEKAPKDYVLQFHNINCNLDRLFAPRVPVYSSIYSIASFNNVPEGLRAWAATNVKDTAARPDRPISVVIEGDSRTGKTMWARALGRHNYLCGHLDLSAKVYSNDAWYNVIDDVDPHYLKHFKEFMGAQKDWQSNVKYGKPTHIKRGIPTIFLCNPGPRSSYKEYLDEANNASLKVWALKNAEFYTLQAPLFSSVDQGSTQVRQEEEGQSNSPNTN	Geminiviridae	-	0.55
KM386645	Apple geminivirus PL-2015	MPREPNTRRFKVQAKNYFLTYPRCSLSKEEALEQILGLNTPTNKKFVRVCRELHEDGEPHLHVLIQFEGKYTCTNQRFFDLVSPTRSAHFHPNVQGAKSASDVKTYIEKGGEFLDHGVFQIDARSARGQGQHLAEVYAEALNAPDASASLQIIKEKDPKTFYTQYHNLSANAAKIFMAPPEPFRCIYLSSSFNNVPEELDDWVSVNIVSDPAARPRRPKSIFIEGETRTGKTEWARSLGPHNYLCGHLDLSPKVFSNDALYNVIDDVDPHYLKHFKEFCGSQRDWQSNTKYGKPLLVKGGIPTIFLCNPGPTSSYKEWLDEEKNSNLKNWALGNAVFVFLSAPLFDPTTSSP	Geminiviridae	-	0.4
AM701758	Tomato leaf curl Anjouan virus	MPLEYTLYIVPLYTDILVSCVYPDSKRQLKMPRAGRFKINAKNYFITYPQCSITKEEALAQIKSFSYPTNIKFIRVCRELHQDGLPHLHVLIQFEGKFQCTNQRFFDLVSQTRSAHFHPNIQGAKSSSDVKAYIEKGGEFLDYGVFQVDARSARGEGQHLAQVYADALNASSKEEALQIIKEKDPKSFFLQYHNLSANADKIFMTPPNPYVSNFLTSSFDQVPEELEIWVSENVMDAAARPWRPMSIVLEGDSRTGKTMWARSLGPHNYLCGHLDLSPKVYSNDAWYNVIDDVDPHYLKHFKEFMGAQRDWQSNTKYGKPIQIKGGIPTIFLCNPGPTSSYKEYLEEDKNAPLKAWATKNATFVTLHEPLFSNTNQGQTPHSEEDTHST	Geminiviridae	-	0.58
KP663483	Asystasia mosaic Madagascar virus	MIPNMPRAGRFNINAKNYFLTYPQCSLSKEETLSLLLAKQIPVNIKFIRVCRELHQNGEPHLHVLLQFEGKYQCTNQRFFDLVSPNRSTPFHPNIQGAKSSSDVKTYIEKGGDFIDHGEFQIDARSARGQGQNLADLYADALNASNKEAAMRLIKERDPKSYFLQYHNISANAEKIFAPKRVPYESPYTPASFTNVPEELKLWVAENVMGPAARPQRPKSIVIEGSSRTGKTMWARQLGPHNYLCGHLDLSNKVYSNNAWYNVIDDVDPHYLKHFKEFMGAQHNWQSNIKYGKPVQIKGGIPTIFLCNPGPQSSYKEFLDEPKNAGLKQWALKNATFITISEPLYSCANQSSAQAGQEEETT	Geminiviridae	-	0.48
JF694484	West African Asystasia virus 1	MPRVGRFKINAKNYFLTYPQCSISKEEALQKLISLRTPTNIKFIRVCRELHQDGEPHLHVLIQFEGKYQCTNQRFFDLESPTRPTPYHPNIQGAKSSSDVKSYIEKGGDFIDHGQFQVDPRSARGEGQCLADVYAEALNAADKDSALQVIKEKDPKNFFLQYHNISANANHIFAPKITPYVSPYDPNSFDNVPEAMKEWASKNVMGPAARPDRPLSIVIEGPSRSGKTKWARALGPHNYMCGHIDLSLKVYNNNAWYNVIDDVDPHYLKHFKEFMGAQHNWQSNVKYSKPVQIKGGIPTIFLCNPGPQSSYKEYLEEPKNAQLKIWAEQNASFIYLEAPLYTSTNQSEPQTGEEEAPEAQNN	Geminiviridae	-	0.55
DQ641694	Spilanthes yellow vein virus	MAPNNRFRVSARNYFLTYPHCSLTKEETLSQLSNLVCPTNKKFIKICRELHEDGSPHLHVLIQFEGKYVCTNKRFFDLVSPTRSTHFHPNIQGAKSSSDVKSYIDKDGDTLEWGEFQIDGRSARGGQQDLNDLGAEVWNATSVNAAKQLVKEKQPWTYLLQRHNIVANIEKEFEKPPEPFVCPFPTTAFDNVPTMMKVWAQEFVTNSAARPLRPKGIVIEGESRTGKTLWARSLGPHNYLCGHLDLNPNVFSNDAWYNVIDDVDPHYLKHYKEFMGSQTNWQSNRKYGKPVQIKGGIPTIFLCNPGPTSSYTEFLEEEKNAKLKRWSNYNAIFITLNEPLYSTEYQGPAPRGEEEDHQETED	Geminiviridae	-	0.39
KT878824	Deinbollia mosaic virus	MPRAGRFSVNAKNYFLTYPNCPLDKNEALSQLQAKQTPVNKLFIKVCRELHESGEPHLHALVQFQGKYNCTNQRFFDLESPTRSAYYHPNIQRAKSSSDVKSYIDKDGDTTSWGEYQIDGRSARGGKQDLNDLGAEALNTGSAEGAIKIIKERQPWTFILQRHNIVSNLEREFIKPLEPYVSPFHISTFTNVPTIIQDWASQNVKSPAARPLRPQSIVIEGDSRTGKTVWARSLGPHNYLCGHLDLNNKVYSNDAWYNIIDDVDPHYLKHFKEFMGAQQNWQSNTKYGKPIQIKGGIPTIFLCNPGPTSSYKEYLDEAKNASLKLWAIKNATFITLTEPLFSPNTTSETQRSQEENYQTTEDRS	Geminiviridae	-	0.39
AY044135	Macroptilium yellow mosaic Florida virus	MPSRPKRFKINAKNFFLTYPQCSLSKEETLSQIKALNTPTSKKYIKIARELHENGQPHIHVLIQFEGKYQCTNYRFFDLVSPSQSAYFHPNVQGAKSSSDVKSYIDKDGDTLEWGEFQVDGRSARGGCQTVNDSYAKALNASSAEEALKIIREEQPAHFFLQHHNLVVNASKIFQKPPEPWVPTFQLSSFTNVPAEMQDWADQYFGRSAAARSERYMSIIVEGDSRTGKTMWARALGPHNYLSGHLDFNSQVYSNEVEYNVIDDINPNYLKLKHWKELIGAQKDWQSNCKYGKPVQIKGGIPSIVLCNPGEGSSYKEFLDKEENRALHNWTIKNALFVTLTAPLYQSTP	Geminiviridae	-	0.53
KT879825	Sida golden yellow vein virus	MPRKGSFLYKAKNYFITYRVLSCSKEEALSQLQNLNTPVNKKFIKICREFHQNGKPHLHVLIQFEGKFNCTNYRLFDLVSPTRSTHFHPNIQGARSSSDVKSYVAKDGDTIEWGVFQIDGRSARGGQQTANDAAAEALNSGTKEEAMKIIKEKLPEKFLFQYHNLSSNLDRIFSKAPEPWTPPFPLSSFTAVPDEMQQWADEYFGRGAAARPERPVSIIVEGDSRTGKTMWARSLGPHNYLSGHLDFNARVFSNEVEYNVIDDVAPQYLKLKHWKELLGAQKDWQSNCKYGKPVQIKGGIPSIVLCNPGEGASYKDFLDKEENSALRNWTNKNAKFITLTAPLYQEGTLASQEEGNQEAQD	Geminiviridae	-	0.57
KC706605	Tomato leaf distortion virus	MPPPKRFKISSKNYFVTYPHCSLTKEEALAQLKLLNTPTNKKYIKICRELHENGEPHLHVLIQFEGKYQCTNNRFFDLVSPSRSAHFHPNIQGAKSSSDVKSYIDKDGDTIEWGEFQVDGRSARGGQQTSNDAAAEALNASSKEEAMMIIKEKLPEKFLFQYHNLSSNLDRIFKKAPDPWVPPFPLSSFTNVPDEMQEWADEYFGRGAAARPVRPMSIIVEGDSRTGKTMWARALGSHNYLSGHLDFNSRVYSNDVEYNVIDDVTPHYLKLKHWKELIGAQKDWQSNCKYGKPVQIKGGIPSIVLCNPGEGASYKDFLEKEENASLKSWTLYNAKFIFLDSPLYQTATQDCEEESNPAATD	Geminiviridae	-	0.55
FN557522	Sida micrantha mosaic virus	MPSKPPRFRVQAKNIFLTYPQCSLTKEEALSQLQAIHLPSNKKFIKICRELHEDGQPHLHILLQLEGKIQVTNNRLFDLVSPNRSARFHPNIQGAKSSSDVKSYIDKDGDTVEWGEFQVDGRSARGGQQTANDAAADALNAPDKQTALRIIREKLPEKYLFQFHNLNSNLDRIFSKAPEPWVPPFPISSFINVPEEMQEWADDYFGRSSAARPLRPMSLIVEGDSRTGKTMWARALGPHNYLSGHMDFNSRVFSNEVEYNVIDDVTPQYLKMKHWKELIGAQRDWQSNCKYGKPVQIKGGIPSIVLCNPGEEVSYKEFLDKEENAALKSWTLHNAKFIFIDSPLYQTTSQSGEEERNSP	Geminiviridae	-	0.58
FN436001	Sida Brazil virus	MPPPKRFKVNAKNYFLTYPDCSIAKETALEQLINLETPSKKKYIRVCREFHENGKPHLHALVQFEGKFQCTNCRFFDLKHPNTSSVAHANIQGAKSSSDVKSYIKKDGDYIDWGTFQIDGRSARGGQQTANDAASEALNSSSKEEAMQIIKEKLPEKFLFQYHNLSTNLDKLFKKAPEPWVPPFQLSTFTNVPHEMQEWADDYFGRVVAARPDRPISLIVEGDSRTGKTMWARALGPHNYLSGHLDFNSRVFSNEVEYNVIDDVSPHYLKLKHWKELIGAQRDWQSNCKYGKPVQIKGGIPSIVLCNPGEGASYKEFLDKQENAALRSWTLHNAKFIFLDSPLYQTTAQDRQEESDQTTAS	Geminiviridae	-	0.52
FJ665283	Bean golden mosaic virus-[Brazil:SAdG 7:soybean:2008]	MPPPKRFKINAKNYFLTYPQCSITKESAIEQLQNLQTPVNKKYIRICREIHENGEPHLHALIQFEGKFQCTNCRVFDLKHPTTSSVSHANIQSAKSSSDVKSYIEKDGDYIEWGHFQVDGRSARGGQQTANDAASEALNASSKEEAMQIIKEKLPEKFLFQYHNLSSNLDRIFTKAPWSPPFHLSSFTNVPREMQEWADDYFGRGAAARPERPISIIVEGDSRTGKTMWARALGTHNYLSGHLDFNSKVFSNHAEYNVIDDIAPHYLKLKHWKELMGAQKDWQSNCKYGKPVQIKGGIPSIVLCNPGEGASYKCFLDKEENAALKHWTIHNAKFIFLDSPLYQSSTQSCEETSNQTTSR	Geminiviridae	-	0.52
KT948785	Pavonia mosaic virus	MPPPKRFKVNAKNYFLTYPRCSISKEEALSQLLALETPTNKKYIRVCRELHEDGAPHLHALLQFEGKFQCTNCRFFDLRHPQHSNVCHGEYKSCKSSSDAKSYIEKGGDYIEWGTFQIDGRSARGGQQTANDAAAEALNAASKDEAMQIIKEKLPEKFLFQYHNLSSNLDRIFSKPPEPWASPFPLSSFTNVPDEMKDWVAQYIGLDAAARPVRPVSLIIEGDSRTGKTMWARALGPHNYLSGHLDFNSRVYSNEVEFNVIDDVSPHYLKLKHWKELIGAQRDWQSNCKYGKPVQIKGGVPSIVLCNPGEGASYKDFLDKAENSALKAWTLHNATFVFLDSPLYQTSTQGGETENNSS	Geminiviridae	-	0.52
JN419005	Macroptilium yellow spot virus	MPPPRRFKIQSKNYFLTYPKCSISKEEALAQLLALDTPTNKKYIRVCRELHGNGEPHLHALLQFEGKFTCTNCRFFDLRHPSHSNVCHGKYESCKSSSDAKSYIEKDGDYVEWGDFQIDGRSARGGQQTVNDTYAKALNASSVEEALQIIKEEQPQHFFLQHHNVVANAYRIFQKAPEPWTPPFPLSSFINVPEEMKAWADDYFGRSAAARPERPISIIIEGDSRTGKTMWARALGSHNYLSGHLDFNSKVYSNDVQYNVIDDIAPQYLKLKHWKELIGAQKDWQSNCKYGKPVQIKGGIPCIVLCNPGEGASYKSFLDKEENASLRQWTIHNAQFVFLNSPLYQSSTYSGQEESNQEKTN	Geminiviridae	-	0.53
FJ972767	Passionfruit severe leaf distortion virus	MPSEPRRFRVNCRNFFLTYPKCSLSKEEALSQLLALETPTNKKFIRVSRELHEDGQPHLHVLIQFEGKYNCQNNRFFDLVSTTRSTHFHPNIQGAKSSSDVKTYVEKDGDFIDHGIFQIDGRSARGGQQSANDTYAKVLNSGSVMEALNILREEQPKDFVLQHHNIRSNLERIFQKAPEPFVPPFPLSSFTLVPEEMQEWADSYFGLDAAARPERAISIIIEGDSRTGKTMWARSLGVHNYLSGHLDFNSRVYSNDVEYNVIDDISPHYLKMKHWKELIGAQRDWQSNCKYGKPVQIKGGVPSIVLCNPGEGSSYKDFLDKEENASLRNWTLRNAQFVFLNSPLYQTTTQNRQEESG	Geminiviridae	-	0.45
JX122965	Soybean chlorotic spot virus	MPPPKRFRINAKNYFLTYPQCSLSKEAALEQIISLQTPSSKKFIKIARELHDDGQPHLHVLLQFEGKFCCTNNRLFDLVSPTRSAHFHPNIQGAKSSSDVKSYVDKDGDTIEWGEFQVDARSARGGQQTANESYAKVLNADNLERALQILKEEQPKDFVLHHHNIRSNLERIFAKAPEPWAPPFHLSSFTLVPQEMQDWVNDYFGRGAAARPERPISIIIEGDSRTGKTMWARALGSHNYLSGHLDFNSRVYSNDVQYNVIDDIAPQYLKLKHWKELIGAQKDWQSNCKYGKPVQIKGGVPCIILCNPGEGSSYKSFLDKEENAGLKGWTLHNAKFVFLNSPLYQSSTQSS	Geminiviridae	-	0.5
GQ387369	Tomato yellow vein streak virus	MPPPKRFSVNAKNFFLTYPHCSLTKYEALSQLQALQTPTHKKFIRVTRELHEDGEPHLHVLIQFEGKFKCHNQRFFDLVSPTRSAHFHPNIQGAKSSSDVKTYMEKDGDFIDFGTFQIDGRSARGGCQSANDTYAKVLNADNPSTALNILKEEQPRDYVLHLDKIRTHVQRLFAKAPRGPWVSPFQLSSFTNVPDEMQEWADKYFGRGAAARPERPISIIIEGDSRTGKTMWARALGPHNYLSGHLDFNSRVYSNEVDYNVIDDVTPXYLKLKHWKELVGAQRDWQSNCKYGKPVQIKGGIPSIVLCNPGEGASYKDFLDKHENVSLKTWTLHNAKFIFLNSPLYQTTTQSSQTESDSPKTH	Geminiviridae	-	0.52
JN103438	Cleome leaf crumple virus	MRHQTPIHFTKLSETPIGASFIFTNMPLSKPFRINARNYFLTYPKCSLTKEEALSQLQALATPTNKKFIKVARELHENGEPHLHVLLQFEGKFQCKNNRFFDLVSPSRSAHFHPNVQGAKSSSDVKSYVDKDGDTLEWGTFQIDGRSARGGCQSANDTYAKVLNAESAAQALQILREEQPRDFVLHLDKVQAHVQKIFAKAPEPWVPPFPLSSFTNVPDEMQSWADEYFALSAEARPNRPISLIVEGDSRTGKTMWARALGPHNYLSGHLDFNSRVYSNEAAYNVIDDVAPHYLKLKHWKELVGAQRDWQSNCKYGKPVQIKGGIPSIVLCNPGEGSSYKDFLDKEENSALRSWTLHNARFVFLESPLYQSATQSGETESHSP	Geminiviridae	-	0.53
KC176780	Tomato yellow mottle virus	MPPPKKFRLSAKNIFLTYPRCSLTKEEALFQLQNISLPSNKLFIRVARELHEDGEPHLHVLIQLEGKVQIYNQKLFDLSSTSRSAYFHPNIQGAKSSSDVKSYMEKDGEFLDFGVFQIDGRSSRGGIQTTNDSYAKALNAGSAESALQILKEEQPAHYFLHYHNLVNNANRIFQKAPEPWVPPFQLSSFNAVPDEMQEWADDYFGRGAAARPERPISIIVEGDSRTGKTMWARSLGPHNYLSGHLDFNSRVYSNEVEYNVIDDVAPHYLKLKHWKELIGAQKDWQSNCKYGKPVQIKGGIPSIVLCNPGDGGSYKDFLDKEENASLKQWTLKNAKFIFLNSPLYQTSSQER	Geminiviridae	-	0.52
DQ520943	Tomato golden mottle virus	MPPPRRFRLQAKNIFLTYPLCSLTKDEALEQLQSIQLTSNKRYIKICRELHENGKPHLHALVQLEGKVQITNERQFDLVSPTRSAHFHPNIQGAKSSSDVKSYIDKDGDTLEWGEFQIDGRSARGGQQTANDSYAKALNANGVQEALQILKEEQPRDFVKDFHNLKGNLEKIFTKAPEPWVPPFSLSSFNNVPEELQSWADDYFGNGCAARTLRPISIIIEGDSRTGKTMWARSLGIHNYLSGHLDFNSRVYSNDVMYNVIDDVPPHYLKMKHWKELIGAQTDWQTNCKYGKPIQIKGGIPSIVLCNPGEGASYKYYLDKQENSHLKAWTHHNAEFVFLDAPLYQT	Geminiviridae	-	0.53
KF661331	Jacquemontia yellow mosaic virus	MPRRGSFSVNAKNYFLTYPQCSLTKEDVLSQIQNLQTPTNKKYIKVCRELHENGEPHLHVLIQFEGKYNCTNNRFFDLVSPNRSTHFHPNIQGAKSSSDVKSYLDKDGDVIEWGEFQIDGRSARGGQQTANDTYAKALNASTMEESLQIIKEQQPAHYYLQYHNLVANATRIFRKPPEQWIPPFPLSSFNNVPEVLQEWADNYFGRDPAARPLRSKSIIIEGDSRCGKTMWARALGKHNYLAGHLDFNAKCYSDDVDYNVIDDVSPSYLKLKHWKDLIGAQTQWQTNCKYGKPIMIKGGVPSIVLCNPGEGSSYKDFLEKEENASLKRWTLYNAEFVFLDSPLYQTSTQGSQEEGSPA	Geminiviridae	-	0.48
NC_001412	Beet curly top virus	MKVVLIYIILQYSNRYVNMLSHVIGVXMPPTKRFRIQAKNIFLTYPQCSLSKEEALEQIQRIQLSSNKKYIKIARELHEDGQPHLHVLLQLEGKVQITNIRLFDLVSPTRSAHFHPNIQRAKSSSDVKSYVDKDGDTIEWGEFQIDGRSARGGQQTANDSYAKALNATSLDQALQILKEEQPKDYFLQHHNLLNNAQKIFQRPPDPWTPLFPLSSFTNVPEEMQEWADAYFGVDAAARPLRYNSIIVEGDSRTGKTMWARSLGAHNYITGHLDFSPRTYYDEVEYNVIDDVDPTYLKMKHWKHLIGAQKEWQTNLKYGKPRVIKGGIPCIILCNPGPESSYQQFLEKPENEALKSWTLHNSTFCKLQGPLFNNQAAASSQGDSTL	Geminiviridae	-	0.52
KC898543	Hemidesmus yellow mosaic virus	MPRSGRFSINAKNYFLTYPRCSLTKEETIEQLRNLQYPTNLKYIKVCRELHENGEPHLHVLLQFEGKYNCTSDRFFDLSHPSCSASFHPNIQRAKSSSDVKAYIGKDGDTLDWGEFQVDDEICKRRPEICKRCIRLSNNAGSKQEALNIIKELMPKDYVLQYHNLHSNFDRIFTSAIPPYKSPFLSSSFDQVPDELEEWVSENVLPATARPERPISIVVEGDSRTGKTLWARSLGPHNYLCGHLDLSPRVFSNDAWYNVIDDVDPHYLKHFKEFMGAQRDWQSNTKYGKPIQVRGGIPTIFLCNPGPTSSYTEFLDEEKNKSLKAWAIKNARFITLFQPLFSGTNQSPTQPGQEEDLPQEEN	Geminiviridae	-	0.61
AY309241	Dolichos yellow mosaic virus	MRAPGFRISARNIFLTYPKCSLSKEEALEQLCRIECPSDKLFIRVAQEAHQDGTMHLHALVQFKGKAQFRNARHFDLTHPHSTQVFHGNVQGAKSSSDVKSYITKNGDYIDWGTFQIDGRSARGGRQTADDAVASALNSGTVQGALNIIKELLPHNYVFQYHNLRCNLERIFAPPIAVYTSYYKPADFSQVPSVMTDWAENNVVDPSWRSDPAARPRRPISIVVEGATRTGKTLWARSLGVHNYMCGHLDLSPKIFSNDAWYNVIDDVDPHYLKHFKEFMGAQMDWQSNIKYGKPTQIKGGIPTIFLCNPGPRSSYKEFLDEEQNESLKEWAYKNAVFVTLEQPLFSTEHQGTASAGEEAQNDSA	Geminiviridae	-	0.47
KT276896	Beet curly top virus	MVSTRCSTPFYKKAKNIFLTYPQCSVTKEDALEQLININTPSNKKYISICRELHENGEPHLHALIQFEGKVQIRNPRYFDMQHRSSSKQFHCNIQGAKSSSDVKSYVSKDGDHIDWGEFQVDGRSARGGQQTANDAAAEALNAGNALEALQIIREKLPEKYIFQYHNLKPNLEAIFLPPPDLYQPPFPLSSFTRVPEIIQEWADSYFGLDPAARPYRYNSIIIEGDSRTGKTMWARCLGPHNYITGHLDFSLKTYSDNVLYNVFDDVDPNYLKMKHWKHLIGAQREWQTNLKYGKPRVIKGGIPSIILCNPGEGSSYQDFLNKSENEALRSWTLQNSVFAKLTSPLFDNNQEASSQDQSSL	Geminiviridae	-	0.55
GU456685	Turnip curly top virus	MPRTPRQYRIHAKNIFLTYPHCHLTKEDALLQLQTIQCPSTKKFIRICRERHDNGEPHLHVLIQFEGKIQLYNPRHFDLRDGGSGRICHPNIQGAKSSSDVKSYIEKDGDYIDWGEFQIDARSARGGQQTANDACAEALNSGTAEAALAVIREKLPKDYIFQFHNLKPNLAAIFNPPPVGYVPKYNHTQFVLTDDILDWLESNFFLEESNSPAGPSKYKVIPSIDRPKSIIIEGPSRTGKTLWARSLGSHNYITGHLDFSTKVYNDDVSYNVIDDVDPHYLKMKHWKHLIGAQKEWQTNLKYGKPRIIKGGIPSIILCNPGDGASYQNFLDKPENEALKSWSLQNSVFTTIEEPLFNITSDQEVEDSTPTV	Geminiviridae	-	0.39
KC108902	Turnip curly top virus isolate IR:Hom:H9:Tur:12	MPRTPRQYRIHAKNIFLTYPHCHLSKEDALLQLQTIECPSTKKFIRISRELHENGEPHLHVLIQFEGKIQLYNPRHFDLRDRGSARVCHPNIQGAKSSSDVKSYIEKDGDYTDWGEFQIDPRSARGGQQTANDACAEALNSGTAEAALAVIREKLPKDYIFQFHNLKPNLAAIFNPPPVGYIPKYNHTQFVLTDDILDWLESNFFLEESISPAGPSQYKVIPTIDRPKSIIIEGPSRTGKTLWARSLGSHNYITGHLDFSTRIYNDDVTYNVIDDVDPQYLKMKHWKHLIGAQKEWQTNLKYGKPRIIKGGIPAIILCNPGEGASYQTFLDKPENEALKSWSLQNSIFTTIEEPLFNITSDQEVQDSTPSL	Geminiviridae	-	0.42
KT388076	Turnip leaf roll virus	MGRTNKQYRIQAKNIFLTFPHCTLSKDEALEQLQNLACPSNKKFIRISRELHENGEPHLHVLIQFEGKVQICNPRHFDLRHPSASRSFHPNIQGAKSSSDVKSYIEKDGDYLDWGQFQIDGRSARGGQQTVNDASAEALNAASAEAALAIIREKLPHDFLFKYHNLKPNLAAIFAPPPAVYTPPFTHTQFNIPEEIRQWVNNNFILEEASSPAGPTKHKRIPSIERPQSIIIEGPSRTGKTLWARSLGTHNYITGHLDFSARVYHDDVEYNVIDDVDPHYLKMKHWKHLIGAQKEWQTNLKYGKPRIIKGGVPSIILCNPGDGASYKDFLDKSENEALKSWTIQNSAFTTITEPLYDNENIEEAEDDPPTV	Geminiviridae	-	0.45
KT388078	Turnip leaf roll virus	MTPPKRFRVAAKNFFLTYPHCFLSPTEALEQLKQLQIPVNKKYIRIAKEHHDDKERTPHLHALLLLEGKFHGQNPRFFDLVSPNRSAHYHCNIQGAKSSSDVKTSSQKEGEYSDWGEFQIDGRSSRGGQQSANDAYAAAINTGSKQEALRVIKELAPKDYVLQYHNLNANLAAIFAPPPEIYQPPYTHNQFILPQDIQAWVDSNFTQEPATPPAGPTKHKRIPSIERPQSIIIEGPSRTGKTLWARSLGTHNYITGHLDFSARVYHDEVEYNVIDDVDPHYLKMKHWKHLIGAQKEWQTNLKYGKPRIIKGGVPSIILCNPGDGASYKDFLDKPENETLKSWTIQNSAFATITEPLYINENREEAEDSPPTV	Geminiviridae	-	0.39
DQ400847	Mungbean yellow mosaic India virus	MPREGRFAINAKNYFLTYPKCPLTKEDALEQLLALSTPVNKKFIRICRELHEDGQPHLHVLLQFEGKQQTKNQRFFDLHSRCRSAYYHPNIQAAKSCSDVKTYMEKDGDILDHGTFQIDGRSARGGQQSANDAYAEALNSGSKLEALLILKEKAPKDFILQFHNLNCNLSRIFTEPTQAYESPFTLESFDKVPSYISSWAERNVRDPAARPDRPISIVIEGDSRTGKTMWARAIGPHNYLCGHLDLNDKTYSNEAWYNVIDDVDPHYLKHFKEFMGAQRDWQSNVKYGKPTKIKGGIPTIFLCNPGPKSSYKSTWMKRTMLRLNSGLQRMRNSTPSKNHCSPPSIKVQHRVAKKRAIRRSRIDLKCGCSYYIHINCRNYGFSHRGEHHCSSTQEWRLYL…	Geminiviridae	-	0.63
JF451352	Tomato yellow leaf curl virus - KISR	MYFNEHWVLGINKTPETTDCHRALRDTDSYQHASAYLKYMPKNYFLTYPNCSLSKEEALSQLKNLATPTNKKYIKVCREFHENGEPHLHVLIQFEGKYQCKNQRFFDLSSPTRSAHFHPNIQAAKSATDVKTYVEKDGDFIDFGVFQIDGRSARGGQQSANDAYAEALNSGSKSEALNILKEKAPKDYILQFHNLSSNLDRIFSPPLQVYVSPFLLLLLIKSRELKKGSPEKPVSSAARPWRPISIVIEGDWHMQTGKTMWARSLGPHNYLCGHLDLSPKVYSNEAWYNVIDDVDPHYLKHFKEFMGAQRDWQSNTKYGKPIQIKGGIPTIFLCNPGPTSPFRGNLGRRKKYILEKLGSQECNLRHPLRATVRKYQSRSNTR	Geminiviridae	-	0.5
KF358470	Cotton chlorotic spot virus	MPRQPKELRVQSKNIFVTYPQCDIPKDEVLQMLQNLQWRVVKPTYIRVAREEHSDGNPHLHCLVQLSGKPNIKDVRFFDITHPRRSASFHPNVQPAKNSDAVKNYITKGGDFCESGQYKPYGGTKANKDDVYRNAVNSGTATEALDIIKDGDPKTFIVQYHNIRSNLDRIFKKAPEPWIPPYQLSSFVNVPDDMQEWADSFFGVDHAARPERPISIIIEGDSRTGKTMWARALGPHNYLSGHLDFNSRVYSNNAEYNVIDDINPQYLKMKHWKELIGAQKDWQSNCKYGKPVQIKGGIPSIVLCNPGEGSSYKDFLDKEENVALKNWTLHNAKFIFLNSPLYQDQTQASQEEGHSP	Geminiviridae	-	0.74
AY083351	Cotton leaf crumple virus - [TX]	MPRNPDSFRLQARNIFLTYPKCDIPKNEALQMLQALSWSVVSPTFIRVAREEHSDGSPHLHCLIQLSGKPNIKNERFFDLTHPRRSTNFHPNIHAAKDANAVKNYITKDGDCCESGQFEVPRGTKNNKDDVYYNAINAPSVAEALEIIRAGDPRAFIVSYHNIKANLDRLFKKAPEQWVPPFPLSSFTNVPDEMQEWADGYFGLGPAARPVRPVSLIVEGDSRTGKTMWARALGPHNYLSGHLDFNHRVYSNNVAYNVIDDVSPHYLKLKHWKELLGAQKDWQSNCKYGKPVQIKGGIPSIVLCNPGEGSSYKDFLDKAENASLKNWTIKNVIFITLDAPLYQEGTQASQEEGDQTTTN	Geminiviridae	-	0.71
HM163576	Melon chlorotic mosaic virus	MPRSPKSFRVAAKNIFLTYPQCDIPKDEALKMLQELAWTVVKPKYIRVAREEHSDGSPHLHCLIQLSGKSNIKNARFFDLTHPRRSACFHPNIQAAKDSNAVKNYITKEGDYCESGEYKVSGGTKSNKDDVFHNAINAGTAEEALAIIKAGDPKTFVVNYHNVKANIERLFQKDEDPWVPPFQLSSFNNVPQEMKDWVDENVTAARAACMTPAGPVRPRSIIIEGDSRTGKTMWARAIGPHNYLSGHLDFNARVYSNNVMYNVIDDVGPQYLKLKHWKELIGAQRDWQSNCKYGKPVKIKGGIPSIVLCNPGDGASYKAFLDKEENASLRAWTLKNANFVFLNAPLYQDEAQNSQEEGRS	Geminiviridae	-	0.67
U49907	Horseradish curly top virus	MPRQPNSFRIQARNIFLTYPQCTIPKDEMLQLLQNLNWTVVKPTYIRVAAERHADGTPHLHCLIQLSGKSNIKDCRFFDITHPQRSTSFHPNVQSAKDTNAVKNYITKEGDYCESGQYKVSGGTKANKDAVYHNAVNAGGVREALDIIKAGDPKTFVTQHHNVKANLEHIFAKPPEPWNPPYPLSSFTNVPEEMQEWADDYFGRPVADSHKAKSIIIEGNSRTGKTCWARALGTHNYLCGHLDFNMRVYSNEVEYNVIDDVAPTYLKMKHWKELIGAQRDWQSNCKYGKPVQIRGGVPTIILCNPGEGSSFRDFLDKPENDGLRQWTLYNAIFIFLDTPLFDNGIH	Geminiviridae	-	0.71
GU734126	Spinach severe curly top virus	MPRQNKSFRLSSKNIFLTYPQCDIPKDEVLQLLQNLPWSVVKPTYIRVASERHADGTPHLHCLIQLSGKSNIKDCRFFDITHPRRSANYHPNVQAAKDANAVHNYITKEGDYCESGQYKVSGSSKANKDDVYHNAVNSGGVKEALEIIKAGDPKTFVIQHHNVLANLERIFKKPQETWTPPFPLSSFNNVPDEMQEWADNYFGQPIESRPIRPKSLIIEGDSRTGKTCWARSLGKHNYLSGHLDFNPRVYSNEVEYNVIDDIAPSYLKLKHWKELIGAQHDWQSNCKYGKPVQIKGGIPSIILCNPGEGSSFKDFLDKDENESLKRWTLYNAVFISISEPLYNKDD	Geminiviridae	-	0.74
JQ821386	Jacquemontia mosaic Yucatan virus	MPRQPNKFRLASRNIFLTYPQCSLDKNHVLELLQNLPWTIVRPTYIRVAREIHSDGNPHLHILIQLSGKSNIKDERFFDISHPSRSTPFHPNIQAAKDTNAVKNYITKEGDYCESGQYKVSGATRTNKEDVYHNALHAESMAAAIAIIKAGDPVRWITQGHNIRSNLQFDFAKQKEPWTPKFPLSSFNNVPEEMQEWADDYFGRDSAARPLRPRSIIIEGDSRTGKTQWARTLGSHNYISGHLDFNSKTYSDDVEYNVIDDVAPNYLKMKHWKELIGAQTDWQSNCKYGKPREIKGGLPAIVLCNPGEGTSYKDFLDKEENAPLKRWTLQNATFIFLDSPLYQTQTQDCQIQGNTS	Geminiviridae	-	0.77
LN848759	Pepper golden mosaic virus	MPLPPKSFRLQCKNIFLTYPQCDIPKDEALEMLRSLKWSVVKPMYIRVSREEHSDGFPHLHCLIQLSGKCNIKDARFFDITHPRRSAQFHPNVQAAKDSNAVKNYVTKDGDYYEYGQCKFSGGAKHNKDDVYYKAVNAASAEEALDIIKEDDPKPFIVSYHNIKANIERIFTTPPKPWTPPYPLSSFNNVPEDMQQWVAEYFGGSSAARPDRPISIVMEGDSRSGKTMWARALGPHNYLSGHLDFNYKVYSNDVEYNVIDDLTPQYLKLKHWKELIGAQRDWQSNCKYGKPVQIKGGIPSTVLCNPGEGSRYIAFVNKEENASWIAWTQKNVHFVILHAPPYKSTAQDC	Geminiviridae	-	0.7
FJ665629	Eragrostis curvula streak virus	MASSSHRFRIQGRAFFLTYSQCPREPKDVGEFLTSHSTLASHVVYVRVQQEKHQDGNNHLHAIVCTSERRDIRDPRIFDFGEFHPKIETCRSVSKSLKYIQKEAGSFYEHGTVPCDKRLTGRKRKAEQDEWWHQAVNSGTIEEALQLVKDNEPRTFWLQHHNLVTNARRIWSEVRADFVPKYSESSFSVPRVLSDWVANNLRADPLPDRPLSLIIEGDSRTGKTAWARSLGSHNYLSGHLDLNGAVFDNEASYNVIDDVNPKYLKHWKEFLGAQKDWQSNLKYGKPVLVKGGKPAIVLCNSDQSYKSFLDCEENQHLRSWTSKNAVFVDIQDALFSGVSLTLREQTREDDPESPMWASDSDPGDQAV	Geminiviridae	-	0.4
FJ665634	Bean golden mosaic virus-[Brazil:SAdG 7:soybean:2008]	MASSSHRFRIQGRAFFLTYSQCPREPKDVGEFLTSHSTLASHVVYVRVQQEKHQDGNNHLHAIVCTSERRDIRDPRIFDFGEFHPKIETCRSVSKSLKYIQKEAGSFYEHGTVPCDKRLTGRKRKAEQDEWWHQAVNSGTIEEALQLVKDNEPRTFWLQHHNLVTNARRIWSEVRAEFVPKYSENSFSVPRVLSDWVTNNLRADPLPDRPLSLIIEGDSRTGKTAWARSLGRHNYLSGHLDLNGAVFDNEASYNVIDDVNPKYLKHWKEFLGAQKDWQSNLKYGKPVLVKGGKPAIVLCNSDQSYKSFLDCEENHQLRSWTSKNALFVDIQDPLFRGVSLTLREQTREDDPESPMWASDSDPGDQAV	Geminiviridae	-	0.37
JX458740	Dragonfly-associated mastrevirus	MSSSSAQSGPSHFRIRAQNIFLTYPRCDLDPKDAGEIIQSKMQSHEPKYILFSRELHSDGEYHLHGLLQLSRQFSSNNPRIFDIGAHHPNIQSAISPKSVRDYILKNPITQFCIGTYVPAKKGRKLGSRFEENIRNNIMRSIISTATSKESYLSMVRKSFPFEWATKLSQFEYSASKLFPEVTPEYKSPFPTESLICNENIQDWVDNTLYQPNRTSRGLSLYICGPTRTGKTSWARSLGVHNYWQNNIDFSVYNDNATYNVIDDIPFKFCPCWKALAGSQSDFTVNPKYGKKKRIKGGIPCIILVNEDEDWLTCMSSSQKTYFESNVVIYYMYAGEKFFNFVEE	Geminiviridae	-	0.77
GU734126	Sporobolus striate mosaic virus 2	MSSQSNSTEASPANFRFRARSAFLTYPKCTLEPRDVVEHLYSKFRKYGPKYCLVTREHHSDGDYHLHCLFQLDKAFSTNDSSTFNILDYHPNIQTAKSPTNVRDYCLKNPVSKAERGTFIPLKGRTPKNTESKAKDSVMRSIINTSTDRASYLSMVRKAFPFDWATKLQQFEYSASKLFPDVIPEYTSPFPTENLMCNERITDWLDNTLYQSADHPRTRKSGLYICGPNRTGKTSWARSLGKHNYWQMNLDFANYNNEAQYNVIDDIPFKFCPYWKALVGSQHEYTVNPKYGKKKLIKGGIPSIILVNEDDDWMRAMNDGQRSYFEGNMSIYYMSEGESFIRNEAL	Geminiviridae	-	0.71
KF806702	Switchgrass mosaic-associated virus	MSSGPYASFSEDSNEGGPPPEHRERISTFRFDASEIFLTYPRCPVDPMDVGNYLWTMLLTLSPKYVLCTRERHADGSFHLHAFVQLGYNLITANPHHFDYKQYHPNVQPVRSSKSVRDYCLKNPISQYSRGRYTVGRGIRNGNSSRVGESSSDWESKNAKMATIFATATDRASYLGMIKTTFPFEWATKLQAFEYSASKLFPEVEPEYETPNWAVSLRCPEAIADWANHNVFQPNDGTRRKSLYICGPTRTGKTTWARSLGTHNYYNNNIDFTNYRDRAFYNVIDDIPFKFCPCWKSLVGCQKDYIVNPKYGKKKKIAGGIPSIIIVNEDDDWLPKMTAAQRSYFEANCEVHYLYEGDSFFATPDQAAPDL	Geminiviridae	-	0.77
JQ948051	Sporobolus striate mosaic virus 1	MSGPSRPPSPFAISSSDEESVDGFHFRGKNIFLTYSRCEIDPALITDALWDKFSSHKPLYILSVRELHQDSGFHVHCLVQLTDQYRSRDSSFADLGGNHPNIQTVRSATKVKEYILKEPVSQSARGKFVAPGGRPPKHTDRRRSDSAVKDERMRYILRTATTRDDYLGMVRKSFPFEWATRLAQFEYSASKLFPDITPQYQSQYQTTDLTCHENLLDWYQENLQCYIDGAGRRKSLYICGPTRTGKKSWARVLGRHNYYNMQVDWATYDQEAQYNVIDDIPFKFCPHWKALIGCQKDFTVNPKYGKKKLIKGGIPTIILVNEDEDWLADMTPGQVSYFEANVQIHYMTSEESFIPDPALRQRLSLNYYKVCFFLM	Geminiviridae	-	0.84
AF329882	Maize streak virus - A[MatB]	MASSSSNRQFSHRNANTFLTYPKCPENPEIACQMIWELVVRWIPKYILCAREAHKDGSLHLHALLQTEKPVRISDSRFFDINGFHPNIQSAKSVNRVRDYILKEPLAMFERGTFIPRKSPFLGKSDSEVKEKKPSKDEIMRDIISHSTSKEEYLSMIQKELPYDWSTKLQYFEYSANKLFPEIQEEFTNPHPQSSPDLLCNESINDWLQPNIFQSSDERSRKQSLYIVGPTRTGKSTWARSLGVHNYWQNNVDWSSYNEDAIYNIVDDIPFKFCPCWKQLVGCQRDFIVNPKYGKKKKVQKKSKPTIILANSDEDWMKEMTPGQLEYFEANCVIYIMSPGEKWYSPPELPPTEAVHSDRS	Geminiviridae	-	0.76
AF003952	Maize streak virus - A[Kom]	MASSSSNRQFSHRNANTFLTYPKCPENPEIACQMIWELVVRWIPKYILCAREAHKDGSLHLHALLQPEKPIRISDSRFFDINGFHPNIQSAKSVNRVRDYILKEPLAVFERGTFIPRKSPFLGKSDSEVKEKKPSKDEIMRDIISHATSKEEYLSMIQKELPFDWSTKLQYFEYSANKLFPEIQEEFTNPHPPSSPDLLCNESINDWLQPNIFQSSDERSRKQSLYIVGPTRTGKSTWARSLGVHNYWQNNVDWSSYNEDAIYNIVDDIPFKFCPCWKQLVGCQRDFIVNPKYGKKKKVQKKSKPTIILANSDEDWMKEMTPGQLEYFEANCVIYIMSPGEKWYSPPVLPPTEEV	Geminiviridae	-	0.74
KJ437668	Sugarcane streak Reunion virus	MPSQEQATVATRPFKHRNANTFLTYSRCNLDPEAVGLHLWELIGHWNPAYILVSREAHADGEWHLHALAQSVKPVHTTNQGFFDIEGFHPNIQSAKSANKVREYILKNPVCQWEKGTFIPRKQSFVTSSSESKNSKPSKDDIVRDIIEHSTSREEYLSMLQKALPYEWATKLQYLEYSASKLFPDTVEEYTNPHPPTTPLLREPTTIDNWVQSNLFQNNTGTRKLSLYILGPTRTGKSTWARSLGRHNYWQNNVDWSCYDEDSVYNVIDDIPFKFCPCWKQLIGCQKDYVVNPKYGKKRRVAKTSIPSIILANEDEDWLKVMSPGQLDYFHQNCVVYIMEEGERFFGGELVSATAHPSNEV	Geminiviridae	-	0.66
Q80GM6	Sugarcane streak virus - [Natal]	MSTVGSTVSSTPSRRFKHRNVNTFLTYSRCPLEPEAVGLHIWSLIAHWTPVYVLSVRETHEDGGYHIHVLAQSAKPVYTTDSGFFDIDGFHPNIQSAKSANKVRAYAMKNPVTYWERGTFIPRKTSFLGDSTEPNSKKQSKDDIVRDIIEHSTNKQEYLSMIQKALPYEWATKLQYFEYSANKLFPDIQEIYTSPFPQSTPALLDPTAINTWLENNLYQQNSNSNRKLSLYILGPTRTGKSSWARSLGRHNYWQNNVDWSSYDEDAEYNIIDDIPFKYCPCWKQLIGCQKDYIVNPKYGKRKKVASKSIPTIVLANEDEDWLRDMTPAQQDYFNANCETYMLEPGERFFSLPAVSATAHPSSEV	Geminiviridae	-	0.66
KJ437665	Urochloa streak virus	MATVGSSSNSVASRSFKHRNANTYLTYPKCPLEPEAIGLTLWSLIAPWEPAYIIVCREAHQDGTWHCHALAQSVKPVTTRNSRFFDIEDHHPNIQSAKSVDKVRAYILKDPIALWERGTFIPRKKSFVPNQGDEHTPKPTKDDIVRDIIEHSTSKQEYLSRLQNELPYEWATKLQYFEYSANKLFPDIPEPYIHPHPQTEPELHCKETIDDWLKPNIFQQLPSDRKQSLYIVGPTRTGKSTWARSLGRHNYWQNNVDWTSYDEEAMYNIVDDIPFKYCPCWKQLIGCQKEYIVNPKYGKRKKVASRSIPTIVLANEDEDWLKDMTPAQREYFEANCVIYIMTPGEKWFSPV	Geminiviridae	-	0.66
GQ273988	Saccharum streak virus	MAYANSTSTESNSSRSFRHRNANTFLTYSKCSLDPEILGLSLWSKLAPWTPAYILVAREAHQDGTWHCHALAQSVRPVTTSDPRFFDVNEYHPNIQSAKSVDRVREYILKDPLCQWEKGTFVPRKKPFVPQIGESSNTRASKDDIVRDIIQHSTNKHEYLSMLQKELPYEWATKLQYFEYSANKLFPEIAEPYTNPHPPTQPDLHCYERIEEWLNFNVYQVQPQEAGRARSLYIVGPTRTGKSTWARSLGRHNYWQNNVDWSSYDEEAVLNVIDDIPFKYCPCWKQLVGCQKNYVVNPKYGKKKKVAKRSIPAVILANEDEDWLRDMTPAQRDYMEANCEVYIMSSGEKWFTPA	Geminiviridae	-	0.74
P0C647	Panicum streak virus - [Kenya]	MSTVGSSSEGRHSVRCFRHRNANTFLTYSKCPLEPEFIGEHLFRLTREYEPAYILVVRETHTDGTWHCHALLQCIKPCTTRDERYFDIDRYHGNIQSAKSTDKVREYILKDPKDKWEKGTYIPRKKSFVPPGKEPAEKKPTKDEVMREIMTHATSREEYLSLVQSSLPYDWATKLNYFEYSASRLFPDIAEPYTNPHPTTEYDLHCNETIEDWLKPNIYQQNAPGERKRSLYICGPTRTGKTSWARSLGRHNYWQNNIDWSSYDEEAQYNVVDDIPFKFCPCRKRLVGCQKDYIVNPKYGKRRKVASKSIPTIILANEDEDWLKDMTPAHVEYFEANCDQYILLPGEKFYKTGEAGGSI	Geminiviridae	-	0.74
KJ437669	Maize streak Reunion virus	MSAFGNHFVPTPFVQAEVPTPLPGSDYPSEEDDLLQHDTPVGPDPPRRNFQFKSANAFLTYPRCLLTPFEAGQHLWEVARPWTPSYILASSESHQDGTPHLHVLLQTIRPMSTRDPGFFDIQGYHPNIQASRSPNKTREYILKSPITVYSRGTFIPRAGTSGAGYGSTPVPKRNEIMRGIIETTTSKAEYLSEVQKAFPFEWATKLQQFEYSAERLFPTLPSPFVPPHPPSEPDLNCYETIRSWKDENIFQGDAASRTSRPRSLYIVGPTRTGKTTWARSIDPVNHNYWQNGVDFLKYRKSAKYNVLDDIPFKFCPCWKQLVGGQKDYTVNPKYARRMEVPGGIPSIILVNYDEDWLKVMTPAQLEYFYDNCVVYQMELHEKFYTPS	Geminiviridae	-	0.77
JQ361910	Wheat dwarf India virus	MSQTSAENNSANPKASSSTFRYRSNNCFLTFPHCNSCPYGMVQHFWDLISTWSPIYAVASVELHQDGTPHLHALLQTRKQISTNDPHFFDFDGHHPHIQAAKNPTLCRDYILKGPITFSEKGAFIPRGRNAGTSPRHSNKRSRDDIMKDIIENSTNKSDYLSKVRRNFPYDWATKLYNFEYSASKLFPEQQPEYSNPHGQSVPDLYCYETIQDWIDSNLFQVHPYCYMLNTPTYIVGPTRTGKSTWARSLGRHNYWQNNVDFTVYDPEAAYNIIDDIPFKFCPCWKQLVAAQRDFTVNPKYGKKKLIKGGIPSIILVNSDEDWLKTMTPEQQEYFEANSIIYMMEPTEKFFGGAEIV	Geminiviridae	-	0.77
KJ210622	Sugarcane white streak virus	MSTDSSNQGIAAQRLSPGLEEFTTSWPDPRAGSTSQPRVFQFKAQNIFLTYPRCDISVDVAARTLLTLCHRFQPLYILCSQEHHADGSNHLHILLQTDKTMYTRNPHYFDICGHHPNIQPAKSPDNVRAYILKDPITSFEEGSFQPRGSRSNTSAIPRSGNSGTKDSLMRDIINTSTSKDDYLTRVRNTFPFDWATRLQQFEYSASKLFPEPVREYVNPFPPSEPDLFCREIIDRWVYDELDMDITDAFDAAQRRRSLYIVGPTRTGKSTWARSLGRHNYWQHMVDFTAYDTLAKYNILDDVPFKFCPNWKQLVGCQRDFIVNPKYAKRKEIPGGIPCIILQNPDDDWLPVLSPSQMDYFVNNCDVYVMKPGEKFFGGDTPVPEAQEDVPDGTGSS	Geminiviridae	-	0.71
HM122238	Digitaria didactyla striate mosaic virus	MSSQLVSDSVMFDPRSYGEYPSSESAASLPLSFNVRSQHVFLTYPRCPIPPKDAGSFLKKLCKRYNIQYMYIAQELHQDGEPHLHAFLQFDKVFRTTSAKYFDFFEFHPNIQAARNPEKTLEYCQKNPADFYEDGVFVKPKASRKRKLASFTRDKKMKQIMANATSRDEYLSMIRKAFPFDWAIRLQQFEYSAKALFPEAPIQYQPQFVSNDMSDHPVIGEWLDTEFFTQERGPHHRRRSLYICGPTRTGKTSWARSLGTHHYWQHSVDFLTEWNKNAIYNVIDDIPFKFVPCWKGLVGSQFDITVNPKYGKKKTIPNGIPSIILANEDEDWLQTMSPQQADWFHGNCVVYYLQAGESFIPPSSDVEA	Geminiviridae	-	0.77
JQ948053	Chloris striate mosaic virus	MSSLPVSESEGEGSGTSVQVPSRGGQVTPGEKAFSLRTKHVFLTYARCPISPEEAGQKIADRLKNKKCNYIYISREFHADGEPHLHAFVQLEANFRTTSPKYFDLGEFHPNIQAARQPASTLKYCMKHPESSWEFGKFLKPKVNRSPTQSASRDKTMKQIMANATNRDEYLSMVRKSFPFEWAVRLQQFQYSANALFPDPPQTYSAPYASRDMSDHPVIGEWLQQELYTVRSPGVRRRSLYICGPIRTGKTTWARSLGTHHYWQHSVNFLEEWNCQAQFNIIDDIPFKFVPCWKGLVGSQYDLTVNPKYGKKKRIPNGIPCIILVNEDEDWLTSMSTQQVDWFHGNAVVYHLLPGETFIPSE	Geminiviridae	-	0.77
JQ948069	Paspalum striate mosaic virus	MSSPVSERVYSEVGSQMESPGRGGQSIDAPSSSCFKVRARNLFLTYSKCNLTAVFLLEYISSLLKKYCPTYIYVAQEAHKDGSHHLHCIIQCSKYVRTTSAKFFDVGEFHPNVQNPRMPKKALAYCKKSPISDAEYGVFQEIKRPRKKKVDAPSTKDAKMADIIKSSTNKEDYLSMVKKSFPFDWATRLQQFQYSAESLFPSTPPPYVDPFGMPSQDEHPVIGAWLRDELYTDRSPAERRRSLYICGPIRTGKTSWARSLGSHNYWQHSVDFLHVVQNAKYNVIDDIPFKFVPCWKGLVGSQKDITVNPKYGKKRLLSNGIPCIILVNEDEDWLQQMQPNQAEWFNANAVVHYMYSGESFFEAGPATA	Geminiviridae	-	0.8
HQ113104	Bromus catharticus striate mosaic virus	MASFVSETSDARGQTGAPRSPSGEVGAPGAVAACFEVRSRNIFLTYSKCHLDPVFMQEHLSSLLRRFEPTYVYVAREEHQDGSYHLHCLVQCKKYVRTKSAKFFDVEEFHPNVQNARMPHKVLAYIKKNPLCFVETGVFQASTKQKKKKVDAPSTKDAKMAEIIKSSTCKEDYLSMVRNTFPFDWATRLQQFQYSAESLFPSVPTPYMDPFGMPAQDEHPVIGAWLQAELFSRRPDERRRSLYICGPTRTGKTSWARSLGAHNYWQHSVDFLNLVANATYNVIDDIPFKFVPCWKGLVGCQFDITVNPKYGKRRMLKNGVPSIILVNEDEDWLKQMQPSQVGWFETNCIIHYMYAGESFFEA	Geminiviridae	-	0.77
JQ948061	Paspalum dilatatum striate mosaic virus	MASHVSETEGARGQVGAPPLRGEEVGAPGAVEACFEVRSRNVFLTYSKCHLEPAYMLERLSRLLKKWDPTYTYVAREEHKDGSYHLHCLVQCRKYIRTKSAKFFDVEEFHPNVQNARVPHKVLAYIKKGPVCFVEHGAFKDEAKKKKRKADAPSTKDAKMASIISQSTSREDYLGMVKKEFPFDWATRLQQFEYSAQALFPCLPPPYVDPFGMPSQAEHQVLGAWLREELYSQDRSPAERRRSLYICGPTRTGKTSWARSLGCHNYWQHSVDFLHVIPTARYNVIDDIPFKFVPCWKGLVGAQRDITVNPKYGKKRLLPNGIPSIILVNEDEDWPQYMQPSQAAWFEDNCVVFYMNQGFRFFETTA	Geminiviridae	-	0.77
JQ948088	Digitaria ciliaris striate mosaic virus	MAPPVSDTESANSANCRLAERAPGAAEASFEVRAKNIFLTYSKCLLDPQEALRDITHKLRKFEPTYVYVARELHQDGTFHLHCFVQCKKHVRTTRARFFDLEEYHPNVQNARMPHKVLAYCKKSPVSYAEEGAYTESDVRKRKIDASTTKDAKMADIIRSSKSKEEYLSMVRKTFPFDWATRLQNFEYSAERLFPSTPPPYVSPFNMPSQEEHPVLGAWLRAELYTQGRNPAERRKSLYICGPTRTGKTSWARSLGKHNYWQHSVDFLNIIPDAEYNVIDDIPFKFVPCWKGLVGAQRDITVNPKYGKKRLLSNGVPCIILANEDEDWLQQMQPGQADWFNANCEVHYMYQGETFFKSLGAATA	Geminiviridae	-	0.74
KJ437671	Axonopus compressus streak virus	MNNTEHGGPSGFRFQSRNIFLTYPRCNLAPELIGSFLLSLLSPYHVMFITVTSELHKDGTPHIHALAQTDKRVHTYSPGFFDVQGFHPNIQSARSPQTVLSYILKSPTGTFNYGSLRPRGTRADAACGIGEDTAGGGASSSSSPPQADQRRGSRSRELANDPGRDRKDVLMTSILAGSSSKQEFLNGVKKAFPYDFCARLQNWEYAANKLFDTPAVYQPPFPDSYFHCHENIHDWVRDNIYEITPEARPLSLYICGPTRTGKSTWARSLGRHNYWQNNVDFTSYDVEAKYNVIDDIPFKYCPCWKALIGGQKDFTVNPKYGKKKLIKGGIPSIVIVNDDEDWMRAMTASQRSYFERNCVVVYLYEGDSFIKDDVSSTSEECI	Geminiviridae	-	0.75
DQ458791	Chickpea chlorotic dwarf virus	MPSASKNFRLQSKYVFLTYPKCSSQRDDLFQFLWEKLTPFLIFFLGVASELHQDGTTHYHALLQLDKKPCIRDPSFFDFEGNHPNIQPARNSKQVLDYISKDGDIKTRGDFRDHKVSPRKSDARWRTIIQTATSKEEYLDMIKEEFPHEWATKLQWLEYSANKLFPPQPEPYVSPFTESDLRCHEDLHSWRETHLYHDNGRNGIRHPSLYICGPTRTGKTTWARSLGRHNYWNGTIDFTNYDEHATYNIIDDIPFKFVPLWKQLIGCQSDFTVNPKYGKKKKIKGGIPSIILCNPDEDWMLSMTSQQKDYFKDNCVTHYMCDGETFFARESSSH	Geminiviridae	-	0.78
KF147918	Grapevine red blotch virus	MASSSSFNLRSKNFFLTYPQCPVHKQFALDLFKSKFSKTLDYALISEEKHQDGEPHLHALLIFKKRQTVRNPKHFDITISSHSYHPNITKPRDVTDVLNYVGKDGDTVEYGTKPVLKSKRQSRELDLGEFLRVANSKEEFLQLVREHYPYQYVLNLQRLEYFANQTWPPAPAPNANQWTAWNNLPPEIHLWVQNELYVDQTHRRRKSLVIEGPSKTGKTQWAMSLGKHNYWCESVDFSLYIDDALYNIIDDIPFQYLPCKKALLGCQSNYIANEKYRPKRKIKGGIPSIVLCNPDQSYYDAITNWNASFKPWAEDNIIFVKIDRPLY	Geminiviridae	und|Geminiviridae(geminilike)	0.16
KT214373	Alfalfa leaf curl virus isolate VAU14_LUZ142	MPRRASNFRLQGKSIFLTYPQCPLIPMFLIDYLYQLLKNWDPTYARVCREEHQSREPHLHCLVQRDKKIDIKDPRFFDIKDPNGVSTYHPNTQIPRRDADVADYISKGGVFEERGLLRASRRSPKKSRDSIWTTILTESTSKSEFLSRCRTEQPYTYATQLRNLEYMASREWPEPPTVYQPRWTHFPSVPESIKQWADENIFTDQKPDRPLTLIIEGPSKTGKTAWARSLGRHNYFCGGVDFSFWDNHASYNVIDDIPFQFLPCKKELLGSQRDFTVNEKYRKKTRVPGGIPTIVLCNPDQSYKTALSSSDMYEWE	Geminiviridae	-	0.31
JX094280	French bean severe leaf curl virus isolate FbSLSV-1	MPRRNNNSFRLQGKSIFLTYPKCPLTPLFVIDYLYQLLKNFNPIYARVCTENHQDGEPHLHCLVQLDKRFNTTSQRYFDISDPNRTGVYHPNCQVPRRDADVADYIAKGGQFEERGILRASRRSPKKSRDSIWTNIINESTSKSEFLGRVQIEQPYVWATQLRNLEYAANSKWPEQPSVYIPKWTVFNNVPEPIREWADTNLFTVSPTKTGKTAWARSMGLHNYFCGGVDFSVWNNFATYTVIDDIPFQFLPCKKELLGCQKDFTVNEKYRKKCRIPTIVLCNPDQSYKAALMGSEMYEWSLSNVIHVEIKDPFF	Geminiviridae	-	0.33
KM598389	Odonata-associated circular virus-6	MPASNFAFDGSHVFLTYPQCGSLSKERVRDFLLVELGVRRFLVASELHGDGQPHIHAYAAWDSRRRLVGAGCFDVDGHHPNIQKPRSAKAVAEYCGKHDTEALRNFENAELESNRGNTGWRSILRECPDAKTFLARVEEHYPRDLCLSLDRLLQFCEWRWGTERIGYSGRTRELFLEPDQLREWVRLSLEVLLYPLMPIVLVLSGGGPQSPPQPLWRKANCLCAGYKGGERPISLLLVGASKLGKTEWARSLGPHMYFCGQFNLDDWNDEAKYIVLDDFNIKFFPQWKSFFGAQKQFVLTDKYRKKRTVKWGRPLIWLCNRDADPRGALSGAELEWLQINAMMVDLFTPLFTQ	unclassified	-	0.52
KJ547627	Sewage-associated circular DNA virus-3 isolat SaCV-3_NZ-BS3854-2012	MVYTFSFTYPQCSLERTELRDSLIQRVNPEKYLIAREQHSDGGLHLHAYLHFGRRRRFTSADAFDVDGFHPNIQKPRSARNVIAYCSKEDTEPMANFDYTSGEPNGGWSEILGRTSSKDEFLEEVRTHFPRDYVLSLERLLFFCEWRFGRDETEYTGRSRTEFREPDTLTNWVNTNLLQVCIWTYGPRGGPQSPPLLSSPCLYWLIWTQWARSIDSTHVYCQGMFNLDEWNDKAKYVIFDDIDIKYFPHWKSILGCQRDIQLTDKYRKKRRLRNGLPCVWLCNEDMDPRGALSRTQCEWIESNCDVVTLREPLFE	unclassified	-	0.43
KM821749	Sewage-associated circular DNA virus-37 isolat SaCV-37_NZ-BS2945-2012	MPFRVSAKSFIITYPRCDVDKEVILQWFQDHFMLLGCRVARELHADGTPHIHVVFHIANTFQTRNARYFDIGDHHPNVQSTRGLPASYAYVAKDGDYIDFGTIPATRPHGSWADIANATTKEEALALVKETSPRDYVLNYDKIISFCESHFANRTEAYVPIYQNFNGLPQQLTTWCDQRLEVSERHSPPPAAGLPPQPPTEWGELLYIVTNQSLGHHMYFNAMFDLGEWDDGAQYAIFDDWADWSKFYAYKQFLGAQRQFTITDKYRRKRTVRWGKPAIVISNLRPAWEDEDWITVNCFQCHLLGALF	unclassified	und|und(genomolike)	0.1
KP153394	Lake Sarah-associated circular virus-2	MQINAKSFFLTYPRCAITAETFQLWLESTFTPTYLVIGSELHQDGTPHVHVCFTLDTALRTRDERVFDFHGHHPNIVRPRAIKKCIDYVKKDGNFIESGEPPAMKRKWSELQTATTSEEFFKTALEISPRDYYLNQERLEYMARKLFKPVVPTYVPQWVDFNIPQELSDWIDQRHEVCYRPQSLILYGASRTGKTEWARSLGPHVYFNGYFMLDLIRDDVEYAIFDDFEDWTTFKQYKQWLGAQKQFVCTDKYRKKVDLLWGKPCIILSNEYPAFRDQDWILLNCITVKLNKPLY	unclassified	und|und(genomolike)	0.1
KJ547628	Sewage-associated circular DNA virus-4 isolat SaCV-4_NZ-BS3799-2012	MARFHAKTVFLTYPQCPVNKEDLLAWLQTLRNPIYTIVSHELHEDGSPHLHAVVCWQNKLDIRDTTFFNYENYHPNIQSARSIKKVIAYTKKDGDFIEAGDSPIVDTANTWSTAMDTATTIKEFMDTVKESNPRDYILQHERLEYFAAKHFKKDTEVYKPNFEEFILPHEVEAWLNEEFNSDKLRKKSLILIGPSKLGKTEWARSLGPHMYFNHLANFKDDWDDEAKYIVFDDFDFDFIPNKKGFFGGQQHFQITGKYMRVKSVRWGKCCIYCANVTPNIKDIDKDWYNENCVFIDVVNKFY	unclassified	und|und(genomolike)	0.15
KJ547626	Sewage-associated circular DNA virus-2 isolat SaCV-2_NZ-BS4000-2012	MTRFAAKQFFLTYPRCDLDLQLLLDGLTTALAPRLFRHKIVQERHGDEGLHVHAIIVCAERIDTSNPRFFDVAGFHPNIQTVRNLRQAYTYLDKEPVQALCNLDEPIPKMSWGELLEKATDAVEFMNLMKKYHPRDYILSFTRLLDFAEVHFTEPPPLYETPEGYSFLTYRPKSLVLIGPSRTGKTTWARSLGRHVYWNSLVNLDVWSPLADYIIFDDVDIDFLPGYKCWLGAQKEFTVTDKYKKKRKIMWGKPCIWLCIDDKDPLLSSKVYRDWISMNCVFVTVINKMY	unclassified	-	0.34
KJ547634	Sewage-associated gemycircularvirus-4 isolate BS3913	MPRFQARAKAFIVTFPQVSEDVQQRFDHEGASLLLNITQDLKDPSCFRLGRERHQDGGVHYHMYIGFDEVVHINRANLFDYFGAHGNIKSVRRTPRTVYDYCGKDGDVRYERGDPPESVSRSRGENGEKWHTICDAPDKDTFLSLCRQLAPKDWLLSNSRILEYANTYYPEIPSPYEGPPIIAEMERYPELERWLEQARIGDDRPERVKSLILYGPSRTGKTLFARSLGEHAYFNLQFNMDGFSDGVKYAVFDDIQGGFEFWHSYKGWLGAQKEFVITDKYRKKRTIKWGKPTIMCLNENPNFLKGVDYEWLQLNCVIIEVLDPICHLSS	Genomoviridae	-	0.76
KJ547636	Sewage-associated gemycircularvirus 6	MSSFSFHARYALLTYAQCGDLCPFTIVDLLSTMGAECIIGREHHQDGGIHLHVFVDFGRKYRSRRADTFDVGGFHPNISQSYGTPEKGYDYACKDGDVVAGGLDRPVPTEGRGGDSKTHSIWSQITSATTRESFWDLVHDLDPKSAVTCFTQLQKYCDWKYRYCPPAYESPAGARFRNDTSDGRGDWLLQSGIGGARVGRVKSLVLYGPSQTGKTTWARSLGAHIYQVGLLSGSECMKAPDVEYAVFDDIRGGMKFFPSFKEWLGCQPHVCVKELYREPRVIEWGKPAIWCSNADPRDDMSYCDVQWMEANCTFIEITEKLLDWE	Genomoviridae	-	0.97
GQ365709	Sclerotinia sclerotiorum hypovirulence associated DNA virus 1	MTFDFHAKYVLLTYAQCGELDAFRVMDKLSLLGAECIIGREHHEDGGTHLHCFAEFGRKFRSRKADVFDVDGHHPNITKSRGTPEKGYDYAIKDGDVICGGLGRPSVGRVGTRPSDSKWAIITSASNRDEFWELVHELDPKAAATSFSQLQRYCDWKYQYHAPEYESPAGAHFIGAELDGRNRWLEQSGIGSSEERRGRVKSLVLYGPSQTGKTSWARSLGKHIYCVGLVSGTECLKAPDVEYAVFDDIRGGIKFFHSFKEWLGCQPHLSVKELYREPKVIEWGKPSIWCSNADPRNELLQVDIDWMEMNCTFIEITEPVVEFN	Genomoviridae	-	0.97
KT862253	Faeces associated gemycircularvirus 22	MPFHFGARYALITYAQCNALDGFRVMDHFSGLGAECIVGREVHADGGIHLHCFIDFGRKFRSRRTDIFDVDGRHPNIAPSYGTPWRGYDYAIKDGDVICGGLERPEEPRSKRVTKDWDPWTEITNARDREHFWELVHHLDPKAAACNYGQLAKYADWRFAAKPPVYESPGGIEFVGGDVDGRDAWCDQSGIRSGDPLIGRCMSLVLYGDSRVGKTLWARSLGAHVYTVGMVSGGELKKVADDTVKYAVFDDIRGGIKFFPAFKEWLGAQAYVTIKELYREPALVRWGRPSVWISNDDPRLVMEASDVSWLEANCIFVEITEAIFRAKR	Genomoviridae	-	0.97
JQ412056	Cassava associated gemycircularvirus 1	MPFYFNARYALITYAQCDALDGFRVMDHFSGLGAECIIAREIHQDGGVHLHCFIDFGRKFRSRRTDIFDVDGRHPNIEPSWGTPWRGYDYAIKDGDVICGGLERPEQPRSERVKKDWDQWAEITNARDRDHFWELVHHLDPKAAACNYGQLAKYADWRFASVPPVYESPGGISFIGGDVDGRDAWCEQSHIRSGQPLPGRCMSLVLYGDSRTGKTLWARSLGTHLYTVGMVSGEELKKASNDDVKYAIFDDIRGGIKFFPAFKEWLGAQAYVTVKELYREPKLVKWGKPSIWISNDDPRLGMDASDVSWLEHNCYFVEVSSPIFRANTE	Genomoviridae	-	0.97
KJ547637	Sewage-associated gemycircularvirus-7a	MSHDGDTYDLYARHNPTSLPPRSFNIHCRYVLLTYAQCGGLSADAVGERMASSGYKCVIGREDHADGGVHLHVFVDFGIKRRFRRANIFDVDGCHPNISPSSGTPEKGYDYAIKDGDVVFRSLDRPSAAGAGKSVDKWARITGAVDRESFWSLVHELDPKSAACNFTSLQKYVDWKFAAVPPVYESPAGISFRGGDVDGRDQWLLQSGIGLGQPLIGICMSICVYGESRTGKTLWARSLGPHIYCVGLVSGDECMKAQDAEYAVFDDIRGGIKFFPSFKEWLGCQAWVTVKCLYREPKLVKWGKPSIWLSNTDPRDHMENSDIDWMNKNCIFVEVNSAIFHASTE	Genomoviridae	-	0.97
KJ547639	Sewage-associated gemycircularvirus 9	MPFNLHCRYALLTYAQCGDLSPTAVGEFFDNLGYKSVIGRENHADGGVHLHCFVDFGRKRRFRRARVFDIENRHPNVEPSRGTPEKGWDYAVKDGDICYQSLDRPRESSPSGGSNGGTRDKWASITGASDREAFWDLVHELDPKSAACCFTQLQKYCDWKFAPRTPEYESPGGLEFIGGGLDGRDDWLLQSGIGGREAFVGELVCRRCMSICVYGESRTGKTLWARSLGPHIYCVGLVSGDECMKASTADYAVFDDIRGGIKFFPSFKEWLGCQAWVSVKCLYREPKLVKWGKPSIWLSNTDPRDYMENSDIDWMNKNCIFVEVNSPIFRANTE	Genomoviridae	-	0.97
KJ547638	Sewage derived gemycircularvirus 1 isolate BS3917	MPNFDIHCRYALITYAQCGDLAGPTVGEFFESSGYKSVIGRENHADGGVHLHCFVDFGRKRRFRRPRVFDIEGRHPNIEPSRGTPEKGWDYAVKDDDIVFQSLDRPGESGGSNGGTRDKWVAITGASSRESFWDLVHELDPKSAACSFTQLQKYCDWKFAPIPPVYESPGGISFTGGDVDGRDDWLSQSGIGSGEPLVGRCMSICVYGESRTGKTLWARSLGPHIYCVGLVSGDECMKANDAEYAVFDDIRGGIKFFPSFKEWLGCQAWVSVKCLYREPKLVKWGKPSIWLSNTDPRDYMENSDIDWMNKNCIFVEVNSAIFHANIE	Genomoviridae	-	0.97
KJ547640	Sewage-associated gemycircularvirus-7b	MPPRARRTRQDGAFDIHSRYALLTYSQCGDLSPATVGEFFTNLGFKLIIGRENHANGGIHLHCFVDFIRKRRFRAPRCFDIEGRHPNVEPSHGTPERGWDYVIKDGDVVFKSLDRPVEEHVAPRNSSRSHDSWSTITGASDRESFWDLVHELDPKSAACSFTQLQKYCDWKFAPSPPVYGSPDGITFVGGETDGRDDWLLQSGIGNREPFIGRCMSICVYGESRTGKTLWARSLGSHIYCVGLVSGDECMKAETVDYAVFDDVRGGIKFFPSFKEWLGCQAWVTVKCLYREPKLVKWGKPSIWLSNTDPRDHMENSDIDWMNKNCIFVEVNSPIFRANTE	Genomoviridae	-	0.97
KT862245	Faeces associated gemycircularvirus 21	MTFAINAKYVLLTYAQCGDLDGFAVMDRISELGGECIVARETHADGGTHLHVFCDFGRKFRSRKTDVFDVLGYHPNIEPSRGTPEKGYDYAIKDGDVICGGLARPTTSRTGDSSANSKWTEITSATNRDEFWELVHLLDPKSAACSFGQLQKYCDWKFAVAPPTYTSPTGVEFDDGSIDGRLDWLQQSGVGSGQPLLGRCMSLCLYGESRTGKTLWARSLGAHIYCVGLVSGDECMKADDADYAIFDDIRGGIKFFPSFKEWLGCQAWVTVKCLYREPKLIKWGKPSIWISNTDPRDNMETSDVHWMNKNCIFVAVDSPIFRANTE	Genomoviridae	-	0.97
KT862243	Faeces associated gemycircularvirus 20	MSAFQVNSRYVLLTYAQCGDLDPWAVNDLLSTLGAECIIGRERHEDGGIHLHAFVDFNRKFRTRRSDIFDVDGHHPNISQSRGTPEKGYDYAIKDGDVVAGGLGRPEGKSGGGDGSTHAKWTAITQAENREQFWELCHELDPKAAATSFTQLSKYADWRFAPDPPVYEHPIGISFTDGDLDGRREWLDQAGIGGGERRGRCKSLCLFGRSRTGKTLWARSLGQHIYCVGLVSGDECMKAPDVDYAIFDDIRGGMKFFPSFKEWLGAQAWVTVKRLYREPALVQWGKPSIWLANSDPRNDMSQDDVQWMEDNCIFVECNETIFRANIE	Genomoviridae	-	0.97
KT732792	Pacific flying fox faeces associated gemycircularvirus-2	MSFYFCARYGLFTYSQCADLNHWAVLDLFSGLGAECIIGRELHEDGGTHLHVFADFGRRFRSRSSKIFDCEGRHPNVSASRGKPDEGWDYAIKDGDVVAGGLERPDGVTRRSGDSTSDQKWGEIAGAEDRDEFWRLVHELDPKSLVIHFPAISKYCDWKFSPRQVEYVHPINIDFVGGEVDGRDHWLAQAGIGLGGTGKSPQMNTWGPRFHPAGLRGMKSLCVYGKSRTGKTLWARSLGRHIYCIGLVSGAECARAEEVDYAVFDDIRGGIKFFHAYKEWMGAQAVVSVKLLYRDPKLVRWGKPSIWLSNKDPRCDMSQEDVEWLEDNCIFVECNETIFRANTE	Genomoviridae	-	0.97
KF413620	Hypericum japonicum associated circular DNA virus	MPQLEWNFRYVLVTYAQCGDLDPWRVVERFSSLGAECIVGREHHEDGGLHLHVFADFGRKFRSRKADILDVDGRHPNLAPIKRTPAKAYDYAIKDGDVVAGGLERPVEGGVGNGTSADKWSRITQAEDRDEFWALVHELDPKAAACSFNALSKYADWRFAEKPPVYEHDGRIEFVPGDADGRDDWVSQSGIGLDEPFLGGRVKSLVLFGGTRTGKTTWARSLGKHLYCIGLVSGAECSKGADAEYAVFDDIRGGFGFFHGYKEWLGAQPHVSIKQLYREPYYMKWGKPSIWICNTDPRLDAYGPNATPDWEWMEGNCHFIEVKDSLISSISHASTE	Genomoviridae	-	0.97
KT732814	Pacific flying fox faeces associated gemycircularvirus-13	MPSNGLFVNSRYKLLTYAQCGDLDPFDIVDLLSGLQGECIVGRELHSDGGIHLHVFVDFGRKFRSRSVGIFDVGGRHPNVVASWGTPEEGYDYAIKDGDVVAGGLERPTPRESRAGNGSAAAKWATIADADDREQFFELVKSLDPKTFVTRLQDLQRFADWKFRSDPEPYITPNNIHFPDDGTDGRAEWVHSSLCLYGESRLGKTLWARSLGHHVYFCGLFSGKELLNNLDADYAVFDDMQGGISFFHGWKNWFGCQLNFQVKQMYRDPVNVTWGKSCIWGSNDDPRDSMKQVDVDWINKNCIFVEVTQPIFHANTE	Genomoviridae	-	0.93
KT732806	Pacific flying fox faeces associated gemycircularvirus-14	MAPFILKNVRRALLTYSQCGTLDPFAVSDHFSNLGAECIVGRERHADGGLHLHVFVDFGRQFSSRKTDVFDVGGHHPNIAKCGRTPWKAYDYAIKDGDVVAGGLDRPIEESGDGSGTIDSTWHSILAAETPEEFWALCHDLAPRDLARSFPSLQKYCDWRYRPVTRPYCTPDGYEFDTSRAPELNEWLLQANLGLRGNWDQGRPKSLVLYGDTRLGKTVWARSHGPHIYFCGLYSGAEAMKHDGADYAVFDDIQGGIKFFHGFKNWLGAQAEFQVKILYKDPVIIQWGKPSIWLSNSDPRLDLSPSDATWLEGNCIFVELSVPLFTSRANTA	Genomoviridae	-	0.97
KT862250	Faeces associated gemycircularvirus 19	MSAFHFSARYVLLTYPQSGELSEWAVLDHISGLGAECIIGREDHADGGTHLHVFADFGRKKQSRRGDYFDVGGKHPNVVPSKGRPEGGWDYATKDGNVVAGGLGRPGTSGLPKAPNPWREIVGAEGREEFLDLVRQLDPKSFVLKHQEIVRYADIFFAEDREPYVGPDGIRFELGMVPQLDEWRRESLGDNPVEGKSRSLVLYGPSRLGKTIWARSLGPHVYIMGLLSGAVLLRDAPGASYAVFDDMRGGLPMFPSFKEWFGSQSLVTVKKMYRDPVQMRWGKPCIWLANSDPRDQLKADITDRTPKGRVDLIYEDIAWLEANCVFVELSEPIFRANMHNSPE	Genomoviridae	-	0.97
KT862248	Faeces associated gemycircularvirus 18	MPTFYFSARYVLLTYSQCGTLDEWDVLDHISSLGAECIIGREDHADGGTHLHVFVDFGHKKQSRRSGFFDVGGKHPNVVPSRGRAGEGWDYAVKDGNVVAGGLPRPGSGGLPSVENIWSSIVDAQSREEFLELVRALAPKEFILRHKELLEYADRYYAERIEPYVGPDGIEFELGMVPELAGWGRELVEADSVTGEAKSLVLYGPSRLGKTLWSRSLGSHVYIMGMLSGAVLLRDMPDAQYAVFDDLRGGIAMFPSFKEWLGAQAVVTVKKLYRDPVQVSWGKPCIWLANSDPRDQLKADITERTPRGRIDLIYEDIAWLEDNCVFVNVTEPIFRAST	Genomoviridae	-	0.93
KT253577	Poaceae-associated gemycircularvirus 1 isolat PaGmV-1_TO_STO14-29204_2014	MTHFIFSARYVLLTYAQSGDLSEWDILDHISSLGAECIIGREDHADGGTHLHVFVDFGRKKQSRRSDFFDVGGHHPNITPSRGRPECGYDYAIKDGDVVAGGLARPGGGGLPSLADKWRTIVSAESREEFFDLLRELDPKTLVTRWSELCRYADHAYESKPEPYVGPSGVEFELGMVPELVRWRGDTLADDSELVLCYFGASRLGKTLWARSLGPHVYTMGILSGHVLLRDMPEVNYAVFDDMRGGIGMFPSFKEWLGAQAVVSVKKLYRDPVQVPWGRPCIWLSNADPRDQIKSGLSDRSSRGQIELVENDIAWLEDNCIFVELLEPIFRASIG	Genomoviridae	-	0.97
KT732796	Pacific flying fox faeces associated gemycircularvirus-4	MTFLFSARYVLLTYPQCGTLDGWAVSDHLSALGAECIVGRENHSDGGTHLHAFVDFGRKKQSRRSDFFDVGGHHPNIAPSRGRPERGYDYAIKDGDVVAGGLARPGGGGLPEIANKWSEIVSAESREQFFDLLRQLDPKTLVTRWTELNKYADAAYAPTPEPYVGSDGKQFELGMVPELARWGEQLVANDPVEGNLVLYGPSRLGKTVWARSLGPHVYSMGIVSGKLLLRDAPEAKYAVFDDMRGGIGYFHSWKEWLGAQSVVTVKELYRDPVQLVWGRPCIWLANRDPRLELGAYFTARSTPNKGALFQSDWAWLETNCYFWGARTTLFFRPNTD	Genomoviridae	-	0.97
KF371639	Faeces associated gemycircularvirus 3	MPPKAKPNPYFADGRYFLLTYAQCGTLDAWTVNDHLAFLGAECIIGRELHADGGTHLHAFCDFSRRFRSRRSDVFDVGGRHPNLVPSYGKPEGGYDYAIKDGDVVAGGLSRPSGRGVYEDVSSWSIIVGQESEGEFWKCVARLDPRALCTNYNSLRAYANWRYRPAPVPYEHPAGIEFELGMVPELAVWREIALGADRERGILVIFGDTRLGKTLWARSIGPHIYTIGQMSGEVILRDGPDADYAVFDDMRGGLEFFHGWKEWFGCQSVVTVKKLYRDPVQMPWGKPVIWLSNRDPRDELRDSITNHTSMGKQASIEGDIKWLDGNCIFVELDHAIFRANTE	Genomoviridae	-	0.94
KT862241	Faeces associated gemycircularvirus 4	MPPKQFQFQARYVLLTYAQCGDLDAWAVNDHLAFLGGECIIGREHHADGGTHLHAFCDFSRKFRSRRPDVFDVGGFHPNIEASRGRPEGGYDYAIKDGDVVAGGLSRPGGRGVYEDVSSWSIIVSQESEGDFWECVARLDPRSLCTNYNSLRAYANWKYRPTPVQYVHPAGVEFELGMVPELAVWREIALGANRQRGRAKSLVIYGDTRLGKTLWARSLGPHIYTIGQMSGEVILRDGPDADYVVFDDMRGGLDFFHGWKEWFGCQTVVTVKKLYKDPMQMPWGKPVIWLANRDPREELRDSITCHTSLGKQAAIEGDIKWLDGNCIFVELDHAIFRANTE	Genomoviridae	-	0.91
KT598248	Soybean leaf-associated gemycircularvirus 1	MPDFHCNAKYFLITYSQSAGLDEWAVNDHFSSLGAECIIAREDHADRGTHLHAFVAFERKFRSRRPDIFDVGGFHPNIAPSRGNPAGGYDYATKHGDVVAGGLERPGGGGVSKTSTPWHWIIAASSGGELRDLVRELAPKEAILRWREIEGYIGNEFAEERPAYVHPIGFEFELGMVPELNLGLADICLGVRYKSLVIFGPSQTGKSTWARSLGNHFFARGKFNGREFVKVEQSVDYYVLDDMEGGLRFFPGWKHFLGMQTWFNVRQFHRDPPMVKGGKPCIWLCNLDPRDEMYANLRHNESRVQVDNDVAWLEANCIFVEVHEPIFRANIA	Genomoviridae	-	0.93
KT598248	Soybean leaf-associated gemycircularvirus 1	MPDFHCNAKYFLITYSQSAGLDEWAVNDHFSSLGAECIIAREDHADRGTHLHAFVAFERKFRSRRPDIFDVGGFHPNIAPSRGNPAGGYDYATKHGDVVAGGLERPGGGGVSKTSTPWHWIIAASSGGELRDLVRELAPKEAILRWREIEGYIGNEFAEERPAYVHPIGFEFELGMVPELVEWRRNTLDADRVEGVRYKSLVIFGPSQTGKSTWARSLGNHFFARGKFNGREFVKVEQSVDYYVLDDMEGGLRFFPGWKHFLGMQTWFNVRQFHRDPPMVKGGKPCIWLCNLDPRDEMYANLRHNESRVQVDNDVAWLEANCIFVEVHEPIFRANIA	Genomoviridae	-	0.93
KF371636	Faeces associated gemycircularvirus 6	MLFVNSRYVLLTYAQCGDLDPWSVSNHLSALGAECIVAREIHPTTGGIHLHCFADFNRKFRSRSARIFDVDGRHPNVVPSRGTPEKGYDYAIKDGDVRAGGLGRPAPRGGMSVGAHALVNVAHLCEDTTEFLELHDEMDRSGLIARFNNVRAYADWRFRPEPVVYASPDGVDFRSGSTDGRDDWLVQSRIGDELPFVSAPVANAPFAGYIFCLLILYGPSLTGKTTWARSLGDHIFIQGVLSGKEVLNSDESARYAVLDDIRGGLKFFPAWKDWLGGQRWISVKQMYRDPILLKWGRPCIWCANRDPRADIRRSIDKDDGCFMEDDMDWINANCIFVYVDESLVTFRASTE	Genomoviridae	-	0.97
KT862249	Faeces associated gemycircularvirus 16	MTQMLFCNSKYVLLTYAQCGDLDEWAVSDHLSSLGAECIVARELHPTTGGVHLHVFVDFGRKFRSRRVDIFDVEGRHPNVVPSKGTPEKGYDYAIKDGEVVAGGLERPRGGRPGTVSGLEAIAHLCETQDEFLDIYGEVDTRGLIKNFANVRSYAKWRYAGTLPKYESPYSIGEFRRGSDGRDQWLAQSGIRSGDLVVRPKSLVLYGPSRTGKTSWARSLGTHVYFGGAFSGGDALACADDVKYAVFDDMRGGIPFFHGWKDWLGAQQEFMVKALYHDPKLFKWGRPSIWCANRDPREEMENHMFKGTFCRGDIDWLNANCIFVEVNSPIFRASIE	Genomoviridae	-	0.94
KT732804	Pacific flying fox faeces associated gemycircularvirus-10	MPLAVNAQHFLLTYAHVEGNDDKPELDPFRIVDVLGAKGAECIVAREFYPNTGGFHFHVFCSFERNFRSRKADVFDVDGYHPNIEPSRKNAAGGFDYATKDGDIVAGGLERPSRTRGRAGTTGAQATWGEITAAESAEEFWRLCEELDPKSMVCNFPALSKFAEWRFRPIPVPYASPDGVFDTSGYPIIEEWRSSVFDEYSGRGESYTYLTSLVLFGPTRLGKTTWARSLGSHIYFGGLFSAGEAMRCPEAEYAIMDDIAGGIKFFPRFKDWLGCQAQFQLKVLYKEPALYDWGKPCIWCYNVDPRAGMSVEDIEWLEGNCVFVEITSPIFHANTE	Genomoviridae	-	0.97
KF371635	Faeces associated gemycircularvirus 7	MSRQFCLKDAKYCLLTYPQIPETEAYEFPELASELFSSERVDANYVIGRELHADGGYTSHCFLDFGRKFSSRDTRIFDIQGHHPNIERVGRTPRTAYNYTIKDNDVVARSGEYSGPPENNNSRERQSGNDTSSDWATILCAESRDEFFDLCKSLQPRSLACSFLSLTRYADWRYRPVPTPYQHPDDWSFNLESHSVLLDWVDESLRGGQDRSLVMYGETRLGKTVWARSLGPHLYFCGLYSYKEASRAHEAEYAIFDDLQGGIKFFHGFKNWLGAQQEFQIKGLYRDPELLKWGKPSIWCSNTDPRQDLDYSDRCWLEGNCVFVEVTTSLIG	Genomoviridae	-	0.93
KR912221	Gemycircularvirus gemy-ch-rat1	MPSNRFHIKGCRYALITYAQCGRPRIPWAIVGLFSTHRAECTVGRESHADGGIHFHALVDFGRQFGSRKADVFDVGGRHPNIQKSGGTPEKGYDYGIKDGDVVAGGLERPLSGQSGSGARSSRVVWATITMAENAGEFWRLCHELAPEHVCRFPSYARATSCADRSLARSLAARHGVTRNVCNADKCRRKSLVVVGESELDKTVWARSLGNHLFFSGLYSGAEAMRYADAEYAVFDGMQGGIGSFHGYKNWLGAQMNFQVKVLYPDPKMITWGKPCIWLSNWKEEPRNVESVDQDWLKENCIFVDLWENIAGPISHASTETL	Genomoviridae	-	0.97
KM598387	Odonata associated gemycircularvirus-2	MAPFHLKNRRYVLLTYSQAGSEFNYWAIVDMLSSHGAECIIGRELDADGGTHFHVFVDFGRLFSTRKTNVFDVDGHHPNILPVWKTPGEAFDYAAKDGDIVAGGLERPGTDCDYDIENFWACAGASQSGEEFLHFLDQLAPRDLMRGFIQFRSYADWKWAVAPERYVNPPGVMFDTGHAEQLSEWLSQANLGSGPGRVRLVAHLHGSRKSLMLWGPTQYGKTTWARSLGNHIFFGSQFSGKLALDGMQDAEYAVFDDWKGGMKALPGYKDWFGCQWQISVRKLHHDAKLITWGRPIIWLCNKDPRLMHVATDDVDWEWMDDNVIFVELARPLATFRASTE	Genomoviridae	-	0.97
KT732801	Pacific flying fox faeces associated gemycircularvirus-8	MPSSFHLKNRRYVLFTYSQAGPDFDYWAVVDLLGDMGAECIIGREVHADGGIHFHVFTDFGRLFSTRKVRVFDVGGKHPNIKPIGRTPAQAYDYAIKDGDVVAGGLGRPGGDCDWDPDNFWAAATHTGSSEEFLHFCDQLAPRDFIRGFTNFRAYSNWKFNPGIPEYDQPDGATYDTSAAPGIDEWLSQRKSLVLFGPYGCGKTLWARSLARHIYFGSSWSGELAFAGIDTAEYAIFDDWAGGLKCLPKYKDWFGAQWHISVRRLHHDAKLVEWGRPIIWLCNRDPRILSHERDDIDWEWMETACHFVEVTGKLVTFHANTE	Genomoviridae	-	0.94
KF371637	Faeces associated gemycircularvirus 5	MTFILNARYFLVTYPQSDGLDEWAVNDHFGSLGAECIVARENHAVRGTHLHVFCDFGRKFRSRRADIFDVGGFHPNIERSKRNPRKGALYACKDGDIVAGGLDVPGLATSIVSAAQDPGATLVCAESQREFFELAEDICPWDLITKFGSMHAYAKWKFPELAEPYENPAGFTLADGAFPDLVSWRTGALEHSGRIKSLVLIGDALTGKTTWARMLGNHLYMKERYNAKQASLADGVDYGVIDDISGGIKYFPHWKSWFGGQPHIQVKILYKDERLVKWGKPLIWIANRDPRDQLRDMVSRDYSEEQCNNDVYWMEGNAIFVDIRQSSIISHANTE	Genomoviridae	-	0.97
KP153522	Lake Sarah-associated circular virus-51	MQNTHASSDEEVEAGPSRTFRIDARHLELTYSRCNATVEDITEFLETTVASSAQCHSWFAAREYHQDGVPHYHILVKFNKRRTFRNSREYDFNGHHPRIKPVRNVHDYFRYISDPSKPSRDTTFASTGWMDPIPRDGARGGGRGRRDDDLGGDGCTWGDIVRADGKDEYFTLLKLHKPRDYCLNLQRLEYTASRLFTAITPYVPEYEYDTFNVPEELHEWATVGRHLQPRPKSLIICGPSRIGKTEWARSIGLHTYWYGQCNIDSWNDKMEYLIMDDFSPEITKYLPLWKGYFGAQKELNVTQKYRGIYTKLFRVPVLWLCNQIPILKDWEQEWLNMNADTYFINDKLYG	unclassified	-	0.26
KP153446	Lake Sarah-associated circular virus-26	MVFNFNAKHVFLTYPQTTLTKEALYEASIRWGCVSGTIGQEKHQDGGLHLHAVFAFDRKRHIRDERFFDLEGYHPNVQSARNVKAVREYCEKEDPEALRYGAFEGCEKIDWKDLLGLATDSAHFIKLVTDRDVSFCVKHFSNVRAFAEYTFRSRKEDFTPQFTDFRNQLRPMQDFHAELLRPSRPRERHTSIVIVGATRLGKTEWARSLGNHTYWSGAVDWTRHDNHSRYAVIDDLSLEYIPRLQQIFGCQHNISVSQKYKPIMTFDWGIPVIYLTNDENYLEKQPDFIKSWWQNNVVTCHVRNKLFV	unclassified	und(genomolike)|und(geminilike)	0.31
KJ938716	Ancient caribou feces associated virus	MPPREPRFNGIRFFLTYARADAISIDDVADHLHQLADSWLEIVQEDHVPNEEHPDGGIHYHVVLCFATRYQGALDSFDVLGHHPNWTPIRNATVDLTNRRHYIRKGIRAKEDQHTVKNHKTTACDYIIEPDTRGNVPEYSSQAGRLNWGGILEQATTGEEFLALCRLHQPKDWILRNEALTKYAASYYQEAREPKKSLPPGTLSSFLPRWMNGSNKSLPRYVYSGSFTRTSLDVLIIDSLIMLQPKPDRPKTLLLVGPTRLGKTHWAESLGRHSYMCGMWRSDSFNDRDDYLILDDFDFDFFHGMRKAIWGAQPEFTTVDKWRKGVAKWGKPLIWLCQEEKNPFVALDKNGRPVMAEEERAWYRANCVEVHVTTKLYPE	unclassified	-	0.59
KM821748	Sewage-associated circular DNA virus-36 isolat SaCV-36_NZ-BS3974-2012	MARTPRTNAQRYFLTYSQAHALDIDDLANFLHALAPSWLEIVQENHQDDGIHYHVVLCFDERFQRALDVFDLDNHHPNIAIIKNASGDLNNRRHYIRKGADRPKESEHTIADHKKGPCDYIIEPDTRGEVPPYSTSAGRLNWGGILESAKSEEEFLILVRVNQPTEWVLRNDSIVKYAKTHYKAAREPEKVYPPESWVVPPALDDWVAEVFSDVSTRGVLPRPDRPKTLLLVGPTRLGKSVWAKSLGRYSYMCGMWHSDEFDESAQYLILDDFEFDFFHGMRKAIWGAQEVFTTTDKWRKGVARWGKPTIWICQEEHNPFTAVNRKTGLAVMDETERDWYKQNCVEVHVNTKFIRLRTCSGRSNRRDII	unclassified	-	0.52
KJ547620	Sewage-associated circular DNA virus-1 isolat SaCV-1_NZ-BS3349-2012	MPPAWEGSSFIITYPQSDFDLQEYIDTWENKKHIKYLLISTELHQDESLHRHAVLHFSKKQRVGHAFFDHLTRHPNIKCVGKRRSDWTNVIAYVKKCGEFVEWGEPRHSACVWSAIATSSTRQEAQEMLSIERPRDAVLNARNFDYWLDKVFPMSETASYSGRSSDQFVVPPALQDWVLMSWWYVLPRQERPKSLVLNGASRLGKTQWARSLGPHIYIGNMWDLGALDGIDSNFWNYGYIVFDDIEWASIAGSAKSWFGAQRDFSVSDKYKRRTGWWYVTSTNENGDWLVVFLAFFLSTLTLIAVIVIVLLTQNGDVKTLI	unclassified	und|und(genomolike)	0.23
KT732829	Pacific flying fox faeces associated circular DNA virus-2 isolat Tbat_A_103763	MASPPSRQRQARNIIKGLAVCRVPPAPETSFQMVGPIRQRNFRINATRFLLTYPQSTFDVQLVWDFFNSLAIKPKRAILCREHHQDGSEHVHVAIEFERAVNTTRVSIFDFGGRHPNIQSARNWAACVNYCRKEGVIETAYFGCTAEDATVASAPGERAPAESPYARAESARTIREWFEYCIAEGIGYAYANAIWNQIHSVRPPTYFENDFSGIVSGPTLSHLRWDPEWHTIFLCGPSGLGKSSWALANAPVPFLFVTDIDDLGFFDPEVHKALVFDEIRCTGEPNDNSAKGKWPLTSQIKLATWDTPVSIRIRYKIAHLPAHVPKIFTSCDWFPMNGDEQIRRRIKAFNLYEDGRSTESLWL	CRESS6	-	0.25
KM598398	Odonata-associated circular virus-15 isolat OdasCV-15-US-1640LM1-12	MSSNASSLSTSTNSFRIQAKSFFLTYPQCSASKQDLKNFLDTKGRIVYYLIGQERHEDGNFHLHALVTYEKKINVKRTTFFDLNGFHPNIQAAKNLPALKNYISKEDIEPLTSTVEPEEEDNLYDLARVTPEENYFEICRKRKVHPSIISRVPFMYANQAFLKILKDASVNTIGEEYQVIGTITSTVLQNLQLPTDMTSLWVKGPSGIGKTTWALTVSNKPALFVRHLDTLREFRNGYHKTIIFDDMSFQHLPRTAQIELVDRYHPQQIHIRYAVVNIPPNIPKIFLSNDSIFTYDEAIFRRLTLVNLEFTDQ	CRESS6	CRESS6|CRESS6	0.17
KM874358	Avon-Heathcote Estuary associated circular virus 25 isolat AHEaCV-25-NZ-3789GA-2012	MARENRFRLQCRRLFLTYPHCTASIQEVYDLIHSKKEIKFARICIEPHSDGTPHIHAAVMFAKKVNICNARLFDINDHHCNMESIKNWPATLNYCKKGDNWEDFDNDDDPDQPMQDNLFELAETMPSNDFWEYCRLKKVPFAYASNAMRKKKSMFTITDSTPYGIIREDLGAYTITEDSPATLASTVLVGPSGIGKTSWAIRESEKPSLLVTHMDALRKLNGSHKSIIFDDMSFTHIPREAQIHLVDRFQPRQVHVRYGTADIPAGIQKIFTANQYPFVADPAIDRRVHNKNLY	CRESS6	-	0.44
KT149395	Circovirus-like genome DCCV-2	MFRINAKNFSLTYSNVEQQSGVAWLPWDKESLLRHLESLGDGVIGMVSREQHQDGSTHFHAWVQFPRKRDIRASNFFDWQGCHPNVQATNNLRAWKTYICKDGDHTPEPATPTATGDLFVLCHSMEKHEWVNYCIGKKIGFQYMEYIWKDCHMDRDSTIEDNPPPEAVMCAALEQFIYPSLDRSPLVLVGDTGCGKTTWAIKNAPKPICFVSHMDQLKHFDPQYHKSIVFDDMDFKHLPRESQIHILDMTTPRAIHRRYGVTVIPAGTKKIFTANSNPFIEDPAIIRRRTLRIVQGL	CRESS6	-	0.31
KM598390	Odonata-associated circular virus-7	MPFRFAARNVFLTYSHQEGGWGVPNMQELFQRLQEIKPTNYVVLSKEQHGDGTDHFHAVLCFKRKLDTVNPRLFDFNGWHPKIESPRSVAASITYVKKDGDFLEVGTEPTNRTFTDLHAKCQEMERAEWEEYCIGEHISFAYCESIYNRTHPRQRGTIYEGEEFNDGELSLALERFSWGFPESQSLILVGPSGCGKTLWAKRNAPRPCLFISHIDRLTEFDERVHKSIIFDDMTFNHYPLQAQIHIVDQYDDRDIHVRYKTAFIPKKTPKVFTCNEEPFCRHETIKRRSKTYNIIN	CRESS6	-	0.28
KP153501	Lake Sarah-associated circular virus-45	MPSFYNGKQFFLTYPQCQHSAAELAAFLTSVATCTYYIVAEEKHEDGTPHLHACIQYVETLRGGVRLLDFNGHHPNKQDPRKFEACKQYCRKDGNFIEGPPEAIIRAAIAGLAPSDIVKTFTDKALWFDWCISKRITHGYAEWYWNSTREHDLTINEDTVVAGQMCESLAGYAFNRDQHRVIVLKGESGCGKTTWAKTHAPKPALFVSHIDSLKRFQPGFHKTIIFDDVDFNHYPRTGQIHIVDWENPRAIHVRYGTVEIPAGTFKIFTCNFDPLTLTDDAIRRRVKVVNVN	CRESS6	-	0.22
KM510189	Bromus-associated circular DNA virus 1 isolat BasCV-1_NZ-NZG01_Sef-2012	MAQFVLSEAAVDDTDISDTEAELLLPPATVFDAVLKGFRLSAKRYLLTYAQCPEDPDDIFRQLDRKRAIARAVGCIELHADGNPHIHIAVEFAKKLNSVDTKYFDYAYDDTCESYHPNISPAQSWPKCINYCRGKNKTLTDASGIRGPKPDLFVQARACNGNKELWLQWLFEHNVQPTLGLEVWRSLHAPPAFQTFETLMDIREPIAATFDQRLLYLQLPDDFTKSVVIIGPSGSGKTVWAFNRMFERFGPGLSVGDIDDLKLFRPEQHSCIVFDEVRFGGDFQTGKGRFKLETQIALCDTARSRTIRCRHGNGFIAANTPRVFTCTGTLPFTQDYQIERRIHIINLYNDREISDLWPPTF	CRESS6	-	0.5
KP005454	Bromus-associated circular DNA virus 4	MSQFILDEASASDDDFADQHDLPTVTQATAKSVRWSAKKFLLTYSQCCEDPEDIFSRIDALRKVKRAVGCIELHQDGNPHIHIALEFETKLNTTNCRYFDYAYNADCKNFHPNVTVADSWPKCINYCRGKNKTLIELYHAAEGGKRKYDLFAVAAGFADNQRAWTQWCYEHDISPLWKSDVWRQLRTPVGVSSRDEPMELDAVRPTTIDTRFAFMVLPEHFKQSVVLLGPSNCGKTTWAVNHMVERFGKILIVNEIDDLRRLDATHKGIVFDEIRFTGDLSTGKGKWPLHSQIALVDNALGRSIHCRNINAWIPKGTPKLFTCTEKFPFTYNYQVYRRLNIINLYPEPEDELWVREL	CRESS6	-	0.5
KT732830	Pacific flying fox faeces associated circular DNA virus-12 isolat Tbat_H_65519	MQYMDDAAADVERPDIIAAQFRLSAKNLFLTYPHCGVQLEIARDIILEALGRGNVEYMVVAHERHQDGDLHIHAVVCLIVRCDIRNANLLDLGEYHGNYQAIRNVRASVRYVKKDNVFIEYGTINAKYADAEDRAAVLAKLVQCTSEADAMHFIYVNGHARESYLLLQYWKTKQGESKPGARFARDAFLPCASLLAALEELEESDRCLLLIGPSGWGKTQYLLAHYNERQIVRATHMDDLKKISKTTEILILDDLSYGHLPRQTLLHLFDMKTDRSVHVRYTVANLHQSLLVILVGNELELVLGAHIEDVAVMRRVTVFQLPHRLWD	unclassified	CRESS-Rec2|CRESS6	0
KM510191	Bromus-associated circular DNA virus 2 isolat BasCV-2_NZ-NZG03_Wel-2012	MPSAVRWVNVCFTSFSEEPPTKGDKISYLIYQRERGNDTHREHWQGYAESINPKGWCIRTWQCELSSHNAHIECRKGTQSQAIEYCRKEETRLSGPFEFGEAKASKKRKGDDTDNVYREAGETASSAADYLRIVAAGDPKGFAKSFNSIKACAEHLFPEEVFPPYVAPPWCNKGWKLTADLVKWVEQELPRKDRPKCLVLVGPSRLGKTQWARSLGRHMYWRGMTNVTHWDSAAKYLIFDDIEWKFIPQKKSLLTCMGSATVTDKYKGKRDIIVDKPAIVLCNEFDIDSIEESAYWARNLQVVHVSEPLFDTTQLAIAQ	unclassified	und|und	0
KP153396	Lake Sarah-associated circular virus-3	MPFRLNTSCFHLTYKFHLPIAIIVEHVVRRINRGQPIYWSIVHESADEEAPYEHTHALFKFATRCDITSERAFDIVHDGIVVHPHIKSVKTGDHEANTWTYHEKAPVNIERFGPGPKIPDRTLQAQADSFKRPRTLLEACTANGIEIKSVTDVQAIRRDRPTPALYVHQFPGATWTYKHPTEFTCLFISGSSGMGKTQWALHLFRSPFLCSHIDDLKHYDETTHDGIVFDDMSFFHLPRESVIHLCDFDLDRSIHCRHHCALIPAGTRKVFTSNKRFEEVFPPDEHGAIKRRFQFATGRPAIIYFPFGVPLYTLPTEVTDVPVGLLPDVDILTPLGLEDTFGTSVTNVSVKDQTTTPDDQLDTRIIASYVGGFHPTRLEAFSNFSPLIEDWSDIDFLLN	unclassified	CRESS-Rec2|CRESS6	0
KJ547647	McMurdo Ice Shelf pond-associated circular DNA virus-2 isolat alg49-66	MVNARCVCVTIHVDNIFWELQKWNQSLTYGIGQLELGLNGSTHWQMYFENNTAISLTQWKQLLGCKRAHVETRKGTALLAIEYCKKEETRLHGPGTSFEFGKTTEESVKRKSPDSPYKKALNCLSYADSIAIIKDEAPRDYVIYHNQVTSTLKAIFKPVWNKTPGLVFNLEPFPEETLNTRAVIFMGRSGLGKTQFAISHFKDPLIVSHIDDLKKLNPTIDGIIFDDMNFQHWPPTACIHLCDMELPRSINVKYGTVEIPANTPRIFTSNRDFEEIWSKDCTFEEMNAIRRRCDITTFDNELY	unclassified	und|CRESS6	0
KP153403	Lake Sarah-associated circular virus-6	MEPIDEASQPMEDDLGVMSPKKKFRATAKNFALTFPQCDMNKEDAFQKIMDEHKPAYLCVAEEEHKDGSPHLHALISFSSKKNIKDPKHFDLSDNESTFHCNIQSCKSVADWKRYIKKDGKYKETEESFVLDDHRLGQRQKLYNDFCWSKTYIERNERRDIDWPVTIRDSEGHEHTMERPLPDEQGLLTKKRNWWIVSPPNAGKTYWVNKQFKGQKIFMRENKEYAWEDYDHEDIIIVDDSTMKWEELSAVCNTYTNLKQVPGKIRYKNLYWKQNHARNIIILSNLKPIDCYGQNTTILNAVLERFVVLEIDNLINN	unclassified	und(geminilike)|CRESS-Rec2(circolike)	0
KX388496	Cruciviridae sp. isolate CRUV-17-B	LSLLFFVENLETPKTPKNPSKTEKKAKNKKEKSNFRANAKSMSITYSHCKVKKDKLMEFMKTFNPIEIYIAQELHKDGYPHIHIMITFSHKNYKDCRIYDYTDPEDNVLYHPNWSGTKDYTKWKNYLIKEDKEFLLWQKDLTPNDFELGHKERMMKDVHFAKKWEKTNSLKEINYPINFCGHIIDKPNPATKDRNMWIVGKPNERKTFNMNKTFKGLKVFIRSNDVYPFEDYNDEDIVIYDDYLPKFTEIADVCNTWEVRKRIYGGCRYHTKYWGENSRTVIVLTNTRLKDYCGNDESERKLLPAMKARFKEYRLINDKITPFVETPNLADELVTYKVNNSEQISTYLNIVNDKINIPTPIIGKSNKGYVPLQFQLMKYVIET	unclassified	und(geminilike)|CRESS-Rec2(circolike)	0.5
KM598391	Odonata-associated circular virus-8	MIEDVEKFFDKQDKKKEGYRATGKAFFLTYPKCDIKRDEAYTMLAKQWNPSNLIVAQEDHKDGTPHLHVYMQLPTKKNFKNPRWADLGKYHGFYTTVRDRQAVMAYVMKDGNFKMNENLNFTTWHNFRKEKGDFDAWIIHNESKKLKSPYPFKLPDGTDVLEPKLGEKKCNHMIIGIPDTGKSFWYNTTFEGKRVFSRVDGKYPFDDYEGQEVVIYNDPQTVTLMELINVSDCYLVKTPVFGDTRYTKKYWKMKQRRTIIFICNHGRIPNFVEDPAFRSRFNIWDMGDDEPEPEEMTDDPNRTEMDTDFDATDYAR	CRESS-Rec2	CRESS-Rec2|CRESS-Rec2(circolike)	0.13
KM821765	Sewage-associated circular DNA virus-30 isolat SaCV-30_NZ-BS4120-2012	MSNFRFHSKSIFLTFPQCDYPLKNFKDNIEAYFGDNLEKGVVSQENHQDGNKHLHAAICLHQQVTSRDPKLFDKLVDPAKHPNIAGRFTGGMLKAFDYVMKEGNFLPLNEKSFDLKEFLKLSKEKKNSRASLIVKEFDELPPEDVMENNKDFMLLHGKQMQAYVDWREERERRSKFARAQAQKVFVVPAPGYFNAWNNEIASWLTTNLRQKRKHRQTQLWIQGPPGIGKTSMMMMLEELYSLTIYHWPKDERWWDLYGDGQYDVILLDEFRSQKMITELNPILSGDPISLSRRGMAPIVKRDNLPVIIMSNYLPEECFPTANEHGKLEPLLDRIKVVKCEGPIRIVEGAPPAECSTPFLFDDQPPPPPGSQFVLTNDYSEIFPQTPPEYETIDDDDLQP…	CRESS-Rec2	CRESS-Rec2|CRESS-Rec2(circolike)	0.16
KT862231	Duck faeces associated circular DNA virus 1	MPSFQINSKSLFLTFPQCQTSLLRFQELINGFFGKNLEKGVICQENHKDSQDLHLHAAICLKETLRSRDPRVFDCLVEPAQHGDIETRFKGGVLKAFQYVMKDGNYLPLGQGFDLNLFMEQATKKKCTKTSLILKDIQAGATLDSLVPEHAEYLLQNLQKVKAYLDFLSLREKRLAFAEGQTQKVHVMPAEGYCLSWNQEIASWLNLNLRQKRSHRQKQMWICAPPGMGKTSMIMMLEKAYDLQVYYWPKEEVWWDAYSDGAYDLIVLDEFHSQKTITQLNPILSGDPTPLSRRCSAPLTKRDNLPVIIMSNYLPEECFSKVAANAPSKLAPLIDRLTIVNVQGPIRMAPVLEDDPQEVLAALTDETSYVQLTPSPGTPNLRQFGDDEEDWFAEEEFRR…	CRESS-Rec2	CRESS-Rec2|CRESS-Rec2(circolike)	0.17
KT732833	Pacific flying fox faeces associated circular DNA virus-14 isolat Tbat_5606	MNSVCTLSHRSTSLLSATTTVTDPHTTTTETTRPDIVIRPDTLISANRNQDDETGLEPIPDKNFRLNCKAVFLTYPQCALEPEHVLQTILACNKTKHCSVIVAQEHHKDGNKHLHVYLEFPKKIDIKTARYFNYITGKQGNYQKVKVRGACIKYVCKENRYVAHQIDVPTIIQNYEKQQEKKKSRNQAKNKRVYELIKEGKKYEELLLDCTTGPYCLLHGNKIKNMITDFEEIAMKKQRIADRPAYLHLILPGKDIDLLAKKPFKSPQFWIFGPPNVGKTSMLQSLFDAGLKGFEIPINNDFARWDDELFDFAYIDEFKGQLTIQFLNSFLQGSRMALPGKYVIGGKIKNKNIPTFILSNYTPESCYKNKSVYDLQPLLARLDIIEIQKFGDIQVICTP…	CRESS-Rec2	CRESS-Rec2|CRESS-Rec2(circolike)	0.38
KT732834	Pacific flying fox faeces associated circular DNA virus-15 isolat Tbat_3598	MDTFLTAHQEEEPRYPGSDVEDDSLLCLEGPLSPEDETLEAPKEKPKSEKKKGSFRLRGTQFILTFPQCDVKKEVAAERIDIAWGKDLTGYVVCEENHKDGTPHLHVYLKFENRKSFSKVDCFDFIGQKHGNYQVVRSTLKSIEYVTKGGNYVAKGVDVESIKKKKAPKNQEIAKMLLDGKSMAEINEDHCGYVMINKRKIEEYETWVKCEKIKKSKIDWIPPSLDGLTDANLQIATWICSNIRQNRAFKAPQLYIHGPRNLGKTSLVEWLERSLSVYHMPTMEDFYDLYSDDYDLVVIDEFKGQKTIQFLNQFLQGSVMPIRKKGSQGDKSKNLPVVILSNYTLSECYVKAANDGRLNTLECRLEIVEVDSFIDFYKDRNDLI	CRESS-Rec2	CRESS-Rec2|CRESS-Rec2(circolike)	0.46
KM821753	Sewage-associated circular DNA virus-18 isolat SaCV-18_NZ-BS3994-2012	MDTFPTPNQLILEEDLAEPETLEAPTEKATAKGFRLSGKNFTITFPQCDVKKEIAVERIEQKFGSEIKGYLVCEEQHKDGTPHLHVYLSFLNKKNFKCHHCFNFIGGKQGNYQVTKSVRDWVTYCTKGDNYVAKGLDVQAIKKKTAPKSTTVATMLMEGKSLSEINAVDPGYVMINKRKLEEYESWVTIERNKKSKLTWVPPLLDGLTDANKQICEWICSNIRQPRKFKAPQLFITGPKNLGKTSLIEWLGQYLSLYHIPQTEEFYDLYTDDYDLVVFDEFKGQKTIQWMNLFLQGSPMNIRKKGSQYMKMKNLPVIILSNYTLGDCYPKARDDGRLETLQARLDVIEVDSFIDFYKDRSDIL	CRESS-Rec2	CRESS-Rec2|CRESS-Rec2(circolike)	0.24
KP153405	Lake Sarah-associated circular virus-8	MATNNKFSLQAKRFFLTFPQCPMDKHQVLLWLTGAHEAHQAIVAEEQHEDGSPHLHIYLTYEKAKRISHADYFDLGNPENPEQVFHPNIQTVKNMKECVKYITKTDKEPAQHNINYRDIIAGKSSKFAVIAASVMDGKSLLEINDSDPGFVLQHKRKLEEYQAWIVMKKPRNDLAAWYPVPVPAFGPEYQLATWLNANLFAQPRRIKASQLYLFSPPNCGKTTLITWLSRFCRIYYMPLLEDFYDFYDDDSYDLVVIDEFKGQKQIQFLNQWLDGQPCTVRIKGGQRLKTRNLPCIILSNWALSTVYSAAIEKSGPDVIGPLIARLEIVNVNKFITFYDPVWVEAQNKEN	CRESS-Rec2	CRESS-Rec2|CRESS-Rec2(circolike)	0.06
KM821763	Sewage-associated circular DNA virus-28 isolat SaCV-28_NZ-BS4064a-2012	MEAPPPAYSPPPPSVTPPIESSRPFRLAGKAIFLTWPQNDITKEDLMAKLVSLWEAKLSWAVVAEESHKSGEPHVHAIAQFTERIDLKNANPVLDALTGKHGNYQSVKSAKKVLRYVCKDGQYITHGEVPDFAEKAKLQDWAAKLIMEEQATYRDLVRQQPGYCMLQKPKLEEFIGWSKRQRLADSLLPWRVLTVKPNAPYVHQALWTFLRENVLVPRTPRQAQLWLSGLPGVGKTRFLSYLRARLRVYDMPRDEDFYDDFEDGCFDLVVLDEFKAHKKIQFLNAWADGQPLPLRKKGSQSVKTDNLPLIIVSNYTIEECYKSGVGRDALVDRFTQVFVDSLFSIDDPLYTE	CRESS-Rec2	CRESS-Rec2|CRESS-Rec2(circolike)	0.15
KM598399	Odonata-associated circular virus-2	MPFVINARKFLLTYPQCQASKEEVLARLQSLGEIKWYTVAIELHEDGSPHLHSACHYSKKIHTTNCRFFDFGATHCNIQTLKTQQDFERAESYCRKHGNFISNYDTKVPKRVLLAKKLIDHGQIDYDFIQENPEIIFFNYSSLNSYLSLVPKKKVKLNYPTMKQRHIWLHGPSNSGKTTWLRDYLTDRNHSEIPTNNDWCCNEATNVLWIDEYKGCLTIQQLNKLCDGDTQLNRKGGSTRILFPTIVILSNFNISAVYNNASDDMKATLYNRFIEYDSSVSFPPVA	CRESS-Rec2	CRESS-Rec2|CRESS-Rec2(circolike)	0
KR704912	Chimpanzee faeces associated circular DNA virus 1 isolat CPNG_29286	MPSWLPYNTTGSQEGKNRMTKGQIQYSQVLLTYPQCDRSKEELLKFIQGLDDICCAIVAKENHHETDGEHLHAWIRFNKSQRIATSKWGSLFDWDGKHGDYQKVTCTQRSIADTVTYVMKDGDTLIWNCNAEALKCKEKTHIRKYDNEKILNTPMKELIDEGVINVKEAAAYLRGKQLYKLLDKPAEKSKCRGIWVSGRPGTGKSTWAQKFGKSLGGFYEKAQNKWWDGYDGEKVVVMDDVDTDALIHYMKIWADKFPCKGEIKGCTVWLHHDWFIVTSNFTIEEICEMKQDGYKYVDAVKRRFKELHVPDTVQYLQWDPDFVWENPDAPDEEPHQEPTAPEPKRQPVDELSNTLLGSGY	unclassified	CRESS-Rec2|und(circolike)	0.09
JF755406	Rodent stool-associated circular genome virus	MASRVPRKQIRYAQVLLTYPQCDRTKESLLEFIQGIEDAGSAIVCKENHHETDGVHLHAWVRFNVSQRCEGSKWGSLFDWDGIHGHYDKVTCSTRSIADTVKYVMKDGDTLVWNCKPEALMNPGKSHERKYDNEKILNTPMKQLVDEGVISIKDVSAYERGIAAYKLLEKPAEKQKCRGIWVDGRPGCGKSTWAKEFGKARGGWYEKPQSKWWDGYEGEKVVVMNDVDNEALLHYMKIWADTFPCKGEVKGHTVWLKHDWFIVTSNFTIEEICRKKEDGHKFVDAMLRRFRVIHVPDNVEFLQYDNDEWENPDVPESQQPPAKKSPDHNTNEEEKRSDPLNTFIGSGYE	unclassified	CRESS-Rec2|und(circolike)	0.1
JF755401	Rodent stool-associated circular genome virus strain R-15	MSKLVNLSQTLLTYAQCDKKKEELLSFLKTLDFYECSIVAEEEHHTTEGKHLHAWVKFEHSIKLRSNRLNSMFDWEGKHPNIELVKNRKEDKLRVWKYVTKDGHYLEDNCNVDAMLNPKNKSKKYNTLHILETDPETLVRNEEISANSIKNILWAQQWWIGQKKPPYTTRCRGIWIYGRAGCGKSTWAAMFGDAMGGYYEKPQNKWFDNYAGQRVIILDDLRTDTLNYYLLKWADNKPVSAEVKGGKVWLRHLAFVVTTNYPIEHYCRNKDGTLDCETYEAIKRRYTYIQVDEGTEYLEYDPTFVWDVKECTLLETLHKKSPTLTDNSTEAPSDPTSCLDGSGYV	unclassified	CRESS-Rec2|und(circolike)	0.09
KM573768	Dromedary stool-associated circular ssDNA virus isolat DcSCV_c1322	MEKILDKKTQRSEENAKEKPFRFHSKSVFLTYPQCDKGKEWLLDFLKSKDAKLCVIGEEDHHETLGKHLHAYVEFNKKIDTTNPRYFDHDEFHPNIGMDKSNGKKNTKASKTDMIKYVIKDGNYIEHGIDVEDYLEAVKDKRAYIAKELMEGKKTLCEAVEEEPKLLYTLGTIQKNLTLFKAIKKESEFQGKRTCYWIYGTSGIGKSYGVRQIFPSIYIKDSNKWWDGYVNQDAVLMDDLDSEILQHHIKIWSDNYAFIGETKGGSISPSYNTFIVTSNFTIDELYKVEKIREAIKRRFRIINANDYIGEDGYFDFFRAKVEIDLVYES	unclassified	CRESS-Rec2|und(circolike)	0.05
KJ433989	Porcine stool-associated circular virus 5 isolate CP3	MSSVRLQNKNLFLTYNDPEETITGPAWLLNKLAEQLEKYQPYYGVCGEEKAPTTGTKHYHLLIMCKNPVISKNGQVIEIKGIAPHIEKIRNNLRGVIKYVKKDGNIAELNKNLCPVKLDKLERKEKADLMLTGDLEKAFIDGTLGPIEVIRAEKLRKIFQVYRKPEPYSKKLIMWYRGETGEGKTRTAVELAEEFELSYWITNESLRWFDGYNGQELVIIDDFRQKMITDWNFLLRLLDGYGLSVPVKGGYVAWKPKIIIITTPATPQEAFQWMNKDGELQNWDHLDQLMRRLTHDDEEQVYQFPLWEEDKQKLMNTVRQFLGIENDEAMVEEELSMSPILPEPTQIDEA	unclassified	CRESS-Rec2|und(circolike)	0.13
KM573764	Dromedary stool-associated circular ssDNA virus isolat DcSCV_c1000	MTRKQELFKRIICMIHLITLNMNHAFRLSNKKILLTYPQLNEDYTAQQFGEHFKWTFQNIINFNYIIACKENHQDQGHHYHLYFESEEPFRSTNERIFDLQFQIGTYHPNIEPVKRTPWKTVDYIKKDGDFWEYLPENAPKPALENMTKSEKNKFLKEHNPLELYDDGLLTPQQCAGLLKAKELIARARIDSVKRKDPPFVLWFWGSTGSGKTRTAIEIATDMGKEYWISHSEKLQWFDGYHGQEVVIFDDFRRNMCTFNYFLRLLDRYTMQVQVKGGYVNWIPKIIIITCPVDSSTAYTYFDIKTNEEREWDNLQQLKRRITDEICFDDYI	unclassified	CRESS-Rec2|und(circolike)	0.08
KT862237	Bovine faeces associated circular DNA virus 2	MSVRDYRSKNYLLTYPRCGLQQWWVLTNLQNNERIKMIIQYVIVAQENHQDGAEHIHVFLALTEPIRIKSNEMDVFDIVDEDEPDKRVYHCNIQSVKSPKDAIQYVKKNGHFITYGICPWKVPLTMAEKNELLQSKSLHELVESGMVSIFKIPQLQKAISILQNELGNVERQPPKVHWYYGSTGTGKTRTAYEEAKESEDGYWISHETGEWFDGYIGQGIAILDDIRAATWPLQKLLRLCDRYPIQVPIKGGFTWWRPREIYITAPGRPEDIYKNYTTGQPYDNIEQLNRRITEMIDFDSETEPIDQTLYWKG	unclassified	CRESS-Rec2|und(circolike)	0.03
KT862234	Duck faeces associated circular DNA virus 3 isolat 4_Fec60467_duck2	MEHHQQIIQTPAIYEFRGVRALITYPQCNDGNKEELLTFLKTIYNNKIDYIVVCKEDHHETDGEHYHAYIKFSTRAVVNANHLTYRGIRPNLEKVQSTAWKAVRYVKKDNNYIEEGTCTDVQKLTTQEKYKLIKEKTYIEIFEMATLSLPELCKVKQIQKELIVNDWPMNGSKNREVYWFYGPTGTGKTRKATEMMIQLYGEKWVSLTGNLRTFFDPYNGEKGVIFDDIRKGSIEWNTLLTITDRYRTSVNVKGSRIPWLAETIIFTSPQHFNDVFTTEKDGERAQWDGIEQFERRIKEVKEFN	unclassified	CRESS-Rec2|und(circolike)	0.11
KU203356	Porcine serum-associated circular virus isolate BR6	MNTPQEIIQTAAEYEFNGVRALVTYPQCNEGSIDELMTFFKSTYGNRIEYIVVCKEDHKETDGEHYHAYIKFNTRTRVCANKLTYRGIRPNLERVLKTPDRAVTYVKKDGNYKEEGTCTDVHKLTLQEKYKVIKEKTFKEIFEMASLNISELSRVKQLKKDLIENTWPMDGSKERRVYWFFGDTGTGKTRKATEMMIKLYGEDWVSLTGDLRTFFDPYNGEKGVIFDDIRKGSIVWNTLLTITDRYKTSVNVKGNRIPWLAETIIFTSPQPFTEVFTTEKDGERAPWDGLEQFTRRVYELREFK	unclassified	CRESS-Rec2|und(circolike)	0.11
KM821761	Sewage-associated circular DNA virus-26 isolat SaCV-26_NZ-BS4339-2012	MPKKGKFEFRTKAKLHSLTYPQCDIPVDFMMAALKKIAGDRWGWALIGAEDHAERTTDEFKHCGVHRHVMQQYECKSFDTVNVRYWDIEWNGKNYHPHFEPVKIKAKWLEYCMKDGEYIYEGDYNGAPFDPNTYFQANKSKQSYGFVWMANEIKAGKTLDELDDLVPGHVLQHKRKIEEYQEFQAKKKERRTPKPIFYGFNDVEDPQWQRVVKWANKNFLKKRSSKQKQLFLWSEAPNLGKTHPWAETLTEFFKCYNWVNSERQGKALMDCDYILLDEYKGMLTITDLKRNSQMMKWPVEIKYGDSTEFTRNVPMIITSNHDMRSIYKKCDYRDIESLEVRFKVVKVDTVCHLTLKGPPPVVLVPLPREQPTLVAVPENDKEDLSDEEEILSSLDDEDS…	CRESS-Rec2	CRESS-Rec2|CRESS-Rec2(circolike)	0.25
KU043433	Unidentified circular ssDNA virus isolate cg2186	LVGFLFSRTSDMWSGNKYKSMFFTWNAPDEDNTFEWCKRTSDELKSCVADYKFLYAYQWESEIGEDGRNHLQGVIFFTQRVQFMPFKNWLEEKMPDAKRIHLESVLSTDAALKYTEKDYKKYLNDPSHPVLFEFFRVELVKQRGNKNGRENASRAISECLAKYTSYREALLAEPDIIGRCTRAAIDYYTFKEPGTPRNNVEVLWFYGASGSGKTYTARKLLEYVAENLDSDKANYVQKYYTAAHNLQWWPGYEGQRAVLIDELRWESIKNTGFSYLLQLLGEGYIRVETKGGFVSFRGTWIIITAQDDPDTTFRHAQDNEGNRRQHENMGQLIRRLKRIIRFSGRYDSELNSYTTIRTDETEQYRREFNVLHQDANREELNTKQMFAEYFTQSTPANTE…	unclassified	und|und(circolike)	0.08
JF755416	Rodent stool-associated circular genome virus	MSVRSPRLSRRGSLALGVVTWNTVRQSGGATSRIRLPLGSAFSRSIRFKHEIACNLKFKWNKYFTISRFRMSEVTMWHRKKGPAKQENKGSKFFLTINYVEAGIETLKSDFQKIRDYMDVACTPNGAIEAVQFWEERGHETGNPHMHGIIMFKRSHRCRCPTVANLLVDTLGIQVRPHIEPLKDLRGALVLTNPDCAAKCRSVALDYFRFTGLSEHRRSAPEVIWIYGTTGSGKSRLAEAYCRKVAGEDYYFHAPGSLKWWDGYEEQSAVILDDLRRRHLREVGGFSYLLRILDRYDCQIEVKGGFRKNKYNLVIITGQRDPVAEFTYRGDNNEDIVEEDMGQLIRRLARIIELRVLDGVVQEIDHTDVLKQRFGVLSCG	unclassified	und|und(circolike)	0.11
KU043439	unidentified circular ssDNA virus	MQKHKSCCRVQRQDGKEGGMGKSRSGQGTGFFCLDPLGVKECVRNGSGRRTDLKTLLSQHTSLEECRRYRIQRQGQHRNKPREVTWIFGAAGTGKSQLAEAYARSKYGDGYFIHPPGNLKWWGSYGGQRCVVINDFRYRDVREAGGLGYLLNILDRYDIEVEIKGGFVYGDWDECIITSAYSPAGAFTYHKDGDDIVEENLGQLIRRLGRIIELVVEDGTVREKDRTEGFRGQFGCGTFTPLIRSDILGIRLRQDDGSALADGLGGME	unclassified	Circoviridae(circolike)|und(circolike)	0
KC339249	Bat associated circovirus 2	MAPKKKRSGPPPAKRWVFTLNNPSPKEIDHILGQDMNMFDYLVCGKEGMGEGKTPHLQGFANFSKKKTFNQVKKIFGSRCHIEKAKGTDKDNQQYCTKEGDVVVEAGAPRSGGQRTDLASAVSTVLESGSLRAVAESHPVQFVRYHRGLSELLKVAGKAKARDWKTSVHVIIGPPGCGKSKWACNFAEPEVTFWKAPRNKWWDGYCGQEVVILDDFYGWLPYDEMLRLCDRYPLTVETKGGTVPFLARTILITSNKVPQEWYSSESVPTAEALFRRITTLQLWKTTTTPSMESEEKFVTLDPPCEEFPYEINF	Circoviridae	-	0.69
DQ151643	Porcine circovirus 2	MPSKKNGRSGPQPHKRWVFTLNNPSEDERKKIRELPISLFDYFIVGEEGNEEGRTPHLQGFANFVKKQTFNKVKWYFGARCHIEKAKGTDQQNKEYCSKEGNLLMECGAPRSQGQRSDLSTAVSTLLESGSLVTVAEQHPVTFVRNFRGLAELLKVSGKMQKRDWKTNVHVIVGPPGCGKSKWAANFADPETTYWKPPRNKWWDGYHGEEVVVIDDFYGWLPWDDLLRLCDRYPLTVETKGGTVPFLARSILITSNQTPLEWYSSTAVPAVEALYRRITSLVFWKNATEQSTEEGGQFVTLSPPCPEFPYEKSSTVFFITS	Circoviridae	-	0.63
KJ641741	Bat circovirus isolate BtRf-CV-61/YN2010	MVQGRRRSGPPPHKRWCFTINNPTPAEERHLREIPVNQVDYLIAGREVGAQGTPHIQGFVNFVKKKTLNQVKLFVGPRAHVEKARGSDEQNRDYCSKDGDILVDVGCPRRPGARHDLASAVSTALSTGDLGQVAQSHPETYVKYHRGLAELIKASNKLPRRAWKTEVHVHVGPPGCGKSKWASEFADPEVTYWKPPRNKWWDGYASHEVVILDDFYGWLPFDELLRICDRYPLEVEVKGGLVPFLARTVIITSNKMPQEWYSSDAVPHAEALYRRITTLISWQTAMQPSTEDSAPQYLPQALTCPCSEFPYEINY	Circoviridae	-	0.61
KJ641742	Bat circovirus isolate BtRf-CV-62/YN2010	MVVGRRRSGPPPHKRWCFTINNPSPAEERHLREIPVNQVDYLIAGRERGAQGTPHIQGFVNFVKKKTLNQVKLFVGPRAHVEKARGSDEQNRDYCSKEGDILVDVGCPRRPGARHDLASAVSTALSTGDLGQVAQSHPETYVKYHRGLAELIKASNKLPRRAWKTEVHVHVGPPGCGKSKWASEFADPEVTYWKPPRNKWWDGYASHEVVILDDFYGWLPFDELLRICDRYPLEVEVKGGLVPFLARTVIITSNKMPQEWYSSDAVPHAEALYRRITTLISWQTATQPSMGDSAPQYHPQALNCPCSEFPYEINY	Circoviridae	-	0.63
JX863737	Bat associated circovirus 1	MEMAGHPCERYCFTINNYSEEDIEAVKAFLVPDNAEYAIVGKEKGENGTPHLQGFVNLKKKMRFNPFKAALGGRAHIEQARGTDLDNKRYCSKGGDLLLEVGEPGKQGKRSDLKEAVTLLNSGANMTAVARAYPEVFIRYGRGLRDYVITAGLSQQRAWKTEVHVIVGVPGVGKSRHVSEQHSDIYWKPRGKWWDGYCNQEVVCLDDYYGWIPYDDLLRLCDRYPLRVETKGGTVSFVAKKIYITSNKQIKDWYNFEELKVDPRALYRRVTSYKVMREGGELYDVVMTGDNKINY	Circoviridae	-	0.74
KJ020099	Mink circovirus	MIMAGHPCKRYCFTINNYLPEDEAAVKEFLTEANCVYAVVGKEVGESGTPHLQGFCNLKKKMRFEPFKRAIGGRAHIEQSRGTDVDNKRYCSKGGDLLLEVGEPSAQGKRSDLKEAVTLLNNGGTMTDVARAHPETFIRYGRGLRDYVIQAGLTKPRAWKTEVHVIVGPPGVGKSRHVQETAGENALYWKPRGKWWDGYTGQSHVVLDDFYGWLPYDDLLRLCDRYPLRVETKGGTVEFVAKVIWITSNKQVKDWYDYEELKVDARALYRRLTTYQVMRQGGELYNVQMTGDNKINY	Circoviridae	-	0.82
KP260925	Fox circovirus	MAQAQVDQGVRDSRRGNPIRRWCFTINNPTPEEEDAVKNLAPDAKYLICGREVGENGTPHLQGFVNLKKTTRMGALKSRLGGRGHFEPARGDDCSNQDYCSKGGDILIESGEPCKQGKRNDLHDAVSTLKETKSLAAVAAAHPETYVKFSRGLRELLLISPEMATPRKWKTEVNVLVGPPGCGKSRYCLETAPDAYWKPRGKWWDGYDGHSDVILDDFYGWLPFDDMLRLCDRYPLRVETKGGTMNFIGRRIFITSNKLPHEWYNDEIGNKAALYRRLTSVTVWDGGNFIPVPQFMFPYQINY	Circoviridae	-	0.68
KJ641727	Bat associated circovirus 5	MKASTPAYRWCFTINNWTSEEYGLIESTLRSSVKYAIIGKEVGEKGTPHLQGFANFKKKLRLSTLKKLPGFTRAHVERAKGTDLQNQKYCRKGNTYLEIGCPSSQGKKPELTVAVRKLQESNGDLVKIAKEHPEVYIRHGRGLRDYVNTAGLVGQRAWKTYVVVIVGEPGVGKTRYVNSECKECSVYWKPRGPWWDGYAGQEAVIFDDFYGWIMFDELLRVCDRYPLKVPVKGAFVEFVAKKVYFTSNKPPEEWYDKENIRGNIEAFFRRINEYLVIKGEVVEDGTPMYEINY	Circoviridae	-	0.77
KJ641716	Bat circovirus isolate BtPspp.-CV/GD2012	MRGSRGRGAVPVYRWCFTLNNWTEEEYGLIESTLRSSVKYAIIGKEVGESGTPHLQGFANFKKKLRLSTLKKLPGFTRAHVQPANGTDLQNQKYCQKEKNYLEIGLPSRRGRSGELSKAVDLLKKNGGNLSEVADVYPEVYIRHGRGLRDYVTAACLSGQRDWKTRVIVIIGQPGVGKTRYVNSQCKGHSVYWKPRGPWWDGYTNQECVVFDDFYGWVTFDELLRVCDRYPLKVPVKGSFVEFVAKFIYITSNEPPENWYDKENIRGKIEAFFRRIDEYLVIEGEEVRDGEPVYEINY	Circoviridae	-	0.75
KJ641711	Bat associated circovirus 8	MSTPRSGGSGGRRRLAPAYRWCFTLNNWTEEEYGLIESTCRSLAKYLIIGKEVGESGTPHLQGFVNFKKKLRLSALKSLPGFTRAHVESARGTDVENQKYCRKQGAYLEIGVPSSRGKSSTLTEAVATLQQNNGDLRAVAQMYPEVYIRHGRGLKDYVMTAGLVGQRSWKTHVTVLIGRPGVGKTRYVNREVEGKQVYWKPRGPWWDGYIQQEVVVFDDFYGWVTFDELLRVCDRYPLKVPVKGAFVEFVARAIYFTSNKPPEEWYDKENIKGSIEAFFRRVNEYLVVEDGEVREGAPAYEINY	Circoviridae	-	0.77
KJ641723	Bat associated circovirus 7	MLFVGPLIAPRTRPCGSSKRSTMGMARGSPACRWCFTINNWTEEEYGQICSFTEDKVKYLIIGKEVGREGTPHLQGFVNFKKKLRRDTLKKLPGFTRAHVEPAKGSDMENQRYCRKQGKYLEIGSPGLQGKSSALQEALKTLQENRGDLAAVATAYPEVYVRHGRGLRDYVNTSGLVPRRQSKTVVTVVIGPPGVGKTKYVNDCIGDLTSYWKPRGPWWDGYQQQECVVLDDFYGWVPFDELLRVMDRYPLKVPVKGAYCEFNSKKLFITSNKPPEEWYNEENICGTLQAMFRRFNEVFRMKSGGVIEPLTPQHEINY	Circoviridae	-	0.78
KT783484	Tadarida brasiliensis circovirus 1	MNVKRKYNAKKGDETPGRRWCFTINNYGAPDLECVNEAFRCEDVVYAICGKEKGAKGTPHLQGFIHFTGNWRFNRVRNLLGGRAHIEKARGNDDQNKAYCSKEETYLEVGTPQFQGKRNDLGRVASALESGATLSEVARASPEVFIRYGRGLRDYMNVRGLVKPRDFKTEVIVLVGEPGSGKSKYANELPGSKYWKPRGQWWDGYNGEDIVVLDDFYGWVPYDELLRIGDRYPLKVQVKGAFVEFTSKMLVITSNKRPEEWYDKEKIADQSAMWRRFDKMYYCERGEPVKAYPHEWKEFETGY	Circoviridae	-	0.75
GQ404856	Human stool-associated circular virus NG13	MESKRKKRQNPAKRWCFTLNNYTQLEAITIEQLLCTEEVQYAIVGEEIGENGTPHLQGFFNLKKKKRLTSLKAWLNDRAHYEEAKGSDEQNRRYCSKSGNILISFGSPQKQGQRNDLVLAAELLKESGGNMAAVADLYPSAVIRYGRGLQQYWQLIGFSARDFKTEVFVYVGPPGCGKSRAAAELGAASGGKVYYKPRGEWWDGYNGEATVIIDDFYGWLKYDELLRLCDRYPHRVPVKGGFVQFCSKRIILTSNIHVWMWYRFESYDASALMRRINVYKLWNGSVCTFDDLCDEKYNFLTPLKYNY	Circoviridae	-	0.81
GU799606	Barbel circovirus	MPKATSKTRHLQNPRQDAPRREQPVKRWCFTLNNPTAEERRHIQEIITADAVDFAVIGNEVGDSGTPHLQGFLNMKTKRRLGTMKKWFNARAHYEAAKGTDLQNDEYCTKGGDTYLRIGEPGKERCRNDLQKAIDVVKRSSGSMRAVAEACPATFIRYGRGLRDYANVMQYRKPRDFKTEVNVYVGDPGCGKSRKASELCAGTTVYYKPRGMWWDGYDGQENVIVDDFYGWMPCDELLRVFDRYPCKVPVKGAYVEFVSTNIYVTSNKHVWQWYKFEGFDPAAVMRRVNVYLVYDNAGERFVNLRESAMYDPVTMRYCY	Circoviridae	-	0.74
JQ011377	Silurus glanis circovirus	MPKYQKKSPGKENRSPVQRPKQARPPKKEAPHKRYVFTLNNYTTEEYARIDNVGADGLARYMITGKEVGENGTPHLQGFINLKVKKRFSQIKEMLGSRCHIEKARGTDLENRVYCSKEGSFQEYGSPVGQGKRSDLDAAAETLRTSLGDLRSVAELYPSQFIRYGRGLRDYASVLGLVKPRDFKANVTVITGPPGCGKSRYAADHASGTPYYKPRGDWWDGYHTNATVILDDFYGWIKLDEMLRICDRYPHQVPVKGGYVQFLARDIFITSNKPVEEWFPNCDCSALFRRINVYLTWNDECFVERIDTPYEINF	Circoviridae	-	0.85
KC469701	Anguilla anguilla circovirus	MSKVSVRRVCFTLNNYTEEDLKFIEEHFKSVSKYLIVGKKVGENGTPHSQGFINLKKKTHFNSVKKLLPRAHIEKAKGNDQHNKDYCSKQEVAFEHGQIQGQGKRNDLADALATVRANGGDIKALEDSHSLVYAKYKRGILACIDDFGWKKPRDWKTEVHVLWGIPGCGKSRYAREQAPEAYYKPRGEWWDGYTGQEDVILDDFYGWLKFDELLKICDRYPYRVPVKGSFVQFTAKRIYITSNVAASEWYHFQGYDPTALYRRMTSYLTWNDMCKEFRPMPININY	Circoviridae	-	0.79
JQ782200	Beak and feather disease virus	MTPLGVVISGGSHSLGTMPSKEGSGCRRWCFTLNNPTDGEIEFVRTLGPDEFYYAIVGREKGEQGTPHLQGYFHFKNKKRLSALKKMLPRAHFERAKGSDADNEKYCSKEGDVIPTLGIVARDGHRAFDGAVAAVMTGCKMKEVAREFPHIYVRHGRGLHNLSLLVGSRPRDFKTEVDVIYGPPGCGKSRWANEQPGTKYYKMRGEWWDGYDGEDVVVLDDFYGWLPYCEMLRLCDRYPHKVPVKGAFVEFTSKRIIITSNKPPETWYKEDCDPKPLFRRFTRVWWYNIDKLEQVRPDLLAHPINF	Circoviridae	-	0.59
HQ738642	Circovirus NGchicken38/NGA/2009	MAPCKSSTRTPPGRVSAAEGGARREATRRPPREAAAKRWCFTLNNPTEDEIKSLDSWLLSEFHYAIVGKEVGEQGTPHLQGFIHLKQKKRLSQLKQLFNRAHWEKARGSDEDNEKYCSKEGNVLLTLGIPARGNRSDLSGAVAAVKAGRAMTEVAREFSEIYVKYGRGLRDLKLLIGQQPRDFKTEVIVITGPPGCGKSRWAAEYPGSKFYKMKGEWWDGYDHQDVVVIDDFYGWLPFCELLRVTDRYPHKVPVKGAFVEFTSRVIIVTSNSPPDAWYSEEKCCVQALFRRINKWLVWNHDKFEDAPDCMKKYPINY	Circoviridae	-	0.7
DQ146997	Raven circovirus	MPPQKREAAAKRWCFTLNNYTDEEVSAVKAWNASEYHYAVVGREKGENGTPHLQGYIHLKKKARLSTLKKLLSRAHWEKARGSDSDNEAYCTKDGDVILTLGMPVEGNRSDLSGAVAAVKAGSRMVDIAREFSEVYVKYGRGLRELALLIGQKPRDFKTEFIVVTGPSGVGKSRYANEYPGTKFYKMKGDWWDGYSNEDVVVIDDFYGWIPFCELLRLTDRYPHKVPVKGSYVEFTSKVIIVTSNTHPDSWYNEEKCYLPALFRRINKWLTWNAIRFEDAPDCMKKYPINY	Circoviridae	-	0.7
KU230452	Avian-like circovirus isolate A1	MPPVRAAPAKRWCFTLNNPTDEEVQKIKDMNPSEYHYAIVGKERGEQGTPHLQGFLHLKCKKRLNQLKEFLARAHWEKARGSDEDNEAYCSKEGEVILTLGMPAKGNRSDLSGAVAAVKAGRAMSEIAREFSEVYVKYGRGLRDLALLIGQKPRDFKTDVILITGPSGVGKSRWAFEYPGSKFYKMKGEWWDGYANEDVVVIDDFYGWLPFCELLRLTDRYPHKVPVKGSYVEFNSKTIIITSNTHPETWYNEEKCYLQALFRRINKWMFWDAMRFVDAPDCVKKYPINY	Circoviridae	-	0.69
KP793918	Zebra finch circovirus	MPKQARSSPCKRWVFTLNNPTEQEVESVKSLPPSEYHYAIVGKEKGEQGTPHLQGFLHLKKKVRLNQMKQLIPRAHFEIARGSDEDNEQYCSKEGDVILTIGAPAKGNRSDLAGAVAAVKAGRPMTEVAREFSEAYVKWGRGLKDLALMIGQKPRDFKTEVIVLTGPSGVGKSRWANEQEGTKYYKMKGDWWDGYSNEDIVVIDDFYGWIPFCELLRLCDRYPHKVPVKGSYVEFTSKKIIITSNTHPNHWYNEEKCYMQALFRRINKWLFWDVFGFVDAPDAVKKYPINY	Circoviridae	-	0.67
AJ301633	Canary circovirus	MAPVRAAAAKRWCFTLNNYTAEEEAKVRALLPGEFHFAICGKERGEQGTPHLQGFLHFKKKQRLSALKKLLARAHWEKARGSDHDNEEYCSKENDVILTIGEPVQGNRSDLAGAVAAVKAGRRMVDIAREFSEIYVKYGRGLRDLALMIGQKPRDFKTEVVVITGPSGVGKSRLASEMEGSKFYKMKGDWWDGYSNEDIVIMDDFYGWLPFCEMLRLMDRYPHKVPVKGSYVEFTSKKIVITSNTHPESWYCPDKCYLPALFRRINKWMYWDGLRFEDVPDAMKKHPINY	Circoviridae	-	0.65
DQ845074	Gull circovirus	MRRRPRSGRYLRSIMAARRDSGARRWCFTLNNYTPEEEETARNLIHDADKYAFAIIGKEVGESGTPHLQGFMHFKQKQRLTALKKLFPRAHFEKARGSDQQNADYCGKDGEILTMIGTPSDNNPSDLAGAVAAVKRGSQMSEIAREFSEVYVKYGRGLRDLRLLIGCPPRDFKTEVIVLIGPPGCGKSKLANEMEGSKFYKMKGDWWDGYDNQDIVIIDDFYGWLPYCECLRLCDRYPHRVPVKGAYVEFTSKKIVFTSNRHVDGWWKGEIEKSAFYRRINVYKFYETGEFKDMPGHMLPHPINY	Circoviridae	-	0.67
JN377562	Bat circovirus ZS/Yunnan-China/2009	MPPAEKRDSAAKRWCFTLNNPTEQEVQTCSRFVEAEFHFAIVGREVGEQGTPHLQGFLHFRAKKRLSALKKLLQRAHWEKARGSDAENKEYCSKEGNVLTMVGHPCGANTTSDLAEAVAAVHAGRRMIEIARDFSEAYVKYGAGLHRLHLMIGSRPRDFKTEVTVLWGPPGKGKSRWAADLPGEKYYKMKGDWWDGYTGEEVVVIDDFYGWLPYCELLRLMDRYPHKVPFKGGYMEFTSKHIVITSNSPPNEWYKSIENKAAMYRRFTRVLTWYPEEMFGAPGLRDELPTTLPYPINY	Circoviridae	-	0.66
EU056310	Swan circovirus	MAKKSDYGYKRWVFTINNPTFEDYVSVIEFCTAENCKFAIVGEEKGEKEGTPHLQGFLSLRKNARAAALEENLGGRAWLSRAVGSDEENEEYCSKETTYLRVGTPNRKGRSSDLNAAASEVLAGALMTDVARKYPTTYIMFGRGLERLRQLIVETPRDWKTEVIVLIGPPGSGKSRYAFEFPAERKYYKARGKWWDGYEGNDVVVMDDFYGWLPYDDLLRICDRYPIRVEYKGGMTQFVAKTLIITSNREPREWYKCEVDCTALYRRIDRYLVMTPDGYMDAPEFMLPYKIKY	Circoviridae	-	0.71
KF941309	Duck circovirus	MASTSMAKSGNYSYKRWVFTINNPTFDDYVHVLEFCTLDNCKFAIVGEEKGANGTPHLQGFLNLRSNARAAALEESLGGRAWLSRARGSDEDNEEYCSKESTYLRVGEPGGKGRSSQLADATSAVLAGLPLTDVARKYPTTYVIFGRGLERLRHLIVETQRDWKTEVIVLIGPPGTGKSRYAFEFPAENKYYKPRGKWWDGYSGNDVVVMDDFYGWVPYDDLLRITDRYPLRVEFKGGMTQFAAKTLIITSNKEPRDWYRSEFDLSALYRRINKYLVYNVDKYEPAPSCSLPFPINY	Circoviridae	-	0.7
GQ404844	Cyclovirus PK5006	MANRTVRRFCFTWNDHPVEAYEKCEKFIEKFCKYGIVGEEYAPTTGMPHLQGFCNLNKPTRFSTIKKHLDNSIHIEKANGTDEQNQKYCSKSGIFFESGVPNKQGQRNDLQSLVEFIHEKRPTIRDIATEHPTTYIRYFRGIERMLQLVNPIKQRDFKTEVYYYWGPPGTGKSRRALEEAQAFNTESIYYKPRGLWWDGYEQQDSVIIDDFYGWIKYDEMLKIMDRYPYKVQVKGAFQEFTSKKIFITSNVDTDELYKFVGYTTAAFERRITNKEYMA	Circoviridae	-	0.86
GQ404846	Cyclovirus PK5222	MANRTVRRFCFTWNNYPDTAYEKCETFIQKFCKYGIVGEELAPTTGTPHLQGFCNLRKPTRFSTIKKHLDNSIHIEKANGSDEQNQAYCSKTGIFFEEGSPTKQGQRNDLQLLVDDVIGHPDIKTKDIAAKYPSTFVRYFRGIKELQRVVHPVAERMFKTEVYYYWGPPGTGKSRRALEEAQATGNGSIYYKPRGLWWDGYEQQDSVIIDDFYGWIKYDELLKITDRYPYKVQIKGGFEEFTSKKIFITSNVDTDELYKFNGYNTAALERRLTVKEYMS	Circoviridae	-	0.85
HQ738643	Cyclovirus NGchicken8/NGA/2009	MPRQTVRRFVFTWNNYPIEAYDKCEKYLTKFCKYGIVGEEIAPETGTPHLQGFCNLHKPTRFSTIKKHLDNSIHIEKANGSDIDNQKYCSKSGIFFETGQPSKQGQRSDLAVVSNKILEGSTTIRDIATQHPETYIRYFRGIRELQRLVNPISPRDFPTQVYYYYGPPGTGKSRTALEEAKKIDPTSIYYKPRGLWWDGYTNQKCVIIDDFYGWIKYDELLKICDRYPYKVQIKGGFEEFNSTHIWITSNVDTDLLYKFTGYCNAAFERRITIKKYFA	Circoviridae	-	0.85
KC512919	Dragonfly associated cyclovirus 7	MANAKIRRFCFTWNNYPLEAYTKCEEFIKNKCKYGIVGEEICPNTGTLHLQGFCNLHKPTRFNAIKRDLDNSIHIEKANGSDIDNQTYCSKSGIFFESGIPSKQGKRSDLMQVVETITKSEVPPTLEDIATKHPVEYIRYFRGIEKLQSILRPVCARRFKTDVYYYWGAPGTGKSRTALEEAEKITTTSIYYKPRGLWWDGYRQQTCVIIDDFYGWIKYDEMLKIMDRYPYKVQVKGGFEEFTSKHIWITSNIDTDLLYKFSNYSNVAFERRLTIKKHFIQLQ	Circoviridae	-	0.8
GQ404849	Cyclovirus Chimp11	MSNRTVRKFCFTWNNYEFDAYAKCETFLNNFAKYGIVGEELCPSTGTPHLQGYVNLIKPTRFSTIKKHLHNAIHIEKANGSDEQNQTYCRKSGIFFEKGEPIKQGQRTDLQLLVKDTMEPSNTLKDIATKHPIAYIRYFRGIQELRRMVLPVPPRNYPTEVRYYWGPPGSGKSRRALQEATEISTNGIYYKPRGQWWDGYEQQSCVIIDDFYGWIKYDEILKICDRYPYKVQIKGGYEEFTSTHIWFTSNVDTDLLYKFNNYINTAFERRITIKEHITLS	Circoviridae	-	0.82
KP151567	Cyclovirus NI-204	MNANVRRFCFTWNNYTEEAYKKCEDFINTYCKYGIVGEEIAPNTGTIHLQGFCNLHKPIRFNKIKKHLDNSIHLEKANGSDEDNQKYCSKSGIYFEKGTPCSQGHRSDLQAVVETIAQSNSTLQDIATKHPTAYIRYHKGIREYLRMVKPIQERQHKTLVYYFWGPPGSGKSRRALEEAKATNQPIYYKPRGLWWDGYNQQPNVIIDDFYGWIKYDEMLKIMDRYPYKVQVKGGFEEFTSERIWITSNIDTDTLYKFINYTNTAFDRRITLKCHML	Circoviridae	-	0.85
KC512918	Dragonfly associated cyclovirus 6	MNSTVRRFVFTLNNYSERELNQALFFINNYCKYGIIGEEIAPTTETPHLQGFCNLTKPMRFSTIKKHLSDRIHIEKAAGSDKDNQKYCSKAGKFFEAGRPQSQGERNDLAAVVDTIQSGANIKSVAEHHPAAFIKYHRGIKEYIRTIRPVPVRDFKTEVFYFWGEPGTGKSRTALAEAKGRALDSIYYKPRGLWWDGYEQQECVIIDDFYGWIKYDEMLKIMDRYPYKVQIKGGFEEFTSKYIWITSNINTDDLYKFEGYVNTAFDRRLSIKKHFN	Circoviridae	-	0.86
KM382269	Bat circovirus POA/2012/II	MSNPTVRRFVFTWNNYTSEDYDKCCEFIKSNCRYGIVGKEIAPTTGCPHLQGFCNLHKPMRFGAIKKHLHNSIHIEKANGSDEDNKKYCSKSGETFEQGHPHKQGERTDLQSCISDIQSGATIKKIAEDHPAVFIRYHRGIREYIRTVMPIKERDFKTEVYYYWGPPGSGKSKRALEEAKQRGTSIYYKPRGLWWDGYQQHDCVIIDDFYGWIKYDEMLKIMDRYPYKVQIKGGFEEFTSKYIWITSNVDTDDLYKFIGYKTDALERRITNKEYMD	Circoviridae	-	0.88
KC512920	Dragonfly associated cyclovirus 8	MCNSTVRKFCFTWNNYTEHDENKCKDFIAQYCKYGIFGKELAPTTNTPHLQGYCNLSKPMRFSTIKKHLHNSIHIEKANGSDEQNKEYCSKSGEIFEKGTPIKRGQRTDLQSLLADIQDGNRNIQTLAQSHPTTYIRYFRGIHTYLNLVHPIAPRNFKTDTYYYWGPPGSGKSRRALEEATARCNESIYYKPRGQWWDGYHQQEGVIIDDFYGWIKYDELLKVTDRYPYKVQVKGSFEEFTSKHIWITSNVDTCDLYKFIGYCTDAIERRITLKSYMS	Circoviridae	-	0.85
JX185426	Dragonfly associated cyclovirus 5	MANCVVRRFCFTLNNFTEEEYEKVTRFIQDYCKYGIVGNETAPTTGTIHLPGFCNLTKGMRFNNIKSKLATRIHLEKANGTDEQNQIYCRKSGTYFEKGTPVGQGKRTDLVSLVEGIQNGQIRLSDIAKDHPIAFIKYHRGIREYLQLTKPVQPRMFKTWVYYYWGPTGSGKSSRALKEAMEIEGEIYYKPRGLWWDGYHQQDNVIIDDFYGWIKYDEMLKIMDRYPYKVQVKGGFEEFTSRRIWITSNVDTDQLYKFIGYVSDAFDRRITNKVYID	Circoviridae	-	0.88
JF938079	Bat associated cyclovirus 2	MANSIVRRFVFTLNNYTDEHYTKCCAFITDHCKYGIVGKEVGEKGTPHLQGFCNLTKPMRFNAIKQHLHNTIHLEKANGSDEDNQRYCSKAGNFFEKGSPVVQGQRSDLSCVVDRIRDGKTITDIATEFPTQFIRYHRGIRELLQVIKPIPPRDFKTYVYYYWGPPGSGKSRRALEEARAIDKDSIYYKPRGLWWDGYKQQKNVIIDDFYGWIKYDEMLKICDRYPYKVQVKGGFEEFTSTRIWITSNVDIYSLYHFAGYNAEAIKRRCTSIIEIN	Circoviridae	-	0.85
HQ738637	Cyclovirus bat/USA/2009	MANATLRRFVFTWNNYNADDIEKVVKFIKEKCKYGIVGEEIAPTTNTPHLQGFCNLKTPMRFKSIKTHLHTNIHIEKAKGTDLQNQEYCKKGNKWIEEGTPCTQGKRTDLETLVSAINSGTNTQQKIAKEFPICYIKYHRGINEYLKLIHPIEPRKEKTWVYYYWGPPGTGKSRRALEEASQINSNSIYYKPRGLWWDGYHQQENVIIDDFYGWIKYDELLKITDRYPYKVQIKGGFEEFTSKRIWFTSNVDTDKLYHFIDYNNAAFERRITCKIHIT	Circoviridae	-	0.85
GQ404854	Cyclovirus NG12	MANSTVRRFVFTLNNYTEDQYQKCVEFISTKCKYGIVGKEVGEENGTPHLQGFCNLHKPMRFGTIKKSIDNAIHIEKANGSDIDNQKYCSKAGNFFETGTPSQQGRRTDLESLVAGIAAGANTTSKVATEFPAMYIKYHRGINEYLKLAFPIKPRTEKTWVYYYWGPTGSGKSRRALEEAQSINADSIYYKPRGLWWDGYHQQENVIIDDFYGWIKYDELLKITDRYPYKVQVKGGFEEFTSTRIWITSEKDTCDLYKYEGYNPASFERRITCKINITYEK	Circoviridae	-	0.88
KJ641715	Bat associated cyclovirus 8	MCDSTARRFCFTLNNYTEAEYQHIVEFINAKCKYGIVGKEVADTTGTLHLQGFCNLSKPMRFSAIKKSLNNRIHIEKANGSDEQNQKYCSKAGNYFEKGTPARQGQRTDLDKLVRAIQNGCNTTQMVAKEFPTAYIRYHRGISEYLKLSHPIKPRDEKTWVYYYWGPTGSGKSRRALEEARAINPDSIYYKPRGLWWDGYHQQDCVIIDDFYGWIKYDELLKICDRYPYKVQVKGGFEEFTSKRIWITSEKDTDRLYKFEDYNPASFERRITCKIFIDYKK	Circoviridae	-	0.89
JF938081	Bat associated cyclovirus 3	MANSTVRRFVFTWNNYCDEDFVKSCNYIKEFCKYGIVGKELCPTTGTRHLQGFCNLIKPTRFSTIKQRLHNTIHIEKANGSDEQNQNYCKKSGDFFEEGNPVTQGQRTDLKLLVADINEQGITNIKDIASRHPTAFIKYHRGIDTYLKLTHPIQPRNYKTWVYYYWGPPGSGKSKRALEEAQSINKDSIYYKPRGLWWDGYKQQENVIVDDFYGWIKYDELLKICDRYPYKVQIKGGFEEFTSTRIWFTSNVDTDLLYKFDNYNVAAFERRITCKINIV	Circoviridae	-	0.8
HM228874	Bat cyclovirus GF-4c	MENKTIRRFIFTWNNYTDDDYDKTCAFIKGNCKYGIVGKEHAPTTGVPHLQGFCNLSKPMRFSAIKKCLSNSIHIEKAIGSDEQNQKYCSKAGDFFEEGLPYTQGKRTDLEAVVRDMEQGTVRLEDIAAKHPCAFIKYHRGIDQLLKLIHPIKPRDFQTYVYYYWGEPGTGKSRRAKSEADAVNSASIYYKPRGLWWDGYRQQENVIIDDFYGWIKYDELLKICDRYPYKVQIKGGFEEFTSKRIWITSNVDIYSLYKFEGYNAEAFKRRITCMVEMNSNK	Circoviridae	-	0.85
GQ404845	Cyclovirus PK5034	MNSTVRRFCFTWNNYTVADTLTVKDYFVKYCKYGIAGEELAPETGTPHLQGFCNLRKPQRFSAIKKHLSDRIHIEKANGSDEQNQSYCKKAGHWFEQGVPVKQGDRSDLKSVVSTIADGANTAQAIAEKHPVEFIKYYKGISEYLRLLAPIAPRKFKTYVYYYWGPPGSGKSRRALEEAESLDPDSIYYKPRGLWWDGYRQQQSVIIDDFYGWIKYDELLKITDRYPYKVQVKGGFEEFTSTRIWFTSNVDTDRLYRFDGFTPEAFERRITAKIHIT	Circoviridae	-	0.85
HQ638049	Dragonfly associated cyclovirus 1	MREATGINAGTRANALVLIRVEPVTRMRRVNVTIRRFVFTWNNYTPSDFETCITFLDNFCKYGIIGKEKCPTTQTPHIQGFCNLSKPMRFNNIKKHLHNSIHIEKANGSDEQNKIYCSKSGEFFEKGHPDKQGKRNDLDAVVLTIQNGTNTISNVAKLHPISFIKYHKGIKEYINHVNPIRPRHYKSEVYYYWGPPGTGKSKTALEKATAYNTDSIYYKPRGLWWDGYQQQTSVIIDDFYGWIKYDELLKICDRYPYKVQIKGGFEEFTSKYIFITSNVDTCDLYKFRNYNTDAIERRITEKIHFKNIF	Circoviridae	-	0.84
GQ404847	Cyclovirus PK5510	MSNSTVRRFCFTWNNYTELNYALCQEFIKKYCKYGIVGKELAPTTNTPHLQGFCNLQKPMRFSTIKKRLDNGIHIEKSMGSDTQNQTYCSKSGEFFEAGDPQCQGKRNDLQSVVDTIQAGNGSLSSIANEHPTAYIRYFRGIQEYIKTVRPIPPRYHKTEVRYYHGPPGSGKSRRALEEATALASDLNDIYYKPRGTWWDGYKQQSCVIIDDFYGWIKYDEMLKICDRYPYKVQIKGGFEEFTSKYIWITSNIDTNLLYKFNDYNDTAFVRRIEIKLLIE	Circoviridae	-	0.83
KJ641728	Bat associated cyclovirus 13	MANSTVRRFCFTWNNYTEPDYEKCKTFIVELCKYGIVGKEVAPNTGTNHLQGFCSLKKPMRFSTIKKRLDNRIHIEKANGSDDDNEKYCSKAGDFFVSGDKDKQGARNDIQAVISAIQNGEVTTPKMVAAVYGSVYIKYHRGIEKYLSLLRPVPERNFKTELRIYWGPPGSGKSRRALEEANSLGSSVYYKPRGLWWDGYEQQDSVIIDDFYGWIKYDELLKICDRYPYKVQVKGSFQEFTSKYIFITSNTDIYSWYKFPGYETAAIERRAEIHEYIGG	Circoviridae	-	0.85
GQ404855	Cyclovirus NG14	MALADVRGMANSTVRRFCFTWNNYSELEYVLCCEFIKKYCCYGIVGKEIAPNTGTHHLQGFCNLEKPMRFSTIKKRLDSRIHIEKAAGSDSENQTYCSKTGNFFESGTPNQQGRRTDLQAVVSAIQNGEITTPKMVAELHGAVYIKYHRGIEKILHQLHPVPPRDIPTELRVYWGPPGSGKSRRALEEARTLGGSIYYKPRGLWWDGYEQQNCVIIDDFYGWIKYDELLKICDRYPYKVQIKGSFQEFTSKYIFITSNVDTCDWYKFAGYNVNAIERRITIKEYMD	Circoviridae	-	0.81
JF938082	Bat associated cyclovirus 4	MANSTVRRFCFTWNNPTELDFALCSEFIKKYCKYGIVGKEIAPTTGTLHLQGFCNLQKPMRFSTIKQRLDNRIHLEKANGSDEENQKYCSKSGDFFEEGSPGFPGRRTDLESLVSSIKNREVTTLKGVAEMHGACFIKYHRGIQAYMQQMVPIQPRDFKTEVYFYWGPPGTGKSRRAAEEARTRFPNNPDTGRDEVYYKPRGLWWDGYEQQKAVVIDDFYGWIKYDEMLKICDRYPYKVQIKGGFQEFKAEAIWITSNVSIDLLYRFTGYDPAALQRRMTCIDYMD	Circoviridae	-	0.85
KJ641712	Bat associated cyclovirus 6	MSRTSVRRFCFTWNDYTLEDCATVEKFITEYCKYGIAGEEFAPTTNQPHIQGFCSLHKPMRFSTIKKRLHNTIHIEKANGSDEQNQTYCRKSGAYFEKGTPCFQGQRSDLRAVVSAIQSGKNAAQVAKEYPLEYIRYFRGIQELDLITNAKPPRFYKTWVYYYWGPPGSGKSKRALQEAQSLDEEIYYKPRGKWWDGYNGQDCVIIDDFYGWIKYDELLKITDRYPYKVQVKGGFREFTSRRIWFTSNVDTHELYKFIGYNNTAFERRITCKINIV	Circoviridae	-	0.87
KJ641717	Bat associated cyclovirus 11	MTSRNPSLRRFCFTWNNYTEDDIWTVQTFITTQCKYGIFGKELAPDTNTPHLQGFCNLVKPMRFSAIKELLSHRIHIEKANGSDIQNQAYCSKAGEVFESGTPSSRGQRTDLNAVLDDIRGGETSLARLATAHPCTYIRYFRGIENYLKLVHPILPRDFPTVVNYFYGPPGSGKSKRALEEAQEKSPCSIYYKPRGLWWDGYRQQDCVIIDDFYGWIKYDEMLKIMDRYPYKVQIKGGFEEFTTKFIWITSNVDTDKLYKFEGYNPEAFNRRLTTHVRFVFPEEPTSAGP	Circoviridae	-	0.86
KF726984	Human cyclovirus	MNSVVRRFCFTWHDYDCEDVAKTESFINTHCKYGIFGKEVCPDTRRIHLQGFCSLAKPKRFKWIKEQLSNRIHIEKAMGSDKENQQYCSKSGEFFEKGSPSEGSGQRTDIQSLLETIQGGEHDIRRIAEKHPACYIRYYRGIRSYLNLVAPVSPRNFKTEVRYYWGPPGSGKSRRSLEESSGLLDGTVYYKPRGEWWDGYMQQTSVIIDDFYGWIKYDELLKICDRYPHKVPIKGGFEEFTSKYIFITSNVDVCDLYKFNGYTTAAIDRRITIKENII	Circoviridae	-	0.79
JX185423	Dragonfly associated cyclovirus 2	YRHFVAMGCAGATRGGGITRPVARSARSLSRIERRLRSTLPGSRSRSIRYTFNSMNSTLRRFCFTVNNYDAETELKVKNFLTNNCKYGIYGRELCPTTKTPHLQGFANLSKPMRFRKIKESLCDTAHIEKANGSDEDNKTYCSKSGEFFETGSPCQQGRRSDLDAVVATISTGERDIRRIAEKHPNCYIRYGRGIRSYLELVNPIPPRYFKTRVVFFYGPPGSGKSRRALAEAQAIDPDSIYYKPRGEWWDGYHQQTSVIIDDFYGWIKYDDLLKICDRYPYKVPIKGGFQEFTSKHIWITSNVDTPLLYKFENYNVAALERRLEIKELIE	Circoviridae	-	0.88
KF031465	Cyclovirus VN	MAKNSTVRRFCWTLNNYTEEDVDVLQKDLTELCKFAIFGRETCPSTGTKHLQGFCNLQRPKRFNSIRQIFGGRAHIERAKGTDLENKEYCSKGGDVWECGTPCAQGTRTDLEKVVSVIEGGERSLKNLAIQFPIAYIKYYKGIEQYIRIAHGNSERDFKTEVFYFWGPTGTGKSRKAREESLALGDTYYKPRGEWWDGYTGQPCVVIDDFYGWIKYDELLKICDRYPYRVPVKGGYENFVSKYIWITSERCLEEVYRFIGYDCSSLRRRLNKEIFFGYIMSHLLTSKILLII	Circoviridae	-	0.85
GQ404857	Cyclovirus TN25	MAVSSRKQTNSTLRRFCWTLNNYTEEDVTTLQKDLAELCKFAIFGRETCPNTGTKHLQGFCNLQRPKRFSSIRKLFKERAHIEKAKGSDFDNKAYCSKSGEVWMHGEPSSQGARNDLQEVVSVIEGGERNIKAVALQFPTTYIKYFKGIEQYIRICHSSAERDFATQVSFFWGPTGSGKSRRAYEEAKATGEPIYYKPRGEWWDGYCGHANVIIDDFYGWLKYDELLKICDRYPYRVPVKGGYENFVTKRIWITSEKPLEQIYRFIGYDCSSIRRRLNTELYIGYE	Circoviridae	-	0.85
KC771281	Human cyclovirus VS5700009	MANSTIRRFCWTLNNYEEDELASLQKDLAELCKFAIFGREVCPTTGTKHLQGFWCNLQRPKRFNSVRRIFGGRAHIEKAKGTDLDNKTYCSKSGEVWMHGEPSTQGARTDLQEVVSCIEGGEKNLKRLAIQFPVAYIKYFKGIEQYIRIAHGSGERDFKTECFFYWGATGLGKSRAAREESKATGEDTYYKPRGEWWDGYCGQPNVVIDDFYGWIKYDELLKICDRYPYRVPVKGGYENFCSKRIWITSNYPLDTIYRFLNYDKGPLERRIDVIKHFE	Circoviridae	-	0.83
HQ738634	Cyclovirus PKbeef23/PAK/2009	MAPNKTLRRFCWTLNNYTEDDVDQLQKDLPELCKFTIFGREVCPTTGTKHLQGFCNLQRPKRFNNIREIFKGRAHIEGAKGSDQDNQRYCSKSGEVWSHGEPCNQGARSDLEEVVSIIKGGERDVKAVALQCPTAYIKYFKGIENYIRIYHATPERDFKTEVYFFWGPTGAGKSRTAREQALATGLRVYYKPRGDWWDGYNGHECVIFDDFYGWIKYDEVLKICDRYPYRVPVKGGYENFIAKKIWFTSNKPLEQIYKFIDYEPSAWRRRLTVEREFFYE	Circoviridae	-	0.87
KR902499	Cyclovirus Equ1	MAQKKGWCFTYNNYDEQTLNGIFNRCEDICKFIVVGKEVCPTTGTKHLQGYCLFNERKRFASVKEAIGGKSHIEPAKGSPQQNYDYCTKSGDYETRGTLPKGKYSTLYMVCEELKSGTPLRTIALNEPETFVRHHRGLQRFTEILGESTLRDWKTEVIVYIGETGTGKSRKCAELCGSTPTYYKPRGKWWDGYTGQPNVIIDDFYGWIKYDELLRITDRYPHRVPVKFGYQQFLAKTIYITSNKPMKEWYTFDISALERRITNVTLFKKLK	Circoviridae	und(circolike)|Circoviridae(circolike)	0.73
KP153414	Lake Sarah-associated circular virus-14	MPSSYRRVVFTLNNYTNEILTSICNYAESNCRYAIIAKEVAPTTGTPHLQGFLHFKNPKTHKTLGKVLPGGHFLHAKGSDEDSQVYCSKEDPSPWEFGTMCHQGKRSDLDDAILTLNESGGDLKRVAMEHAGAYVRYHRGFAAYKSLVCATAPRDFKTKLVVLFGPPGTGKTRAAYELAGENPYPKPRGEWWDGYCGNNGVIIDDFYGWLKFDELLKISDRYPYRVPIKGGYENFCSKIIIITSNIDISKWYKFDGYDPAALYRRCTKYLRCEKDVFCSMEDDYLVKINY	Circoviridae	-	0.85
KM821758	Sewage-associated circular DNA virus-23	MTSRKWVFTVNNYTDDEWNELKRWCMVNTKYAIMGKEVGPQCGTPHIQGYLSANKPHRRSGMVEVCRRARWEAAKGNDTQNDDYCRKAAKEGREVWRHGQPCTGAGQRTDLLRVAAAVDSGVSLREIASENPSEFIKFHRGILAYRNLVRPAVPRDFKTELHVFVGPPGSGKSRRAQELASSFGTVYRKVRGPWWNGYEQQQSVIIDDFYGWVPFDELLRVADRYQHQVEIKGGFEEFNSKIIIITSNRPIKDWYKFDSYDPEALYRRCSVYQHINMDHSVTDYEIMEGIKINY	Circoviridae	-	0.82
KT732785	Pacific flying fox associated cyclovirus-1	MPGEPKSHRRYVFTLNNYSDDDVARLQQLEARYMVFGKEVAPTSGTKHLQGFINFGRAVRFNSARKLVGGDGVTEVTDRAASGGPNGDCFDYLPHGNDPATRGFVFLGKPTSQGRRTDLQRVADLAKQSGTTAHTIAREFPVEFIKYGRGITNLLRTINPIPSRSKPTIVVVLVGAPGVGKSRFANEVGSGLGDTYYKPRGEWWDGYCQQRSVIIDDFYGWIKYDELLKICDRYPHKVPVKGGYEEFTSEYVFITSNSNVDQWYKFDNYSPAAIHRRLSVYVGLMCDGSTAHFPEWSPKFSWFDSAWTTMQIKWTVHDMVNKV	Circoviridae	-	0.75
KT732786	Pacific flying fox associated cyclovirus-2	MPGDKPNKSHRRYVFTLNNYGPEDESRLANLDGRYLVYGREVAPTTGTKHLQGYINFGRAIRFNTAREMVGGSGVTEVSVWGAFGPPNGVCFDYLPHGNDPATRGIVSLGKPTSQGRRTDLQRVADLAKQAGTTAHTIAEQFPVEFIKYGRGITNLLRVINPVKSRTKPTNVIVLVGTPGVGKSRFANEVGSALGDTYYKPRGEWWDGYYQQRSVIIDDYYGWLKYDELLKICDRYPHKVPVKGGYEEFTSEYIFITTNSLIDLWYKFDKYTPKAILRRLAVYVTLMEDADPMHYDPFSPQQEWFNVQWQQCIVNWTLQDMINKI	Circoviridae	-	0.69
KJ641714	Bat circovirus isolate BtRp-CV-14/GD2012	MDLQNARRSRWCFTVNNYTTEHIEQLRKLGSTLLTSGYLIFGYENAPTTNTKHLQGYIRLNKPKLFRQLQLLLPPATHIEATKGTERQNFRYCTKSGVFEEFGIQRTQGQRTDLEQAVHELLHENGTILQVATNNPTVYVRNWRGLHELRNLLIPVKPRDFRSNIYILYGPTRTGKSRAAQKIAGDTSTYYKNRSNWWHGYHQEETVIIDDFYGWIKWDELLKLCDRYPYKVETKGGYEEFTSKTIIITSNLPPEKWYKFENFDPTPLISDRINAIVETGGTQIKIKTYYETMKTSDIEIINKSFNFINP	Circoviridae	-	0.73
KP153523	Lake Sarah-associated circular virus-27	MDPQGRGWCFTLNNPDDLDVLLPQSWDPDSYDYLVYHLEMGAEGTAHLQGYLYFGSRIRFSQLKKWFPGSRVHLEAAKGTAVQNQRYCTKEEGRLEGPWEFGSLPDQSQGKRNDLLAVKADLDAGASLLEIADDHFSAFVRYHRSFKEYKLLKAPVANVAKKIIVVWGPTGTGKTRWAFDNYPSAFWKTKSGGSQQFWDGYDGESVIIVDEFYGWLPFDFMLRFLDRYPVKLEIKHGTVPLCADTIIFTSNKHPSEWYHIQRYKWDESNPLRRRLTSVRELRADGFGPDESSPGFSSSVAVVAPVFTTTTTTTTTSAGGLDDVPRFRNGYPAPTVTDLYKDL	unclassified	und|und(circolike)	0.39
KM874346	Avon-Heathcote Estuary associated circular virus 18 isolat AHEaCV-18-NZ-4778GA-2012	MTARNWVFTINNHFSIDLEEETWNNNLKLLIAVKEVGEQGTEHLQGYLELIQPRRFSWVKERLPLAHLEKRRGSKKQAIQYCLKTISLPSQQCSSPSNTSDTSPQDVDSTIPLTIIYPPDMNLSDLYADYCRSKQTKRQILLAEVRQKLSEGVDDLTIANEYFDVWVSNYRAFERYRTLITPPRNHEVNVIVIQGPTGTGKSKWCLDNYPNAYWKQRSNWWDGYSGHDTVIIDEFYGWLPFDLLLRVCDRYPLLVESKGGQIQFVAKTIIITSNSVPSSWYRNSYFDSFVRRVSKWMVFPIWGDQLSFTDYSEAIAHFVNNY	unclassified	und|und(circolike)	0.41
KM874353	Avon-Heathcote Estuary associated circular virus 23 isolat AHEaCV-23-NZ-2161TU-2012	MTARNWCFTLNNPTEHIDFKSEKWMDLKLAIYMMEKGETGTPHFQGYLEMKEPQRMSFFKKLMPRAHLEKRRGSKQQAINYVLKTMDPECSQWEITMTGEQPIITGLPVAIHCKGTPHDLLKSCEPKKSLKERLEDVKELIRSGYNDEQIMESHYDLFVRYHRAFALTRRIMSSPRDHEMKVIVCQGPTGTGKSRWAKETYPNAYWKQRSQWWCGYEGQDTIVLDEFYGWLQYDLLLRLCDRYPLYLETKGGQVNCKAKTIVITTNATPESWYKTEKYFLSFIRRVSEWRVFPIWGEMETYVLYSEAVSKFFLNTE	unclassified	und|und(circolike)	0.33
KM874332	Avon-Heathcote Estuary associated circular virus 14 isolat AHEaCV-14-NZ-3348C3-2012	MSGRNWCFTINNPELTDYPEQWPVTHLKTILYQVEMGEEETLHLQGYLEIDSPRAIGWLKGLNGRAHWERRKGTRSQAILYCCKEDSRLVRPRLWTSRDLSWEDLDPDSLTSCLNSRGITLATSESGNCGTSSRLLEIKEKLSERSSSIEEIADEHFDLWVRHYRAFEKYMTMKAEPRNWECEVHVLYGPTGTGKSKWAMDEYPGAYWKQRSKWWDGYVGHETVIIDEYYGWLPFDLLLRLCDRYPLLVESKGGQLQFVAKTIIFTTNKCPDQWYNSDSCYFPAFERRVDKWHYLPSLGFHSRFTRFKEFKDVTS	unclassified	und|und(circolike)	0.34
KR186219	Asterias forbesi associated circular virus isolate SS-2A	MKSRNWIFTINNELIWKPENHLIKFVVYQLEEGEKEKVPHIQGYLELKQPRALSWMKKLNSKAHWEIRKGNRVQALQYVTKEETRMDAPWILNCGQWSQYDASTWTRVEDWLNTVIPGVWKDGSKSTKSIRLSEIKSKLDDGCSSEVIADNYFEDWVRHYRAFEKYLLIKSKPRDYPVRVVVVIGPTGTGKSRFCMEQYPDAYWKQRSQWWDGYVRHKTIILDEYYGWLPFDLLLRLCDRYPLMLETKGGQCNCEANTIVITSNNRPDSWYKNCYFPAFERRVDTFIIMKELGSSFIFKKWSDAEKHTDPLILN	unclassified	und|und(circolike)	0.32
KM874329	Avon-Heathcote Estuary associated circular virus 13 isolat AHEaCV-13-NZ-3331CO-2012	MTCRNWCLTLNNFTPEEEEVLKEEKPWIKFVVYQVEMGESGTPHLQGYIETNGGVRMSKMKRMLERGHWEQRLGSRAQALTYCLKEDSRVRGPYLIGLSQEELNSYLKKNPKSTDLNVIKDKIKAGASELDVADAHFGSWVRYYKAFERYRCLNTKKRSTIDKVIIIVGPTGTGKSRFCMEQYPDAYWKQRSNWWCGYSGESTIIIDEFYGWIPFDMLLRLCDRYPLLLETKGGQCQCVATTIVITSNHHPNTWYKNSYVESLYRRFTNIIYMPALGVSEHLNSIEDLHLNYFNFPPN	unclassified	und|und(circolike)	0.32
KP153506	Lake Sarah-associated circular virus-48	MAKARNWIFTDNNPEHDEPSWTDTVKYAIWQKERGENGTEHLQGYVEFEGPKSLTYCKTVLPRAHWEIRRGTQQQAMDYASKEATRIGGPWTHGVLTVNAQGTRNDLLALKQALDEGTSMKQIAQEHFITMNKAHKWAYLYRSLTMGQRDWITRVYILIGPSGCGKTTFCKRNCKDAYWKLQHSGNNEWWDGYDGQRDVVLDEFYGWIKWNTLLRLIDSSPLRVEIKGGSTQFIARRLFITSNRDIDSWYPNIMDKSALDRRIREFGVVITDFNQDIIDN	unclassified	und|und(circolike)	0.27
KJ641713	Bat circovirus isolate BtRp-CV-6/GD2012	MASRNWVFTDNNPSDDTPSWPEAVKYAVWQKERGENGTEHLQGYIELQTPRRLPFVKGILPRAHWEIRRGTQQQARDYCTKEDTRIAGPWTHGELHINTPGQRNDFLALKEAADNGMSEKQLWLEFPAVMDRSWRSITRYRSLTTNPRDWVTRIYLLIGKPGIGKTRFCRRIAPNAYWKQCDTKWWDGYDGHEDVVLDDFYGWIQFRTMLRLCDRYAEMVESKGGQHQFLAKRLFITSNGEPREWYPNIPDNRFDALQRRLDEFGTRITDLTQTLLE	unclassified	und|und(circolike)	0.31
HQ335087	Mosquito VEM virus SDRBAJ	MPKSAPEKKYRNWVFTYNNPPQPYGNLAIEGSKYFTYQLERGAAGTEHYQGLVVFTNRVRFATVKALLPGCHIESMKGTLKQAIAYCHKDDTRIDGPWAVGDVPPGSGARTDLLALKEAVEEGKSEKEIADEHFCSWIKYYKGIERYRRIVVAHRTWATETLVYWGPPGSGKSRHAFELGGDDQFWVVRPRDRGGSVWWDGYEGQSTVIIDEFYGWLARDLLQRLADRYPLVVETKGGAVQFLAKRIIITSNSPPESWYKSGLGAMGRRLQAPLGYVFYVGTPECDEATYRQQLDEVGSRSDSFPGGAVGAGPVRSEERDVVNMDGVAVPPNFA	unclassified	und|und(circolike)	0.21
KJ641733	Bat circovirus isolate BtMf-CV/SAX2011	MGGSTGKGRYRRWLFTLNNPTCEGDKLFESNKTNIRAATWQLEKGETTGTLHFQGYIQFNKAMRMASVKEILPTAHWTAANGTQEQNIAYCNKEDTREQGPWTIGDWADKEATNTPLQAVKQAIDQGATELEIAENYFSEYVRYGRGLMQYKLLKTEQRNWQTELLVICGPPGTGKSRVAREMAPDAYYHSTGQWWDGYCAQRVVIMDDFYGTIPFSQLLRLADRYPTNVERKGGVVPFLSRSIIITSNKKPSEWYNLLQYNLHALYRRITLYMWLDMHEENSVCTEGFIE	unclassified	und|und(circolike)	0.39
KM821757	Sewage-associated circular DNA virus-22 isolat SaCV-22_NZ-BS4155-2012	MTSRRWCFTQNNPTEDEQVHLLWETWPHLRGGVCQLEQGDNGTPHYQGYISLDRPTRLAALKKLLPRAHWEVARGDATANIVYCTKEEGRIDGPWRIGEIVDQGHRTDWDKLHQDIKDQLSDQDIADRNFRLWIQHRSGIDAYRALHSRVRDEKTEVVVICGPPGTGKSSTARELAPDAYWFPGGKWWNDYNGQRVVVIDEFVGTIQFTLLNRILDRYPLQVETKGGMRNFTSKLIFITSNKKPYEWYGPENERGALYRRIDWYMWLDRLENFCIWKKGYNEDY	unclassified	und|und(circolike)	0.36
KJ641721	Bat circovirus isolate BtTp-CV-3/GX2012	MACARTWCFTWNNPPDLNDTVTLVQFDWSVFGDSLRYGVAQLERGESGTIHWQGYVEFTKPRKLGGLKKAIPAAHWETRRGTQTQARDYCMKAEGRVSGPFEFGDFKDGGQGKRTDLVSAMDLVKAGKTDLQIAEELPSVWLRYSRGLREYKRICVPSRKTKTHVSVYYGPTGTGKTRRAFESDPDAYFKPRGDWWDGYEGKATVIIDDFTGWLPYSFLLNLLDRYPLLVPYKGGFHNFGSTKIIITSNFKPSEWYNDKVKHPDAPLLRRIEEVVEFEENAPPMTARDVDLITSQEIRELEL	unclassified	und|und(circolike)	0.33
KJ641731	Bat circovirus isolate BtRp-CV/SD2013	MSKERSYCFTSYAAQLSIDEKAQNLRYCVYQQEKCPDTGRLHLQGYIELLSPTRITAVKTLLGDPAVHLEKRRGTREQARDYAMKEATRITGPWEIGTWTGGGAGARTDLINLQKSLDSGDSMQAIGESHFPLFLKYQKGIQAYMNLKIPDRSLTTYATVYWGPTGTGKSWRALQEAGANAYWKDPTTTWWDGFNGTQNVVVDEYTGQWPIEYLLRILDKYPLQVQIKGGMVKFAAPHLWLTSNLEPEEWYPTAKACQREALRRRLTNVVQLADVYIEPLDIKEDPVVDLLELML	unclassified	und|CRESS-Rec1(circolike)	0.15
JX559621	Circo-like virus-Brazil hs1	MSYRFWCFTEYEDEKVQNYEEWFNRLFNSEAGIDYICGQRERCPNTGRLHIQGYVVFTRKKRLNGAKEGLDSTGVHLERRMGTHRQAVEYCQKEESRDGEFIELGEYDDRGSQTKCMEEIKKRIREGDSELDIAEEYFGIWCRYNKAFSKYRAMVQPGRDFKTIVRVYWGRSGVGKSRRATYECGPDAYRKPLGEWWDGYNGTSNIIIDDFYGWLRFDELLRCLDRYKHSVPIKGGFVNFAPELLIITSNVEPREWYNREKISDFRFDALVRRLDVVELMEDDWIEP	unclassified	und|Circoviridae(circolike)	0.1
KF133820	Circoviridae 13 LDMD-2013	MSKYWCFTLNNYTREEEEAVKALCEGESPIADYLVYGRERGEGEDTPHLQGYIEFKNRKRFSTVRTVIPRAHIERRMGSASEAAAYCKKDEDFFEHGVISQGQGARNDLARLHEAIFVEQKSVAHVQEEYFGSYIKYHRGIEKVLQQRAKPRTWKSRVVVYWGPTGTGKTRRCFASSDPPTWIYSSDGWFDGYQGDETVLFDDFGGHEFRLTHLLKLLDRYPMRVKVKGSFVQWCPKTIYITSNIEPAFWYPNAREVHREALMRRIDDIEEMADEWVPPVPVENEVIDLTDE	unclassified	CRESS3(circolike)|und	0.21
KR528563	Calanoida sp. copepod associated circular virus	MVNSGKHWCFTLNNYTPEEESSIKLVDAVYLVYGRERGESDTPHLQGFVSFDKRRTLRQVKELLSDRVHLESAKGTPRQASEYCKKDGDYYEVGILPGGRGTRTDLESVRELIKSGGSIRDVFDKHFGVALRYHRGISMAINLRGDKREWVVDVQVYWGDTGSGKTKKAWTEAPDAYVHPGGQWFDGYTGQPDVIFDDFSGSEFKLTYLLKLLDRYPMQVPVKGGFVNWVPKRIFITSNLDPRTWYKDAIQEHQAALMRRITKITHFTIPFH	unclassified	CRESS3(circolike)|und	0.13
JX904473	Uncultured marine virus clone SI00850	MAASKHWCFTLNNYTDLDLERLRELGEHEDTKYLTYGKETGDSGTPHLQGYICFNRRLRFNPVRRSIGARAHIEKTKGSPAANKAYCQKDGDFEEFGDAPSSQGKRSDLDCVYDAVKEGGTRASIGDTFKGTYIRYKRSIDQLLREVKQTVREPDDEPNVIVYWGLTGTGKTRKVWESHPRDSIYVHTGERWFDGYEGHEVALFDDFDGSSFKLTYFLRLLDRYPMTVPIKGDYVQWNPKIIYITSNKDPVDWYSGASNEHQDALMRRLTHIQNF	unclassified	CRESS2(circolike)|und	0.21
KF133827	Circoviridae 20 LDMD-2013	MPRVRAKRWCFTLNNPTDQEKDFMARLQLGELPTASNMKLTYLCFGREAVSTPHLQGYLELEKKSSLSSMKTFLTRAHWEKAKGSPKEAADYCKKDGDYEEVGKLSVGQGYRTDLLNVKEVLDGGATVAELADSHFRLWVQYRRSFKAYVDLKATPRRWKTVVVVLWGDTGTGKTRFCHDQTGDRSMWTSGDYKWFDGYDGQEVVLWDDYRGEYPIQQFLKLTDRYPMNVPIKGGFTNWKPKKIYITSNCCPSTWYKDVGSRTHEAFMRRLDVINFINKPIY	unclassified	CRESS3(circolike)|und	0.33
KF133818	Circoviridae 11 LDMD-2013	MPTPRGVYWCWTLNNYTPEELSHCRTLCDRAEDVTYVCFSREVGDSGTPHLQGYLELAAKLRLGGLRKLDGLGRAHLELRKGTQAEAIDYCRKDGNETFEEHGTRKTSSQGKRMDLEAVKALLDGGAPLREVADQHFGTFVRYGRGIAQYQLVTAKKRARDVSVHVLWGAPGVGKTRWIFERHADDLWICNDPTLQWFDGYQGESVVLIDDFRGEASPAFMLRLLDRYPLQVPIKGGFTEWRATTIYITSNVAPPFGMESIVAPLARRLSIVQELPKQEYDITEAALNEIFN	unclassified	CRESS3(circolike)|und	0.29
KF133821	Circoviridae 14 LDMD-2013	MPGRQSRRWIATLNNYQESHLSALSSLVPDSLNYLLYGKEVAPSTNTPHLQIYLETQKKKTLNGLKKLLGIKSIHLEIAEGTQQQNLIYCKKDGQFFEIGKLMESGTKKSITEVSHAIANGANVTEIARNYTETFIRYPRGIERAINLLNNEARDFKTFVKVYYGKTGTGKSYKAHQENPELWTHGGDRWFDNYAAHEVALFDDFEGIKSGISFRKLLQLCDRYPLVVPVKNSFVNWRPKVIIFTTNVKPEQWYPEDNYAPLRRRIDELIDFDMFPYNGP	unclassified	und(circolike)|und	0.26
KC441518	Farfantepenaeus duorarum circovirus isolate FL2009	MSGSRRWCFTVFNYNHATVDDFIRAERHDCVRYVVWQCEKCPTSGRSHIQGYVELHRPIRLRQLKQILDDTGAHCEAAKGPRDACREYCQKEESRCCGWWESGEWIGGQGSRSDLSAVHAAIQDGASLREISNAHFDAFVKYSRGIKEYILLNADRRMWPMEVWVLYGDTETGKTRAVYEMAPDVYSLAPSHSNGVGWWQMYEGHADVLLDDFYGWLRYSFLLQLLDRYPLRVESKGGVVQFVGRRIFITSNAHPNQWYPNVKDTAAMFRRFTRIYHCDKSRFWREK	unclassified	und|und(circolike)	0.31
KC248418	Diporeia sp. associated circular virus isolate OL743	MATSVPLTSVPVKDKVLAKMRNVCFTLNNYTAVDVSRLEMLEKGVSYLIFAKEVGDSGTPHLQGYIEFENPRSPGKGWKNFKELMGECHFERRKGTAKQASDYCEFADYPTCQVKNEYVFKFGEISRQGERTDWHQAVSQILDEKREIVDVVAEQPQILPAIRALENLKKMSIQPIEREVHITWLYGSPGSGKTRWVWTNYPEVYSKPSGQWWDGYNGEETLLLDDFDGEIPFAELLKVLDRYKYRVPVKGGFVGARWTRVFITTNNPPADYYQTVSNRKALDRRIHEIKIFPLGITLNGSSSSSFPAQGEEDCA	unclassified	und(circolike)|CRESS1	0.24
KY884302	Garrulus glandarius associated circular virus 1	MATSVPTVPGKLGKSRSCCWTLNNYHDDDIIRLRHYGKNSCRYMVFGYEVAPGTGTPHLQGYVSWENPRSLDAFKLEISQRLHLEKTRGTPKQASDYCKEDGKFEEFGELPRQGERTDWCVAISQIQSGIPVEEVIENQPQLLPCIRALDTFKARQIKPLHREVTVYVLWGDAGTGKSRWAYDNYPELYSKPPGKWWDGYLGQKTILLDDFYGYIPYTELLNVLDRYPYHAEVKNGYVWAQWDTVIITSNKPPNLWYKGIGLTPALQRRLNKISFYGIDGKIEDASCPPEAQSRSA	unclassified	und(circolike)|CRESS1	0.22
KJ547623	Sewage-associated circular DNA virus-12 isolat SaCV-12_NZ-BS3888-2012	MALKARYWCFTLNNWCDGELLEIAKFSGRYLTYGFEIGESGTPHLQGYCEYENPVTMGRVKKDISDRCHVEVRKGTQLQAVSYCHKDGNWLEYGEKAAGQGHRSDLDDVARDVLDKKSLMEIANDHPTSWIRYSRGIQSLANSQPPPRWRDVLVLVYWGVTGTGKTRRAMLEPSAYKLNQNTNGTLWFDGYDGQSTLVIDDFYGWIKYGELLTLLDGYPYRCQVKGGMAWARWDTVIITSNKCPDDWYPLVPDTAALKRRISAIRYFEPILDQK	unclassified	und(circolike)|CRESS1	0.27
KM874347	Avon-Heathcote Estuary associated circular virus 19 isolat AHEaCV-19-NZ-4942GA-2012	MSRKRNWCFTLFPDQDGYYTDNIADMVSGDYDFEEQKIRFIIFQEEICPESSRRHLQGYVEYTVSRRLAAVKLSLGSESVHLEGRRGTASEAAEYCEKEDSFAPDGIRFQWGELGGEQGARSDLATVASAVISGKRVEEVALEFPTTFIRYNRGIEKLTNVVRRKEQMRNLRMLKVVVLWGDAGTGKTRTAFELSPDHYILSQQDGQLWWDGYEGQKHLIIDDFYGWIKWGLFLRILDIYPLQLPVKGGFTIASWDVVFITSNCMPRNWYERGMPAELARRLTHIVEFESYETDFDKIKEILV	unclassified	-	0.29
JX904333	Uncultured marine virus clone GOM02962	LFVIVFKYPVQKFLYRVPFATRVFLVEWFDPRNLCTTLKFGTLPLIFDGSKLCHFMPTRSPRHRAFCFTCPNYNEANRELLDSLCGDGIARYVCYQGELAPSTSTPHLQGYLVLANPRTFDGTRELLGPRFHLEIARGSAEQNIEYCSKSESRDPDCGFEFVEHGDRRSVIGTGSGSGTRTDLAVIAKRLRDGETEAEIAEDHPASYIMYTRGIRSLAQQYIPRRSHKSIVYWYWGPTGTGKTRAASEESPDAYWKSAAHQWWDGYDGLADVIIDDYRASFCQFNELLRMLDRYPYQVQVKGSTVQFNAKRIFITSPKDPRETWSSRTEEDVAQLERRIEHVKFFGEISQAASPHVSSFNPSS	unclassified	und(circolike)|CRESS3(circolike)	0.33
KF133808	Circoviridae 2 LDMD-2013	LKIPDRSRHRAYCITLNNYFEHDRQNLETLVERGIAKYVCFQPEKAPGTGTRHIQGYVVFQNARTFSGAKAIIGEGAHIEVARGSSQANIEYCSKDESRDTEAGFGFIERGNREDVLGTGSGGGTRTDLAVVAASLRTGATLSQIAEDHPASYIMYTRGIHSYAQLSLPKRSHKTIVHWYWGPTGTGKTRLACEESPDAYWKSSAHQWYDGYDGLADIIIDDYRCSFSTFNELLRLLDRYPYQAQVKGGTIHVNAKRIFITAPKDPRSMWQSRTEEDIAQLERRIEVVRYFGVDENIPEPVLNEAPAVIHGFDPGVALL	unclassified	und(circolike)|CRESS3(circolike)	0.24
JX904541	Uncultured marine virus clone SI03513	MPSSRRGRLWCFTLNNYSDDERGLLGLSFGGADILYACYQPERGENGTPHLQGFLFTADRLTVAGLKRILHVNRVHLEIMRGTSAEAIAYCQKDESRDRDAGFAFCEFGDRATVPGRSGQGTRSDLDEFSQRVLAGEPLAEVAEAMPSTYVQNYRGFESLRRLVVHKPRVVDPDGVLVPPRVLWFWGPTGGGKTRSACREAAGKSIFWKMADNHWFDTYDQQDVMIMDDFRTSWFKFGFLLRLLDAYPLVLEIKGTSVQFNTNTIIITAPKAPEEMYSNLAENEEGQYNQLLRRITEVRYIGPPLEAPPAIAEIFNPPN	unclassified	und(circolike)|und(circolike)	0.3
KC248417	Diporeia sp. associated circular virus isolate OL711	MARSRNWVFTLNNYVDADRVVIGERLANDATYVCYQPEIGASGTPHLQGLVVFANPRTLGGVKRLISDRVHLEPMRGTFAEAHAYCSKDDTRDAGAGFAFTEHGTKPDGPGQGARTDLESIGKRLREGASLASIAETHPSDFIRYHHGIRALQTVLSAQPRVRGPDGLFPVPRVLWFYGSTGSGKTQTIHEEIGDTPYYTKPPGNRWFDGYIGQKIVVFDDYRGDWWTFGYFLRILDRYPMDVEIKGSFVPFAATTIYISCPRSPQDLYAGLESRTDGALAQLTRRITEIRLFGQAPAPAGPMVDGFHP	unclassified	und(circolike)|und(circolike)	0.28
KM874309	Avon-Heathcote Estuary associated circular virus 7 isolat AHEaCV-7-NZ-3107C3-2012	MKKFKEKITSLLMRFRNVVGTLFTNERPHEQFITSPLIKYFIGQYEICPSSKRRHLQFYCEFVGQQRLGAVRQLFGPTVHVEPRRGTVDEARTYCSKEDTREPGIDSGPFENGTPSKSGKRSDLADIKEELDAGSSLKSISQQHFGQFLRYRKSFEAYIVLNQDPRTWEMENSILWGEPGTGKTKLAYDLKERDGVEGYPLMRNQNGNVWFDGYHGQEILLIDDYYGWIPLAFLLQLLDRYPMNVQTKGGSVPFTSKKIIITSNKSPECWYNWSKFGKNMFGAFERRINQVFHYVKDKDPAIYPIKFPETVSAVEFFQ	unclassified	-	0.31
KF133822	Circoviridae 15 LDMD-2013	MSRLRNVCFTLYNADPEDVASKLSELVDNQDSWLRYAIFQEEKCPESDRLHLQGYLECTKPVRFGTLKDFLGSTVHLERRRGNRQQARDYCRKEETRVRGPWECGDWNANKQGQRTDLDAIREMVVAGATEESIADEYFGTWARNHRAIARYKFLKSKPRDFKPRVIIRWGVAGSGKTRGVYDTHETAVVYNVPRPNGGTVWFDGYDPSVHEVVLLDDFYGWLPWSMLLQMLDRYPMSVPKKGSTCNFRAKFIYITSNADPETWYDYSKPGIEFEALKRRVDETHHFTTL	unclassified	-	0.29
JX904312	Uncultured marine virus clone GOM02856	MTSRARRWVFTIFQNIAATVQLLQALPVGEEVRYIIFQEEECPETQRRHIQGYAEFTRPYRRGGVQQLFGGGQFRCNPARGTADQNREYCSKADTRVDGPWEAGTPARTTQGQRVDLEAVRTAVAEGSSLSVLYEEHFGAMARYSRAILAYRQLIESGRTRDVPPVVRVYYGTTGTGKTRRAYDEARAFGTPYWVPVPERHGLQAWFDSYDGTSPLIIDEFSGEFGLNFTKRILDRYPCQLPVKGGFVSMQTKQIWITSQKDPDEWFPEASPEDRAAIRRRCQTIIRFGTLGGS	unclassified	und|und	0.29
JX904407	Uncultured marine virus clone SI00078	MLEKGTKKKALVLEKGTKKKELTQKWGLVLPPTFVPKAKKKIFRNSIMTKQKKQQKARSWCFTYYPTNEEQDLLWFKNLTTTSQIRYFVMGRELCPTTGKLHFQGYISYNNAKTFQQTKKWFQLDKIHIAPAKGNDFQNQVYCSKEHLLIEIGEPIKQGKRSDIVRAIDIITQTNSVSAVLEEVNNYQAVRHCELWLKYKEPCRPVQSINVIWIHGSSGSGKTRKVYDDNSGNEIFTPTSHKWWEGYDGHQVVLIDDIRRDFCKFHELLKLLDIYPFRVETKGGSRQVQFKTIYITAPYSPIEMWEGRCDEDLLQLTRRITQTIDIDDN	CRESS3	-	0.27
KT149403	Circovirus-like genome DCCV-10	MTTRIRAWCFTLNNPTDRDKRALIALANTTRYVIAQLEHAPTTGTPHYQGYMVFHDGKSFSALHKAMPRAHFEPARGTAQQNYDYCTKAADEGQPSNELVLEHGTLPQQGERVDISQVRELLRSGVTYRELVDMDVNYQVLRIAQEWLRVHEPARDFKPEVRWFYGEPGAGKTRAALEWLESHGEVFTVETPAKYWDGYDGHNCVLFDDLRADQCGFVRMLRLLDRYAMRVEVKGGSKQLRARYIAITAPHRPEEIYRTSSENIVQLTRRISSVTHVTRDDPDNGRPTCRYGNCEPDECLCRSNDGSDELYDSE	unclassified	-	0.4
KJ641729	Bat circovirus isolate BtPa-CV-3/NX2013	MYLRNFVFTLNNYTEDEYNFIKNFEQAQYIIIGKETGAQGTPHLQGYMELKKQVRFNTVKSVFPRMHIEPRRGTQKQAVDYCKKEKNFIEVGKAKMGGIRNDVASVIEFKNSSFKSFFESSPGADIQAFNLLGKIKTYMEEKRDYKTFVIWCYGPSGSGKSRWAYEISRKYNPYFKDDTKWWDGYDNNSVTILDDFRASNMKFNTLLKLLDRYPYLIEIKGGYRQFVSSIIIITCIQKHEDTYKILENDEPLNQLTRRINKIMSFPLQNHVTMEEIISESEIRDDPDEEHESEGQFGAVGNTIRQRLSVVT	CRESS3	-	0.29
JN857329	Circoviridae batCV-SC703	MGQQVRCCVFTLNNYTEDDMIQLNEWDYKYLIYGKEIGKTNKTPHLQGYIEFNNRKYFSTLKAFNPNIHWEKRLGSQLQAINYCKKEGNYVEYGDKKVQGKRNDISYYKELALKEGMKKVVEEGNFQEIRTCELYLKYKEEERNFKPEVIWIHGESGSGKSLKASEEKDAYWKDKSQWWDGYDKHNTIIMDDFRSSDMKFDYLLRLLDRYPMRVQVKGSSRQMLSKKIIITSIYSPEEIYSHYAQYNNNREPINQLLRRIDKTMKLEQVRSRGNTIPDSNDGYEHIRTLLQSSFQDPFDSEIVDLQKEQ	CRESS3	-	0.34
KJ641718	Bat circovirus isolate BtMf-CV-1/GD2012	MDRSRCICFTLNNWTDEEYQQLVNWDQYEYLIIGKEIGKTNNTPHLQGYIEFKKRISLSKLKKFNPKIHWEPRKGTQSQAITYCKKENDFKEYGIPKKQGERTDLVKARTIVQEHNMRTLLQLEDPVNIQQIRMCEKYLTYCEEQRSWKPKVIWIWGPSGSGKSRLAHAMTENEDRYLKDESQWWDGYDKHETIIIDDFRGKQMNFTYLLKLLDRYAMKLQVKGGYRECLAKKIIITSIFSPDRSYAFLNEEEPMKQLYRRIDTFINMEEWDEQELFEKWTEDRSRG	CRESS3	-	0.45
KJ641722	Bat circovirus isolate BtMf-CV/HeN2013	MQSVNWCFTLNNYTDDDVKALKLVKCRYICLGFEIGEEKKTPHIQGFIQFEKKVRLTAWKKINKKIHAEIMKGNVDQAIAYCKKGGVYEEKGDVIKERQRTDLREAKKKCAAEGMRAITGENDEYNNQVIRSCEIMLKYHEKVRDFKPEVVWVYGNSGSGKTKYVKEKCAAEDTYWKDSTKWWDGYDRHETVVMDDFRASNMKMNELLKLIDRYPHRVECKGSFRQMLSKKMYITSIMHPKEVYNLPEEPVQQLLRRIDKIVKVSKL	CRESS3	-	0.39
HM228875	Circoviridae TM-6c	MQSVNWCFTLNNYTNEDVNKLKQVKCRYICLGFEVGDKKQTPHIQGFIQFEKKVRLSVWKKINKKIHAEIMKGTIEQAINYCKKSGTFEERGEIIKMGERRDLKEAKKKCAEVGLRAITDCESTYNLQVIRNCQIMLEYHEKERDFKPEVIWIYGESGAGKTKYISEKCAEVDTYWKDATKWWNGYDRHEITVMDDFRASNMKMNELLKLIDRYPHRVEIKGGFRQMLSKKIYISSIMHPKDVYNLPEEPVKQLLRRIDTIIKI	CRESS3	-	0.33
KM972726	Mosquito circovirus strain B51	MSLIQFVCWTLNNYSEDEYQSLIEFSEWRYIVIGREVGETGTPHLQGYGELKKRKKFAALKNLFPRVHWEQRRASRDAAANYCKKEGRFEERGSLPKNASEKSSKEAITRVKSGQTMRAILDDPPNLSGIRMCQIWLSYNEPKRNFKSEVFWYYGASGTGKTKLASEQAGPDAYWHDGTKWFDGYDAHEHVLLDDYRGGNMKFNFLLKFLDRYPLRLEVKGGYRQLLAKKIWVTSIKHPKEIYSFSEMDEPTEQLLRRITTIKKMCACSQCERIYGNRFEVSRFAVCGNTSTNSDTAANET	CRESS3	-	0.3
KP153422	Lake Sarah-associated circular virus-16	MAIYTDADEHHFLNTRTKAVHFVSFETSNETVERLASLKTDYMIIGDEHCPTTGRHHLQCYLYTKNKITLSTIHKACLKKCKLFIANGTAEQNQTYCSKEKILYESGTLPSGQGKRTDLDTTRANLLAGGTLRDVVLEATSYQSVKMAEQILKYHEKKRDWKPIVKWFWGATGTGKSLTAYDELDKDDTYTAMSTGKWWDGYDAHSCVIIDDMRRDFCKFHELLRYLDRYPTIVETKGGTRQFLAKQIIITSCYAPEDMYETREDIQQLLRRIDEVREFTAESLGKINSIN	CRESS3	-	0.34
KM874317	Avon-Heathcote Estuary associated circular virus 9	MSDKHRSYSFTLNNYTDDEVFALTSMCEPINRGVKYLIFGKEIAPTTGTPHLQGCIIFTSPRSFKALKKVVPFNRANYKPTISEPGSARYCKKDGDVYEYGTPPKQGKRSDIENVRDILTSGGNIRDVVSTATSIQSVRMAEIHLKYFEKKRNWKPTVRWYYGATGTGKSKTAYEECDEHDPYVAMSTGKWFEGYDAHTHVIIDDMRKDFMKFHELLRMLDRYAFMVECKGGSRQFLATDIYITSCYAPDEMFESREDVNQLIRRLDEIRKFE	CRESS3	-	0.38
KM874304	Avon-Heathcote Estuary associated circular virus 6	MSRSRNWCFTLHNYTDDDIEIFKNIKCRYIIYGKEICPTTKRQHLQGYIQFDNQRTITAVKKFLGLPKIHLEIANGSSDDNKAYCSKDGDMYERGDCKQQGRRTDITDIKDMISNGATMRDIIPHATSVQSVRMAEIHLKYSEQKRTWKPKVQWFYGPTGTGKTRTAYEILEDPYTTLDTGQWWEGYDAHENVTIDDMRGDFMKYHVLLKLLDRYAYIVECKGGSRQFLARHIIITSAFHPKDVFHTREDIAQLMRRIDCVKEFK	CRESS3	-	0.36
KP153408	Lake Sarah-associated circular virus-10	MTDTRSRDWCFTLNNYTEEEYDVIHSLSLSQYKYIVVGKEVGESGTNHLQGYIYFVNAKSMSAVKKMISKRCHLESAKGSPLQAATYCKKDNNDYYENGELPVIQGKRTDLDEIRDILKQTNKMSDVVMVAKSYQSVKMAEQILKYHEKPRMEKPYVEWYYGPTGTGKSKKAYEVLSDECYTCLSTGKWFDGYDAHKNVLIDDMRKDFMKFHELLRLLDRYAMRVECKGGTRQFVASHIIITSCYHPKDMFETREDIQQLLRRIDKIENFE	CRESS3	-	0.33
JX904075	Uncultured marine virus clone SOG00160	MSDTDVCDVLTRSRSWCMTINNPTNADKASLCGLEVEYMIVGREHFNDPDKTPHFQCYIRWKNAKTFSRMKKLFPRAHLKVARGTDKDNKKYCSKEEVLIEKGEASEQGSRNDLKGIIDMVQQNPSMDYIIDNVSSLQAIRTAEKLLVYREPRRSWKTEIYWFHGSTGTGKSRRAYELFPDAYTAMDTGQWWEGYDGDEVVIIDDMRRDFLKFHQLLKLFDRYPYRVEVKGGSRQFLAKTIVVTSCYSPEDMFDTRDQEDIQQLLRRITEIKSFDTI	CRESS3	-	0.35
JX904139	Uncultured marine virus clone SOG03994	MNKDINPKSRSRAWCLTINNYTEEELECIVSYSSEYTIVGNETCPTSGTKHLQCYIRMTNTKTFTKMKKDFPRAHIEMAGGNDLQNKAYCSKESVLYESGTPSKQGKRSDLEKISNMILESPRMNDMIDKLSNLQAIRTAEKLLMYKEPQRNWKPTVMWFCGRSGTGKSKMAAELLPDAYWAMDTGKWWEGYDGHEHVIIDDMRADFLPYNHLLKLLDRYPYRLEVKGGSRQFLAKTIIITSPYSPDQMFGIMHEDNKQLLRRIDKIKYFDNI	CRESS3	-	0.34
JX904076	Uncultured marine virus clone SOG00164	MDDCNITKLRKRGWFLTINNPTEDCKLKSLRYVHKSEYGVIGEETCPTTGTPHYHVYFRLKDAVTFSKIKKDIPRANIEPAKGNDQQCKDYCSKQNLLVEHGTISAGQGKRTDMSKVKDLISEDPRMSSIIEQVGSLQSIRTAEKLLIYKEPKRNWKTEVYWFCGATGTGKSKLAFELHPDAYVAMDTGEWWEGYDAHEEVIIDDMRRDFLKFHQLLKLFDRYPYRVQFKGGSRQFLARTIIVTSCYSPEEMFETREDIQQLLRRLTKIKYF	CRESS3	-	0.34
JX904581	Uncultured marine virus clone SI03931	MSRKRDYCFTDFVLDETFLQGLPYEYLCYGRETCPTTGKKHLQGYIYFKNAKTFSAVRKLLQPRSVRACKGSAEQNATYCSKENDFLEFGVRPKQGERNDIHDIMENIQTGNYTMRDIVSSATSFQSIRIAEIQMKYFEPIRQWKTHVSWFYGKSGTGKSKLAYEMCEDPYMCMETNKWWEGYDAHEDVIIDDYRRDFCKFKVLLHLLDQYPMRVEAKGGSRQFRAKRIIITTPKSPQETWEGRTDEDLYQLTRRIDIIKEFV	CRESS3	-	0.3
KM598406	Odonata-associated circular virus-20 isolat OdasCV-20-US-718DFS-12	MAQEHISRSRAWCFTLNNFTPEELAEIENKSDYGIIGDEIGEKGTRHLQGYLYWKNPRKFTFIKKIIPRAHIEPAKGNPQQNITYCSKDKIIATWGEPPKQGKRTDLETMREILKEPEPMRKITESLNYQATRSAEKWLCYNERKRDWKPEVTWYTGPSGTGKTRAAKEELPEAYWKSGTNKWWDGYDGHKEVIIDDFRGSSIAFTDLLRLLDRYPMQVECKGGSRQFLAEKISITSIYHPEKVYKNLEEEPIEQLLRRIDKIVNLTDTDV	CRESS3	-	0.38
KT149409	Circovirus-like genome DHCV-3	MNVRSRDWCFTVNNYTYDDYKVCQELSVMCQYVVIGKEVAETGTKHLQCYVYFENAKSFSKMKKLLPNQAHIEKAGGTPQDASNYCKKGEQPKNEWKALKHMGPQWGLNADFWEHGSLPQPSGTRNDLKEIREMLAQGKGMRDVIEVATSYQSMKSAELILKYKERKRNWKPKVIWLWGRSGIGKTRAVYEECPNIYRKSNNSGKWWDGYDAHENVLIDDVKDTSEEFYSMLLEILDRYDVRVQTKGATREFLAKTIYLTSLEDPRIMYRRFPEEGYELYRRIDEIRHVT	CRESS3	-	0.44
JX185418	Dragonfly cyclicusvirus isolate FL1-NZ37-2010	MGSPAIGWCFTLNNYTEIDEQVLQALDVKYLVYGHEVGEGGTPHLQGYLELHKKKRFKQVKEMLGERYHIEMRRGTAAEVDAYCRKQDENNVFTKGTMGGQGLRSDLDRVRLLAAESGMRAVAATANYQQIKTAEIYLTYNEEPRSWKPTVYWIYGASGTGKTRKAYEICGTEDTYVKVGTHKWWDGYDGHENVIIDDFRPMGIPFVDLLGILDRYEFRVEVKGKMRQMLAKTIVITTIYPPEVLYVNLKDEPLQQLLRRIDHFINFNLNSILDNIEHEFEDAEEDINS	CRESS3	-	0.3
KM874300	Avon-Heathcote Estuary associated circular virus 4 isolat AHEaCV-4-NZ-3049C3-2012	MTHIYKMADVRKRAYCMTIHNWSEETVNQLKNLKYQYLIIGNETCPTTDRKHLQVYAYFKNALSFKSIKKQFPTAHIEASKGTPNHNKTYCSKEDVLFEEGTFPEQGKRSDIEVCREIVQSGAGMREVVNHCQSVQGMRIAESYLKYHEKPRKWKPTVQWFYGESRSGKTREAYEILGDDCYTCLNTGKWFEGYDAHENVLIDDIRKSFMPYDEFIKLIDRYAFRRRMLRKFPPVFSKKDNYHLLLSPRRCLEKQGRY	CRESS3	-	0.53
KM598404	Odonata-associated circular virus-19 isolat OdasCV-19-US-1594LM1-12	MSFQYHNFVFTSFKTEDFERVLGLDVQYIIVGKETCPETKREHLQGYCELDKKKTMAGIKKLFSDDSLHIEARKGTQKEAIIYCQKEGNWKEAGVQRKQGSRGDLDGARVMAVESGMRAVSRSMNMQQIRVAEKFLSYNEEVRDWKPEVLWFWGDSGSGKSREARFISHGLDTYVKNTGGKWWDGYDGHEVVIIDDFRDSWWALTYFLACTDRYEFQVEVKGGFRQLRAKMIIITSLFHPKYMYREAQAKGDTAYQILRRIDSVVHFGSQKPEVGGNTIAPTVSNFIDETIGLL	CRESS3	-	0.38
KF738883	Dragonfly larvae associated circular virus-9 isolat DflaCV-9_NZ-PG10-LD	MGHQVKRWCFTLNNYTEEEYKEIVEKIEWTYIIIGREVGEEGTPHLQGYIELKKKSSLNQIKKVNQKIHWEQLRGKPFQAADYCKKENNFQEWGHISMSGGGTTEKIGAIIEKAKSGGMREVLKDPPKLATVRLIEKYLSYCEEERKEKPYVHWNLGNITTYTGRMTPNGGDGYDKNETIVIDDFRASIMRFTYLLRILDRYPMRVEVKGGYRQLNSKNIVITSIIHPESCYHMENEPIRQLMRRIDKITETNNKNILNDVMLQATSEESVGNTNLHFLICDEELGE	CRESS3	-	0.36
KM598403	Odonata-associated circular virus-18 isolat OdasCV-18-US-1736LM2-12	MSKTNRFCFTRNNYSELHLEILKSNLTSTFKYWCFGVEVGEEGTPHLQGYFEFPNTQKLRISAAQNKLINIGLEGCHIEPAKGTAEQNITYCSKDGSFFEGGERPRGQGKRTDLDSVCELIKSGATMNEVANQFPSQVVKFHTGLQHLMNLTTMPRRFKTEVWWLWGPTGSGKSRYAWDQYPSSYMKECSHKWWDGYTGQDVVIMDDFRPSKELPFSFILNLFDRYPLSVQVKGGMAQFVSKIIYVTTPLSPKETCNHLEWLGPEQKEQFLRRIDHIVEFPQMMTNFLAR	unclassified	und(circolike)|und(circolike)	0.16
JX904518	Uncultured marine virus clone SI01664	MATKSRKYIFTCNNYDDSQISEIQKFCESLKKDGSTKVIYCIYGKEVAPTTGTPHLQGFIMLRDQMTMSALNKKCFLNRASFKVARGTVSQNVKYCGKEDNVTEYGDRAAAEVAQGARSDLETICTQIKEGATLKRIAEEHPSQFVRYHRGFAALRTQLSVKRDWKTYVLWAHGPTGVGKSGFAHAYATHLHEARGWTTYVKNPDTGKWWDGYETQEIIIIDDWRPSMCTFASMLRMLDRYEHRVETKGGMAQFAPKIIIITTPKDAAASWSNITEERMDQLLRRINESWTSTEAIENCSTFCSKVSQVIMNWDTNLRAFLSGD	unclassified	Circoviridae(circolike)|und(circolike)	0.27
KF738880	Dragonfly larvae associated circular virus-6 isolat DflaCV-6_NZ-PG9-LD	MACRSRGWAFTLFHYTEEDINKIKKLEVQYQCVGKEICPKSKEPHLQGYLYYANPVRFETVKTSIRKEVHLESARYSAKRNARYCKKEGDWWEQGEPPMMGARSDLAEVALMVRNGASLEQVAEENPEVYVRYSRGLQALQTKVMKHRTERPNVTWIWGSTGVGKTRYAVELCDSFYMKDGTKWWDGYEQQKWIILDDFHWDGKVESFREFLRMIDRYKYQGETKGGHVKINSPQIVITCEHAPDKFWYDTKLDQVIRRLNKVIHLSGTEVVGTEVPGNTIPEPQNSVAAGAAPPPPQI	unclassified	und(circolike)|und(circolike)	0.2
KP153512	Lake Sarah-associated circular virus-50	MVKSRGWCYTANNYTKEEYESLEKYDCGYHVMGKEVGEQGTPHIQGYIEFTNAKRFDTLHADFPKIHWEPRKGTQQQAIDYCMKGGDFVEIGTKKDQGKRTDIEAVIKDINDKVFSPNNHAVAYIKYAKGIDCYANYKLLPRTVKPTVEWRYGLTGSGKTREPYERHINSVYIKDGTMWWNNYTQQEAVIIDDFDGHWPYRDFLRLLDRYPYQGQYKGGYVNISSAYIYITCEFSPETFWRGNELAQVIRRIDTITLCRINEPVPVMVIDDLVD	unclassified	und(circolike)|und(circolike)	0.31
KM874337	Avon-Heathcote Estuary associated circular virus 15 isolat AHEaCV-15-NZ-3424C2-2012	MHNTTALQSSYPNRNSRSPTANRDGAIRNQSPRTQQRLSRFVFTLNNWTEAEYTDIIASDVKWLVVGKEIGDEGTPHLQGAVVIGKQIAFSTVKKWPGFSRAHIENMRGKPFDSLKYCTKQDTDAFCKGEMPQEGKRNDLHDAINALKQGGTLTSIVKSDDVGLAAAVARYSKGLAMVSSMLKPRRSEPPLVIWLSGETGVGKTRSAVALADRIAPDNYWISAGSLRWFDGYDGHAIAIFDDLRTKHAEFSFLLRLLDRYPLRVEFKGGFIDWTPSVIVVTAPKSPTHMWSLRNDEDKQQLERRIHLAYDAEEGDDWELLLAKSEAIVAERWPTGSYPWKHYDEVNVGSDETTIPEERSCSLSTMGQEPDTSPSIIEIESDLSSEELVISSSEEEHSYE…	unclassified	und(circolike)|und(circolike)	0.26
KP153492	Lake Sarah-associated circular virus-35	MYGVRKEVFRSAMTTAPARRPNSTRTRTRVGQRLRRFCFTINNYTEALYDELLAFAVTTSWFVVGKEVGENGTPHLQGACILNNQLSFNSLKKMDCFARAHIETMKGSPQDNLVYCTKEDTNAYVYGTLPEPGKRNDLHEAVEKVKEGATLRDLALGDGGPAVVKFHKGLTVLRSLCSTPRADPPTVVWIYGPTGVHKTRCALEFGKILGAASGSSEANSVWISGGGFRWFDGYDGQPVAIFDDFRAKQLTGAGGFTFLLRLLDRYPISVEFKGGFVNWTPRIIFITTPHDVATTFAKRNQHIPEDIAQLDRRINKVIYFPEAPSDSDKSELLDALTLCAGLRLAGPQVPAAIPGWNEDVELSGTSSDGE	unclassified	und(circolike)|und(circolike)	0.25
KT149397	Circovirus-like genome DCCV-4	MRTNQVQQRDGARRNSHGLRFSRFVFTINGTTQQLAHDMACLKTLTPKWLIAANETCPTTQRKHIQGACILGKQVAFTTLKNMPGFTRAHIEVMKGTPAQSREYCTKEDKEPYEYGTMPQQGKRNDLQDAIAILKEGTSIRDLILTADLPTVATYVRYPKGLTSVSQAFRERQGHIQPFVLWLHGSTGVGKTRCALELAEYLGCGSDVWVSNASLQWFDGYDGQRVAVLDDYRTNHCKFSTILRLLDRYRFSVPFKGGFVLWQPLFIIITTPKSARAMWNLRTEEDIAQLERRITLSVDVDGHEDGYDVFRDTIFGQVRERVSESPHFSHLAGLLPADAMDLSADCDRSADSSESGAIPDPVELRERGGRGSGLRDGVCGDSNSDATASASISSSLSEE…	unclassified	und(circolike)|und(circolike)	0.22
KJ547622	Sewage-associated circular DNA virus-11	MATTTSSEQSNKSNRTKRLSRFVFTLNNYTAEEEQVIQLLGTTLKMKWLIYGREVGEKGTPHLQGAAVIGRQLAWKTIKNSFPPRTHLEEMKGTPRESFIYCTKEDKEYYQFGEEPKPGKRNDLLDAVASLRKTSSFRDFVKDDQNASVYVKYTRGLTAFRSLLREPRSPSRPPTVYWLHGPTGAGKTKHAWEFLEGYFGTDQETWISNGSLRWFDGYDGHRGVILDDIRADSVPYNELLRLLDRYPYRVEYKGGTTEWIPEIIIITAPMGPYQFFRVGDDIEQLLRRVNGGIFEFTIDGPNPRLQTVAPTVPNTPAHSEVESQDDVQELQESSEGLSLLESIGRGSGIEQDQSNSQEEETQLRKKRKFID	unclassified	und(circolike)|und(circolike)	0.3
KT732825	Pacific flying fox faeces associated circular DNA virus-8 isolat Tbat_H_103163	MPKAKRESPAKDYCFTVNNYDDDGVRLLSGLVQGGIAGYICFGYECGESGTKHLQGFIQFTRKVRFSTVQASLPKGTHIEKRRGTPEEASEYCKKEGNYHEEGKLSKSGNRSDLEAVAKEVARGASDFQIAETFPAVFVRYYRGLRELRCVLNGNVQRSWKTRCHVYYGYPGSGKSLQAEPIGYGWIVFDELLKICDRYPYRVPIKGGYRNFVARDIFITSNSGPDSWYPNVFEREPIKREAMSRRFEYVIEFKKMCDHFVCEIDKFDYENNVYELAI	Circoviridae	-	0.56
KP153402	Lake Sarah-associated circular virus-5	MSTRQRHRSVCFTLNNYTAQEKQHIKDGADAGSFKYIVFQEERGAVGTPHLQGYAQRAQPTEFKTWKRFLGDRCHLEGSKGTPARNREYCTKDADRIPGTLYFEKGEVPVQGERNDLTAIFEAAKDSTVSVRDLVDTNGAAFIRYYKGVLAVRSIFSDKRQRKTKVFWFYGPTGLGKSHECNRLAPNAFWKQNSPWWCGYDANEHDDIVIDDYRADFCKFAQLLRLFDFTKLTVETKGGNVNFRAKRIFISTPRSPLETWIGRSEEDIQQLLRRIEVLVEFTPSPFTDNGRVLPNKVFHKGSPDDLVVDDLGDGDQQPRSPVETPPEEAVEDASDRRTRPRVEEADEPREQFAQDEYGFLNEFDELNDDDFTF	unclassified	und(circolike)|CRESS3(circolike)	0.23
JQ837277	Acartia tonsa copepod circovirus isolate 154_D11	MPSNATTNRARGWCFTLNNPPPEMISERRVVVPGHVSGLDAAIPTEPNLPEHRHCDYRVGQLERGDNGTLHIQGYYHHRVMKSFNQMKKLIPNAHWEIAKGSPKQNRDYCTKEDTRVPDTRPFEEGECPHQGTRFDLRQCADVLANGGSLLDLPGEMVIRYHRGFSAYRSLFHKRRQEAPTVLWIYGPTGSGKSRFASTLRDECYWKPPGKWFDGYDQEPLVILDDYRSEWAEWGVFGQLLRLLDRYPLMVEYKGGSVQFCSELIVITCDRPPSELWFSQGDIGQLTRRISHVIHAVGMWLPVEPAVHESIKRRDNIE	unclassified	und|und(circolike)	0.32
KM598408	Odonata-associated circular virus-4	MPSTITYIFTINNPTEDDTDKLQLAPGITSIAYQYERGETGTRHIQGAIRFARRTTFNQVKRILPRAHIEAARGTWQQCMDYCTKLETREEGPFLLGKCANEDMAPYQRLEEDIKNGATRDDIENRHFKLYLRHHTAINHILTFHTKPRSNKPTVTVLWGPTGTGKTRAVVKRASNRGDSLYIKERGKWWDGYAGQAICLLDEFYGWLPFGCLLRLLDRYPNRVEYKGGSTQFTSDEIWITSNKEPKDWYKEEYMDALFRRLDRIVFCDTNVWLLRKIKEQNRPKPYTLNTRQNRLAVRNLT	unclassified	und|und(circolike)	0.18
KM598394	Odonata-associated circular virus-11 isolat OdasCV-11-US-341DFS-12	MGHEIRAKSRGWCFTLNNYSNLEISELKLRFEGAVWYIIGEEVGLSGTPHLQGAIYYKNAVVMPKFNPRIHWEAMRGNCQQSREYCSKEKVLVEYGECPKKGKRSDIKSMVEMLQAGATDKDIYMAHGDKALRINGCLARARASLTEVKRNWEMDIRIYYGAPRTGKTRAVYEEFGIDNVYSKMAGKWWDGYRGEPCVLIDDFDPQNCFDIQYDFYLKLLDRYPLRIEFKGGSGEFYSKTIILTSNFDPAIWFTEKANRDAFFERIKEIRYFGGTEVSGGNTSLLTPENKPTYEGIGK	unclassified	und(circolike)|und(circolike)	0.18
KM821764	Sewage-associated circular DNA virus-29 isolat SaCV-29_NZ-BS4325-2012	MSTTQTPSILKGGLARRKAGTNPKANRWCYTLNNPEFPIPWNETTQLYHIYGKEIAPGTGTPHHQGFICFKNQKYLTQVKELNDKAHWEIAKGTNQQASDYCKKEGDFIEKGTLPEDPQRLGAKANEVKWRLINDLAKAGNLAEIDIKYPKVWNTSYRNLKSIKVDHMKPLADLDEPCGVWLYGASGAGKTMKARTDYPNAYLKLPNKWWDGYQGEANVIIDDVDPNHAYMGYHLKIWADRYSHLAEVKGSTIVVRPRKLVITSQYRIKDIWASEPATMSALLRRFKEVYVDRKLWDNPIENAFKKQNAIAQVKINEAVAQIDKESTPEIPVEVISDDECTMLDALVAEAEEEAQKNKLKDKPTIGAKTEALKRCKAMSVEDYEKMKPIKLRPTNPHFP…	CRESS2	-	0.46
KU043397	Unidentified circular ssDNA virus isolate 2035	MPEFKVGKRFCFTFNNYTEEEEKKLKEELEKNAKYAVFGHEEGEEGTKHLQGFVVWKTARRPGGLKKINAKIHWENTHGTSKQASDYCKKDGKDIFEVGEIPKDFQSNEHRKKGAAANKVLWDNIYKLAKEGKFDEIPRNIYIRHMNNLHKIHDMTMKDRSMDEFTNKDLKDHFLWLWGGTGTGKSTNARRIAKKIEKDKEPYLKGLNKWWNGYKCQRVTIIEEANPKACEHLAHFFKQWADKWSFPAEIKCSSFDSIRPEYIIVTSNYSIRECFPAEQDYEPLERRFTEIELVHSPLASFTEVEWPEHIAEKPVTEVTSNPCVNEGNVTVSPEPLGNTSNPAVAPKGSASPPPEDIPEHEGSTQEFIVSDEDTEIDEDEVVDILAEGREAKRRKVIED	CRESS2	-	0.44
KU043406	Unidentified circular ssDNA virus isolate cg_1467 Cap and Re genes	MFNLAQNFSMATKTSRPHARRYCFTLNNYTRDEEEAIKQINCEWLVFGHEHSSGQGTPHLQGAITFNKRTYLATLKKLIPRAHFEIMQGNPQQSKDYCTKEDTSSYFEKGIMPKPQHQAGNEANEAKWESAYQAAKEGRFDDIPRSLWIKHMRSFKQIFEDAKQDTDMTEYTDQDLKHHFLWIWGPTGTGKSHTAHRIAKELSPDEPPYIKDLNKWWNGFTKQRVVIIEEADPKRCEHLASYFKKWADKWAFTAEAKGTVFPSCRPEYIIVTSNYSIAECFPEDADRLPLERRFTEQYLPDRKLHIYWPQTQPQQTNTGEPNVGPSDPNEL	CRESS2	-	0.51
KM573776	Dromedary stool-associated circular ssDNA virus isolat DcSCV_c1566	MSRGKRWCFTINNYTEEDTSRCERIDCEYLVFGKEIGEEEHTPHLQGFIVFKNRKTFNVVKRIIGENAHIEIARGTVKEASEYCKKEGQYFEKGELPPEQNERGGQATKRKWEETLKAAKEGRFDDIAPDLYIRYRSSLKAIYQEEVNKNTKEITDFDLKGHFYWIYGPTGTGKSHLARTMAASVDPDTPPYLKGLNKWWSGYKMQKAVIIEEANPETCKYLAPLFKQWCDKWPFTAETKGGSFEHGIRPQYIFITSNYSINECFPDPNDSEPMKRRCHEFFKENKDSWIPLYTDNDTQTFPIEPVHLGLNDKPIDIGTQEMPLLTPELEVLEDG	CRESS2	-	0.51
KM573767	Dromedary stool-associated circular ssDNA virus isolat DcSCV_c1422	MSKKIMSRAKRWCYTLNNYTPEEEQNIQNIECAYHVYGKEVGENGTPHLQGFICFVNRKVFNAVKKLFKTERIHLEVSRGTIEEASEYCKKDGNFFEKGNKPEESHRKGGEATKRKWEEARENAKQGKFEDIPADMWIKYRRSWIAEYTDNLNKDITEIKDIDLKDHFYWIYGPTGTGKSHLARQLAQAFDPDHQPYLKGLNKWWSGYENQKVVIIEEWNPEASKFLGSLLKQWCDKWPFTAETKGGHFVNGIRPERIIITSNWNIDECFNDSHESEPLHRRIREIYKKERETFYPIVLDPDPTQAIPPSPLNLATIPSSQEVIIDSGTINDI	CRESS2	-	0.52
JX904107	Uncultured marine virus clone SOG00781	MRTLYSRGKKDSDHIFENQQVSDHLRTIYKYSVQNFGTRGASLVLPRPPVPCHHGTAKMKSRHFAWTMNNPGPDTEAAVIAIDCKFATFGREVGESGTPHLQGMTSFEHARSLSAIIKLLQKAHPGTHVEICRDAYKSMVYCQKDGDTWQTGTMPKKPADGGGMERDRWKRAYEMAAEGNLEDIDADIKLRFYGTLKKIKEDHQVTPTSLPTLDFHWYQGSSGSGKSKFAHDENPGYYLKSPNKWWDQYEPGQTVIIDEWDPNHKVLASHLKKWADHHPFAAEIKGGTRMLRPPKLIITSNYTIKECFPQENDHLPLLRRFTVKQFGEPQPAGSFDAQSYFGGTFSL	CRESS2	-	0.63
JX904562	Uncultured marine virus clone SI03717	MASSSKRLKKARSFSFTWNNYTEADIARLKGIEHQYLVFGKEVGESGTPHLQGMINFKSPRSFASVMKELEGAHVEKTISSYDSMVYCKKDGDVYEHGKPPVSQKAKGDMEKARWKRTRELAAAGKIEEVDDDIYVRFYGTLKRIKEDHQQVPPAQAELNFHWFYGASGTGKSRAAYAENPNLYIKNSNKWWDGYVDQPCVLIEEWDPNLAMMASHMKKWADHHPFSGEIKGGTKMLRPPKIIVCSNYTIQECFPNEQDWKPLERRFKVRKFGEDPLSHWDAPLPTHAPGSMCPF	CRESS2	-	0.46
KT149407	Circovirus-like genome DHCV-1	MKVKVYTNFKSKKVIRAKYSITLALTWITFSFPSHPTSNMSYQLNWCFTVNNYTVLDEQKLQDMPYKYLIYGREVGEEGTPHLQGYVQYKKKLRLTALKKLHPTAHWEAAKGNEEQNKTYCSKEGDFLEFGTPTKTNGGASTIAARAEKNARLMTAPIEELILTGELHPQHAKAIHNARILVQEERRKLHPPDALDGDLPHLWFWGPAGTGKSYKARTDYPDAYLKAANKWWCGYNDEDTVLIEEWDKNHNVLAHHLKLWADRYPFSGEVKGGTTGKIRPKRIVITSNYHPRDIWGDDPEGALGPIMRRFNVVHFDQKFNF	unclassified	und(circolike)|CRESS2(circolike)	0.33
KM821755	Sewage-associated circular DNA virus-20 isolat SaCV-20_NZ-BS3900-2012	MARSRNYVFTVNNYDDEDEHQCWAMPWEVKDCKYICVGKEIGESGTPHLQGYICFTQLKSLNQLKGFFPSAHFETKRGTHQQAADYCKKDGDFFEWGTLPVDDCGSAGAAAMDELMGHTIECIRNGDYKGIPNAATHFIKAAEYRVLKEQQQDRNLATLDTLTHQWRWGKAGCGKSKPARDANPDAYLKMCNKWWDGYTGQEVVIIEDFDPDHKCLVHHLKIWADRYAFPAEVKGGKIDIRPKTIIITSNYHPRDIFDREPDLEAIMRRFNVTHVLGDLGVDFMQVDNS	CRESS2	-	0.42
KT732816	Pacific flying fox associated multicomponent virus isolat Tbat_K_12099 segment DNA-R	MPLRSRGWCYTVNNWTENDEELVAKLSEQTLYHIVAREIGEEGTIHLQGYCYFKNFKSLAQFKALLPRAHLETQKGTPQEASDYCKKDGDYVESGTLPMSQKRKGDLGREYWEEQLSLAKKGKVEECDPKLQITHFNALNAISARYAPMPPDNEDIDNQWFYGPTGTGKSRKARGDNPGCYLKMCNKWWDGYLGEETVLIEDFDKKHEVLGHHLKIWADRYAFPAEVKGSKVNLRPKKIIVTSNFHPNEIWSDLSTLDPILRRFNVIKFSNPFSYLSPLRYL	CRESS2	-	0.49
JF755415	Rodent stool-associated circular genome virus	MTFRNRGWCFTINNPTEDDSLVALEDVASYVVAGKEVGEEGTPHLQGYCYFKNPKSLAQLKVLLPRAHLEAQKGSHEQAIEYCKKEGDFHEVGTPPMTQKRKGEIGKEFWDEQLSLAKKGRLEEIDSKGHWYYGSTGTGKSRKAREDNPNFYLKGCNKWWDNYQGQEVAIIEDFDKVHSVLGHHLKIWADRYSFPAEVKGSQINIRPKKIIVTSNYHPNEIWTDLATLDPILRRFNIIKFSQFP	CRESS2	-	0.48
JX904344	Uncultured marine virus clone GOM03041	MSQSRNWVGTLNNWTVDEYVQLHSIEGYKYICIGKEVAPGTGTPHLQMCFFFKNKKSLRALQKINGRAYWEHMRGTQEQAADYCKKDGDFEEWGQFSTPKQKGETQKIRFERAWELAKEGNLDDIDSDIKLRFYGTLKRIKHDHMLQEILTDTESQMEWYCGPSGTGKSRKAREENPDAYLKMCNKWWDGYEGEDIVLIEDFDKKHDVLVHHLKIWADRYPFLAECKGSSMKIRPAKIIVTSNYHPTEIWSDVSDIEPILRRFHVTKFGGNF	CRESS2	-	0.52
KP153364	Lake Sarah-associated circular molecule 5 isolat LSaCM-5-LSWO-2013	MSARNFTFTQNNYGDTELVDGVQCRYIIYGKEVGESDLLQLQGVICFNEKIRESAVRKKLPGCHIEIAKVLPAAIEYCKKDGDWTERGDSPMTPKEKGALEKRKWDEIRVACEEGRFEDLPDDIRYKNLRLNKMHRCEALRSRELEDSEAQHLWYWGEAGTGKSRKAREDHPRAYLKMCNKWWCGYTEEETVLIEDFDKKHDVLGHHLKIWGDRYPFLAELKGDTMKIRPKQIIVTSNYHPSAIWFDEETLLPILRRFKCVEFKKLEAST	CRESS2	-	0.51
JX904185	Uncultured marine virus clone SOG05268	MAAKKFRNYVFTRNNYEDTTFEDTLECKYIVYGKEIAPTTGTPHLQGTVCFASPRSFEAVRKLMGCHIEVCADLQKSITYCKEDGDWTERGVCPMTQKEKGESNAQRWRDIRLAAEEGRMDDIPDDVRFHHIRTIEHHRDLASKKRKIADTEEQHLWYYGASGTGKSRKAREENPDAYLKMCNKWWDGYDDEDVVIIEDFDKKHDVLVHHMKIWADRYPFLSEYKGGARKIRPQKIIVTSNYHPEEIWSEESDLGPILRRFKLHKFSTFP	CRESS2	-	0.46
JX904420	Uncultured marine virus clone SI00197	MKKQSRNFTFTLNNYTQEHLTTLEILVEQKAVKGIFYGKEVGESGTPHLQGFICFTTTKSMKQCIKAIPGAHVEFMKGTIEQNVAYCSKDNDFVTLGTLPMTQKKKGEAEKERWEEALAAAKEGRFDDIPADIQFRYDRNIKRIYAENKPKPQTLNKLTNEWYCGPSGTGKSKQARDKYPDAYVKLNNKWWDGYADEETVIIDDFDKYDIALSGHLKRWSDHYPFPAEFKGGVKVIRPKRIIITSNYTPEEIWEEEATLGPIRRRFHITQFKQLKQHHK	CRESS2	-	0.54
KP153404	Lake Sarah-associated circular virus-7	MFCYIKNAISCLRTVKINVFSMPPSRSRAFIFTWNNPTADTEAALESLAGYSYLTFGRETAPTTGTRHLQGYIRFTDGKSLRSARRLLNGAHVEVARTIRQAIEYCHKEGDFVEFGTRPVDDAARGDMEKARWEIAWTKAKTADLEEIDADIRVRCYSALTRIQKDYMVPPLPLPAPCGLWIHGLSGVGKTFAVYQAYPDLYSKNASKWWDGYQNQDHILFDDMDPDVGKWAGRFFKIWADERPFIADIKGGSISIRPKIFIVTSQYTIDECFGEIQTRMALSRRFRIIEKLSLDHEINI	CRESS2	-	0.56
KC248416	Diporeia sp. associated circular virus isolate LM348	MSRNRNYVFTLNNYTPVHEITLNSIPHRYLVYGREVAPTTNTPHLQGYICFPNAKTISAVRRILAGCHVEVARGSHAQCRTYCIKDGDFYEHGDLPADPREIGNAEADRWEDAWEKAKAGAIEEIPADIRIRSYSVLRRIGRDYQPNLALLPATCGYWIKGESGAGKSHSCFTAYPDLYPKGPSKWWCGYQNEEVVLLDDVDPSHGLWIGGFLKRWADKYPFIGESKGGSFKIRPKKFIVTSQYSIEDCFQDVETRVALNRRFRVINKLADQAIII	CRESS2	-	0.54
KT149398	Circovirus-like genome DCCV-5	MRTRRIVFTYNNYPPEYNDDAALNAWLDSLGALYCIAGREVAPGTGTPHLQGYAQYVNPKSITAFRRLFMGCHVEPARGTGSQSRTYCSKDGSFCERGIPPTDENPGNREKQRWEDARSLAKEGKFDQIPADIYIRYIGNLHRIYREILPPLEPLPATCGRWLLGRTGSGKSKGVRSAFPLVYPKPLNKWWDGYDDHTHVLLDDVDHNQSSWIGNFLKIWSDHYPFIAEKKGGSRLIRPELIIVTSQYSIRELFNDNELVLALERRFQVINVNKDEPIEWV	CRESS2	-	0.53
KP153447	Dragonfly larvae associated circular virus-3	MANRRSRGWCFTLNNYTPEHEALLAAVPCAYMIFGREVGANGTPHLQGFVYFPNAKTFNGAKAVLPAGCHLEAAMGSVAQNVEYCSKDGDVEERGERPLSAAEKGASEAQRWKDARLAAVSGDIADVPDDIYIRYYRTLKEISKDHMARPDGLDGVCGLWLYGAAGTGKSRYAQEQFPEHYMKMTNKWWDGYQGQDVVVMDDMDPDHACLRHHLKRWADRYPFIGETKGGAISIRPKKFVVTSQYSIEDMFKNRDGTLDVETVAAIRRRFEVKRFGVNAFNPYNI	CRESS2	-	0.52
KM821756	Sewage-associated circular DNA virus-21 isolat SaCV-21_NZ-BS4169-2012	MSSRAWCFTLNNYSEDDLFEISGWDCKYVVYGVEVAPETGTRHLQGYCMFLGVQRLSAVKKLLETAHWEIARGSPLQNRTYCTKEGDFVEVGTLPLPRGESEKERWAEAFEAAKHGRLDDIPEDIRVRYYRTMKEIKKDHMVKPEDQQDVTGEWFYGEPGVGKSHLAREQYPGAYLKMQNKWWDGYQDEKYVILDDFDCKELGHHLKIWGDKYSFLAETKGGAICIRPEKLIVTSNYKPEQLFSDEMLIAVKRRFKVTHVLSWRAVTNPPV	unclassified	CRESS2(circolike)|und(circolike)	0.54
KT732819	Pacific flying fox faeces associated circular DNA virus-4 isolat Tbat_29894	MGSQLTQRSRNFCFTLNNYTESDTEAVKAIDCKYMVVGFEVGEKGTPHHQGYIRFENARSLGATIKQLPGKPHVEVAKGNASQNIAYCTKSGVFFEKGTRPIDSETCGRNEKRRWTDARAAAKEGRFDDIPDDIYMRHVHAIKRIRMEDGPKPTDLEPRDTYGLWIYGPPGTGKSHFVRTNFRDHYIKGANKWWTGYCGQKYVVIDELSPASGPELSQYMKKWADRWSFEAETKGGNSIIRPYMIIVTSNYSIEEVFSRVDAQAIKRRFTEIKFQ	CRESS2	-	0.56
KP153377	Lake Sarah-associated circular molecule 9 isolat LSaCM-9-LSLA-2013	MSKGNRAWCYTLNNYTEEERDSLRSLKCAYQVFGYERGAADTPHLQGYVQFAHQKTLSAVKKLLPRAHLEERRGTIDQAVEYCKKDGDFEEYGKKPMSQKEKGKEEKNRWKRILEKADEGDEEWLRENEPNVAFKHMATFRSHKKPRVGTLQYEETPHEWWVGPTGTGKSRKAHEEYPNHYAKEKNKWWCGYTGQETVIIEEADPKTMEHLAARLKVWADRYPFPGEIKGGRIEGIRPLRVIVISNYTIEECFANQNDVEPLRRRFKEVKFGERTMPSPWHPSYTL	CRESS2	-	0.43
KT149394	Circovirus-like genome DCCV-1	MATRHVVFTINNWTEEIWLEVTQFDWLYVVVGKEIGESGTPHLQGYGCFHKKQRYATLARKWKGHFEVSRGTPQQASDYCKKGGDYFEKGELPESQSAKGGEATKKLYEDAFSLAQKGEILSIPEPLRTRFYATYKKVAKDYMPKPESLSELKNLWICGEAGVGKTVLADLILPDAYSKNCNKWWDGYQNEPGVIINDLGIEHKVLGHHLKLWGEHRGFIAETKGGALHIRPERIIITSQYEIGQVFEDWETRDAIRRRYKQHKLTGAFTREALIELASKL	CRESS2	-	0.5
KP153360	Lake Sarah-associated circular molecule 2 isolat LSaCM-2-LSMU-2013	MSTRRIVFTKNNWTEEDYRALMEEPLFSYLIIGKEIGEKGTPHLQGYAEFTKKAKYGALAKKYKMHCEVSRGTQDEAIKYCMKDGDYAEKGTKKLDGASAEKNRWEQARVSAKEGRLDDVPADIYIRCYRTLKEIAKDNMPKPESLTELKNLWIYGPAGSGKTRLADAIVPISYSKNCNKWWDGYQNEPGVIINDVGKEHSVLGHHFKLWGEHRPFIAETKGGAIHIRPQRVIITSQYSLTQIWEDEETRDALARRYKVLHLLGNLDLEDIDRISKDYA	CRESS2	-	0.53
KP153369	Lake Sarah-associated circular molecule 6 isolat LSaCM-6-LSGA-2013	MLENDEQPIPSVSIEKPLVSRGWCFTCNNYSESDYNGFLAAESVYLVIGKEISSTGTPHLQGYIYFRTEKSLRTLRKLSDRSHWEPAKGDSDSNFCYCSKGENFIERGTRPATGKRKAANGLAKIKENYAETVELAKKGKLDEIDPGHLLRFYGSIKSLQKDNLVRPSDSEELTGLWIYGPSGCGKSKYVRDTYGQDFYYKLANKWWDGYRQEETVLIEDLGTEHDKLGHHLKLWSDRYAFSGETKGGMLSCRPKRIVVTSQYSIEEIFLDEKTQEALNRRFTKLRLFNLKST	CRESS2	-	0.49
KP153485	Lake Sarah-associated circular virus-39	MYMARNRNFVFTWNNYTEDSEQFLRSRVDEGVIKYVGYCKEIAPSTGTPHLQGFCSFENKKSVQQVRVILVGCHVETMLGSISQNEDYCSKAGELINYGVQPVTNDNKGRAEQLRWQRARESAKLGQFDDIDADIFIRCYSTLKRIRTDYTAKPPPEDVTCYWIYGPTGTGKSHSVETTFPLCYKKNMDDPKWFDGYQGEETVYLEDIDKYQVKWGGLLKRLADRWPLLVNTKGSMQYIRPKRIIVTSNYNLDEIWSDSGTLDPLLRRFTVILKESQEQVIDFT	CRESS2	-	0.46
KJ547648	McMurdo Ice Shelf pond-associated circular DNA virus-3 isolat alg49-39	MSKNRNFVFTWNNYSDASKTYLSTLACKYVAYAEEVAPTTGTRHLQGFIAFTNAKTIQQARSKLPGCHVETMNGSIAQSEDYCSKAGTLTEHGTKPISNDNNGRAEKLRWQRARDFAKEGKLDEIDADIFIRCYSTLKRIKSDYATKPQPIDPVCIWIYGPTGTGKSHAVETRFPNCYKKCMDDLKWFDGYAHEDAIYLEDIDKYQVKWGGILKRLADRWPMQASIKGAMAYIRPKFVLVTSNYRIDEIWTDPQTLEPLQRRFTEIEKLTQEQVIDFDQ	CRESS2	-	0.48
KT149412	Circovirus-like genome DHCV-6	MSRHRNYCFTYNNYPNTELVDNVNCKYIAYAHEVAPTTGTRHLQGYIAFHSTKTLAAARRLLPGCHLSAMAGSISQNDAYCSKSGTLIERGEKPASNDDKGRAEKLRWQRARDLAKAGNLDEIDADIYIRCYSTLKSISKDHMIKPEPVDVKCFWIHGATGTGKSYCVETTYPDCYKKSMDDLKWFDGYDNQDVVYLEDFDVYQIKWGGLMKRLADRWPMQASIKGSMKYIRPKIVIVTSNYTPNEIWMDPQTVEPLLRRFKVIEKVSQEQVVDFT	CRESS2	-	0.55
KP153468	Lake Sarah-associated circular virus-32	MLNPIRRRSRKVPLQSQMSAPPCGLSYLPIKPTPFLHPISVSTMSFQSKRWCFTLNNYSAEEHQALQLAFKASTVKYAVIGIEKGESGTPHLQGFVVFMTAKRLSALKKINPRAHYEQAKGTSLQASTYCQKEGVFEEFGTLPLEPTAVGSNASNKKNESYRKAMDLAKLGDFSAIEQEWPGLWLRHRNAFLSAPRDFGIRPKDLDYLPGIWIWGPAGVGKSRLAREVFPLSYEKRLNKWFDGYSAQKAVLIEDIDQSHRYISHDLKIWTDRYSFPAEIKGGAIQCRPEHVLITSQYHIHDIWDDVQTREAINRRCFVIYIDKATSTAYKSALSALNQLIRSRAPVGECTVAPVVLSDVSDTNPVVPSPPEAVLPVLFADPSDLSVLD	CRESS2	-	0.4
JX904559	Uncultured marine virus clone SI03701	MPVKPVITKSKAPTCGKANAWMFTIHNPTSEHDPTQWEGVRYVTWQLEKCPTTGTPHYQGYVEFEKQKRLAGVRKVCQCHWEMRMASQQEAIKYCNKEATREDGPWESGTPAKGQGNRSDLDKMCELVQAGTNMREVALSNMPMFVVHNRGLAILAQTIGVKYNHDDVRGVWYWGGPGTGKSRKAREEYPDAYLKSQNKWFDGYIDQDAIILDDLDKLGGDKLGHHLKIWADRYACNGEVKGSQVNLKHKVFVITSNYHPDELWPDDEQMLEAIKRRFKITHFPNTPFNKKKDTVANQIKESQSYTQCPFGCPDTDACMCVQSGRAERQLSGV	unclassified	und|und(circolike)	0.09
JX904605	Uncultured marine virus clone SI04276	MARSRNWVFTLNNFEDNQEPTVWKAKVDYCTWQHEIGESGTPHLQGYLELGTVQRLSAMKKLNSVAHWEPRRGSQEQAIEYSNKEETREAGPWSYGEKKEQGKRNDLEKMSRDIVDNKRKFNEVAMEYPHMVVKYSKGIDRLIAACQESYAHDNVRGLWYYGEPGTGKSRKAYEENPEAYRKAQNKWFDGYQGEKTIILDDLDKGGACLGHYLKIWGDRYPCSGEIKGGTVCLNHTSIIVTSNYSIQELWPEDTQMASAIKRRFKCVHFGSITMKEKEPIANLQNQRNNRI	unclassified	und|und(circolike)	0.12
KR528557	Hermit crab associated circular genome isolate I0085b	MISKRWCYTLNNYSEDDVVTMKAVPTTYHVLGKEVGTNGTPHIQGFLTFKSNKRLSAMKKINARAHWEVAKGTSKQAADYCKKDGNFEELGSVPSQGKRTDLEDAAVMITAGESLKRVAEEHPTVVIKYHKGLSALKSLLSESRETDDVRGIWLHGPPGCGKSHLARTVSPYLKAQNKWWDGYANEEYVLIDDFDKGGKCLGHYLKLWADKYECTGEIKGATVALNHRKFIITSNYHPDEIFDDDSVLLEAITRRFSIRSCWHHSREADAVWFDSLTKKEAHAATANK	unclassified	und(circolike)|und(circolike)	0.25
JX904368	Uncultured marine virus clone GOM03161	MNRAWCFTLNNYDELAVEHVRSVLASDKIRYAIFGYEVGESGTPHLQGYVAFLKPQRLSACKKAIARAHWEPAKGNEEQNYEYCSKEGNFEEFGVRSKQGKRTDLDKAIEHLKEGGIKRVIEETPREYVKFHRGLEALEYRLNNQPYNHDSVRGVWIWGPPGSGKSHAAREFDPDAYLKAQNKWFDGYSNQKTIILDDLDTPTLGHHLKIWADKYACDGEFKGGTVHLRHTTFIVTSNYTPDQLWPDDPVMCQAIKRRFIMNHKQFKQTKVQYQPNAPQV	unclassified	und(circolike)|und(circolike)	0.14
JX904395	Uncultured marine virus clone SI00006	MSYAKNWCFTLNNPSSTDEETIKAWHPDIASYCIYGRETGDSGTPHLQGYVQLCKKKRLTGMKKLLPTAHWEPAKADFEKNYSYCSKDGDFVVHGEHAKAGAPTMQQRIAKNKRLRDTPLNELVDAGDISIMDVRKLKNAKLDLDQEKPAFVANDVRGTWIYGPPGTGKSRSARADYGDDIYLKAQNKWWDGYTGQQTVILDDMDNDALGHHLKIWTDRYACTGEVKGGTINLQHRKFIVTSNFSIDELFEKPQIAQALKRRFTVVHLTGNEEPPGMHPIFTYT	unclassified	und(circolike)|und(circolike)	0.31
FJ959082	Circovirus-like genome CB-A	MSRSRNWCFTYNNYDSSPRIQKCMKYLTYGYEVGESGTPHLQGFVIFKNAVAKPSQYFKPAYHFEKARGTPQQALEYCQKDGNFKEFGEKPKTVADGGAAGGEANKRRYEEAFSAAKEGRMDDIPADIYIRHYSTLKKIRFDHAPPAQNNDVLNNYWVYGPSGTGKSKSVREFFGKSLYVKNQNKWFDGYEGEDFVLIDDVHPNWSGKTILKIWSDHYPFSPETKGGHIKMIRPEGIIVTSNYTIEEMYEAEEDRQPIRRRFKVIKSEAGYDVIMKEYNKRVAATKICSNTDEDVVVAEHEPCRPATRASAPGDHELPPPATEVQSIVVAVIESPPPPATTDQ	CRESS2	-	0.58
KF738877	Dragonfly larvae associated circular virus-4 isolat DflaCV-4_NZ-PG3-LG	MGLLRVYYSGQQARRLVILAVVWPMVGTTQRSRGWVFTINNYNEWDFVNISKLEEKAQYYIYGKERGEEGTPHLQGFAYFKQRISFNGIRDILTRAHVEIQRGFNAQAIDYCKKEGEFTEWGEPSRGPAGQKDKWKDVLQLARQGKVQEIEERYPAIFLRYFQKLCGFYRPEHSIILENFTNEWWWGPTGTGKFKKLNDDYPDPYEKSLDPWWDNYQREEIVAIEEFEPRCKINSFLLKRWADRYPFRCEVKGAFLSKLRPLKIIVISNYQLDECFPNSKDLDPLKRRFKEIHFP	CRESS2	-	0.38
KP153483	Lake Sarah-associated circular virus-38	MSNKMAKNWCMTLNNYDDSEVARFESHMRPWCVYYIYGFERGENDTPHLQCFFSLKAKKRMSCLKKIFPRAHFEVKSRASTMEQASDYCKKEENFIEWGVLPDNSTARGLKAISDNYEETVELAKKGDIEAINPEHVLKYYPTIKRIAHDNKKMPSDLLWEEGHPPNIWIYGPTGTGKSYRARAILQENFGQFYSKMAQNKWWDKYDGEEGVLIEDMDILHNYMGPYMKIWADKYAFPVEVKTSGDRIRPKVIVVTSNYTIEQIWPDRSTHGPISRRFKVIHMDQPWNANINQVLRDAPAETSAPREKKRKFDQPLKKPALLRRNAVGDLVETHGYQPQQTIPQYLEPTLEELAEEMEIYRASQDMFEELSESDDLLDL	CRESS2	-	0.38
KM821768	Sewage-associated circular DNA virus-33 isolat SaCV-33_NZ-BS4147-2012	MPSSNSIQARYWLLTINDTDDNVSWSPPTAINTGPWTIVQWLRGQKEIGTNTNREHWQLFVAFKKKIRLSPVKQLFGGARVHAEPSRSEAAEEYVFKEDTAIANTRFELGAKAFNRASKTDWALAKKCAKEGNIDGVPDDVYIKYYNTLKTIAKDNMKPAENLDAVCGIWYYGPPGVGKSHRARSEFPGAYMKMQNKWWCGYQNEDFVILDDFDSKQLGHHLKIWADKYAFIAETKGYAINIRPKKFIITSNYSIDQIFCEDSVLANAIKRRFEVREIPLRLF	unclassified	CRESS-Rec1(AlphaNanoSmacolike)|und(circolike)	0.18
JF755408	Rodent stool-associated circular genome virus	MSRYYMLTIPYSLFTIPDPLPEGLVWLKGQPERGENGYEHWQLICCTRKKCRASAVKRLFCPQAHVELTRSAAADEYVWKDDTCMDTTKRFELGRKPLSRNQEKDWEAIWESSKKGKLDEIPADVRVRSYKTIRQIEKDHMIPQGMVRTVHVFWGSTGMGKSRRAWYEATMLAYPKSPTSIYWDGYAGHSNVVIDEFRGGINISHMLRWLDRYPVCVECKFGACVLNANTIWITSNIHPRDWYPDLDPATIDALLRRLNVVEFLEEWVPPHEGLEEAMNELEDIRDAEDWNGGPIDLTQETIVLSSDEE	CRESS-Rec1	CRESS-Rec1(AlphaNanoSmacolike)|CRESS-Rec1(circolike)	0.93
KR528560	Palaemonetes kadiakensis Mississippi grass shrimp associate circular virus isolate I0099	MREKERNNTAAPHEPVSRDPGSIRRTKSIKRDAVSLSRRVARWWLLTIPEDDWNPPADLPAGVAHLKGQLESGAEGGYRHWQVMVSFTTQVRLPAVKALFSRTAHCEPSRSDAVDKYVWKEDTRVPGTQFELGRAPVKLNSKPDWDAIWDAAKAGNIEAIPAGIRVRSYANLRRIRSDHAVALPVERSCRVFVGPTGTGKSHRAWSEAGMDAYPKDPRTKFWDGYRDQLHVVIDEFRGGIDIAHLLRWLDRYPVNVEIKGASMPLAAKGIWITSNLAPNLWYPAPQHTATLYHPGIRYWSKCCAE	CRESS-Rec1	CRESS-Rec1(AlphaNanoSmacolike)|CRESS-Rec1(circolike)	0.83
KF738873	Dragonfly larvae associated circular virus-1 isolat DflaCV-1_NZ-PG11-LD	MPLSDHRSPAPGSRLSVRRQGIFWMLTIPHHCFTPYLPPGCVWIRGQHELSLSGYSHWQILVAMSTKSSLAQVKSVFGEQCHAELSRSESAQDYVWKEDTRVDCSQFEFGSKPIRRNSRVDWESVWSAAKSGDLLQIPANVRVVSYRTLRAIKADYEVPQSMERTALCYWGPTGTGKSLRSSREAGIDAYYKDPRTKFWCGYRGQQHVIVDEFRGAIDISHLLRWLDRYPCYLETKGSSTSNCVTKFWFTSNLHPDFWYPDLDELTRLALIRRISVLEITELDTSLLP	CRESS-Rec1	CRESS-Rec1(AlphaNanoSmacolike)|CRESS-Rec1(circolike)	0.88
KP153495	Lake Sarah-associated circular virus-41	MANGKSTRRQGIFWLCTIPSPNEVCAQLELGTLPVGLVWCKGQKERGSGTGYEHYQLVAAFAKKVSLPGVVGMFGRGTHGELSRSEAANEYVGKEETRIGTTFELGAKPIRRNSKTDWESVWTAAKSGDLSAVPANVRVVNYHALRAIRSDHAVPVGVERTVHVFWGSTGTGKSRRAWEEAGIDAYTKCPRSKFWDGYQDQQHVVVDEFRGGIDVAHLLRWFDRYPVRVEIKGSSRPLVANTIWITSNKDPVEWYPELDLATLEALLRRLTIVHFP	CRESS-Rec1	CRESS-Rec1(AlphaNanoSmacolike)|CRESS-Rec1(circolike)	0.56
KJ641736	Bat circovirus isolate BtRh-CV-5/Tibet2013	MERRTQRRQGIFWILTIKHAEFTPYLPPGCAWIRGQLELGESNSFLHWQIIVAFSKKMALSGVRRIFGTAHAELTRSDAAAEYVWKEDTQVPGTQFELGAKPIQRNSKTDWESVWTSAVSGDLSAIPANVRVVSYRYLKNNSRTLRAIAADHSTALPMLRDCWVFWGRTGTGKSRRAWDEAGLDAYSKDPRSKFWDGYQTQQCVVVDEFRGGIDISHILRWLDRYPVRVEIKGSSRPLVASKIWITSNVDPRQWYPDIDAETLGALLRRLNITHFH	CRESS-Rec1	CRESS-Rec1(AlphaNanoSmacolike)|CRESS-Rec1(circolike)	0.88
KF738874	Dragonfly larvae associated circular virus-2 isolat DflaCV-2_NZ-PG8-LS	MARRQGIFWLLTIPRHEFVPYLPPGCVWIRGQLEEGGEDGYLHWQVMVAFTKKIGLSGVKVLFGPAAHAELSRSAAATQYVWKEETRVAGTQFNLGAKPFERNSKRDWDSIWLSAQEGNLEAIPADVRVVSYRTLRAIGSDYAVPRALERTCYVFWGSTGTGKSRTAWEQAGMDAYCKDPRSKFWDGYCSQENVVIDEFRGGIDISHILRWLDRYPVRVEIKGSSRPLQATKLWITSNLDPNLWYPDIDAETLLALRRRLTITHFA	CRESS-Rec1	CRESS-Rec1(AlphaNanoSmacolike)|CRESS-Rec1(circolike)	0.93
KJ547630	Sewage-associated circular DNA virus-6 isolat SaCV-6_NZ-BS4017-2012	MGEARRQGVYWLLTIPHADWTPYLPPGITWIRGQLESGSDTGYLHWQIIVGCSKKKSLRGIQEIFGRTCHAELGRSEAAAAYVWKENTRVEGTQFELGKKPFKRNCATDWDLIWESAQRGDFMSIPADIRIHSYRTLRAISADYAKPIEMERTCYVFVGPTGTGKSRRAWSESGMEAFCKDPNSKFWCGYSGQSRVVIDEFRGRIDVSHLLRWLDRYPCNVEIKGSSVPLCAESFWITSNLDVDQWYPELDEPTLAALKRRLKITHFRTLQ	CRESS-Rec1	CRESS-Rec1(AlphaNanoSmacolike)|CRESS-Rec1(circolike)	0.68
KM821762	Sewage-associated circular DNA virus-27 isolat SaCV-27_NZ-BS4103-2012	MERRQGIYWLLTIPFHEWTPYLPPGVSWIRGQLESGSESGYLHWQIVVALTTKCSLRGIKGLFGDSTHGELSRTNRASVYVWKEETRIEGTQFELGERPFKRNCSKDWEQIWECAQRGDLMSIPADVRVHSYRTLRAISADYSKPLPMVRDIHVYIGPTATGKSRRAWDEAGMEAYCKDPNSKFWCGYSGQPNIVLDEYRGRIDVSHLLRWFDRYPVNVEIKGSSVPLCAESFWITTNLDVDQWYPDLDATTLEALRRRLKITYFR	CRESS-Rec1	CRESS-Rec1(AlphaNanoSmacolike)|CRESS-Rec1(circolike)	0.78
KJ547631	Sewage-associated circular DNA virus-7 isolat SaCV-7_NZ-BS3976-2012	MARRQGIYWLLTIPHSEFTPYLPPPVAWIRGQLELGAGGYLHWQAVLAFRSKGSLATVQAIFGTAMHAEISRSSAASDYVWKEDTRVSGTQFELGERPFKRNDPRDWDAIWEMAVAGNLCGIPASVRVQSYRTLRAICADHSKPVGMERTCFVFWGRTGTGKSRRAWDEAGVDAYSKDPNTKFWCGYNGQRNVVIDEFRGRIDVSHFLRWLDRYPVNVEIKGSSTPLCCERVWITSNLDPRAWYSELDEETLNALLRRLNITHFL	CRESS-Rec1	CRESS-Rec1(AlphaNanoSmacolike)|CRESS-Rec1(circolike)	0.92
KF133825	Circoviridae 18 LDMD-2013	MRRQGIFWMLTIPHASYTPYLPPDVTWTRGQLESGDGGYIHWQLLVGFAKKVSLRRVREVYGPIHAEISRSESAAAYVWKEDTRIDGTQFELGARPFRRNSATDWEAVWESAKRRDLESIPAQTRVVCYRSLLAIAASYDVPKPIVKSVYCFYGVSGSGKSRRAWDEAGVEAYSKDPRSKFWCGYQGQSNVVLDEFRGGIDVAHLLRWFDRYPVRVEIKGSSVPLAAERIWITSNLAPLQWYPELDPLTYEALMRRLDVTEFA	CRESS-Rec1	CRESS-Rec1(AlphaNanoSmacolike)|CRESS-Rec1(circolike)	0.76
FJ959081	Circovirus-like genome RW-E	MIRRQGVYWLLTIPEDEFEPHLPQDCAYIKGQKERGEHTGYLHWQVLVVLRRKGSLSTITGMFGVSCHAELSRSAAASEYVWKEDTRVGDQFEFGTLPFKRNDPKDWEQIWERAKAGDINGIPADVRIQCYRTLRTIRADFAVPEAMVRQCFVYCGPTGTGKSRRAWAEAGMDAYPKDPRTKFWDGYRDQKHVVVDEFRGAIDISHILRWLDRYPTLVEIKGSATCLVAEKLWITSNVHPNEWYPMLDSATVDALLRRLQITVFE	CRESS-Rec1	CRESS-Rec1(AlphaNanoSmacolike)|CRESS-Rec1(circolike)	0.92
KM821767	Sewage-associated circular DNA virus-32 isolat SaCV-32_NZ-BS4194-2012	MPAPQHRYFLLTIPHNDFLPWLPHDVAYIRGQLESGNENGYLHWQLLAIFKRKLTVTAVKRTFGDRSHVEPSRSAAADEYVWKEETRVAGTQFELGARPVRRNVQTDWDAVRVSAKRGALDDIPADIFVRCYGQLRKIAEDYVEPAAIEREVYCYWGDAGTGKSRRAWAEAGLDAYPKCPRSKFWCGYRGHEHVVIDEFRGGIDVSHFLRWLDRYPVIVDTKGGATSLKARKIWITSNLPPEEWFPGINQETLQAIRRRMTIIHYRRGLEPNPN	CRESS-Rec1	CRESS-Rec1(AlphaNanoSmacolike)|CRESS-Rec1(circolike)	0.9
KP153393	Lake Sarah-associated circular virus-1	MSQGIYWLLTINQHEFVPYLPAGVSYIRGQLEMANNQGADTGYLHWQLLVVFSRKCRLAAVKKLLGNTVHAELSRSAAATDYVWKEDTRVAGTQFELGAMPMQRNNPTDWDTVRNNARAGRLGDISGDIYVRCYNQLKRIACDHMQADPVEREVVCYWGRTGTGKSRRAWDEASLDAYPKDPRSKFWDGYRGQEHVVLDEFRGGIDIAHVLRWFDRYPVMVEVKGSSVPLKATKIWITSNLPPESWYPELDDETKQALRRRMNITHFI	CRESS-Rec1	CRESS-Rec1(AlphaNanoSmacolike)|CRESS-Rec1(circolike)	0.9
KT149408	Circovirus-like genome DHCV-2	MPAIPDQQRWWILTIPHADFTPYLFAGAKYVRGQLELGAGTGFLHWQIVVQFEKPQRLTAVKKLLGQSVHAEPTRSEAAVEYVWKEDTRVDGTQFELGNRALRRNDKKDWNQIRDDAKSGNMDDIPADVYIRCYNSLRRIGVDHLVPVAVEKRVFVFWGATGTGKSRRAWEEAGISAYPKDPRSKFWDGYRSHESVVIDEFRGGIDISHMLRWLDRHPVIVEVKGSSVVFSARTIWITSNLSPDTWYPGIDEETRLALRRRFTQVVHFNAELGQ	CRESS-Rec1	CRESS-Rec1(AlphaNanoSmacolike)|CRESS-Rec1(circolike)	0.7
JX904478	Uncultured marine virus clone SI00898	MVPIPQARYWLLTIPHAEFVPYLPPGFNWIRGQLELGAEGYLHWQIFVSCVQKSRRRGITSVFGTGIHAEPSRSAAAEDYVWKEDTRVEGTQFELGTKPVNRNSPADWTAIRTSAVAGDLAGVPSDVYVRCYHQLRSIGKDHLQPVAMVRTCNVFWGRTETGKSRRAWEEAGLEAFPKNPRSKFWDGYRDHEHVVMDEFRGAIDISYLLQWLDRYPVIVEVKGSSVVLRARTFWITSNLDPRLWYPDADAETMSALMRRLTITHFQ	CRESS-Rec1	CRESS-Rec1(AlphaNanoSmacolike)|CRESS-Rec1(circolike)	0.83
KM821754	Sewage-associated circular DNA virus-19 isolat SaCV-19_NZ-BS4128-2012	MSQARFWILTIPHADFTPYLPPNVNHISGQLERGTGLNQYLHWQIVVSFARKIRLGGVKSIFGDSCHAEPTRSDAARKYVHKKDTRVDGTGFELGTLPIRRGESCDWEAVRENAKRGRMDDIPADIFCRLYGNLKRIAVDNMAPIGLERTINVYWGRTGTGKSRRAWAEAGMDAFPKDPRTKFWDGYRSHRHVVIDEFRGGIDVAHLLRWFDRYPVVVEVKGSSVVLAAETVWITSNLDPRQWYPDLDEETLAALLRRLNITHFTI	CRESS-Rec1	CRESS-Rec1(AlphaNanoSmacolike)|CRESS-Rec1(circolike)	0.89
KM874295	Avon-Heathcote Estuary associated circular virus 3 isolat AHEaCV-3-NZ-3030C2-2012	MNQARFWILTIRHADFLPYLPPTVDYLRGQLERGDGGFLHWQLVVHFARKVRLGGVKGIFGDSTHAEPTRSDAAREYVWKEDSAVPNTRFELGKIPVRRGVSHDWDAVRESAKRGRLDDIPADIYCRLYGNFKRIAVDHMVPLGIEREVNVYWGVTGSGKSRRAWNEAGLDAFPKDPRTKFWDGYRGHENVVIDEFRGGIDVAHLLRWFDRYPVVVEVKGSSVVLSAKHIWITSNLDPREWYADLDAETLAALLRRLKITQFAI	CRESS-Rec1	CRESS-Rec1(AlphaNanoSmacolike)|CRESS-Rec1(circolike)	0.9
KM821751	Sewage-associated circular DNA virus-16 isolat SaCV-16_NZ-BS3759-2012	MKARFWILTIPHADYLPFLPNCCVWIRGQLERGSATGYLHWQLVVGFKQQCRLATLKRTFGDSCHAEPTRSNAADDYVWKPESRIDGTQFELGAKPMRRNDSRDWDAIRDAAKRGDLETVPSDVFVQHYRSLRTISADYAEPVAIERTVHVYWGPTGVGKSRKVWELAGEDAYPKCPNSKFWDGYRGHTNVVIDEFRGRIDISHILRWFDRYPVLVEIKGSSTVLRAQNIWITSNLDPREWYTDLDELTKLALLRRLNVIHCPLALY	CRESS-Rec1	CRESS-Rec1(AlphaNanoSmacolike)|CRESS-Rec1(circolike)	0.93
KP153500	Lake Sarah-associated circular virus-44	MEKIRYYILTIPHYAYTPFLHTSCNYVRGQLEQGASGYLHWQMVVFLKSPQRRSFVKKLYGDEAHIEPTRSAAAMEYVWKQETSVPNTQFELGSLPTSRCSSKDWDAIRSSAVEGRMESIPSDVYIRCYNSLKRIAVDHSKPVCIERKIIVYYGPTGTGKSRRAWDEAGFDAYPKDPNTKFWDGYNGHKNVVIDEFRGIINISNVLRWFDRYPVLVEVKGSSAVFKAENIWITSNLHPDDWYPELDPATKLALKRRLLIVNIL	CRESS-Rec1	CRESS-Rec1(AlphaNanoSmacolike)|CRESS-Rec1(circolike)	0.88
JF938078	Bat circovirus ZS/China/2011 isolate YN-BtCV-1	MPCLQARYWLLTIPYEHFTPYLPPNCAYIKGQLEQGSNTSYLHWQLVVYFSQKKSLNYVKLIFGDGIHCEPSKSKAAEEYVWKEDTSIPGTQFELGKNSIKRDSTKDWDLIVKHAREGDFASIPGDVLVRCYGNLKKIRVDSLQPESIVREIYVYYGRTGAGKSRRAWEEATLSAYPKDPNTKFWDGYAGQECVVIDEFRGAISISHLLRWLDRYPVIVEIKGSSCVFKAKKIWITSNLSPDDWYPDLDAETKSALRRRFTEVVHFN	CRESS-Rec1	CRESS-Rec1(AlphaNanoSmacolike)|CRESS-Rec1(circolike)	0.78
KJ547632	Sewage-associated circular DNA virus-8 isolat SaCV-8_NZ-BS4075-2012	MSQDPLWKMQGRYWMLTAPAASFTPYLPPTVLYIRGQLETAASGFSHWQLLVITGKVRGSKLKTIFGDDVHIELTRSAAADDYVWKDDTYVDGTRFELGRRPKQLSKTTDWDDIWKSAVDGNLEDIESHVRVRYYNSLSRIRQDHLRPIPLERSCSVYWGRTGTGKSRRAWEEASMDAYPKNPRTKFWDGYRGHEHVVIDEFRGGIDIAYMLQWLDRYPVIVEVKGSSTVLRATRIWITSNIDPRDWYPLADQETKDALLRRLNITHFL	CRESS-Rec1	CRESS-Rec1(AlphaNanoSmacolike)|CRESS-Rec1(circolike)	0.59
KP153373	Lake Sarah-associated circular molecule 8 isolat LSaCM-8-LSWO-2013	MGSRRQGIFWLLTIPRADWEDPGELPEWASWIRGQAEVGEGGYDHWQVIVAFKTKKSLQACKLLFTNTTHAELSRSAAAADYVWKDDTAVPDTRFEYGAKPIRRNAKVDWEAVWTAAKSGCLDKIPASIRVQSYSSIRRIECDYSRPVPMERQCHIFWGSTGTGKSRRAWAEAGDDAYPKDPRTKFWDGYQGEANVVMDEFRGVIAVGNLLRWLDRYPVRVEVKGSSRVLLCKSMWITSNLPPEQWWPDLDAETFAAFRRRVKVTQFHLPLINEN	CRESS-Rec1	CRESS-Rec1(AlphaNanoSmacolike)|CRESS-Rec1(circolike)	0.88
KT149406	Circovirus-like genome DCCV-13	MGTTERARYWMLTIPHEDWTPTIVLPSGVSYLRGQAEIGATGFKHWQLLAIYPKQVRLATVKSSFVRSAHCEPTRSKAADDYVWKEDTAVDGTRFEMGERPHRRNVKADWERVWESAVAGDILSIEASIRIQHYRTLRTIRADYSKPTPFERRIIVFYGPTGTGKSRRAWEEAGWTAYPKDPRSKFWDGYSDQKNVVFDEFRGGIDISHILRWFDRYPVLVEIKGASTCLVAENIWITSNLHPKDWYPDLDYVTYQALERRLEIVHIQ	CRESS-Rec1	CRESS-Rec1(AlphaNanoSmacolike)|CRESS-Rec1(circolike)	0.89
KM598395	Odonata-associated circular virus-12 isolat OdasCV-12-US-1518LM1-12	MSNRRQGTYWLGTIPFALWIPFLPAGCSFIKGQREIGQESSYEHWQVFVITTTKQSLHGIKRIFGIQGSHWELTRSSAAEEYVWKEATRAGDQFQFGERPMRRNSHTDWEVVKEKAKCGDLEGVPSDVFIRYYRTLTAIAADYCVPPFTERSAKVFWGPTGTGKSHRAWSEAGASAYSKDPRSKFWCGYRGQTSVVIDEFRGGIDIAHLLRWLDRYPVNVEVKGSSRALLADSYWITSNLHPRDWYPELDGPTVGALMRRLEVIEINELVL	CRESS-Rec1	CRESS-Rec1(AlphaNanoSmacolike)|CRESS-Rec1(circolike)	0.93
KT149401	Circovirus-like genome DCCV-8	MRQARYWICTIPRDSWTPELPNGAAWCIGQPERGESGYLHWQVLVSFPSKKTIAQVKAAFGLQGMHVEATRSSAAEAYVHKEETRDGDPFEFGSRAVNRNNAADWDRVKELAQAGNLDLVPADIYIRYYRTLTAIASDYEVPVGIEKNVFVFYGRTGTGKSRRAWEEAGPGAYSKDPRSKFWCGYRSDEHVVIDEFRGGIDISHLLRWLDRYPVRVEIKGGSRPLKATKIWITSNLHPMNWYIDLDQETKNALIRRLQITEFQ	CRESS-Rec1	CRESS-Rec1(AlphaNanoSmacolike)|CRESS-Rec1(circolike)	0.73
KM821759	Sewage-associated circular DNA virus-24 isolat SaCV-24_NZ-BS4091-2012	MSRSQHLYWIGTISIQSFPTWNPEEYFSQTDDLQYIRGQKEEGEGGFQHWQVLMVFSKKKRLSWITSRTPGHWEPTRSVAADQYVWKEETAIPNSRFEFGERRIRRNSKTDWAIVLQAARERRLGDIPEDIVVRYYGNIIRIGSDNLRPIEQVRTCKVFWGLTGTGKSRRAFEEAGMECYVKNPRTKWWDGYAGQKNVVIDEFRGGIDVAYLLLWLDRYKVIVEKKGGALCLEALQFWITSNISPKDWYPELDDETQGALRRRLTEVVHFDVAFE	CRESS-Rec1	CRESS-Rec1(AlphaNanoSmacolike)|CRESS-Rec1(circolike)	0.93
KP153508	Lake Sarah-associated circular virus-49	MSNAQRSGRTQGHWFIGTCRDLDWDGRDHPQFISYGKGQLELSESGFRHWQFVVQCKDSTRIAKLKKWLPTCHWELTRSESAIDYVWKEETRIEGSQFEFGVRRLRRNAATDWDVIKQRVLAGSVTSNDIPADVFIRYYSQLKYNPFYRRSIAKDFARPTPIIRSCIVYWGPTGTGKSRRAWAEASSRAYVKDPLSKWWEGYQGETHVIIDEFRGIIQPAHLLRWLDRYPVSVECKGGSTPLRAEKFWICSNLHPSQWYPELDGATYSALERRMEIVEMAENWEPIESEELIEVSE	CRESS-Rec1	CRESS-Rec1(AlphaNanoSmacolike)|CRESS-Rec1(circolike)	0.9
KM874359	Avon-Heathcote Estuary associated circular virus 26 isolat AHEaCV-26-NZ-2311TU-2012	MPSRQGVYFIITVPYEKYEKPIELPRGFRYISGQGEIGASGYHHWQIICAFEQKKTLTGAKSYFAPEAHLEFTRSRCARDYCHKEETRIPDSSFEFGTYPTRVNNKQDWDLVLEKAKKGQFDLIDGDVMMRHYNNIRKIYSDFQKPVKREVQVVNVYWGQTGTGKTKSVFEEIGDDFYVKMPSTKWFDGYRGQENVVIDEFTGQVDITHLLRWLDQYPCTVEVKGSQVFLNTKKWWITSNIDPAKWYEGKDEEQIKALKRRFTNVVHYLKPFKK	CRESS-Rec1	CRESS-Rec1(AlphaNanoSmacolike)|CRESS-Rec1(circolike)	0.76
FJ959083	Circovirus-like genome CB-B	MPPSKPSWYWILTIPEQCWQPPQTLPPYATAIKGQLEIAPTTGYRHWQVAVKLKNKQRLSGLKALFPPETHAEPTKSSAAWDYVGKEETSVAGTSFQLGKVPSKAVDWDQVKDLAVKGQFSEIPSGTLLRYTNNIIRVHSLFARPLPRETALAKIYYGPTGTGKTHRAWQEASGHAYIKSSSNKWWDGYMGEINVIIDEFDSLINITHLLRWLDKYPCSVEVKGGTLPLKATHFWITSNKAPELWFPEASLAQKEALMRRVIVEEMTQKYITQE	CRESS-Rec1	CRESS-Rec1(AlphaNanoSmacolike)|CRESS-Rec1(circolike)	0.93
KT149411	Circovirus-like genome DHCV-5	MSSITMTQPVTKACDKTNRSRLTCFTIFDMSIDLQSLASRFDYMAVGRETCPSTQREHFQGFAYCKTAQRFPWWHKRLTPHHFEFCFGSLEQNERYCSKQGQYQEFGIKPMGDGKRRDLSEVCDAIVTKRQKLSDIAIQFPTVFTQYHNGLTKLEAIITKPYEHHTVRGTWIQGVPGAGKSHYARTHFQDVYIKAQNKWFDGYTGQHTIILEDFDSHGHYLAHLLKIWSDKWSCSGEIKGGTVALQHRDFVVTSNFSIDEIFTDSKFAEPIKRRFKLITMDTEYISPDS	unclassified	und(circolike)|und(circolike)	0.07
KP153488	Lake Sarah-associated circular virus-40 isolat LSaCV-40-LSCO-103520-13	MEETTTEKSVISTGGGPQSSRTWCGTLNNYSQGEYEFLVQEFNKVAEYWIIGKEKGQEGTPHLQMACSFTRAQKLNYLKQNLSVRAHWEITKGTLDQNRVYCMKEGDYTEGGAPPVKKQGKRTDIEMAVETLKATGGDVQEMALTHPEAYVKYSSNFEKLAQRYQKKMRSSGSGYVHDRRVIWIYGPSGTGKTRYVHEKELISNLWISGRDLRWWQSYDMEPAVLFDDFRGDFCKYHELLRILDRYQCTVENKGGSVSLQNVKRIWITSCFHPRHVYDTREDIEQLIRRIDKIWHFTSTTKTDVTNEKEYPGKPGGAAPDFITPLALVRTKAVIPESPPTPTNSRPNSKRSSTIGTELDMVISRGVATQPLVVLDSDEEEELPGQPDSSWAASQWKRAV…	unclassified	und(circolike)|CRESS3(circolike)	0.26
KM821752	Sewage-associated circular DNA virus-17 isolat SaCV-17_NZ-BS4236-2012	MTPTPKKSYCFTLNNYTEDELAAIRGVCSTLAQYAIVGREVGEQGTRHLQGYIRFTRAYRFPTIKDRYLPRCHIEVSRGSPRQNRDYCSKDGEFDEYGELPEDRASSSREDLAREFARDATDGRGGVRRFAESNPGTYYFSGHNLLRNHWALQAPTARPGITVDWMHGLPGVGKSRRAHERLPDAYIKDPRTKWWNGYFGEKEVIIDDFGPQGIDINHLLRWFDRYKCTVEYKGGMMPLMAETFIVTSNYHPREVFQTGRSTDQQDNTMYDHPQLPALMRRINIIHMQYIIEYISRCMDACNEASEIVKEIIKKIMRRVPAPGAEIA	unclassified	CRESS2(circolike)|und(circolike)	0.23
KT862257	Porcine faeces associated circular DNA molecule-1 isolat 23_Fec22_cow	MTPTPKKAYCFTLNNYTDAEVARVHGTCRDLSQFAIFGYEVGEQGTPHLQGYIRFAKSYRFATIKDRLLPRCHIEVANGSARQNREYCSKSGRFEEFGSCPDEPERKTRDELAREFVREAGDGRRGVRRFAESNPGTFYYSGAQLLRNYLSIQPAEPRPEVRVRWFHGLPGVGKSRRAHEELPEAYVKEPRTKWWNNYFGEKDVIIDDFGPLGIDINHLLRWFDRYKCFVEYKGGMLPLVADNFIVTSNFHPYDVFKDKEGVPHPQTEALLRRVVITLME	unclassified	CRESS2(circolike)|und(circolike)	0.23
KP153474	Lake Sarah-associated circular virus-36	MPTPKKSYCFTLNNYTDGELELLRVVCSEEASYAVIGREVGETGTPHLQGYIRFKKAYRFSTIKDRYLLRCHIEVAAGDADSNFRYCSKDGDFAEFGERPTSGKSASRADLARSFVSYMDDGRSGMVRFAHENPGTWYFSGATMLRNYYALQPAVDRSDVSVTWIFGDPGVGKSRKAHETLPQAYVKDPRTKWWNEYALEKDVIIDDFGPGGIDINHLLRWFDRYKCLVESKGGMIPLYAVNFIVTSNFHPEKVFSFAGDPNVQLPALMRRMIIKEMV	unclassified	CRESS2(circolike)|und(circolike)	0.23
KP153470	Lake Sarah-associated circular virus-34	MARKCWCFTLNNYTDDEYSAIIGRLPDLSRYYVVGVEVGDSGTKHLQGYASFRVAKRLNAVKDILSNRAHCEAARGSAGQNRKYCTKDGDFVEGGEVPKTTDKVTRNDLAKQFREAFAGGMSGVASFADEQPGTWFFSGHNLLRNTLTLMAPEPRPDISVRWIYGPPGVGKSRKAHEELPDAYIKEPRTKWWNGYYGEKTCILDDFGPGGIDINHLLRWFDRYKCLVENKGGMVPLLVSTFIVTSNFHPNQIFKFGEETHPQLPALERRITLEEME	unclassified	CRESS2(circolike)|und(circolike)	0.22
KT862235	Llama faeces associated circular DNA virus-1	MPSNPQFFHFCFTLNNYVEEVLDDVEEEDVPRISAFCEEEGKYWIIGREVGESGTPHLQGYVSLRKRRTFVYVRDKLSNRCHIESSRGTARQNREYCSKGGNFIEGGSINEGRVRQDRDEAARSFMAAVRRGDQGLVEFADAEPHTWIRHGSNMLRNALSILPPIERPSISVRWIWGSPGVGKSRIAHETLPDAYVKDPRTKWWNGYLCQEDVIIDDFGPNGIDINHLLRWFDRYKCLVENKGGMVALHATNFIVTSNFHPRDIFKFGDEINPQLPALERRIVIEEML	unclassified	CRESS2(circolike)|und(circolike)	0.11
KP153407	Lake Sarah-associated circular virus-9	MSRQLRHFCFTLNNYVEEEDIPRLQGFFEQEAKYWIIGREVGDSGTPHLQGYASLQRRHTFNVVRDKLGSRCHIEGARGSARQNREYCSKGGNYIEGGSINEGAASGKSRDELGRSFMAAVELGNSGVVEYANSFPGAYIFSGSNMLRNALALKPPIERPNIKVQWIYGEPGVGKSRLAHSSLPEAYVKEPRTKWWNGYMCEKNVIIDDFGPNGIDINHLLRWFDRYKCLVENKGGMIALYADNFIITSNFHPDEVFSFAGVPNVQLPALMRRIELVHMN	unclassified	CRESS2(circolike)|und(circolike)	0.16
KJ641730	Bat circovirus isolate BtMl-CV/QH2013	MPSPNQSFHWCFTLNNYVEEDFSTIKAWAEEEAKYWIIGRETGESGTPHLQGYVSLRRRRVFPYVSGKLSSRAHITRAAGTARQNRRYCSKDGNFEEGGEINEGRRKPKDKDEQAREFVVALEQGDRGILEFSNSEPGAWIFNGSNMLRNALQLYATVERPNINVRWIWGPPGVGKSRLAHGNLPDAYVKDPRTKWWNGYLCQKEVIIDDFGPNGIDINHLLRWFDRYKCAVETKGGMVALYATTFIVTSNFEPCDVFTHDGIVNAQLPALLRRIVVEHMM	unclassified	CRESS2(circolike)|und(circolike)	0.2
JX904561	Uncultured marine virus clone SI03705	MTPPPQSRSWVFTLNNPTEDERGWYEEWVAEGHATYVVCGEETGDAGTPHLQGFVQWTARRRMAYCKVRYPRAHWEVSRARDPAKARDYCQKDGVFAEYGIMAEGGHDNIGLARKRCYDAFKVGGAAAAEEAEPLVYAYQGHNLAKNVVRPAPHRPDITARWLFGPSGSGKTRKAWARWAEEDSADPAPYAKISTVKWWNGYRGEKTVIIDDLTKGGLGLHHLLTWCDRYPTQVETKGGMEPLYATEFIITSNYTPEEVFPDAGAESVVALRRRFTFEHITLD	unclassified	CRESS2(circolike)|und(circolike)	0.21
KT732823	Pacific flying fox faeces associated circular DNA virus-6 isolat Tbat_H_77994	MSRDKVDLAPSRGFSKYWCFTAFASDFEKFTEIISDERVFSNSDLSYIIGGEELCPLSGRKHIQGFAAFASRKRLTACKKLFPSAHFERMRGSAREAIEYCKKDGKFVERGIYPCVRSSTVDNGSAKGVDRIKDFIELARAGNVDLCEQRHPNQFLRYFSQLKNLRKFDIERLSEALWRLDLRGPSFGIGKDASRSPSLRVFFFKKSQLKWWDGYNNENIILISDFDESCKWMVHYLKIWADVYPFNAEVKGSTIKIRPKYIIVTSNFRMDMLFLGTALDALKRRFMTFEFSGSGLVEKQLRNESHFNAFVLDALKPYVDEDVDASPSPSSSVLPNGGEISPFTDEETSTCLPSTSCAVDNP	CRESS2	-	0.43
KM598396	Odonata-associated circular virus-13 isolat OdasCV-13-US-1591LM1-12	MGSNVLRAKNGSSGPRRKYKLYCFTSFAVDQEPSYDPTAMQYLIYGRETCPDSGRTHLQGFVAFKNRQYFTACKKYFGTAHVEACKGTFAENQEYCKKDGDYKEFGTAPEIKSGGDVFNDVLRKAEAGSIQEIKDLYPGLYIRYKKTLESIKRFNAEQLEESCGIWLTGPPRSGKDYAVSTFFSSIYSKMLNKWFDGYEGEECVHLSDMDKNHVYMGSFLKIWCDRYPFRAEIKGGTMVIRPKYIVVTSNYKLEDIFDGSMLSALQARFMVMCYDPVDGVVVTPRPVFQPSDRFIQALQHAIPKGEDVPDMAPKAGPSNALQEAEFSSSDEFKESQVPKRKKKL	CRESS2	-	0.35
JX185415	Dragonfly circularisvirus isolate TO-DF3E-2010	MSRCKNWCFTSFNVDSPPKFDPITTEYLCYGRETCPTTKKSHLQGFICLKERKRLAGVKKLLGSVHLEASRGTVDQNIQYCSKDGEFTEFGSRPSSGPATSPFALAIAAATDGRLDDVKSTHPGIYLRYKKTLESLQKFRSDDLDGSCGVWICGPPRIGKDYAVRKIGNVYCKALNKWWDGYLGEPNVLISDVEPDHFKWIGYFLKIWSDRYPFIAEIKGSSMKIRPEKIFVTSNFRLSDCCNGEILGALQSRFTIYDMFDNVVRKRPVVAASTCVFDLLVENGDACLEKENVPPAVQEAVATTSKQPTRAEEEELQDFQVVKKKPRKAKSS	CRESS2	-	0.32
KM573773	Dromedary stool-associated circular ssDNA virus isolat DcSCV_c1009	MSNRGTRWCFTINNPTEADVHNVEHLSEQDWVKSAIAEFEHLNEGTPHIQGFMILNEKKYLSWLKNAYFGPRIHLEVARGTSKQAWDYCTKEGNIIIEYNKPDTVDRTPHRRGDELARNILRDIGELDEEDFKEQYPSFYLRNKPIYDQHRISYLQRTAIAYNSELHDKNLWLYGPTGTGKTTFALSGLPVYQIYSKPATNKWFDGFDPARHKRVVLDDLPILQPGSNIPYYLKIWADHYGCTVEKKGSGTFLDARIPIIVTSNFSIDEAIPNEIDRQAIKRRFREVYWDGHNIEMYSECPSFGHYLGQVSPAHRPQPAQIPQRPVTPQSAQYSEYQSDNEDSIVEEDNPFDTPLNTPIRPNTPIRPNTPTRPDSIPSAYEISPLERRMMELRKQRKEA…	unclassified	und|CRESS2(circolike)	0.31
JF713718	Po-Circo-like virus 41	MSRIRGTRWCFTINNFTQEEEELVMNMPSTGWVKSMIAEEEHLFEGTPHIQGYFTTTKRTDFTALTKFFNGRAHLEQAKGSTRDNWNYCSKEGNVIVEFNRPSTVDRVPHRAHEDPKDEWADLMIQDCEQMDRETFRSEHPNFFLNQRDKYERIHNEYLARTTTVFDGRLHDKNIWIYGPPGSGKSTLARSDTPIDHIYFKPVDKWWDGFDPSKHNRIVMDDYPNEATGGAIFTQRMKIWGDRTTEPRPVKGGTITVDPNIPFIVTSNFPIDECFSNDVDREAIHRRFQEIYLDGDKSKLDRFMHLKNLINPEDPLDCDDSIVSD	unclassified	und|CRESS2(circolike)	0.24
JF713719	Po-Circo-like virus 51	MSSKRVIATRWVFTINNFTQEDEEAVINLPDQDWCKSVIAEEEHLEDGTPHIQGYMVTSRKDRSAISKYLNSHAYIEVARGSSYDNWEYCSKEDQIIVEYNKPSQADNKPHRSLTRNQEETLSFLESCKTFTRDQMIEQYPCLYARHYQLYEKLHSEYAIRSIDTYDGRLHDKNLWIYGPAGSGKTTLALSDIEHYKVYLKPINKWWDGFNPNYHERILIDDFPEGATASILAPFVKHWGDRFPYNAEVKNGSTVINPSIPVIITSNYSIDETFDRQQDRDAVRRRFQEIYLDGSQSHLPYYCHLDLLYSRIRSGEINKE	unclassified	und|CRESS2(circolike)	0.16
JF713716	Po-Circo-like virus 21	MQRVRAIRWCFTINNFTYEEEEAVRNLELNPEVDAVIAEEEHLDEGTPHIQGYLRLKTKKDMTVIQRWLGGRAHLEVAMGSEMDNIKYCTKEDQVIVEKLNDKLTKELKCKDKDEEAREMIADMRSLNESEFEAKYPKFYMYHQALYRQFRHEALVKQQETWNGELKQKNLWIWGPPGKGKSRAARIGLRQYEIFSKAYNKWWNGFIQEDTKRVVIDDWPSLEAGGNMLVQHLKIWADRYPFTAETKGGHLAVEPSYQLIITSNFSIDQCFGNPEDQEAIHRRFTEIHWTNMPGTLDPFTALTLYPQMDE	unclassified	und|CRESS2(circolike)	0.18
KR902498	Kirkovirus Equ1	MNTRSRSFVFTINNFTQEEEELIMNLENDPQVVDIVAEEEHLEEGTPHIQGFIKFANQRYRNSICRFLGGRAFVEVARGSLEANINYCSKEDHLIVKKITSAVNKAYDKSRSADEKAKNIINAAKSLNESDFSTTFPNFYLFHRDIYQRFNMEENLKKLKTWDGELRTKNLWIYGPAGVGKSTLARKSLEPFEIYSKAFNKWWNGFEPSCHQRVVLDDYPSSPQGDTLVQHMKIWGDRYVFIGEIKGGHSTIEPNFQFVITSNFSIDECFTKEQDRDAIRRRFREIYLDSRKENLDEWLASVLLE	unclassified	und|CRESS2(circolike)	0.22
KM598397	Odonata-associated circular virus-14 isolat OdasCV-14-US-1577SC3-12	MSQSQQSRRWFITINNYTSADIDALREIECNYIVACTEIAPTTGTPHVHALVIFNTNKRFFAVKRLVARADIEIVKGTFNQAYDYVTKDGRIILEEGDKPKEKHNVECTFKAMVQAAKDGTIDKECLMYCRYEKFFSRFEKREEFCYDGELSCKNAWIYGPPGTGKSRLVREYARSRGYRIYEKLSNKWWDNYDGEEVVLMEDLDPKVCEVLIHHIKLWADRYPFRAEVKGGSKRLLPKFQLIVTSHYSLSECFTGPDGSAICRRFDEWEMN	unclassified	und|CRESS2(circolike)	0.4
KM598392	Odonata-associated circular virus-9	MIFKKKIYFSNKIKMSSRNYVLTIYDFNLLPKLQDSAIRYSAYTDEICPTTGRPHKQAYIVLYKKQRPSFVRKLFPNTYNHIMNGTLEQNDIYISKKNTQQIHEYGDKPMTQEEKGEEGAAYWREQLELAKKDPSLCDPKLQIIHHRNLEAIHEKAKRVKLSDLDKLDNWWYIGCTGTGKSRTARQLYPDAYIKQCNKWWNDYDGEETVIIDDLNPDHKFMANFIDQWCDHYPFPAEFKGGQKTIRPKRFIITTRYTIEEILGENNFSQIESWKRRFQIKEF	unclassified	und(circolike)|CRESS2(circolike)	0.28
JQ085285	Meles meles circovirus-like virus	MATRPEALHWCFTLNNPTIDEQQIIDELEEFGIEYAVFQLEEGENNTPHFQGYVALTVKKRLTAVRTLFGGVAHWEICRGTPTQNRDYCTKADTRIGDFVEIGTLPAPKGARQDLVQLHSALKDGLTQAQYVDQFFSIFVRHPNLVSNYVAATISERDPANPVSTWLLIGTPGTGKSRLARAIGKNLGDGAIFEHSLGKWFDGYVGQRTVLFDDFCGSSLPFSQFKRICDRYPVRVELKGLSCPMAATNFLITTNQDPKTWWKDEVTGQHGHAAITRRIGRVLFFFAENTFRSYPSYNHYATDCLRPRIDGETYHYFSPAQTIVYDAQGEAILPPEILRAEVQ	unclassified	und|und(circolike)	0.39
KP202150	Apteryx rowi circovirus-like virus isolate JWNM 090913	MSKARHWCFTLNNPDDEPDLSDTNIQYAIYQMEIAPHTDTPHFQGYIILFKKQRLAWVRAVLPRAHWEIARGTPSQNRDYCTKPDTRIGEPSELGLFPEDAGQGSRTDLQAVHFALQHGLTNKEYANQYFSTWIRYPNLIDTFAQSNIVPRTGDEEIECILIIGPPGTGKSRYAERLARSYNVGEFFRKQRGKWYDGYLGERVIIFDDFRGSSLSFTDFKLLVDRYALRVEVKGRYVNMAATKFIITTNLSPDAWWGEEVTGPEFPAISRRITEVLFFPELNSFCRFDSYEAYLEYLRPQLILPHGLLPQAQAQYAFQEVIY	unclassified	und|und(circolike)	0.3
KT732828	Pacific flying fox faeces associated circular DNA virus-11 isolat Tbat_H_102636	MSKPSRNFCFTLNNPDDEYTFFADRFPRFQTQYAIWQLEAGENGTRDLQGYLELSSPARVSAFQSTTLKGAHFEPRKGTRAQARDYCRKLDTRVDGPWEYGTFGAGGQGRRSDLEAVEQSIKRGASLAEIAEEHTTSFIKYARNISLTCEILCPTTPRNPETPCEVHLYHGPSGCGKTRAITADSLLQGSSVYWKDNGKWWDGYRGHTIVVADDFSGASMRYCDFRRWFDRYPCRVERKGDTTELVATRFYISSTKLPDLWWDRSVVKEYNWMEIARRITHFHTFDEETKHLHSYTGTDQATALDQYCDSINYYHY	unclassified	und|und(circolike)	0.17
JF755403	Rodent stool-associated circular genome virus	MTRARNWCGTLNAIPDGFDGEKWFADLDGKVAYAVGQLEMGHETGHLHLQMYVQCGQTRRLAWLKANVSADAHWEPAKGSPAQARAYCMKEDTRAAGPWEYGEWATQGQTRGLSQAVGRLQEGATLRQIAEEFPEVFVRHSRGLRDWIHTVGNKGPRQIGEDGPEVWVFWGPSGTGKSRRARDDWPDAYWKLNNARWWDGYAGHETVIFDDFKGSSLTLHDFQRIIDRYPLDVEVKGGTTPLSATRYVFTSNKHPADWYSAEADPEETVMRRINEFCADRGRLIHFVGAPGAAAHREAAPEPPEGPPGIESFVGLDPVHLF	unclassified	und|und(circolike)	0.22
JF755413	Rodent stool-associated circular genome virus	MCVRIKMTQATWWLGTKFVHEAHDTEEWMRDLAESGKVKFITGQRELCPETMRHHVQFVVNLHRSQRLSYLKKIDGEAHWESVRGTPKQARDYCTKEDTRFDGPWEFGKCLEPGQRRGYDEAVAAVCSGRCLAEVASEYPQVWVKYGRGLVDLRKQLRLDSDRRQFDDNGPELWIFWGPSGTGKSKRANETWPDAYWKIPGEKWWDGYTNQDTVILDDFKGSFMRLTDFQRLIDRYPLWVEVKGGSIPMLATRYVITSNEAPEAWYASADPHGTVTRRCNDFTDGGRRIIYIGPERQELPDFESWVGWGEFAR	unclassified	und|und(circolike)	0.27
KJ641725	Bat circovirus isolate BtRf-CV-1/NM2013	MPSKFCFAVNNPELLLDPSIWPLFVAYVCYQLEVGENGTPHFQGYLQLKQTRSLAQLKRWPGLETAHFEVQRGTNDQARDYCRKESSRMEGPWEYGTFVTGPGARTDLLQVKKMLDDKASDKEIADLHFGSWCRYNRSFNTYRTLSMKHRTQKPKVIVAFGQPGLGKTYSMTHMFGVDDLFPKDRLSGNWWDGYFGQKLVLLDEFSGWMVPQDLNRLCDECPLSGQVKGGFVPLAPLVVGITTNYPPWLWWKPEVSSISLPAFCRRVDVWQLWTEFGCHSDFDNYYDFKVTACLFMDFLEREKK	unclassified	und|und	0.25
JX904523	Uncultured marine virus clone SI01813	MEPNRQQSKHWCFTCNNPTADLTFNAATVAYAVWQKEMSASGTPHYQGYLQTNKVVRLTGVKKILHNAGHGTAHLEVKRGTVQQAIDYCRKEDTRVAGPYEFGELPITKQGERTDLNTLRTAVKAKRKWTDIADDDDLNPLLAKFHRYARWIRQEYELETQPKWRNVQVEVLWGPTGCGKTRKAMDEGAFKWNPCTPEWWDGYRGEEILLIDEFYGQIKPSRLLQLLDGHPCLLPIKGAATYAVWTKVYITSNSDPDSWYSDIPPAVKAALQRRITKTTQMGTEPSFDFAANRDGNGTWGKF	unclassified	und|CRESS1	0.18
JX904192	Uncultured marine virus clone GOM00012	MSSVEYPEGLAKGTSSKSRARHWIGTWFTIPSLDEFSSMCASNSITTWSAQVEKSPSSGRKHLQFYVRFPKAVRFTKLQQMFPGAHLEVCKDPSACQKYCIKDRTRDGWSHSEGELITSGKRTDLDVACDLVTSRGVSEAALELPSTYVKYHKGLKAYSRELAKEEFPLMKFRDVEVIVLYGTTGSGKTRRAVEESKGDIYPLVSYDPLWFDGYSGQKNLLLDEFYGQLKPYKLLQILDGYYRDWPVKGDYVRGIWDRVYITSNTPPDEWYRTIPAEVYRALMRRVTHVEQVGSRVEEQPLPLNGDDIYSAFVDECFTPCDSDRS	unclassified	und|CRESS1	0.23
KF133828	Circoviridae 21 LDMD-2013	MPRTRTTTPETNMRRNWCITVNNPVEDPETWSKRLRTHSLFKYLVFQAEKGDSGTIHYQAYAEFSNPIRFGSVKYLIPGAHIEARRGSAKQASDYCKKEKGRKAGPWEYGELSVERQGQRLDLERLAQIAQTHSHTDILKEMPREYAKYYKFVQHVKHIEAMDKPGIRSNLQVIVCHGETRTGKTHYAYERDPNLYALPVGKDLWFDNYNGEKTVLLDDFSGQCRLVDLLRILDKYPVQIPRKGGFVWLKAETIIITCNQHPETWYDYSNRDSLRKALMARFTRFLEFTAGGRKAIQLGGDHTRPANEIVEARRDSTTPIPETPPQSPVRRDSDVSLTPTIELSTIEDDYIVIDD	unclassified	und|und	0.31
KM874302	Avon-Heathcote Estuary associated circular virus 5 isolat AHEaCV-5-NZ-3091C3-2012	MAANQKFKNVCFTLNNPGEDPIPFDVEKMHYLVYQREVGANGTEHYQGYCELINQTRFNAVKALLGGGSVHIERRKGSAQEAAAYCKKDDTRAPGASIQEFGEMHACTPGKRNDLKAFVDDVRSGTKRKRDLVEDHAGVLARYPKFYETLTLMARPVRTEELQVILHIGPTGLGKTRTVMDLYAADPGLYVTPLSNGTPWYDHYDGHHTVLLDDFSGRSSHMSLVTLLRLLDRYPVMVPTKGAHTWWCPNTIYVTTNILPSLWYEWGTRGEHYRALARRFTKVVLFYEKLHADDPGMVEQDANWWKENCPPEAALLYSQ	unclassified	und|und	0.28
FJ959077	Circovirus-like genome RW-A	MTSPQGKYWCFTHNNPLVDGDTFLSSLKAYFPKLTYIVFQLERITTPHFQGYMEFSTLVRLSALKRFHPGIHWERRRGSQQDAIDYCSRETYKGEDKGRVDGPWEWGTRAETHQGQRSDLASAIEALRDGGIRRVAEENPEALVRYSRGIQFLASLTPPPKDPPEVYLLFGPTGVGKTKRFFDSEPDGWASPVTDGLWFDGYMGQDAALFDDFCGKYTKLGMAQFLRVIDRYRVQLATKGGFTWFNPKRIYVTSNFHPLDWWDWSGRQQQYPALERRFTHVYWWKRPGLLVSLRRPDPEASQDVLDGIDNDDQWRHFWDGVGRAQLALDIATGRLVSNAPEDYFNF	unclassified	und|und	0.33
KT149396	Circovirus-like genome DCCV-3	MNRTRGYCFTINNYNDDELLSTQKLLETATYGIYGIEIGNSGTQHIQGYGYWANKISFSTIKETLPRAHIECAKGDAGENQRYCSKDGNYTEYGILPQRGRRNDIVAFKDDILAGMNEEDLIEKHTGCFARYDRFYQRCRNIVLKKIAKEMIQPEVIVITGEPGVGKTHTIYEENNIEDIYKVEVGDGSSGSVFWDNYNGENTILIDDFHSNLKLDYMLRLCDKYPMKLNIKGGHTWKCAKKIYITSNIKLDNWYPNCPDIHKRALKRRITKYINLEMESPNQRIQHNMLNQPERQILDQPMHLALLLAEMP	unclassified	und(circolike)|und(circolike)	0.29
KP153362	Lake Sarah-associated circular molecule 3 isolat LSaCM-3-LSCO-2013	MYTNPNSYFDLTLPQRRFMFTSYTLEGEGFTVPDQDPRFRYCVYQAEKCPQTGNIHLQGYIEFKDQIRGNTVQKLMNVPGLHLSRVDYPEKARAYCMKLDTRYAEPQEYGKYKKEQGARNDLKAMGDMVLAGATHIQIYDAYPGQYIRYYKAIDRLRQIYALDKPNRLKIGRMECILFYGRPGTGKTTQAKEYAAHIKQAYWEIPIANSGTLWFDGYNAEPCVIIDDFSGKINLDAALRIFDQGEVQVPVKGGHVWWCPKTIIITSNVHPSNWYDYQNRQDSMIAMYRRLHRIVCFNRATPAEVDRFKFLDIPENAFDVIMETDQ	unclassified	und|und	0.27
KT732820	Pacific flying fox faeces associated circular DNA virus-1 isolat Tbat_A_1180	MQLSRWCFTNFNTPQDLAAGCDAPLTLPSERLEYACYQIERCPDTARLHAQGSPHFKRSIKLGALKKLPGFEAAHFEGAKADLQANRNYCTKEDSRVAGPFEIGSTEGLGPGARSDLLAVKRRLDEGVDEVGLADEFFGEWVKHRASFNVYRGLKVPARGKDTQTPLYVCVGASGLGKSTFVYDETEGTVFQKALTAKWWDGFNGTQPVLFDDFRGAFQFTELLRLANIGAYQVEVKGGSIQFNPKEIWITSNLRPDQWYNPSTIKDITPLTRRISKIYHFTAFKEMRLFQSTENESAWDQYSRSEEFSTLNFNGRHGEATSDLELVY	unclassified	und|und	0.2
KT862232	Deer faeces associated circular DNA virus 1 isolat 26_Fec35810_deer	MRSRTYCYTSFKESEPFVDINQIVFQIHQLEICETTGRPHWQGIVAFPNAKAPVGVKQYLCDTSAHIEYTKNIPASIAYCTKEETRVDGPFSYGTVPDLEPDNWWQQLSDVQLWTEHSKWMLRNYNGVAAFRKSIKCVYAPRATPTVILLFGETGSGKSRAARELAGDELYPKPMGAWWDGYRGHRVVLFDDFYGNEQYSDLLRWLSELPISVPYKGGFTPLLADRFFFTSNAHPRDWYPNIPDKSALWRRVTKIYECFLDRFLICDKKSTLI	unclassified	CRESS1|und(circolike)	0.16
KT732827	Pacific flying fox faeces associated circular DNA virus-10 isolat Tbat_A_16877	MSRVRVWVWTSFKDSLDLNDGGIEYSVYQQEQCPTTGRLHWQGVTRFKNARQLGGVKRWLGDPQAHCEPCKKEHEAIKYCQKEETRIGQATILGHIQETLEPGWWQKLTINQLWEQHPEWMLKHYNGVQAYRRSLNKSQTERQNIKVFVFYGTPGTGKSYSARQFKPYFAKASGNWWDGYCGEETVIFDDFYGANEKYTDILRWCSELPISVPIKGSMVPLEATTFIFTSNSHPSLWWPGLLDKSAFQRRVTRIYQCFIEKFVKQVW	unclassified	CRESS1|und(circolike)	0.15
KC543331	Acheta domesticus volvovirus isolate IAF	MRFRHWIGTSFNLESIPDDESTIKQIAYQRERCPETNRLHLQFCISFTNPRTMDGVKRYIGDQSAHLEPCRNLRKGLEYCNKSESFVDNRFSRFNTDAQDAPDDFREFTELQLWQKYPNWMLKHGTQVRRYYQICQEVPQTREKPVCYIFWGPAGTGKSYSARHWLGDQLYIKPPGNFWIGYNGEKAVLFDDYYSSEKYDDLLRWISENPIHVSIKGSSTPLKAIKFAFTSNMNPRSWHSKIEDHSALFRRITKCFFCTDKCFSLDNLHE	unclassified	CRESS1|und(circolike)	0.07
KT149404	Circovirus-like genome DCCV-11	MSSRRWVYTLFAAAEDDYSNLDDFERRLRDHQAFRGLCHQLECCPTTSKVHLQGYVEFEKPQRMAALKKLNSTVHLETAKGTREHCVRYCTKDETRVPESSPTVDPVLLGTTTQGRRNDLLETTLAIVNGELSRDDVFDTRPDLICKYARGINELLTYRAKKERQGDRELHTEVLWGDAGVGKTRYAYGRSTPEDVYILCKGNGGALWWDGYDGQSILVIDDFYGWVEHSVLLRILDRYPFKIDIKGSSTYANWKEVYITSNRHPSTWYTRAFPWTEDKALQRRLGAIYECKATMFGSTWKCEKSLKVRTVDRDFNIEELDNLL	unclassified	-	0.38
FJ959078	Circovirus-like genome RW-B	MDVDTTPVSRRGRPSSSSSSSSTGERFTARTFCVTVNNRDEVEQNWPNAVQEPSEEFVERVRYVVWQRELAPETGRVHIQAYVELYMAAGIVMLKRLFNCPTMHVEKRRGTQDQARNYCMKEDTRDGPDGGPFEYGTYSKTPGNGQGKRNDLTDAVEALEAGGVEAVVSKHPNTYVRYHRGIHALYQAKLEAIASRQQRNVKTAVFYGEPGTGKTHCAFELARITGEEIYILNAPAGRNQSVWFNGYQNQKILVVDEMNGDWIGWQLLLRMTDKYPLQCQTKGGMVWAMWEIVIFTSNAHWEDWYPYYAGGMDKAALKRRIHKVVKFYGSEASGNFTKKYYDPDLPEANWTVATTDVIATFLRNGTVRPHTDEELEEVEDVVMNTQQESQGTQTTELVE…	unclassified	-	0.33
KP153497	Lake Sarah-associated circular virus-42	MSRGKSWCFTIHSRGEGDDCDWLLHPIGTAEPPSAFWDDDPFEWGCQFMIFQMERCPETGKLHLQGALQLDKQQRLSFMKKLHKTAHWEVMKGNWTQSIEYCSKSETKVNGPWEAGDRPKMGQRTDLETIGKMVKENKTNLELVDTLGAGVSKFQKHISFLRFTYSEKDSDRQATGVKVIVLYGPTGTGKTYAAVNSLTGGRAYHILNAPSQKATKLWFDGYENQKVLVIDDFDGSVEFRYLLRMIDVYKFPAEVKGGMVWGVWDTVIITSNVHPASWYTGVDTSPLKRRIAEIRLCENQGTYKMISWEETVLSNDFENF	unclassified	-	0.22
KF133807	Circoviridae 1 LDMD-2013	MKLRYKNKRGVKTCRFCCFTINNPTQEELEELLLEKQKASYLVYQFEVGKNGTRHVQGYIEFTSPKRFTTLKRSVAFARAHLERRGGTAKQAAEYCXKKDTREEGTEFVELGKISEQGKRNDLAAVKRMLDSGASQKEIADAYFGQYVRYHRSFGDYLNLTPPPIREVEVIILYGAPGTGKSRWAYSTYPDLWSKPPGPWFDTYAGQETILIDEMAGDYIDYRTLLRVTEGLPLLCPVKGTFTHLRHSRVVICSNFHPAQWYDMTRYEDAGYTTFEASPLYRRINCLVELKLVRCENRYVRRWHIGCPDTFPLSAYKRQAGGVPPMPDENADGVPFPPKSKGRKIFGQPMDRSDIXKK	unclassified	und|und	0.38
KM874322	Avon-Heathcote Estuary associated circular virus 10 isolat AHEaCV-10-NZ-2599SG-2012	MPVTQPVTKATRAICFTEFKKLTNWDDVKSQLRYYAYAEETCPKTGKKHYQGFAYSWKPIRFSGWKKMFPTAHIEQMRGNFRENTAYCSKEGSLIEFGEKPNENGVQGTAIEYKRRIEEGQSTMEIAEDENLFGQYLHSYSALEKYEQHIRGKKIKLDETPPEVYIRWGAAGTGKTHGVFKRYGRDKVCIVPDNTGKWFDNCHNSDVMLFDDVEIDAVPPISQFLRLTDRYPMQVPVKGGFIWWKPKVIVFTSNLPWEQWWNTLNTEHKRAVQRRLTRVTRIYKDHEKVEYENANYELLSQTQGFFASPPQLQQEVQEEPVHSQEEGEQVHEESGSASEEHSAV	unclassified	und(circolike)|und	0.21
KT945162	Ctenophore-associated circular virus 1	MATSETSETSGGPPPSGTFRAICFTEFGDPPDWDVVQHKLRFMAYGLETCPTTQREHYQGFAYAHKPMRWKAWKKLFPRAHFEKMAGSFQDNVVYCSKQSSLIKFGEEPKQGERKDLIDLKRKLEEYAPRRGTTTYDVAEDEAYFGVVARHNTFASGYLRHKRAKILNGDRTMPKVYVRIGPPGTGKTRWLDRKFGVGGYVIAPDNTGKWFDGCDHDVILFDDVEIDQVPPLSLWKRLCDRYPFEVPVKGGFITWKPRVIVFTSNHAVHEWWKDITPDNQQAIARRIYKTVYVDGTDGDETQEEFQSDEDSEGAEEGRA	unclassified	und(circolike)|und	0.2
KT945164	Ctenophore-associated circular virus 3	MPGYQFRSATFTQFNVEKAPELGNLQYIAFGLETCPSTQRQHWQGFAYSYTKMTHKKWRETFPGAHIEEMKGNFRQNEVYCSKEGTYTEFGIKPMENGKKRSLAEMKEQLDNGEKPVEVATKSDKMFGTFLQYRSGLNEYAQYIREKKLKLNRDVPDVYVRIGPSGTGKTRWLDDTFGLDGWTFAPDNTGHWFDGCDCDVICFDEVEAGAIPSLSTWKILCDRYGKRVPVKGGFIYWKPKVIVFTSNQPISKWWPNLTEFDLIAIERRCKEIVVVE	unclassified	und(circolike)|und	0.21
KM874344	Avon-Heathcote Estuary associated circular virus 18 isolat AHEaCV-17-NZ-2032GA-2012	MPETIRNAVLTNFNDPMIWEDLSPKLRYFAYGEEICPETKREHFQCFAQAWKPMRLTGWKKLFPTAHIEIMRGNFRENEAYCSKEGKLTEYGEKPNENGKKSTLINYKRKIDEGDSVLGIAEMEDYFPTYVMYRNGLHEYKRHVRSKKVQNDRTMPEVYVRIGPAGTGKTRWMDEKFGLDGWIQAPDNTGKWFDGCDRDVILFDDVEAGQIPPLSSWKRLCDRYPLQVPIKGGFITWKPKTIVFTSNTHPKLWWPNLSEFDVGAIERRITEIVVVE	unclassified	und(circolike)|und	0.18
KR528550	Callinectes sapidus associated circular virus	MTIYREQSSAADWERLKDKLTYFAYAEETCPXTGRWHMQAYAYSRRAMRHSAWRKLFPKIHIEKMRGSFTDNENYCSKEGQLIEFGERPRQGERSDLQEFKFRLDRGDKPLDIAYEDVSMFNAVGRMHRFAETYSQYIRYRQIKDNRDAPEVYLRIGPAGTGKTKWLDDTYGTAGYTIAPDNLGRWFDKCDCDVVLFDDVEAGQVPPFSLWKRLCDRYPIQVPVKGGFIWWKPKVIVFTSNQAPSKWWGELDELNKGAFDRRVTSIEVVE	unclassified	und(circolike)|und	0.22
KJ547652	McMurdo Ice Shelf pond-associated circular DNA virus-7 isolat alg49-129	MPQPRMKDNEVKKVFNALVFTDFSLYKWTLEDLATHKIQYLAYGLETCPETKKQHHQGWLYASTDRKRSFMAWKKHFQLLGLDMHYEAMQGNFSQNTKYISKEGQLTELGVKPMGSGKKRTLLEYKKQIEAGAHVLDIAEEDEKFGTFLQYRSGLNAYADHQRFKRIRTSREKPEVYIRVGPPGTGKSRWLDETYGFDKWIEAPDNSGKWFDGCDLADIIVFNDVGPGSCPPLDIFKKLCDRYPFRGAVKGGFIWLKPKIIVFTSNSYWTEWFGPDLAPLDREAIERRITSTICVE	unclassified	und(circolike)|und	0.21
KM598407	Odonata-associated circular virus-3	MAELIRTENPKKRDRNWCFTINNWTPEEQDQLRTLVPADAEYIVWGREEGDAEHTPHLQGFVKTKNEVSMKKLKKLGFARAHLEIMGGTHAAAIAYCKKDGDWEEYGNQPLQGYRTDLVAFKHQIELGKRPLEVAEQDSHFGAYVKYHRGFDNYHAHIQESKRLRTGFKPPQVYLRVGDPGVGKSRHVYDTHGYEHVYTWESDMGNFFDGYRGQSVVHFEDVQKGQLPPLAKFKRLLDGHPVRVSVKGSSQIWSPDYIYISSNHKPCTWYDYKDGDYEAIMSRIKEARVVYKDRPDEVFHTSSRFDAWFQAQEDQ	unclassified	und(circolike)|und	0.2
KR528546	Didemnum sp. Sea Squirt associated virus isolate I0026A4	MENTTTKHETKPATNLPHKSWFLTLNNWTETEYKILQQLHGVTYSIIGKEGKETTPHLQGVVTFQKATRIAALKKILPRVHWEIPLNLDASRNYCMKEGDYEVTDHRHQGRRSDIAEAVGMVTDGKHMMEVAEAHPVTYVRNFRGLAALQGILERPRTWKTRVHVHWGPTGTGKTYNAHAQLKQLFPLERPYVWTPAMENWWDGYSGQSGVILDEFRGQLPFATLLNLLDEYEMIVPIKGGSRQWKPHVIFITSPLEPRSWYETGKAADSVEQLLRRIDIIEHMTEAYKISLDDIEQIYK	unclassified	und(circolike)|und	0.19
KF133823	Circoviridae 16 LDMD-2013	MPPKHQGFVFTENNYDLATENRIKAFPWAKYVLFGKETAPTTGTPHLQGFIWTHEPKTKQQVTRLAKLNFIGVPGSEKGPAYWEEYCSKQDVEPYRNQGKRTDLLDVKRKIDEGKPVMSMLSDDNHFGAFAQHQKFFQTYQAHKRRRTKYMKPEVVVYHGPTATNKSKRVHDTIEDFDEFFKWEPHMTNWFDGYVGQKVVLFEEFRGQLPFGEMLSLLDGYPNTRVPFKGGFADWSPEKIYLTSPLSPYEWYPNLAAKDSIDQLIRRINKIVNTASE	unclassified	und(circolike)|und	0.09
KT149402	Circovirus-like genome DCCV-9	MADTDETEFNYDESVEKYGKVKATNWVLTVFDEDGSRRQRLETLPDWAKCLAYGDEVTKRGRKHYQCYVTAWNPVRFSQFQPWIGKSWRSPMLGRLADSEDYCSKQSRLKIIGQKENQGRRTDLIGTKRRLDQLKPGESLMDVAREEPHFQQIMRCERSMQKYVENKRFRDMKGDYTKPELTWIVGAAGCGKTSLVYFMEPDIYDVPDFKWFDGYCGQEAVLFNNVTDSHCPKYVDFLRQVDRYSIQVPVKGGFVAWHPKRIYVTSLGLPARCWPYIGDLSEVNRRIDRYLGSGVNMLVDYTHLDTYTPYLWMLLSRTVDYLSPVHWCD	unclassified	und(circolike)|und	0.22
KP153370	Lake Sarah-associated circular molecule 7 isolat LSaCM-7-LSSO-2013	MPASSKSWCFTDNECLEDLWNIMESTYLCYGRETAPTTGQKHLQGVIVFATQKRLAAVKKLHPTCHWEAAHSVPASITYCKKEGDWFEFGTPPAQGKRNDLESVYALIKTGAKFAEVLDNHPVATIHYTQGIKQAIFAQIKHRPEQTPTVNWYFGATGAGKSHRAHAEAVNPYIFPNTGRFWEGYEGQTHVIFDDFRPDQVPFAKLLRILDKYNCTVEVKGASVPLAATHFWITAPESPQEMYTATNHTTGSTWEKENIQQLVRRCTVIERIIRDKHITNLIIEDPAGCPERGVTDIPPLKSQKKLDYPITDHMFLFDSSDEFNLC	unclassified	und(circolike)|und(circolike)	0.13
KF133813	Circoviridae 6 LDMD-2013	MSDVPAAPPSTVAAGRSRGWTGSMFDYDDVYESLCEALAAAVSEQRVTRAILGKEVCPTTQRKHLQWYVEFGNAVQRGSVTNLGITGHTEHRLGSPAQCWQYCSKDGDFATFGSPPKGQGKRSDLDQAIETLTSEGLEATAMEHPAAFVKYGRGLKLHHRPLADMEAPVVVVLWGPTGTGKSHTAFLEASAPYVWGPGMGQWFDGYDAETDVIFEEFNGQIPFRQFLRLLDKYPCQVQTKGGSKYWGARRIWITSPVHPSQWYASLEEKSEGSLAQLMRRLTDVRNLLIRHT	unclassified	und|und	0.15
KJ641732	Bat circovirus isolate BtRf-CV/SX2013	MHLSATLYKDVPTVTNHMMRDARYRHWLLTYNNPTESAEELIQLFDENGIQYTFQLESGESNTRHYQIYLRFNNPQRSSRLAGLLPRAHYEAARHPDSAELYCRKSESRIDGPWTNIRPGGTKRKSEYNDLLKTIQTTQKSTAELATEYFPLFCRNYSNIRRTISIIRPVEPRSWKTHVEWHWGKTGTGKSRYAYDTTVNKSVYWKNSTEWWDHYEGQEYVVIDDFRGEWPLKFLLNLFDRYPMKVQCKGYTAEFVSKTIIVTANYEPSHWYYFDEEGLRALLRRIDFIKEYK	unclassified	und|und(circolike)	0.28
JX904377	Uncultured marine virus clone GOM03193	MPRAPGIRSAPPQQRAWCFTLNNPGEWRPVFDDSMRLLVYQLERGDMGTPHLQGYVKYLERKTFAAVKTLWPSAHLEPAKASPMQNLAYCTKPEGRLDGPWKYGDWERAMGNQGERNDWHDIKAFLTEQLQLGVLTEDELFDEVIDRWPAKAREERAVRVHTEACKRRLMRSAIAVNPSAGERSPPQIVVLWGPTGSGKTRRAWEEAGPLAYSKPQGQWFDGYRGQANVILDEWPDETIGIQLVLQMLDRYPLMVAVKGSFASWCPRRVWLTSNIEPSAWFPEASQRHRDALRRRLRDFGTIINVTGSAAVDVDAAPQTPPRSAGPAAGAGYAARDPYLNDMWSPPGQAGRWVVELAASRPGSVYLSTDRQK	unclassified	und|und(circolike)	0.12
KT732832	Pacific flying fox faeces associated circular DNA virus-13 isolat Tbat_A_103819	MSVHGNRAWCFTLNNPTDEEKLLLPTSPESLPLWPRCTALVYQLEEGENGTPHIQGYARFDRQRTLATVKTILARAHWEPAKGSIQANLDYCGKQLGRLSEPVIIGFGGLRPGASGPSKPHLKRAQFVDLIASSPDVSIPELLDQGALEVLATQPNLLGTLRGFLFQDLRRDGVIVDLYYGLTGTGKSRLAFDEYPGAFRKTSGSWWDSYAGELSVVLDDFDDAFMPIGDLLRTLDRYPLRMPVKGGFIQLIANHFIITSNHLPSEWYPNAPPCRLAAVHRRFRNVVEFKDGYITTHLASNYFNVGATSLTPGLTTPLPWTVTDRPVTPTQPYMSPELTDSQLFATMD	unclassified	und|und(circolike)	0.36
KC248419	Diporeia sp. associated circular virus isolate OL3658	MPKVRKQSANATNDCWCFTLNNYTEDEEVRLKSIMLDPKNKTTYMVLGKEVGDSGTPHIQGYVTFQIRKKFDVVKKLLSPRVHLEPAVGTPQQASDYCKKDGTFWERGHLPEGKKQGRRNDIHEARDILQQGGTVLDVAEKDWMTFLKYRSSLSYYAAERMPGRIGKTQVIIFEGEPGCFKSYSAGCFKNSYPVVRPGNGQPIWFDGYQPEQHCAVLFDEFASWLPYHQLLELCDKYPCRVQVKGGTMQFKPIFAVFTANRPAEEWYPGMLWDALERRIDLRFWHSRAEAPNDHGGWGVGDVLIKRIKGQARHHPLFKYMQATAVDDVYKLDEEALRATFVTQPDDDIMDLVFEEAYMDVDTPGSQQSPLEVISSSEDELIDE	unclassified	CRESS3(circolike)|und	0.24
KT862256	Bovine faeces associated circular DNA molecule 1 isolat 5_Fec60361_cow	MPSQQAKVWTMTVKNWDLFDNQEWEERIQNQTEPDGSKIIRYLSIGKHTGQQTGYQHCHFNLELEKKKTMAWIKRELFNREDIHCEPRRGSREQCDSYLNKDGEFKVIINTRQIKPGRRTDLDDIHDMIKEGASLYDCYEEHFGTVVRCERGLRDYIALRDTILATKKKYPAPEVIVYVGPSGSGKSWHCSEDPDYEEGGYRFSIQMDSKIYFDGYNNQKTLWFDEFSGKTMPFTKFCQIADRYPGRYETKGGSVLIYGLKKILISTVEYPALWWSGSDRYNKDPEQLFRRITKCYYLGQPRIKEDGDIEYAIPLEFNPRHLRTQYDEEILKGNVKYPSDLMEEEPIATAEEAVKELKKLLEQSREEDEEQPIKRRRSRSRSREDDEDEAEDDYCELID…	CRESS1	-	0.37
KF246569	Fur seal faeces associated circular DNA virus	MPNPQVKMWALTVKNWDLFDHPEKLEEIGNYQDEDGQYLVRYLSIGKHTGEKTGYQHCHLNLELEKRQYMTWIKRVLFNIPDMHCEKRQGTREQCDTYLAKDGEFQVIVNRRRIERGHRSDLDEIHDMIKEGKDLFDVYESHFASTVRYSSGLEKYIVLHDSKRARNSETTAPQVIVYVGPAGSGKSWHCFNDEDYKESGYRFPIQMYEKVYFDGYNREKTIWFDEFNGRSMPFGKFCQLADRFPGIYETKGGSVLISGLKKILISTISYPATWWAGSNRFNLDPDQLYRRLTKCYYLGPPRRSSDGSIEYAIPLEFNPKELLTKEQEEILKRHVKYPSDYNPDDPILMIRDRLKCLL	CRESS1	-	0.33
KJ206566	Human circovirus VS6600022	MVYNSSGKYRKVFVTSFNTSAMEALNIQDLVDCDVARYVCMSMEHAPTTGRIHYHLYIEFYSQKTMNTIKKILKDATANIQPARGTPQEAVDYIKKDGATWKEAGTMSNQGHRSDLDDVFQRLQVGDNILDIIEGHPGTCIRYIKGILAVKGLVDQRRQRQEARQMPTVLVYIGKSGAGKSHACSQDPDYQRSGYKYPVQGPSKVYFDGYTGESTIWFDEFGGSVLPFHVFLRLADKYETRVETKGGSVCITGLQKILISTTTPPKLWWCESRKFNEDPYQLWRRLTRVYYIPRPSWGFADPVLIQHPENFDELVAAQLEREAETRGPSLDGESVRGQPGPVDPVHERDDDSDSERTIDTSDGEHSTTAA	CRESS1	-	0.24
KU043411	Unidentified circular ssDNA virus isolate cg1855	LTMNYETQRMRCATVTSFNIDYIKSTNWRDVINNSRLTYIVAGLEVCPETGKLHYQMYMEFEEKVTVKQIKRLLRDNGAHVEPRYGTAKEAIEYCKKDGNFMEFGKPKQQGERTDLADVYESLKVGRSLLDIIEEHPGTYIRYFRGIERVQDLFRRKQQKLEERVQPTVLVYIGKSGTGKSHHCYHDPDYQASGYKFPVQQAGKVYFDGYDGESTIWFDEFGGSVLPFGVFLRLCDKWETRVETKGASVCITNLRKILISTTTYPKNWWRDSRKYQEDPKQLWRRLTHVYYIPYLMLDYAEPIEIADPENFGDDVAEQLDRRAQEEERSQGRRDEEVAGAGGDRPSSPELIDLVGGSESDSDDAGLN	CRESS1	-	0.23
KT600066	Human feces pecovirus strain PeCV-NI	MSMRTRNWCVTSWTCPDYDSVERLVVSGEYKYVCVGKETCPRTGKVHWHWYLQAVNKKSMRQIKKDVGDRMAHAEAANGPADAGIAYVKKDGEWKEWGEPKKQGRRSDLEDCKKIIDNSVDDAMGTMQQIADTHFGDFVRYYRGFAKYADLVDIKRAKQREPHMPEVIVYLGRAGSGKSYHCYHDEGYQRSGYRYLVQMESKTYFDGYDGEKTIWFDEFSGRVMSFTVFTQIVDQWGSRVETKGGSRQIFPERFLISTVEWPSQWWAGSSRFNADPYQLYRRITKIYWCRGPGQEPVELKKDGWTCKNIDEYEELFGKLP	CRESS1	CRESS1|CRESS1	0.24
KU043424	Unidentified circular ssDNA virus isolate cg5269	MPARNSTGVSTGRPKRFRFACITAWNMDAFDLDWPQRMHDKGLSYVVIGRETCPRTGRHHLQCYFEAPNPKTVEQWQDVVCDKPRAHVECRAAWKPEGEEIAHNEGDRAADYCKKDGDFIEYGTLAPGQGARMDLADCKTMIDEGKQMIDLYEKHFGTCVRCHRGLMLYKDLVDRKRRKEAEPEPKEVVVYVGASGSGKSHHCWHDPDYRRNGYKYPLLAENKVWFDGYEGEEVLWIDEFRGSVFPFGLFLQVTDKWGARVEVKGGSVETFFKKILISTTVPPGEWYKCPNFLSNPQQLWRRLTKVYWLGPVEHDEEGFAIYPEPELIPDPEHDTRTNPYYDGVGTHYPRE	CRESS1	-	0.21
KM573766	Dromedary stool-associated circular ssDNA virus isolat DcSCV_c1054	MPANRSDRTRYSNWILTTWDPEAPYLKENWWEPQMDNLVQYVTVGHEHCHEGEQREHWHIYFELSGNHRKNMASIKEWLNDLTVHCEVRRGTGQQAIKYCQKGFDFWELGEPKRQGSRSDLVNCKQLLEEGVSMIELAQAHFGDFVRYYRGLYQYADLLSREKQRTAGLSEVEVTVFIGPAGSGKTYNCSKIKAEYEENGMGCYQFMQQQNGKCYFDGYEKQKCIWFDEFTGSTMQFNHWCRLADKYGVRVETKGGSVQISGLKRIIISTIIPPGEWWPNSQSFRDDPEQLWRRITEIYYCPKSTGTRRNKTYYKPMLIPEEDWERICRPYLENLDTLKVPIDD	CRESS1	-	0.26
JX904427	Uncultured marine virus clone SI00349	MESINSFFSSKNAQKCPEGNTETSGHNAGSNSRDRSWCFTSFKMDKTPLEKCADFDKVRWLIWAPEVCPKTKKQHWQCYVYLRDKASRRTLQRIFSGEKFHCDVALGSFDEQLNYIQGPYKKEDKEKPYNPDFQEYGKRPEQGKRKDLDQLRDSIISGEQTVDQICESNPVMFHQYGRTLNKLEEISLRRRFRTEMTKGIWYWGPTGTGKSHMAFQDYHPDTHYLCNHRDNGWWDGYAGQDTVIINEFRGNDIYTYDYILELVDKHPAKVNRRGREPLPFISKTVIITSSLHPADVFWRRNEKDSLEQLKRRFEIIKLDRRYEN	unclassified	CRESS1|und(circolike)	0.25
JX904394	Uncultured marine virus clone SI00003	MEVSSVSLKFDQKYPEGNTKPLGTNSRSRHWCFTSFADDEPSFKPSMKYLLYSPELCPTSGRKHWQGYCYYFDKKSMSASQKQLGGKHHHCIPLGDLDDQKSYIIGPYDKQGKVKPYNPDYKVFGNEPSQGQRTDLDELKNNILSGDTNIDAILVEHPGMYHMYGRTLDKLEDLRMSKVFRSEMTECEWLWGPTGTGKSHRAFAGYSPESHYVLPNDNGWWDSYKQQEVVIINDFRGWIPYNELLQLIDKWVFNVRRRGRAPLPFTSRKVIITSSLHPAVVYNNRNSEDSIEQLLRRISVIRLETVLK	unclassified	CRESS1|und(circolike)	0.2
FJ959079	Circovirus-like genome RW-C	MNKRIRNVCFTGFNETGYDFNENQMKYLIVGKEICPTTGKEHWQGYVELKNAKTFSAIKKLFKDNKLHLEERKASAQCASNYCKKEGNFKEFGKISEQGKRTDLIELKDDILAGKKNCTEVREENPELYHQYGRTLDKLEDDYLCKQKRNWMTKGIWIWGPTGCGKSRWAYETYPNAYTWADDKDWQDCYSGQETIIIDDFRGNIKFQNLLKMIDRYEFKLSRRGRVPFPLLAKTIIITSSMPPEKVYKNLSVDDSIEQLKRRCKIIELPKCTEENYTEVVRVILENSV	unclassified	CRESS1|und(circolike)	0.27
KF738881	Dragonfly larvae associated circular virus-7 isolat DflaCV-7_NZ-PG5-LH	MALILAKRVRRVCFTLFEEVPPEFEEEWMQYLLVGREVCPATGREHWQGYLELKSQMLWTTVKGRLGDQVHLEECNGSAQDNIVYCSKDGNWVEWGECKVQGARSDLSSLRTDVLNHGVTVAEILEANPMTYHQYGRTLLALEDLRYSRVFRDCSAAPTVTWFWGPTGCGKSHESRARALALAGGDRSKIYVLANHDKGWWDLYNLQEIVILDELRADQVPWGLLLQLTTNVECFVPRRGRQPCPFVAKHVFITSPLHPRDQYADRCGIDNIDQLLRRITFIEERNVPYAAGVFNHSKRLLFQGSMRTERE	unclassified	CRESS1|und(circolike)	0.21
KC248423	Diporeia sp. associated circular virus isolate LM360 replication-associated protein and capsid protein genes	LYFKIGTEVMAKKRSFAFTWNNYTSENVVFIKQYITDNARYGCFGKEIGEEGTPHLQGYIQFENPRSMKKLIKDLKGCHIEICKGNKKQNIDYCSKTDPDFWSYGDPSCQGERTDLRELVRDILTGELKLSNILREDPFVYHQYGRTLDKVEDLKISELRREHFTRGVWWFGKTGTGKSYRAKHYCIDNKLSYIELPKDYYKNGWFDNYKGEDVIIINDFRGKIPYEDILNICDENQFSFNRRGRCPYPCISKYVFITSSLNPYEVYNQQLHKNDSLCQLERRFDILECKSQNTEPVEYILKDDNRFDEIFNLGSERK	unclassified	und(circolike)|und(circolike)	0.4
KC248424	Diporeia sp. associated circular virus isolate LM2183 replication-associated protein and capsid protein genes	LERKMSKNRSYCFTWNNYSIENIDYVKDYITKNSKYGCFGVEIGTSGTPHLQGYIQFENPRSYKKIINDLKGCHIIISKGNKKQNIDYCSKDNSFWEFGNKDTQGERTDLKELVKDVLNGGVSVNNILRDDPLMYHQYGRTLDKVEDLKISELRRNHFTRGVWWFGKTGTGKSYRAKQYCIDNKLSYIELPKDYYKNGWFDCYKGEDVIIINDFRGRIPYEDLLNICDENQFSFNRRGRCPFPCISKFVFITSSLNPYEVYNQQLHKNDSLCQLERRFDILRILDKNSEPIEYVHDKMDDEKFELIFNLGTEQKRVG	unclassified	und(circolike)|und(circolike)	0.42
KC248425	Diporeia sp. associated circular virus isolate LM28925 hypothetica protein and replication-associated protein genes	MKSRSFVVTNWNLNTTEVYEKYKSQIKFIAFGEETCPTTLRLHHQCFLYFHNPRASGARALKTIGQMFGEIHCHVEPMRGNFAQNEAYCSKESVLTKLGDEPKQGARGDLTETCALLRNGTISVDSVACEDPSAYHMYARTFIHAETLYLRSKWRTEMTQCKWYWGKTGVGKSHKAFKDFHNDTHYVKDLECKWWDGYKQQDTVILNEFRGQLTFSFLLSLLDKWPLTVPVRNRESIPFTSKLVIITSSVHPKDIYKNVLSCDESLAQLERRCKIKELLTLYSPVCASLLKNSPP	unclassified	und(circolike)|und(circolike)	0.3
KC248420	Diporeia sp. associated circular virus isolate LM2917 replication-associated protein and hypothetical protein genes	MAHITRMVIVINNPVPDDYDRMKIICGISRYAVAANEVGECGTPHIQAYVALLKDKKQRQAGWKKMLPRANLKFAKGTERENALYVKKGEQTKAEFAAFKDAGPNYGKNLDLIFEHGTMDHKGLDGTLFNCATAIAEGTVTVDEIAKEYPETFVRFHRGMRELEAIGDRKKFRNWRTTAEWVHGFTGVGKSYVWESAYDPEKMFVMKAEDKGWSDGYTGQPIVIIDELRKGQISYAMLLKMIGSGPYWLSNRGRAPTPFLAKHIYITSCYHPRDLYNDLDGDDSIDQLLDRLGGNITHMMGKSKRAVQENIFLRDIIKDALCEEASCSQETGGPQNYGLPKEFNFG	unclassified	und(circolike)|und(circolike)	0.1
KC248422	Diporeia sp. associated circular virus isolate LM1906 replication-associated protein and hypothetical protein genes	MSNNNITNMCVTINNPMPEDYERLRELSVIARYAVAANEVGESGTPHIQAYVALTRNNKKRWAGWKKALPGAHLEVRVGSEKRASDYCKKGEQPKEEWAQLHELGLNFGLNADVWMETGLLDHRGLDGTLASIGRAMVDGEMFVQEAAMEYPETYIRFHRGLESLEQRVVPERSADTPKEVHVWVGPTGCGKSMHARSLCVDPYVWGPHMKDWFQKYRYQKHVILEEFRGQLPFDFMLILLDRYGMQVMNKGGSVEFLADVIHITSPIHPGWWYSAGSMRAGDDVDQLYRRLTTVNVWDPDTKSWQLDTELFSCASPRDGVC	unclassified	und(circolike)|und	0.29
KF133814	Circoviridae 7 LDMD-2013	MQNENSIEKFFDLEAAGPTDPESEDESGFSDFIASESDEEESQPKRARVDLVPAPGPDDGVRRGSTPLDKRCRGWCFTINNYTDSDERLLVQXFDDNPKCEYLIXGREIGEQGTPHLQGYLYCENARSGSAIRHAIGDRGHWEAAKASPTQNKAYCSKQATPANPVVELGRLPVQGKCKPLTQVVKDQCSGVNVSDYIRDGRFDDAATWVRHFKGLAALRFETTXPPISFEYGPTGSGKSRWAHETFPGAYYHPQAGKWFDGYKGESVVIFDDFRPCNELAYNWLLKVCDIYPMKVPIKGSMAELCATTIVFTTPEKPENTFVLQEDIGQLLRRIGPNIKRFGTSTMEAQEAQLNTNVFGN	unclassified	und(circolike)|und(circolike)	0.35
FJ959080	Circovirus-like genome RW-D	MLAQAPGRYRNWVITVNNWTENDYKLALLSPYRYIIIGRERGECNTPHLQIYLQLYHAKSFDTVKQNFFPRAHLEASHSKPRQARAYCTKEHYFEYGEMSTQGKRTDLQVAQELLDSGISIRQALESEMITSMGALAAYEKLQKYYTVHRPRPRVVWIYGPAGSGKTDKAYSISGPDVYKSDLIKEGWFDGYDRHRSIIIDDLEIDRDDKKTFGLLLSLLDKNPQKVNVKGSSASILADTIVITCQQAPWHIWYHPSDNMSLPFKHMATREEIERDVDLRQIMRRITEIIHLTDTDKVKYPEVTEV	unclassified	und(circolike)|und(circolike)	0.35
KM874340	Avon-Heathcote Estuary associated circular virus 16 isolat AHEaCV-16-NZ-3310C1-2012	MADRRPHKSWTYTLNEPTDEDENRIHLWDVSRQIYGHETAPTTGQHHLQGFVSFRAAKRFTGVTRLLPRAHWEVAKYPSSAWDYCTKGDDLYVVDNRVGRGTRSDWQDVLDLVSEGASDAAILRAQPSCFFKYGAGISRARAALQEPRHHQTLCEWYYGPTGGGKSTYIAQEHPEADWCQITKSGFLLGYHNKPTVVFDDPDLDAFGRELFLNLVNRTPFEMNVKGTSVAFNAKLVIVASNKHPDCFIPGDAAVHRRIHKTFLVSCIDGEHMVEQQ	unclassified	und|und	0.22
KP153499	Lake Sarah-associated circular virus-43	MQSRCWCFTVNFKYLNDYEAIDPAEWPGCVVAVWQHEVGEGGTEHLQGYVNFAKPKRMGALHKLSGMARASVRPRAKLATKKDNLVYCTKEEGRLDGPFYFPSKEKVEAYCKVENGQRTDLALISDQVARGLTDKEIAEINPIAILKYQKGIDHLRIAITDTSRLGDEVDSMVFVGPTGTGKSYRLNRDYPEGPEWFWVSPGKWFDGYQGQPGLVFDEFRDNWYPYQFLLRLLDTKPYRVEKKGGHLSMRAHRFRFSTNIHPMHWYQGVVKPAWEESPLKRRLPYIELMEVPYDRPTVSFDSAAAWALLQPEAVAPAARAVYGQRMDG	unclassified	und|und(circolike)	0.32
KC172652	Gastropod associated circular ssDNA virus	MAQRVRRYCLTLNNPTPEECHHLLTLRESVFKRGFFASEVGKKGTPHLQGFVHLKNAKTLTGLKKFLGSDRYHVKQANGTDYENWQYIGLLNEGKAQGDLIVQWGETPTEEGDPDAWDSILEMIEGGFNNRDIVRKWPSIAIRCQSAIDRYRVEYEWGECRAWRDVEVEYIGGPTGTGKTRGVLYHADGRVNTDVYRCTNGKHPFDKYDGEGTIVFEEFRSQYTCRDMLNWIDGHPLLLPARYADRMAKFTKVIILSNWRFAEQYRTVAEDSPETYKAWLRRVGTITEQWV	unclassified	und|CRESS1	0.07
KM874328	Avon-Heathcote Estuary associated circular virus 12	MSQRTRRYCLTLNNPTDAEIASLLDVQEGTLKRGFIALEVGAEGTPHLQGFVHLKNAKTGTALKKMLGSDRWHWGKANGTDFENWAYIMEDVEGKVQGDLLIQWGDKPAEEGEPDAWDSILMMIEAGEDDRAIVRKWPSIAIRCQSAIAKYRASFEWAECRAWREVEVEYISGPTGCGKTREALYLPDGRVNTDVYRCTNGKHPFDMYDGEGTIVFEEFRSQYTCRDMLNWVDGHPLMLPARYADRMAKFTKVIILSNWRFEEQYRTVQADSPETYKAWLRRVSTISERWD	unclassified	und|CRESS1	0.11
KM821760	Sewage-associated circular DNA virus-25 isolat SaCV-25_NZ-BS4281-2012	MSSSSRWVFTVNNPGAWRPHYDVTAMQFLVFQMEQGASGTPHIQGYVRFTHPKKLEAAKRALVCEEAHMEIANGNEGQCIDYCTKEDTRIGGPWVYGTQKRDAGRKGSRSDLQAVAEAAQKPGVSMRQLAREFPAQVIKYSQQIERYMALVEDEVPIERDIFVHVIWGPTGTGKTHRVRHGIPQRDLYVVNGKGRGCFDQYAGQKALVLEEFEPNEWSINEVKTLLDKWTCPLNARYSNKTARWTQVFITSNSDPMSWYQLWLPADLAAFQRRLTRITHVLSREQEVELFPLPAVALPPPSPAVAPSPIAARIAARPCWSGAMDADLPQPDQVTSADPLRAAGTSNAPAIPTPRLPTTPTPDPLNVQDIDGIGAITAPAPVTRTTSVDLQAFFSNN	unclassified	und|CRESS1	0.23
KM874323	Avon-Heathcote Estuary associated circular virus 11 isolat AHEaCV-11-NZ-3371C1-2012	MIAHNRAFFTISITGLKGMCDIIFFLFLSLAQMASPKKYNRMIFTINNPGPNRPQFLEQHMAYMIYVLEEGDQTHTPHLQGYIRWKCRKTFKSAERLLGGRAYLEIARGTEEENQAYCKKEEGVLEPWQEFGTYDGGSGIKGRRTDLEAVAKRVREGASARTIAVEHTEEFIRYHAGIERAVYMARPEPPAQRQIEMMIIWGPSGIGKTHAVMMNDGLSESGGVYCVPTGNHPWDQYEGEATIFMDEFRWEHWECTLMNRILDKWRLQLPCRYMNKMAAWTRIIICTNQDPMTWYPNEELPIRDALRRRLGTNCRHMTERGQDLAASPPSPDFSSYIPPAMRVQDSLDDATVPASDS	unclassified	und(circolike)|CRESS1	0.19
FJ959086	Circovirus-like genome BBC-A	MKITTEPTKRRDWAFTDFNMENQTKYASLVEQCVCSYVCFGIEYCPKTNRPHLQGYLHFKNPRTTREGRNVFGKTHSEFCWHSREKNINYCKKGTKVLGETFFEFGKKPNQGYRTDIENVEYILKTTRSIQGIIDNHFNLYIQYRSRFLNYLEDTEKPRAEMTKGIWYYGPPGCGKSTVIKNNFFGTEVVWLEYDGKYFSDYNGHTTVIFDDQDISKFSRSMILKLINHTPFKLRCLGSYREFNAITVIFIDNFHYSHYFGEDEAIARRLKAIQFGTEVPK	unclassified	und(circolike)|und	0.24
KM874290	Avon-Heathcote Estuary associated circular virus 1 isolat AHEaCV-1-NZ-2981C1-2012	MKTRLWCGTQYDLGFNFEKLVDDEILTYVAWGDEVCPTTERKHKQFWCMFKSPRGSMKQVGKVFTSWPNKGMQGKVFPCSGSIKSNEEYCKKEGSYHKYGKEPEQGKRNDIIGCMKMVKEGAAELEIAETSPHLWCQYGRRFEEYRALLQPDRDWVPEVKVWWGEPGSGKSRAAREWLGEYDVCTYTAGGFFIGYKNHESVLLEDFDFKSMPRDVFLQCTDRYKHVVNVKNGERNWNPRRIAITSNFDPEEWYKWGDPKAVTRRITSITKMEHK	unclassified	und(circolike)|und	0.27
KJ547649	McMurdo Ice Shelf pond-associated circular DNA virus-4 isolat alg49-63	MSSSDSDSSESVSKRAKYVEAESADAPKRKTQPQSKYWVFTWHGPPKDDEGNRASPALWPEPQFDADMMDALQYQMEIAPSTGKYHYQGAVAFKTRKRSDPLREALAIPGAWTQMMRGSDKDQVYTNKEETRAPGYEPHMHGVWPRITQGKRNDIQAYVEDRKAGSTNAELAEKHASVIVRHYKGLDALFNLPAGRPGQVRDRHTPVQVYVYWGAAGTGKSREIWDKHPDLYEKDPNTTWWCGYKGEDVVLLDDYEGTLPWNYLLKILDRYPMRTQTKGGHVQLLATKFYLTSNLPYTEWYGRYKDYAALTRRITEVRHFTLPDPTPEPVAERTAINRTLVHTARTIS	unclassified	und|und(circolike)	0.12
KP406530	RDHV-like virus SF1	MAKSYRSSFMACYGLPNPNMDKIEYICWQEEICPKTNRHHWQTFVRFKSKNSILALQKAIGIDQTLKYTDESGVEHFAWKCHIKPHSKGTDATCIEYCQKSESSVPNTFIEFGKKPDIKPGKRTDIEQAILEINSGKEPNDLILMKYPQGVKALKAKVNKVNTQGRRNVKTFVYWGGAGTGKTSSVIKKYGQNNVYTLDKSKNEVWFDGYDQEKVLLIDDFYGWIPWGQLLRLTEGNQVKLQVKCHFTYANWDKVYITSNKPYEEWYPNIENYEALDRRICSVTFFKPLPDGSIKKPLTLTLKQAEALADKEDVEPEFIIQQESTEDEILSLQPIEITL	CRESS1	CRESS1|CRESS1	0.13
JX908740	Cyanoramphus nest associated circular K DNA virus	MNHARARSKNWCFTSYDESEPDLARHQEHLTYYIYQPERGVQGRRHFQGYAESRERIGVRELQSFIGSRAHCEIAFDPEASRLYCRKESTRDGVTTEWGLFRGKKQGSRTDIGTACDTIRRSGLGACIKEHPETFVKYHGGLTIYAAQQFDPRRCTDDPPDVRIYYGVTGIGKTRSVYAQYGNDIYTKDDSKWWNGYAAQKCILFDDWVGSEEISPVSLLKICDRYPLQVQTKGGYVPLARTTTVIIFTTTQHENFWYGGTKHEANWCSQRAAWDRRVSERRTEWTQP	unclassified	und|und	0.15
KX388503	Cruciviridae sp. isolate CRUV-24-F	LLASHSSMNRLPTKIKEEKKGRVPNGEGVTYKTSKSWCITSHLVNAPVFDEKVHQLMVYQQEKGINPGKGQDGLHWQIYVKMLKTSGYRAVQKSLCKTEEYKQLNCNIAVGSPKQNRDYCSKSSTKVGKTFEFGNWPETGQGARNDIRAAGALAKEGKFKEIELDMLVKYHGGLDRVHREYFRTGMPYPRNVEVRWGAAGFGKTYGAAQDYNFEASLIKGLCTGKEKTPWFNGYNRGDEVAIIDDFDWENFPIGTLLDILDSYICQVQVKGGFVPWMPKTIIITSTVNPKDWYPGRRQPEVLRRINLITHITEHWRIRLAKEVAKEVVDKINYADNEEEAIKFVRQKTHEHITPTKVIPTETEDNVGDLTIEEIEEMLNGCKPESSSPPSS	unclassified	und|und	0.14
KX388498	Cruciviridae sp. isolate CRUV-19-B	MEYFSGTKYNLRSMSKHRDYCFTVFFGDKVEESKHNEGLICDTNTYIVYSIEKCPTSGKYHYQGYLEWKSPITLKAIVKKLEEYFPGCKAPHVETRKGTPDEAAAYCKPKDLHGNQKPSHISGPWEWGQMKPGQGARTDLSLVANLAITKSTNEIIKEHPELYVKWYKAIADIKSKMFLPRNEKTLVIAIYGPTGVGKTAMVDFQFDNHYVKEPYSPWWCGYENQDVVLLNEFSYDAYGGRPKLLQLMDRYAYTCQYKGGSKQFTSKVIVTCSLNNWLLNETEEMKRRVTLLVRIDENHQKHIEMDNGDLQAEASRIHQEKKAIMNNMPFKNKTDLDSVRTWARTNI	unclassified	CRESS1|und(circolike)	0.19
KX388499	Cruciviridae sp. isolate CRUV-20-B	MEYFSGTKYNLRSMSKHRDYCFTVFFGDKVEESKHNEGLICDTNTYIVYSIEKCPTSGKYHYQGYLEWKSPITLKAIVKKLEEYFPGCKAPHVETRKGTPDEAAAYCKPKDLHGNQKPSHISGPWEWGQMKPGQGARTDLSLVANLAITKSTNEIIKEHPELYVKWYKAIADIKSKMFLPRNEKTLVIAIYGPTGVGKTAMVDFQFDNHYVKEPYSPWWCGYENQDVVLLNEFSYDAYGGRPKLLQLMDRYAYTCQYKGGSKQFTSKVIVTCSLNNWLLNETEEMKRRVTLLVRIDENHQKHIEMDNGDLQAEASRIHQEKKAIMNNMPFKNKTDLDSVRTWARTNI	unclassified	CRESS1|und(circolike)	0.19
KX388500	Cruciviridae sp. isolate CRUV-21-B	MEYFSGTKYNLRSMSKHRDYCFTVFFGDKVEESKHNEGLICDTNTYIVYSIEKCPTSGKYHYQGYLEWKSPITLKAIVKKLEEYFPGCKAPHVETRKGTPDEAAAYCKPKDLHGNQKPSHISGPWEWGQMKPGQGARTDLSLVANLAITKSTNEIIKEHPELYVKWYKAIADIKSKMFLPRNEKTLVIAIYGPTGVGKTAMVDFQFDNHYVKEPYSPWWCGYENQDVVLLNEFSYDAYGGRPKLLQLMDRYAYTCQYKGGSKQFTSKVIVTCSLNNWLLNETEEMKRRVTLLVRIDENHQKHIEMDNGDLQAEASRIHQEKKAIMNNMPFKNKTDLDSVRTWARTNI	unclassified	CRESS1|und(circolike)	0.19
KX388501	Cruciviridae sp. isolate CRUV-22-F	MEYFSGTKYNLRSMSKHRDYCFTVFFGDKVEESKHNEGLICDTNTYIVYSIEKCPTSGKYHYQGYLEWKSPITLKAIVKKLEEYFPGCKAPHVETRKGTPDEAAAYCKPKDLHGNQKPSHISGPWEWGQMKPGQGARTDLSLVANLAITKSTNEIIKEHPELYVKWYKAIADIKSKMFLPRNEKHLLIAIYGPTGVGKTAMVDFQFDNHYVKEPYSPWWCGYENQDVVLLNEFSYDAYGGRPKLLQLMDRYAYTCQYKGGSKQFTSKVIVTCSLNNWLLNETEEMKRRVTLLVRIDENHQKHIEMDNGDLQAEASRIHQEKKAIMNNMPFKNKTDLDSVRTWARTNI	unclassified	CRESS1|und(circolike)	0.19
KT732822	Pacific flying fox faeces associated circular DNA virus-5 isolat Tbat_H_25288	MGSRRYVFTIFVSSDRDWITEGIERQNVKYLVAQQEICSETGRLHWQGYAEFKKVCRIPGAKSILGCDWAHLAVPNGDRKANKDYCTKLASRAPGGESIEIGKFEEGGQGRKSTSVAELREEIRGGQTTLRQEIVEGRVLNIGAIRYFERLQSELDSGYQRGHQIAAYLFGTPGTGKSHIAHAAVEERTWYSKDATTKWWDGYSGEEVVIVDDWSGPSTQAEADQWKKWVDRYPCRVETKGGHVWLKTKQWIFTSNVRWVALPVFFDAALKRRFIGNG	unclassified	CRESS1|und(circolike)	0.07
KF133811	Circoviridae 4 LDMD-2013	MSRSRGWVFTAQAGSSGLSAIATLLDNVDCDYMVYQEETGAGGRKHLQGFVWWRTQRTFNSVKGKLPDGVHLEKQRGTNKEAADYCRKVGPGGWNGGHRGERGEQPADAGRPTGGSKHAVEALRKAQKHGVKRVLDEDPECFLKHHTALEKAARLEATARVPQERDLTVWWIHGDAGSGKSRFATRYDNPDNTCIISDSAGGWLDGYAGQRTLVIDDFEGLMPYQQIKRMLDVYRYQAPVKGDHVAAEWTTVLITSNEHPSSYYQQDRWSNDPTTPSPLQRRITAVYKVTGCHPGPVTWTPPQPAPRPPAVPPPPPPPPPPMDGDDASEEEEEGGPLPPTQRVSLSDSQLLADGIFDDFLDPTDLFPQPSSGEDIFADLDGVGDPEPQGQALC	unclassified	und|CRESS1	0.17
KF481961	Penaeus monodon circovirus VN11	MPRDRAKRWVFTWNNYTPENVAHLQEINCKYIGWGYETAPSTGTPHLQGFVYFHKQLRWKAVMAIMGNPSFVEVMEGTVEDNIAYCTKGPGEFWQSGPPPTEKKKTEFKDILKMTLKEADEVMREEHTWQSGSSNWKRLRSSMIKHYIGEMEVLWFYGPTGTGKTRCAVEEHNGELIEFDGKFFDYKGGADCVVLDEIDKLEKPIPMGTMLRLLDRYKYSLRVLGDYVPRDFKKIIITSTNHPEVVYSQSHCEQLLRRITKIVEFN	unclassified	und(circolike)|und(circolike)	0.14
KP153426	Lake Sarah-associated circular virus-17	MANPTRQNARHWIVTQHDIDAFWRGDPTGHHAIKYLVFQVEQGAGTSAWHIQGFIQFKTCVRGSVVQRLFGGNKPHVEVAHHPSQAREYCMKEDTQVTPPEEFGTWEPTFAQGYRSDLTVAKLQIRQHGNYRRCLDDDALDTVTARYPKWVADQLTMVPRPLRPIPIVTVYYGPTNTGKTARCHINNPGIHEIRLDNGFINYTGQSCVLFDEFDKDPWPFGTMLKLLDRYPFQINVKNGYSWWEATHIFITATEAPCDWYLGKKGVNSDHIPQFLRRLTNVVNTTGSVLPPPLPLSPPTLPVPPSPEIEEQQEEATMELDDPTNPEDYENSEERDLREEMEYRDQYQGDSEEY	unclassified	und|und(circolike)	0.19
JX904412	Uncultured marine virus clone SI00094	MSTDNFVASSFTFTINNYTEENIASLKAIPCLRCVAGYEVAPTTGTPHIQGAIMFAKPMRRDAFKKVIGFTSNCDKMLGPWSSQAYCCKDGAICRMTDTDNQQGKRNDIVAMKDAAKRGASDMELIDEHTAIMAKWPKFANTVRHTFRKIEPLPLGTKGTIGLWLWSSKGNTGKTTWAETKWPDAYDKMDNRFFDNYNGEEVIIWDDPVQKTIGQSMMGYLKKWCNEKIVRVEVKHDSQLIRFKHMIITANKSPEDFFGENFERSPFDARFQTVEVKNRDDLVARMYQFNWSGNEGR	unclassified	und(circolike)|und(circolike)	0.07
KP153463	Lake Sarah-associated circular virus-31	MSRSQAYCFTVNNYEGLLDWEDLQLAGATYLIYQEEIGEQGTIHLQGYIYFSTKKSMKQLCALIDGSSVRVANGSPQQNTTYCSKEEGRLGGPYVYGTMPQQVRTTSIASAASTARGDKNKKERKGEEFSRANSKKNYSAKNFYPPREKEPTCSPSKPIKMPACPKPNSGTITMPICALSQERKIYSELKIKPRNTKPTVLLLVGPSGTGKSRTAYQLAQFLGLTIYVVPPTKGGSGLRFDGYNQQDVCIIDEVDGSSFTPTFFNLLCDWYEMKVPVHGTANLQFTSPYIILCSNYLPKYWWKSRSSDQVKQTTRRIDITIPFFRRTPQVQPAPSINLPEDLDEFGFVTVHPIKMPHYYVQPLERFPPKITDKMIFPL	unclassified	und(circolike)|und(circolike)	0.21
KP153460	Lake Sarah-associated circular virus-31	MSQSRDYCFTVNNYDGLLDWEDLQLAGATYLVYQEEIGEQGTVHLQGYIYFPNKKTMKQLCALIDGSSVRVARGSPQQNTTYCTKEEGRLGGPYVYGTMPNQVRTTSIASVASTARGEKNKKERKGEEFSRANSKKNYSAKNFYPPREKEPTCSPSKPIRMPVCRNRISGSITIPICALPQKRKVYSELKIKPRTTKPTVLLLVGPSGTGKSRFAYRLANFLGLTTYVVPPTKGGSGLRFDGYNQQDVCIIDEVDGSSFTPTFFNLLCDWYEMKVPVHGTANLQFTSPYIILCSNYLPKYWWKSRSVTRSSKPLAASTLRSLSSVERHKFSLLLASICPKIWMNLASSRSILSRCLTIMFNPLNDFHQKLQIK	unclassified	und(circolike)|und(circolike)	0.15
KU343138	unidentified circular ssDNA virus	MTDEDGPRVRNIVFIINAIDGDDLVSQLRLLDFQHPTWKHVKYCIYQRECGGEENRIHFQGYMEFHIQQTYKQIHAMEGMHNAHFEKRIASAKKAKHYCMKPVEGCDCANCEAEVRNPTKVEGPWEFGEMSHQGARNDLLEVQREIERKTPMRRIAKEFFPEWVRFRQSFNEYRRHQTLCRDFKTKTFLFVGPPGKGKSTLMKIIARQIGSWYKVPHKKGSGLYFDDYDNQEVMILDEFSGASMPPEFFNLLADEHECVLPVHGGAGHQMVSKYLFIGTNYAPKFWWKHRTPAQLLQTTRRLDVVFKIGMTKPQMVELHGIELMRPLTHNSVHYPLFQLN	unclassified	und|und(circolike)	0.27
KJ547651	McMurdo Ice Shelf pond-associated circular DNA virus-6 isolat alg49-69	MEPRNRNVCFTINATDGIPLLLLDPSHSSWMHVKFLVYQREFGSHEHFQGYVEFTQPKSFTAIHLLEGMEHASLFSRHGSAKQAAHYCMKPVEGCQCQHCCEEASSPTKLEGPWTFGEMSSQGQRADLLEVKRRIDDGSSLKRLWRDTDTFPTMIKFHRGFETYKRLTTLPRDFKPKVILFCGRSGMGKTSAAYAIAQRLGSVYSWPNKPGGNFWCDDYGGEDVFFLDEMNGDKMTPEFFNAFVDRYPFVVPAHGSAGHQLVSPYIFICSNYAPKFWWKKRNADQVHQTMRRIDVVFKFLLPPPLLQPCPHCAKNQRGFFCPFHHL	unclassified	und|und(circolike)	0.28
KP153504	Lake Sarah-associated circular virus-47	MIFGAFLTGRGPQSTHWCFTVHRPQRRPAVLPESCQYLVFQIEKTAQGKRHVQAYVQFPVRTRGTTVSSLAKRIFGGEPSHNEPAKGSDQENEVYCTKEASRLEGPWRYGERVPHAGKKGGRSDLLKLKDNVDKGATELALFEQQFGDMVRHHRAIGHYRYLKFNVERHWETIVILIVGPTNTQKTFLSEVLARSGYFGKTVWRAPESKGSGMYFDGYNGHECVLWQDFDGGSCKFGTFKNLIQGTPTNVPVHGAASIEWAPRVMILTSNYLPKYWWKSHQGANDLAAIYKRVHVIFKRLKPVENMPRVAPIFHPASLYPPRPDPPLAVKPLAISKSKKLFN	unclassified	und|und(circolike)	0.18
KT732824	Pacific flying fox faeces associated circular DNA virus-7 isolat Tbat_H_85975	MGADGNHHYQGYIEMPRSVKFTHFKCLAGAHFEKRWGTAQQASDYCNGLDHKKPGDKSIVIDGPWIWGTMSKGQGSRTDVLNLRDAVKGGKRGRELYDDDTVAGAAIKFSRGVAELTRAYSTAPSRGDIRCIFHFGPPGTGKTHCAHDDKGIFNINLTITLTLYIAYYFDGNNGGFWIGYQGEETAILDEFGGHTLPPKQLQRLCDKYPYWMSIKGGEVACHIRTVHICSNYLPSGWWSEKTLYNEDAIYRRIVEVHWHYEFKKYRLYKTDDPLDKSTWAMYKFLKAKLELEYTPIVHK	unclassified	und|und	0.15
KF133815	Circoviridae 8 LDMD-2013	MIPICHKGGCGSFWLTKKKLERTERCICRVMCTLKMTKTFSTVRNLCPQAHWEPRKGSHQQAVDYCTKEETRRPGCDPVVVGDPPSQGKRTDIMDVKSFIDGGCSREELWSEHFSAMSKMYKAMYEYSFVRSGERNWKTRVTVIVGPPGTGKSMFCNNYHGQSYWKNNSLFFDGYHGQDVIVMDDFYGQLPWSTLLKLADRYKLILDIKGSSVNMLAKELFITSNADIEEWYSYKPGMDIRALERRIDHYVNVDESGTITNRSSYEPHKILTNGKKLVDMANLIKNFVFSYKPSEDGSGFSTNVTIDEYEIRRHLTVNPEVLSAPEFLELSDKLSHTLNELEYQVAELRRKVANELVDVPINFQRESSSNLSARDIMEVAERAVEEVRGHPNLELEDRH…	unclassified	und|und(circolike)	0.24
KU043400	Unidentified circular ssDNA virus isolate cg_8815	LEWLKCALGQLSCGNFHAENGSRKRKNVNEPTFKRRSKFFWNTLFSFETDERMSAASKESMSKRWCFTINNPTDEDKFWENDEQRTQLEYLIVQYEVGENGTPHYQGFLILKRKNRLTWLKKNINSRAHWEKTRGTDQQAADYCRKDDTHPEGSLRFEFGTLKAALKRKDRDELEEAVIDEVKKLQDEGFRSVRDIDPQVLARPGFMAAYNALTADLLGVYRPELKIITMVGPPGTGKSYAINALFPNAGRAIMGNSGTWFSNPTATVMVFEEFAGQIPLQKMLKLLDPYPMALEVKGGMRPAMYTVVVITSNTRPDGWYKDEEQGGKRTDALLALWDRLGFKNGNNSICRTCGTYLEPAQPGAISKQWLESTRTWFINELAKAAKLQEHEELSDEALS…	unclassified	und|CRESS1	0.36
KT862230	Bovine faeces associated circular DNA virus 1 isolat GP3-46075_cow2	MSDRTKAKRWCFTINNPFNVDPIIASPGAEDDPDEPVVIDLRYPFWYHHAMLAVFKVEYMVAQIEKGENGTPHWQGFIIFKDQKRLQWLKDHLDKRAHWEVARGTNQQASEYCKKDETYDPSVIPADMKIRGRFEWGSMPERNVPKKDERLKLAADELDTIKDGYKRPAEIDSLTLMQCGFIPAYKELTADILGPYRPKLQIITMIGPPGTGKSYAIQQYFPNHGRCICGNNGVWFQNPTAPVMVFEEFCGQIQLQRMLQYLDPYPLALEVKGGMRPAMYETVIITSNTRPDGWYTGDQAGQPGKRTDALLALWDRLGFESGAYVPVRTCGHYWEVTPGWSIEEARDFFTLKVTRFLDIAEIIDDEDGQGHPGAAAAADSQEEHRSIYHH	unclassified	und|CRESS1	0.22
KM573765	Dromedary stool-associated circular ssDNA virus	MSSGAERNMNAKRWCFTINNPVSDPDQDNNDRFWDNSPGSSSCEPFAVHMDYLILQEERGENGTLHWQGFLILKERHRLEWLRRHFTPRAHWEIARGTNEQARDYCRKEDTYTGGFRLEMGELPERAPSRTREERLQQACEELDIVKAGYKRPREIPSMTLMQCGFIPAYKELTADVLGPYRPELKIITLVGPPACGKSFCIQRNFPNHGRAIMGNNGVWFQNPLADVMVFEEFCGQIQLQRMLQYLDPYPLALEVKGSMRPAMYTIVIITSNTRPNGWYKGDEAGDPGKRTDALLALWDRIGFACGGYVPARRCGHYLEAPDGMSILELRRWFDRQVQTILLGHEPISDDEMPTEDMEWEEIAHQVERRQIGYGDH	unclassified	und|CRESS1	0.33
KP153411	Lake Sarah-associated circular virus-12	MAYNFCFTCNNPTDAIETYIQSITMSDLFGYAHEVGELGTPHLQGVVVLNKKSRLTAVRKILPKCHISQMRGSFAEAWDGYILTPHAKHNKPEPEVVYAFGTPPVVRGSNTRDVYEEAMAIAKTGTTEGISAQMMLRFGKALHEVAQKHSPKPPHIDGDLDNYWIYGPTGSGKSKTVYDKWPRDTLYIKLHNKWWENYDGEETVYIEDLGNDSKLLTHIKHWADRYAFRAEVKFGSILIRPKRLVVTSNHTIRDSFPTASVADVEALERRFKIQYIGPQIPAFTSVTK	unclassified	und|CRESS2(circolike)	0.43
KT149405	Circovirus-like genome DCCV-12	MPPKAQFNRFCQITKKRGFCWTYHDYDDEIVAHIKGLFDRPNGWVKRLVFNYEICPTTGRRHLQGCLYMRDNQTWPKLKADIGLEKIHLELAQNVEALDKYCQKSETRDPAHPEGVVLGVAPLTDEAKGQKGEEYYERNILACMNGQQMDASAEFNLRNFEYAAEARKRKRELASLDELSFEWHYGEPFSGKTHYCRKIPGAFKWNSKAGWNNYNDEEVVICDDVDERTVPEQQEIKTWCDLDPFQVKVNYKVLNIRPKRFIFTSNESIADCFPRAKPIHLKAIERRFKVYYYPAAYGEPGWVDPTAIPQKYLFTDEEMDAQLSV	unclassified	CRESS3(circolike)|CRESS2(circolike)	0.03
KP153469	Lake Sarah-associated circular virus-33	MNNNEEYERWLNMDTFYNPLEYSQTFTPPLSLTTSQQLPPIPMPMTPIEGDPRERVGTTAMCGLPRAMCAGAPEEEKLASAVCALSLEDLADNKETFKCRSIVFTCYKREAIDDPEAWLRGLQSKCVWVLGQLEKCPKTQRIHIQGMAYNKSDIAWAMLKGESTWKRKCIAPIKSIEYCTKAKSQLAGPWEFGDRPAYGQSAKTSKLNEKKEMNATLLTMTPYEAVDEGYISWRDYEKLKLFQTTYKADKKIAEHLKRPIDHEMRHEWIQGKSGKGKTTKAILENPDHYLKTINKWFDDYQGQETIIIDDLDPTEAKWMGGNLKRWADKWPVPVEVKHGHIVIRPKKVVVTTQYMMEQLWDDPALIEALKRRFKIIDVDLI	unclassified	und(AlphaNanoSmacolike)|CRESS2(circolike)	0.07
KM874350	Avon-Heathcote Estuary associated circular virus 21	MPKARPSNGSRFWCFTINNPTDDDNQQLADLMSNDLCTYLCYGRETGESETPHYQAYIELLVPNDFLGLRNDLKELILNHASEAAPRQETTASRKISTQSNMVSGSPIAKGKGMTSRFFTEYRAMHAMERDAPTKVYVFHGPTASGKTRAAFDMNCHQMDYIAPFFTDPQNAPVLLFDDVHNPVNLFGRRLFLRITDRYPMKVRCLGKYVEWNPTVIIFTTNDDPNTWNLDAACRRRIDEIIAFPLDKGGLDALPACTQDQAKPGDLPQCN	unclassified	CRESS3(circolike)|und	0.27
KX388513	Cruciviridae sp. isolate CRUV-34-B	LEAKRHKQLAEWTTYGDPTTMNFIIGQLEYTQNEDEQDNFHWQGYVQFHKSLRFTQVKKYLKSYTAHVEQANGTLEENIQYCSKSASRVLPAKSYGKPVESGERTDIERLYVDVKSGKSMACIIDHHTNTWFKYHGAVDKAKFYLEQKVACQKRTCTVTVWVDQGQTGKTTRALYDINEDGKMIAKTGVFRLTHEEGRLWWDGYDGQPTLVIDDCVHLIKFDYWKSLVDGHPMRIQIKNGWKNALWNRVIINSNRHPNNWWPDNSEANLSMPYFKGRIALINDMAPLEFLAKHVQKTDVPVCAFEDIPLNAFIGEPPDDIFFPGGEEIKGNEGNIGDDGLLYTFNPPHVGPQAPMPIMGGIGQREALREFNDYHAFWKKKHNR	CRESS1	-	0.41
KX388514	Cruciviridae sp. isolate CRUV-35-B	LVNKFLKVILYLGTFMSKRPQQLRHWTFTIGGEEAQTITGIEDLWDATTMNFIIGQLEYTQNEKEEDNFHWQGYVQFHKSLRFTQVKKYLKSYTAHVEQAKGTLEENIQYCSKSASRVLPAKSYGKPVESGERTDIERLYVDVKSGKPMASIIDHHTNTWFKYHGAVDKAKFYLEQKTACQKRNCKVTVWVDQGQTGKTTRALYDIDEDGKMKAKSGVFRLTHEEGRLWWDGYDGQPTLVIDDCVHLIKFDYWKSLVDGHPMRIQIKNGWKNALWNRVIINSNRHPNNWWPDNTEANLNMPYFKGRIALINDMAPLEFLAKHVQKTDVPVCAFEDIPLNAFIGEPPDDIFFPGGEEIKGNEGNIGDDGLLYTFNPPHVGPQAPMPIMGGIGQREALREF…	CRESS1	-	0.37
KX388515	Cruciviridae sp. isolate CRUV-36-B	LVNKFLKVILYLGTFMSKRPQQLRHWTFTIGGEEAQTITGIEDLWDATTMNFIIGQLEYTQNEKEEDNFHWQGYVQFHKSLRFTQVKKYLKSYTAHVEQAKGTLEENIQYCSKSASRVLPAKSYGKPVESGERTDIERLYVDVKSGKPMASIIDHHTNTWFKYHGAVDKAKFYLEQKTACQKRNCKVTVWVDQGQTGKTTRALYDIDEDGKMKAKSGVFRLTHEEGRLWWDGYDGQPTLVIDDCVHLIKFDYWKSLVDGHPMRIQIKNGWKNALWNRVIINSNRHPNNWWPDNTEANLNMPYFKGRIALINDMAPLEFLAKHVQKTDVPVCAFEDIPLNAFIGEPPDDIFFPGGEEIKGNEGNIGDDGLLYTFNPPHVGPQAPMPIMGGIGQREALREF…	CRESS1	-	0.37
KM821770	Sewage-associated circular DNA virus-35 isolat SaCV-35_NZ-BS4050-2012	MEEGRESITTAKHFIGTIYLPNASPQDYCAWNGRTEAAVHLFEACVWQHEICPDTGRHHIQIYCHARRKVRYAQLNDALGVVGSWKTCKGIAHAIACYAYCTEEKSDASSRHGCKSSGWGDPPGRGAGGDAAISVDAAIEFAKSGKRRRELLMPENAEALRGAYLHPAGFRFVSELADQPRNTPDEWMQRYVICFWGGAGVGKSRRVREECAAAGLDLWVAPASPGGLWFDGYDRHPCALFDDFDGDMPWKQLLCILEGNIVQVQVKGGHVAFRPRVVYFTADCPPSSWTFSFGKGEARQGLNQARLDQLLRRFCHIEEVSSARDYREALNMNRRPAGPVPAGGEGGANIEIAPPLGEAWENVHVPQLPFDVVPDSEYVNELCNQ	unclassified	und(AlphaNanoSmacolike)|und	0.12
KM598400	Odonata-associated circular virus-17 isolat OdasCV-17-US-1619LM1-12	MTSEVMTSIAPGNTKPVALKARAYQFTLNQPDVYDKLKNILTGLKTMDYLISCRETAPSTGHVHMHVYAHFSQQYRLPKKIRDLGCHIEICLVGAKQNIAYIRKGGDIIDEIGDEPHQGARTVGELMEADIKSIDPHLYRIKKQIDAEQHDLDTFMSMLDEIEADDLKAPTVIYITGGTGKGKTYSAYKRALKEYPKKKIGKLTLKNDFIDIVNGDNAECFVIEEFRPSQIKASDFLQLTDKYGYRCNIKGGFATLRPKMIIICSIIQPEHIYKEEVNKQFLRRITERIDLGPELDPVDELYE	unclassified	und|und(circolike)	0.03
KP153454	Lake Sarah-associated circular virus-29	MSVSDDFEAGAEPIQLYGALLEICEIFAYQHEVAPTTGYRHYQGYLELVTKNRHTWIQNQLLKHGLHFEYLVGAKGLPKQAWAYATKEDTRADGPWTFGEPRDSEKANKSWLFVKAIKSGATDAELCDSFPGMMTNSFSNANRIRQAYGVQLPEPERTVPLELYLFYGPSGTGKSQFARDQARLAKMNPYVLPIGKDFWVTPAMCGKKYYIIDDFKSNLGLSDLLRLLDTYPVEAPNKGIASSEFSSLNGGVFNNFVRWPYVVDARNYCHYNQSITS	unclassified	und(AlphaNanoSmacolike)|und(AlphaNanoSmacolike)	0.1
KP153359	Lake Sarah-associated circular molecule 1 isolat LSaCM-1-LSCO-2013	MADYAGKTKYWIFVLKTRDPARSSIPIKRATRPTYATDTKSASRARPHLQGYIEMINRKTMIQMKHDINPRCKWLPRGGTALEAATYAKKDNTGIYEDGVLSKSDQGKRNDMAEIFKMIENGADEADICRKYPGQFIRYHAGITKAISLQFQKRVGDIEIYYIYGKTGSGKTSSVVKKEGEALYHTYDQDLRWFDGYKPSRHSAILIDEFNGSQKAVFYNKILDRYTPWVEVKGAKLRITAKRIYICSNYKLKEVANTQGWSPEELEQFKRRVTKFIHVERLPGAPPVDIWAPLVPQAAEPTTPVRPQHPHGWRQRRRATPPTCADSACSGAPAGSRHSMRVTNAPRSGILCSRSRNR	CRESS3	CRESS3(circolike)|CRESS3(circolike)	0.19
KU043398	Unidentified circular ssDNA virus isolate 8412	MTAEVSCGSALCKTKRVEVADVNEDGSIQNPTIQEEANELSKKYGKKSIRTVTGTFWCDTQEKRQAEFERVKGVWPTSRYILYGPLELTEENKKPHLHFIIAFASSKMFKTIIKTLKSSEYHIESCRNFHAAVEYCLKNDPNDKLEYGEPLKQGLRNDLKKTLESSHYDVKEIQENNPDLYVRYRSGIEKICESKMRENNTLDWLNLTQDEEGNIKDKEYTPTRVHWFFGPTGTGKSRTVKKVVGDKVKKGVIKPDEITIINCFTSAGFAIGMINYKSKILILDEFRGDCIKFSELLKIIDGTTINIKGSEVYLHLEDIYVTSCFGPNEVYKNLGQTDSIKQLYRRLTECKHMMNGKVVDVEYEYDDSPWGNTCPRTFRPAVMNSLLTYN	unclassified	und|und(circolike)	0.19
KU043405	Unidentified circular ssDNA virus isolate cg_1242	MTTVDVYGVSTIGNTIDADFNEDGTIQNPTILAEAEELKDRFKGKKSVKTIMATFWCDSEDIRHAEFERIVEVWPSVKYVLFGPIEYTEENKKPHLHLIVAFASSKMFKTIIKTLKPEFYHLEPCRNFKSAVEYCLKSNPSDKLEYGTPLKQGLRTDLKETLKANDFNILNIQENNPDLYVRYRSGLEKVCESHNDEKNVLDWLNLEENEDGEIQKKEYKKTVVHWFFGPTGAGKTKLIKQILSERVLKGELKASEISIIDKFSQSGFAIGAIKPDSKILVLDEFRGSTVKFSELLQIIDGKNLDIKGGKIYLHVNEIFVSSCYNPYNVYSNLNKNDSVDQLIRRITDCKNILYDRVEDVDLNKNFVEYDENEIFV	unclassified	und|und(circolike)	0.29
KM821766	Sewage-associated circular DNA virus-31 isolat SaCV-31_NZ-BS4358-2012	MYDIEELAEEPSKGKRSVGPKVMRWCVTWNNPNVTGDEVAERLNASDKVKGYVFQLEKGESGTPHFQMYIEFTGQVYAAGVRKTIKHEGVSTFRCNGTKAQNVKYCTKDDDRLGGPWIHGTCANESAGQGKRSDLDDFAKEVIVAGGVNVELIEKYGGCAVRYTKQAQFMMQQIQFEKAAAVDRAYWKEQVRLKAAGLPYGQKPRKLVLYFGPSAVGKTTEAKIRCESEYDEAPYMKQGTTKWWCGHNLEKCVIVDEWQIGMTGTLESFNDLTNFGTHRAETKGGQTPIIAECMMFTSNRHPIDIFKTKWGDARYRALARRFEEVHWWNDNKQLSILKNPGKEPVYMGDEPSEEWLQWNVCNSDWEYFWRGRTLREGDQIIHHTDGRVEEIINSYFTW	unclassified	und(AlphaNanoSmacolike)|und(circolike)	0.11
KM598412	Odonata-associated circula virus-10	MLFGVCFTFNNWSAETKKACQKAIGQAGILYIIWGEEVGEEGTPHLQGYIQCNQDKYKRLMRVIGTCHMEKQKGTSDEARDYCKKDGIWQEHGIYKFIDAPKKRQGERSDLILVKKSIDEGMSYDDICEKHFAIVGKYSRFIKERVQARDSKTQETELQEQFVNSSLRPWQQKLLDITATEACPRKIHWIWEDKGNVGKSFMTTYLGVMKGSALLTAGKKADMAYIYAQKPSKIVCFDLARTNEEYLDGVYSLAEDLKNGRVVSTKYESKTAFFKPPHVFVFANFLPNMKKWSAYRYNIIDLNRPLIKLPILPIVLCIDCARCDVVCIQSTIQVRPDYPHNHRIVY	unclassified	CRESS5(AlphaNanoSmacolike)|und(AlphaNanoSmacolike)	0.11
KR528568	Palaemonetes sp. commo grass shrimp associated circular virus].	MAAKRDSAVKRWCFTLNNYTDADCEALKEKLTTDTCSRAIVGKEKGENGTPHLQGFVSLKTRKRLSAMKTFLSPRYHFEQAKGTDEQNTEYCSKEGDVLIDVGENVKGRGDKGGGFNEGANIKRVVYHLLEGKDKEALLQDEKMLGAYMKYKRSITEMVSEVKSEQETKRLKQDLDNATLRPWQRELKEYLTGDPHDRHIIWYIDGQGNNGKSWFAKYCVAELGAIRLENAKTADLTHAYNGERVVIFDLSRTTEGHFNYGALESIKNGCVFSSKYDSRQKMFPIPHVIVFANWGPDRSKLSEDRWVTKTWSFEQETFQTF	CRESS4	-	0.22
KF738884	Dragonfly larvae associate circular virus-10	MPKVKQGSQARRWCFTLNNYTEKDVTSITEKLTFSNCVFAKVGKEVGDSGTPHLQGFIHLRKRLRLACVKKLVGDRAHCEVARGTDKDNESYCGKDADVVLTVGEPTIGTTEQGGGDTIHSIARRIALKLSKGTDITELQGEEWKAYCRHSKVIQELSAAFVKNKNIADQAAQMSGKPLRQWQKELKDAIQTVPNDREIMWYCDSVGNTGKTWFSKYLVALHGAIRFENGKSADIKYAYNGERVVVFDLSRSQVDHFNYEVIESIKNGLMFSPKYTSCTKMYPIPHVIVFANWMPDESKLSADRWNIQSLSDVSKIKCEKEDDVIVNDVIVIEDDDVQPEQIDSYFSSLFDDWGPDMVGDLDEYQ	CRESS4	-	0.23
KR528548	Littorina sp. associated circular virus isolate I0041	MPAKRVYQGKRGKRWCFTLNNYTEAEKDVVVAGLIGKEPVFAKVGAEVGDSGTPHLQGFVHLKERESLGGVKKILGNRCHLEMARGTDIENDEYVSKGSIVVELGAPVEGATEKGGGDTGYIMARAAAQQLADGGDLCAIAEDPELWKSYCQHGRAIEKLAEATRKSKQHQLAADSLGDPILQAWQRTLLRHVLGEPDMRKIHWMYDLVGNMGKTWMSKYLCAKHGAVRFENGKSADIKYAYNGERIVIFDLSRSQEDHFNYEVLESVKNGIMFSPKFDSKMKVFAVPHVLVFANWGPEESKLSRDRWDVKCMTDQDMEWSDLASNVIVKQEGHNVLIDMTGDREADTQVMDWNSTDDSDCFIVQY	CRESS4	CRESS4(AlphaNanoSmacolike)|CRESS4(AlphaNanoSmacolike)	0.19
JX908739	Cyanoramphus nest associated circular X DNA virus	MNFQRKRWCFTVNNYTEDEFNSIKQNFCERVAKFAVMGREIGSGGVPHLQGFISLQNKVRLTGIKAIVGQRAHVEPAKGTDQKNLEYCTKSCGVDGATIYGVPAGGVTEKGGGTPLSRRALECVRKRSAGTSISELLDDDTLAPAYIVHKRAIEECASDIAGAQQFQAERARYATTRWKPFQFNILKICMQEPHPRAVHWFWDAEGNTGKTFIAKYLVLLHDAVRFENGKSADIKYAYKGQRIVIFDFSRSQTDHINYEVMESVKNGIVFSPKYESGMKVFRTPHMICFANERPDTSNMSMDRWEIHEITTRQARTPTTLPDRDSDTHEIA	CRESS4	-	0.22
KT732818	Pacific flying fox faeces associated circular DNA virus-3	MPKRIRQPRRRRWVFTLNNFTEEELTTIKNILTDLAPTYAIIGKEVGECGTPHLQGFVSLKKQISFTAMKSLIGTRAHIEAANGTDVDNQLYCSKQDADAWQLGEPRQSVTGRGGNALDYRGVLEALQSGSTVTEIVKNPDLVVPLIIQHRNLRQVLLDLKKEKELEKLRTAYKNVTLRPFQEELVNILSSDPDSRAVYWYYDQYGNTGKTWFSKYLVARMDALRLENGKTADLKHAYEGQKIVIFDFSRSTMERINYECIEAIKNGLVFSGKYESTSKIFPVPHVVCFANCPPDTSKLSYDRWRIRCIDEINISVGGTYQMRWVRGGSRLRRSRPAFLI	CRESS4	CRESS4(AlphaNanoSmacolike)|CRESS4(AlphaNanoSmacolike)	0.19
KP153409	Lake Sarah-associated circular virus-11	MAPRGNAAKRWTFTINNWTLADYDKVLEFTTKFEPVFLICGKERGELLTDHLQGFVHLKSKQRLTFLKANLSERAHFECAKGSDEDNRDYCSKEDTEPFIFGTPVKSCSEKGGGRITAQQVIGAAIALATEREPFLVIKKNEEFAVPVLRHYASFEKLAASVRRLNALEQLQSEYKEVRLKVWQQAIINTIQERPHPRTIHWYWEATGGTGKTWMSKYLVACHSAFRAENGKSNDIKYAYAGEKVVIFDFTRSQTEHINYEIIESIKNGCYFNCKYESGMRIFPTPHVFCFSNSPPDLSKMSADRWHISQIRGLLLSWSVPLPIPGTRTVDESSVCETSSEEGGEESFNLFEYLDATKT	CRESS4	-	0.19
KX388505	Cruciviridae sp. isolate CRUV-26-F	MDAPKIDEPKNEIVYKYDRARRWAFTFHNYTDENVEYLKNIPADKADFIIFGFELTKEGIPHLQGYVEFGTALVRNTVKARLDPFSKKKSPINVSNAQKTREANINYCSKIESKDEVAIAKYECSFITKTNKERHQGERTDWHLVKDLAYEKQDISEIDEAFPEYAIKYRFAIKDMIETAKAKQVRADFEEQYESAELRPWQSKLVDELKYPPNDRKIIWIWENQGNIGKSWLSCYLVAKHGAIRFENAATKDIAHAYNGEGIVVFDFSRTTEERLNYQILESIKNKVLFSPKYNSCSKYFKSPHVICLANWPPNRATMSQDRWDVRHMKDTIVGLTNSEPCKTIDELPSCNTELVPNSKGDGQIIEQLEDEIIMYSEQLSTLQDEEPQNSVKIDEIES…	unclassified	-	0.27
JX904144	uncultured marine virus; Strait of Georgia, British Columbia, Canada	MDEKKNHGSKKYTAICFTINNHDEDWESDMERLFNEGYFTYLVVGEETGESGTDHLQGYGELKKRTRLGAIKRFSNDFKRAHVESRRGTGEQAAVYCKKDDAWREWGEMKLSAQGKRSDLDKLREMVGEGEYNMLNIMNDCDAAFKYPQAVRTYVALFKKAKRTRMELTLKPWQDSLNGTLTTTVPDQRKVLWFWEATGGTGKTTMARYLVRNHGAFYCNGGKTTDIAYAYEEEKIVVFDFTRSQEEHINYGVIESLKNGMITSNKYQSCTKVFDIPHVVVFANFEPDYEKLSQDRWEVKEII	unclassified	NanoviridaeAlphasatellitidae(AlphaNanoSmacolike)|und(AlphaNanoSmacolike)	0.07
AJ749894	Faba bean necrotic stunt virus	MARQVICWCFTLNNPLSPIFLHESMKYLVYQTEQGESGNIHFQGYIEMKKRTSLAGMKRLIPGAHFEKRRGTQGEARAYAMKEESRIEGPWEFGEFIASVEDKLREVMNDMKNTGKRPIEYIEECCNTYDKSASTLREFRGELKKKKAIATWELQRKPWMDEVDALLQERDGRRIIWVYGPQGGEGKTSYAKHLVKTRDAFYSTGGKTADIAFAWDHQELVLFDFPRSFEEYVNYGVIEQLKNGIIQSGKYQSVIKYSDYVEVIVFANFTPRSGMFSDDRIVFVYA	NanoviridaeAlphasatellitidae	-	0.23
HE654123	Faba bean yellow leaf virus isolate Eth-231	MARQVICWCFTLNNPLSPLSLHESMKYLVYQTEQGDSGNIHFQGYIEMKKRTSLAGMKKLIPGAHFEKKKGTQGQARAYAMKEDTRVEGPWEYGEFIPTIEDKLRDVMQDMKNTGKRPIEYIEECCDTYDKSASTLREYRGELKKKQAIASWELQRKPWMDEVDAMLEERDGRRIIWVYGPLGGEGKTSYAKHLVKTRDAFYSTGGNTADIAFAWDHQELVLFDFPRSFEEYVNYGAIEQLKNGIIQSGKYQSVIKYTDYVEVIVFANFTPRSGMFSDDRIVFVYA	NanoviridaeAlphasatellitidae	-	0.31
KM607601	Banana bunchy top virus isolate 548_BI_1995	MIIDDRMARYVVCWMFTINNPTTLPVMRDEIKYMVYQVERGQEGTRHVQGYVEMKRRSSLKQMRSFFPGAHLEKRKGSQEEARSYCMKEDTRIEGPFEFGAFKLSCNDNLFDVIQDMRETHKRPLEYLYDCPNTFDRSKDTLYRVQSEMNKTKAMNSWRTSFSAWTSEVENIMAQPCHRRIIWVYGPNGGEGKTTYAKHLMKTRNAFYSPGGKSLDICRLYNYEDIVIFDIPRCKEDYLNYGLLEEFKNGIIQSGKYEPVLKIVEYVEVIVMANFLPKEGIFSEDRIKLVSC	NanoviridaeAlphasatellitidae	-	0.27
JF957636	Banana bunchy top virus isolate TOS28 segment R	MARYVVCWMFTINNPTTLPVMRDEIKYMVYQVERGQEGTRHVQGYVEMKRRSSLKQMRVFFPGAHLEKRKGSQEEARSYCMKEDTRIEGPFEFGAFKLSCNDNLFDVIQDMRETQKRPLEYLYDCPNTFDRSKDTLYRVQAEMNKTRAMNSWRTSFSAWTSEVENIMAQPCHRRIIWVYGPNGGEGKTTYAKHLMKTKNAFYSPGGKSLDICRLYNYEDIVIFDIPRCKEDYLNYGLLEEFKNGIIQSGKYEPVLKIVEYVEVIVMANFLPKEGIFSEDRIKLVSC	NanoviridaeAlphasatellitidae	-	0.31
KJ547621	Sewage-associated circular DNA virus-10	MSQNLESGRREALKMRAWCFTHNNFPYAAADLPLCKDERYVVWQHEKVDTDHIQGYIELSKPQRISAMIKWLPGAHFEERRGTPDQARKYCMEEDTRVEGPWERGSYGTTQGKRSDIDVVREAIAAGADRREVYNAHSDIAAKYPRYVETMLRFAKEDAVDKILVFEPRQGFQTDLLDMISGPADSRSIHWVYDRVGNNGKTYFAKYLVDKFGAFYTNGGKSVDLAYAYGGESIVIFDYVRDAEEYVGYGVIEQLKNGIAMSTKYESITKRFNIPHVIVLANFKPQEGKFSSDRIKMINVT	unclassified	-	0.26
L32166	Banana bunchy top virus	MSSPSLKWCFTLNYSSAAERENFLSLLKEEDVHYAVVGDEVAPATGQKHLQGYLSLKKRIRLGGLKKKYGSRAHWEIARGTDEENSKYCSKETLILELGFPVVNGSNKRKISEMVARSPDRMKIEQPEIFHRYQSVNKLKKFKEEFVHPCLDRPWQIQLTEAIDEEPDDRSIIWVYGPYGNEGKSTYAKSLIKKDWFYTRGGKKENILFSYVDEGSDKHIVFDIPRCNQDYLNYDVIEALKDRVIESTKYKPIKIVELGKIHVIVMANFMPDFCKISEDRIKIIYC	NanoviridaeAlphasatellitidae	-	0.41
EU430730	Banana bunchy top virus	MSASRWTFTLHYSDATERGKFLATLKEEDVHYAVVGDETAPNTGRKHLQGYLSLKKRFRISGIKKKYSSRAHWEKARGSDYDNKAYCSKEALILELGVPCQTGSNKRKLADMVTRSPERMKIEQPEIFHRYASVKKMKEFKERYVYPILDRPWQVQLTELIEAEPDDRTIIWVFGPKGNEGKSTYAKSLIQKDWFYTRGGKKENILFAYVDEGSTKNVVFDLPRTVQEFINYDVIEALKDRVIESTKYKPVKYLELNTVHVLVMANFLPDMCKISEDRIKIVAC	NanoviridaeAlphasatellitidae	-	0.48
LC019722	Cardamom bushy dwarf virus	MGLGPRTIRAQNDCVTKTEGIFHVSILYLRYTIYSFGGRKRPSITRFLTPLPYTSAKHVMASNKWCFTLNYSDAAERDIFLATLKEEELRYAVVGDEVAPTTGQKHLQGYLSLRKLIRLGGLKKRFSPKAHWEMAKGSDEDNARYCSKETLILQLGIPTSQGSNTRSPERMRIEQPEIFHRYESVKKATIFKDEYQHPSLDRQWQIQLTEAIAEEADDRTIIWVYGPNGNEGKSTYAKSLMKKDWFYTRGGKKENILFSYVDEGSTKHVVFDIPRCHQEYLNYDVIEAIKDRVIESTKYKPIKIIEVNRVHVIVMANFMPDYCKISEDRIKTINC	NanoviridaeAlphasatellitidae		0.17
L32167	Banana bunchy top virus	MSSFKWCFTLNYSSAAEREDFLALLKEEDVHYSVVGDEVAPATGQKHLQGYLSLKKSIRLGGLKKKYGSRAHWEIAKGSDEQNRRYCSKETLVLELGTPVVPGSKKRKLLDRFRESPEELKMDDPSKYRRCLAVESIKDARINSEWVHELKEWQNKLIQHIEGVPDDRSIIWVYGPNGGEGKSTFARYLSLKPGWGYINGGKTSDMMHIITMDPDNHWIIDIPRSHSDYLNYGVIEQIKNRVLINTKYEPCVIRKDGQNVHVIVMANVLPDYCKISEDRIKIINC	NanoviridaeAlphasatellitidae	-	0.52
X80879	Faba bean necrotic yellows C1 alphasatellite	MACSNWVFTRNFQGALPLLSFDERVQYAVWQHERGTHDHIQGVIQLKKKARFSTVKEIIGGNPHVEKMKGTIEEASAYVQKEETRVAGPWSYGDLLKRGSHRRKTMERYLEDPEEMQLKDPDTALRCNAKRLKEDFMKEKTKLQLRPWQKELHDLILTEPDDRTIIWVYGPDGGEGKSMFAKELIKYGWFYTAGGKTQDILYMYAQDPERNIAFDVPRCSSEMMNYQAMEMMKNRCFASTKYRSVDLCCNKNVHLVVFANVAYDPTKISEDRIVIINC	NanoviridaeAlphasatellitidae	-	0.72
KC978991	Faba bean necrotic stunt alphasatellite 1	MACANWVFTRNFQGALPSLSFDERVQYAVWQHERGTHDHIQGVIQLKKKARFSTVKEIIGGNPHVEKMKGTIEEASAYVQKEETRVAGPWSYGDLLKRGSHRRKTMERYLEDPEEMKLKDPDVALRCNAKRLKEDYCSCFSSFKLRPWQIELHRVLMNEPDDRSIIWVYGPDGGEGKSTFAKELIKYGWFYTAGGKTQDVLYMYAQDPERNIAFDVPRCSSEMMNYQAMEMMKNRCFASTKYRSIDLCVRKNVFLVVFANVEPDPTKISGDRIVIINC	NanoviridaeAlphasatellitidae	-	0.75
AB000921	Milk vetch dwarf C2 alphasatellite	MASKRWCFTLNYKTALERETFISLFSRDELNYFVCGDEIAPTTGQKHLQGYVSMKKLIRLGGLKKKFGSIAHWEIAKGDDFQNRDYCTKETLIAEIGAPVKKGSNRRKIMEIYEEDPEEMKLRDPDTALRCKAKKLREEYCSEVSVFSLRPWQIELHRALMEVPDDRTIIWAYGPDGGEGKSTFAKELIKYGWFYTAGGKTQDILYMYAQDPERNIAFDVPRCSSEMMNYQAMEMMKNRVFASTKYRPVDLCIRKKVHLIVFANVAPDPTKLSEDRIVIINC	NanoviridaeAlphasatellitidae	-	0.59
AB000920	Milk vetch dwarf C1 alphasatellite	MPTLQGTFWCFTLNFSGDAPSLSFNERVQYACWQHERVSHDHLQGYIQMKKRSTLKMMKELLPGAHLEVSKGTPEEASDYAMKEETRVAGPWTYGELLKKGSNKRKLLDRYKENPEDMELEDPAKARRCRAKIDKEKFIAEFKVEDDEQEWKKILEKEIEKIASPRSILWVYGPQGGEGKTSKAKELITRGWFYTRGGKKDDVAYSYVEDPTRHVVFDIPRDMQEYCNYSLIEMLKDRIIISNKYEPITNCQVYNIHVIVMANFLPDVTKISEDRIKIIYC	NanoviridaeAlphasatellitidae	-	0.77
U16735	Subterranean clover stunt C6 alphasatellite	MPTRQSTSWVFTLNFEGEIPILPFNESVQYACWQHERVGHDHLQGFIQFKSRNTTLRQAKYIFNGLNPHLEIARDVEKAQLYAMKEDSRVAGPWEYGLFIKRGSHKRKLMERFEEDGEEMKIADPSLYRRCLSRKMAEEQRCSSEWNYDLRPWQEEVMHLLEEEPDYRTIIWVYGPAGNEGKSTFARHLSLKDGWGYLPGGKTQDMMHLVTAEPKNNWVFDIPRVSSEYVNYGVIEQVKNRVMVNTKYEPCVMRDDNHPVHVIVFANVLPDLGKLSEDRIKLIRC	NanoviridaeAlphasatellitidae	-	0.79
KC979052	Pea necrotic yellow dwarf alphasatellite 3 isolat Gross-Enzersdorf_1	MPSQKSTYWVFTLNFKGEIPILSLDTRVQYALWQHEYVSHHHLQGFIQMKAQSTLGQMKALIPGAHFEVMKALDSDQARSYAMKEDSRLEGPWEYGLYIKKGSHKRKVMERFDSEPEEMKVEDPSLYRRCLSRKMTEEQRSSSTWDYDLRPWQDSILEAIQLPPNYRDVLWVYGPNGGEGKSTFARHLSLKDGWGYLPGGKTQDMMHLITAEPKNNWVFDIPRVSSDYINYGVIEQVKNRVMVNTKYEPVIMRDDNNPVHVIVFANCLPDVTKLSEDRIKMIYC	NanoviridaeAlphasatellitidae	-	0.75
KF471057	Radish leaf curl alphasatellite clone VIRO 386	MPTIQSQWWCFTVFFLSATAPDLVPLFENTHVSYACWQEEESPTTRRRHLQGYLQLKGKRSLAQVKALFGDLNPHLEKQRARKTDEACDYCMKEETRVSGPFEFGDYCPSGSHKRRQRESVIRSPVRMAEENPSLFRRVKAKIAEEEFQKTAREIQILNLKSWQSRLQTLLERAPDDRTIFWVYGPTGGEGKSTFARDLYRSGTWFYTRGGSADNVSYQYIGQLGNNIVFDIPRDKKDYLQYSLIEMFKDRLIVSNKYEPLMAPLINCIHVVVMSNFMPDFEKISQDRVHVIPCRPCGVCLKHHIIEMKCEDYID	NanoviridaeAlphasatellitidae	-	0.68
JX458742	Dragonfly-associated alphasatellite isolate PR_NZ48_2009	MGSFSSPRSRWWCFTLNFSGDPPELAWWLARDEIKYACWQHEKGTHDHMQGYLQLKKPSRLTAVRKLFGNFRPHLEVQKARRAEDARDYCMKDESRVAGPWEIGEFIPQGSHKGRMRDLVRRSPERMAEENPSVYRRVLAAQSVERFRSDPSLLPDPLRDWQICLLELLEEVPDNRSIIWIYGPAGAEGKTMMAKELFRRGWFYTSGGTADNVKYQYAVEVESHVVFDIPRDKKDYIQYSLIEELKNGMIVSNKYEPIRVVRISGREVHVVVMCNFMPDYSKISPDRIVIVYCRKCPSCETCLCIGC	NanoviridaeAlphasatellitidae	-	0.68
HE806451	Cuban alphasatellite 1	MAKSRNYCFTLFSYVLPLFNSLPDWANYLVFQEEESPSTGRRHIQGYVNLKSPQSFSFLKKKLGDGVHLEQARGSASCNRDYCRKTDSRVSGPWEFGILAEQGSKKRKTMESFQEDPEELRLSDPKLYRRCLATRVNTEFAGLVLPVLDRPWQLLVEKVLDEGPDDRTIIWVYGSQGNEGKTTWAKSKVQAGWFYSRGGKGENIKYSYAEHLGHAVFDIPRQVEDVLQYTVLEEIKDRLIRSSKYEPIDFNCSDQVHVVVLSNFLPQLDSEHDSRGNLIKKQMLSRDRVVIVNIAESLIVRDNETVSFHEYME	NanoviridaeAlphasatellitidae	-	0.7
HM163578	Melon chlorotic mosaic virus-associated alphasatellite isolat 2009-02-04-06	MTSQSRNWCFTLFSYVLPLFSSLPEWAEYLVFQEEQCSSTGRKHIQGFVTLKRSQRLSFLKNKLGDGVHLEIAKGSASSNRDYCTKDDTRSSGPWEFGVLAEQGSRKRKTMESFQEDPEEMRLSDPKLYRRCLATRVNKEFSGLVLPVLDRPWQLLAEKVLNEGPDDRTIIWVYGSQGNEGKTTWAKSKIQAGWFYSRGGKGENIKYSYADHLGHAVFDLPRQVEDVLQYTVLEEIKDRLIRSSKYEPIDFNCSDRVHVVVLSNFLPQLDLEYDSRGNLVKKQMLSRDRVVIINIDESVIVRDDETVSFHEYME	NanoviridaeAlphasatellitidae	-	0.7
KT948075	Cucurbit yellow mosaic alphasatellite	MSHSRNWCFTIFNYVLPLFTTLPEWANYLIYQEEECPTTKKRHIQGYVNLKRNQRFAFLKKKLPDGTHIEACKGSSSSNRDYCRKDDTRTDGPWEFGVFAETGSNKRKTMERFQEDPEELRLADPKLYRRCLATKVNTEFGGLVLPVPDRPWQLVAQKVLDQGPDDRTIIWVYGSEGNEGKTTWAKTKIQDGWFYSRGGKGENIKYQYAEHLGHCIFDIPRQVEDNLQYTVLEEIKDRLIRSSKYEPIDFNCSDKVHVVVLSNFLPCLDSEYNNRGELVKKPLLSRDRVFLINIDESVCGHPDDLTAFDLYLSPE	NanoviridaeAlphasatellitidae	-	0.75
KT099170	Alphasatellite 1	MSQQRNWCFTLFNYVLPLFSVLPPWANYIVYQEEICPDTSRKHIQGFINLKRPQRFSFLKKNLPDGAHIESCKGSASSNRDYCTKDASRFAGPWEFGVFAESGSNKRKTMERFQDDPEELRLADPKLYRRCLATKVNFEFSSVVLPVFDRPWQLLVEKILNEGIDDRTIIWVYGSQGNEGKTTWAKKKVQDAWFYSRGGKGENIKYQYVEHLGNCIFDIPRQVEDNLQYTVLEEIKDRLIRSSKYEPIDVNSRDNVHVVVLSNFLPQLDVEYDSRGNVVKRQLLSRDRLCIVNIDDGTVTRDNSVISFHDFLE	NanoviridaeAlphasatellitidae	-	0.67
KR134323	Temperate fruit decay-associated virus isolate MFB25	MAPNLISRNFVFTINNPTFNPDDLFVGEPPEWVRCAIWQLEEGEQGTQHIQGYIEFTKAIRASRFCQIINGDNPHLEVRRGSRDQAYNYCSKEETRVSGPYTYGSWKLCKGRRTDIEAATTAILEQDADDDELLHNHSGVMAKYPKFVKFLREHKRRKINSEIVFPHELHPWQISLISYLEDEPIPRKIKWFVDERGGSGKSTFAKHMARHGAFYTRGGKTPDVAFAFREHLSSNPHSTIVIFDFTRSGKDYVNYDILEQIKDGIVVSNKYESTTIISPVQHCIVFANWEPNKESLSLDRWDIVHLNHNMNDMN	unclassified	und(AlphaNanoSmacolike)|und(AlphaNanoSmacolike)	0.08
KX388506	Cruciviridae sp. isolate CRUV-27-B	LKKLTEADCKIIIFGKELTKSGLPHLQGYIEVYNAKRIAGIKKLLDPLKGPQSEIHVEPRKPKATRTHNINYCSKGLQSHEEYVEYNEGFNHLYGDPNDNESKTHNWGPNYGLNADIYKQIFKEERENQGERSDWNILYERIVEEPKFSTVLKEFPEKAIKYPGGIQKAIDCVLNERNNSRLANEMNNLKLYQWESLLNEELINTPDKRKIIWYVDPIGGSGKSTFGKYLLAQGDCAYFTNAKTSDIAHAYNGERIAIFDFTRSVDGRINYEVIESIKNGVVFSAKYNSGLKVHATPHIVCFSNFDPDQSKLSQDRWDIRPLTPEDRKYPEPIEPLTAPIETNQTITNAIHELEDNIADDIPVIVNEIATQPIEIGEAVDITSDTPSSSRGNTDSQVNK…	unclassified	und(AlphaNanoSmacolike)|und(AlphaNanoSmacolike)	0.15
KM821769	Sewage-associated circular DNA virus-34 isolat SaCV-34_NZ-BS4221-2012	MSKPLRNICFTSFNLDIEWFETEWPSHHLPGEETGMVQYIIVQGEFCKEGKKHIQGYAQLRGQYYLKKIKEFFGDNGLHVEPRRGTHEQARDYCKQEKNGRWHDYVEMGDQKKPGSRTDLLDVIDKIKEGETIASIISNSRDPKMVRNAVVYNRTLTAIEKQFKYDAAIKEAIKEYDGVTWRKWQEELLCYVDKDADKRKVRWYTDMGGNTGKSYITTYLTLLGKAYVVSGGKQADILYAYEDQPIVIYDLARAYEQNMDHIYVTMEYFKNGRFLSTKYESKMRVFKRPHVIVMANFPPHINKLSEDRWDIVYMTNP	unclassified	und(AlphaNanoSmacolike)|und(AlphaNanoSmacolike)	0.07
KM874360	Avon-Heathcote Estuary associated circular virus 27 isolat AHEaCV-27-NZ-2332TU-2012	MPAKQAFNMPFTAFDVEDIEWKPDHMKYLLYGRETCPSTGREHLQGYVQFIKKQTIAGAKKIFDNATIHFEFALGDYEENFKYCTKTRVNDMVPNVYFERGEPTRKKGQRNDIQEVIRRIESGNDLRDLMFDDEVNQTVARCMPFVRQAIADFKAGKGLSAIKSKLESAQLRSWQHGVKSLVEQEPEGRSVYWYWDTKGNTGKSFMVDWLVAFHKAVVFTHGKMHDIAHAYNHEKVVCFDLSRTQEEKLDAVYMALECFKNGRMFSGKYESTTKIFEVPHVFVFANFAPDKTKLSEDRWKVTEIISF	unclassified	und(AlphaNanoSmacolike)|und(AlphaNanoSmacolike)	0
JX904231	Uncultured marine virus clone GOM00443	LKREFIFQTCLILMAFQKVFHPASSSSTSEDDSSTQTVTRAPTRTSHIAISGDSGGSTAARNSGASAAATQTHGSGGRAKNWCFTLNNYTDDEEQCIGDFSENDHLLYMIVGREKGDSGTPHLQGYLSLNRRFTLSQIKGWLGSRVHLEVARGSPQQNRDYCTKEGDYDEYGILPRTTQGKRNDFICYQQWVVSLDRMPTMHEIAREWPGLFARYSDRLRTIAEASLPPIDLLGDSYELRPWQAELASSLEDPPDPREVMFFVDSDGGKGKSYFCQWLLSKSTDGQVLRIGKRDDLAYAIDETKKIFVFDIPRTQMEYLQYSVLEMLKDRMVFSAKYQSATKILRQSPHVIVFSNEYPDMSKMSDDRYNIKEL	CRESS5	-	0.42
KR528545	Aiptasia sp. sea anemone associated circular virus	MPTFQSARWCFTVNNPTDADASAIAELGDGPLTRYLVVGREIGESGTRHLQGFVIFHQVQSRAAVSGYIARAHLEPARASSVQASDYCKKDGDFDEYGVCPRSGQRFDLQALLKWGDDFIASHKRAPTAHECAVEQPAAYLKYPRLISLFQARAPPPDFGREGERRPWQHELEDELEGRCENDRRVTFIVDQVGGAGKTWFQQWFLSKNPARAQIVSIGKRDDVAHTIDETKEVFFFAVPRGQMEFLRYEILEMLKDRMVFSPKYASRMKFLSVVPHVIVFSNELPDMNKMSLDRYYIKEVN	CRESS5	-	0.42
KR528554	Marine snail associated circular virus isolate I0084	MAHRQHAAKRWVFTINNWTAAEQQALIDSSDNFDYLCFGRERGDNNTPHLQGYVILKTKLRLNNVKALPGFRRCHLEVSRGTPQQAADYCKKDGDFEEFGELPKGQGKRSDFENLKEWIKSLDHWPDDHEIAEEYPSLWGRYRSACESFRQLFGKPIEVVDPTTFEPRVWQQRIIDICNGEPDPRKVYFVVDENGNTGKSYLSAYLISKFPDEVQILSVGRRDDLAHAINPRRSIFLFDVPRGGMEYLQYTIFEQLKNRTVFSPKYNSITKILRKLPHVIIFSNESPDRNKMSHDRYHVTHIRQFPRADDNGANG	CRESS5	-	0.36
KR528556	Hermit crab associated circular virus isolate I0085A5	MPRDAPAKQWCFTLNNYTPAELTAIVDSAGNFDYLCFGRERGNNNTPHLQGYLILKEKKRFSYVRQLAGLERAHWEKKSPRSTPKQASDYCKKDGDYDEYGELPTKKQGQRTDFDELKEWIKEQDHRPTDREVAEEFPSLWGRYRSACISFLDLFSPHPTLVQGTLRPWQEDLNTRLSAPPNDRDVMFVVDENGNSGKSWFIRYLMTERPDDVQMLSIGKRDDLAHAIDPAKKIFFFDVPRGGMEFMQYAVLEQLKNRLVFSPKYESRMKVLHHIPHVVVFCNEEPDRTKLSRDRFRVTHIRQV	CRESS5	-	0.5
KM874354	Avon-Heathcote Estuary associated circular virus 24 isolat AHEaCV-24-NZ-2183TU-2913	MAQSRSWCFTLNNYVQADIDRLAAFGETDDCTYLVFGKEVGESGTPHLQGFAIFPRKLRLRAVKSHIGNGAHLECARGSPLQASDYCKKDGDFTEFGSFGGVRPGLSGRFGQFVEWLDEHYKEGNVHQPSRALIAATWPDLYVRYHTKLFELVGVLAPKPILQEGDPNAWQTTLIEALGLDPDDRKIYFYVDETGGSGKSWLTRYLMTSRDDVQALSIGKRDDIAHAIDVTKKVFLFNVPRTQMEFLQYSILESLKDRMVMSPKYNSMMKVLHSVPHVVVFSNEEPDRTKLTADRFAVTHIRNI	CRESS5	-	0.5
KR528561	Gammarus sp. amphipod associated circular virus	MTSCRYCFTVNNPTVQDRERLDLLADSCNYLVYGNEIGSSGTPHLQGFVIFPKTKRFNAAKIAIGNTAHVECARGSSVQAATYCKKDGDFREFGELPSSQGKRTDWDIYRDWVTDLGRVPSKKELVLAFPGFYARYRKACFEYAEALTPPPILTQSEPRFGWQTRVDGIINGEANDRTIHFVVDPEGNAGKTWFCSYALTKWPDKVQVMRIGKRDDLAYAISTEKSIFLMDVPRNQMTFLQYSVLEMLKDRMIFSPKYESSFKILQYVPHVIVFSNEQPDTSALSADRINIINV	CRESS5	-	0.41
KR528551	Palaemonetes intermedius brackish grass shrimp associated circular	MNIRPAAVKRWVATVNNPTQQESQTLRDAIEAQTSYAVIGREVGESGTPHLQCFFIFNNRLRLRQVKAVPGLQRAHLEPARGTSAQAANYCKKDGDFDEYGELPNSGPKTTIFEAFRDWYKDQPGVVTERDILDHHPSILRYPHFIEVCHRQYGRRPTLVEGQLRNWQLELSNMLDEEPDDRKICFVVDEEGNKGKSWLTAYWYSNRSDVQMLSIGKRDDLTYAIDVSKRVFVFDINRGQMEYFQYSVVESLKNRMIMSNKYKSVTKIIPHKVHVIVFCNEEPDRTAMTRDRYQMKRITPL	CRESS5	-	0.48
KR528562	Mytilus sp. clam associated circular virus isolate I0169	MSQAKRWCFTINNPTPAEEESLFLHGTNIDHPPCDFKYLVFGRETGESGTPHLQGYFELVKKLRIHQIKGTLGFERSHLEVARGTSLQASDYCKKENAFEEFGALPPPPGNAAHFAQLREWVAAQPSKPTIKDVWDVFPTLAARYNRAVMECIDLFGKKPVLVEGDLRLWQLRLDGIANQEADDRRVIFVIDPEGNKGKSWLVSYWLSTRDDTQFMSVGKRDDLAYAVDISTCLFVFDIPRGNMQYIQYGIFEQLKNRVVFSNKYSSQTKILLNTPHVFVFANELPDMNALSADRYKVINI	CRESS5	-	0.42
KJ641738	Bat circovirus isolate BtRh-CV-7/Tibet2013	MPSPQAVRWVFTLNNYSDDDIEKLSTLVPTVCSYLIYGKETCPTTLTPHLQGYLHFVKRQTLSGAKALLGNQSYHLEASKGTPEQAAAYCKKEGSFVEFGEPPKGGKRNDWHDIRDWMAALDCPPSDRDLLDKAPHLWARNRPALLKMAQLLCPPHRLVEGDPREWQERLSSLIDAEPNDRTIYFVVDPPGNNGKTWFQKWYLSKRPNDVQLLLMGKRDDMAYSVDDTKSVFMINVPRGSMEFLQYSILEMIKDRVVHSPKYESTTKFFKKKTHVIVFSNEYPLLSKMTQDRPVFINREGHIYEYDGNYPTMDQNLPPP	CRESS5	-	0.4
KR528547	Didemnum sp. Sea Squirt associated virus isolate I0026A7	MSRAKNWVYTLNNPTGDEISKAEGLFLSTPGVIYHVFGKETGDSGTFHLQGYVIFSQRKRLGQLREIFPRGHFEVSRGSPHQASDYCKKEGDFKEFGSLPPQAQGKRTDWERLREYVEQLGRRPLERDLILEFPNLVGASYNISHDLHPQKRVANGSGKPTPRIPRQPAIEFIVDPEGNSGKTWFCQYMITQHPDSVQYLRIAKRDDLTFAIDETRTIFLFDVPRGQMEFLQYNVLEQIKDRLIFSPKYSSTLKILTSNVHCVVFSNEEPDVSQLSSDRLRVVRLDDSA	CRESS5	-	0.35
KR528553	Farfantepenaeus duorarum pink shrimp associated circular virus isolate I0069	MAQAKRWVFTLNNYSGADEQLLEQLSRSTDVVTLIYGREVAPGTGTNHLQGMIIFATRKRLRQIRNYPPFQRAHLEVMRSTPARAREYCIKDGDFVEYGEPVEENRQGRRNDIHDIIAWLDLFIEENNRPPTQEEVAQLQPIAMLRYRNFMDLARLRAPQPQLIRNGVAREGWQMDLEHALDGDAPDRHILFYVDPAGGNGKTWFQQYLLTKYPRRVQILGTGNFADCAYAVDESKDIFFFNVPRGGMEFFQYRLAESLKDRLVFSTKYASGMKILHKVPHVVVFCNEAPDMTKLTADRIIIHDL	CRESS5	-	0.48
KT945163	Ctenophore-associated circular virus 2	MPSPKSTRWCFTHNNWTEPVFQQWSNLLGDEANVKFGIIGKEVGEQGTPHLQGFLILHRQQRLSWVRRHFPDGCHWSIARSDSETNRTYCKKDGDFIEFGVFPDAQGKRTDLDQFIEWLDEFESNNGRPASSPEIAKTHPKMYLRYPRSVRLAKRRCALFPVQEGDLNDWQRELEEKLGADPDDRTVLFYVDPDGGKGKTWFVRRYLTLHPNLAQALPIGQIKDMAYAVDTNARVFFVNVARSGMEFLPYRFLEMLKDRMVGSSKYESEMKIFRHNVHVVVFSNEYPDETKMTADRYDINTI	CRESS5	-	0.42
KP153451	Lake Sarah-associated circular virus-28	MSDVVETEATEENRRPVRQTASQYKAWCYTFNNYSDADVERLKGCKDGIEVHVFGKEVGDSGTPHLQGFIKFQSRKRAMFVKQLIGGNAHVEYAKFPDAAIEYCKKDQDYFEYGALIKAGKRCDIDDFKSFIATARNEKRKIYDSELREEFPKLYCRAARFMKEYRDDNRCIEPPRVLHPLYEWQSKLNSELAREPDDRSITFIIDELGNSGKSWYATYYKWNHPETTQIFRPKKVADMAYELNERVRVVFMDCARAKAGEYLQYDFLEEIKDGMVFSPKYESRTKYLSNCHVVVLMNEQPDMTKLSQDRYVIVRI	CRESS5	-	0.44
KJ547650	McMurdo Ice Shelf pond-associated circular DNA virus-5 isolat alg49-117	MSRAKHWCFTVNNYTDEDIHKLSKASLLLQPLVSSCIYQQEVPGQESATPGTPHLQGFISFKTKQSFKFTKNLVSDRAHVEVAKGTPQQNRIYCSKAKDRKIGTEVFTYGEQPKLLPGKRNDLYAFQQYVKEGNIQTRDILENHASVAARYPRYVREYIDLYVNPPEVPDHPLYLWQETLTKIITGPSDDRQIIFVVDEVGNQGKTWFAKKYCRAHEDAQFLEPGKKADMAYALNTDLRVLFLNVTRQQVEHLQYSFLEAVKDGSVWSPKYESRTKHLTQIPHIVVMMNQDPDFQLLSKDRYHTIYI	CRESS5	-	0.38
KJ547646	McMurdo Ice Shelf pond-associated circular DNA virus-1 isolat alg49-15	MSQGKHWQFTLNNPTQDERNVLAELGDQPTTQYLIYGDEVGASGTPHLQGHVSFVQRYRFNQVKNWVSPRAHLELVRLLRRHIEYCKKDGAYLEFGTPPDSTLAKDGKRNELAEFRATVAEGVFHSPELREKHPNVMARYPHFANSIIRDLFPQSAPPDLPLRAWQQRVVELIDAPPDPRKVYFIVDRQGNAGKTSLAKLLHRTHEAVQIIRSGKVADMAYLYKITTKILILDVPRSKSELLQYSFIEMVKDGLLMSTKYESVMKTFDPPHILVMMNADPDHTALSTDRYHYIIPH	CRESS5	-	0.5
JX904245	Uncultured marine virus clone GOM00546	MPKNSGGTKRQTGSHRWMFTWNNYPEDWADVIRARVEAVRVTYPQLKWIGGEEVAPTTGTKHIQGYIEFMRSGPDAKRVRPISALGLPKEVHWGDSNGKPCRGSRQDNIDYCSKEYRNVVSTFKIPKPLWVPQMRGWQLDAAELLNADSLSVGDTRSIHWFWEPNGNMGKSSFARWAVASHALEGTPEEILMVGGKAADMKHAIAGHKDKYGDYPSKIIVDIPRESLQYVSYAGLEEVKNGLFFSGKYESGMVLMNPPNMLVLANSPPEEGKWSGDRIKVHEIVSV	unclassified	und(AlphaNanoSmacolike)|und(AlphaNanoSmacolike)	0.16
KP153433	Lake Sarah-associated circular virus-19	MDDYLLKFCEVLGKKSSKSSKEILGNTDTKISKQPSPAKHYCFTLNNYSNNELNIVPTSLGSLGHYIYGFEVGAEGTPHLQGYIELHHKMRITEFKKIEGLGRAHFEKCKGSQADNLKYCRKGGNYISNYWEDVQLIVPTYYWQLDILQVIASPAHGRHIHWFWESIGGVGKSSFAKYLCSVHNAIYIDEGKKSDLINIVYNIPNITCRSIIVIDVPRDNGNTVSYKAIEQIKNGMICNTKYETGMRLFNPPHIIIFANMPPEEHKLSADRWKITEISSP	unclassified	und(AlphaNanoSmacolike)|und(AlphaNanoSmacolike)	0.07
JX904469	Uncultured marine virus clone SI00793	MANLGNNRQEGEGNTETPPSSKKQSCRKTFYAFTLFNYDENDLEANFNRQLKLYCKKYFYGREICPTTQRKHLQGFIHLKKPMRITELKNPIPGNPRLKACIGSEEQNLDYCSKDGDIVKYGYPKPLIVITDLRPWQQQIVDDIVLQPPDPRKVYWYWECVGKVGKSDFAKYLVFKHNALFCDGGKKSDLINLVFNNDMDQCNLIVWDIPRCNLGAISYAALESIKNGLVCNTKYETGTKLFNPPHIIVFANEPPSEPEKLSKDRWVITEII	unclassified	und(AlphaNanoSmacolike)|und(AlphaNanoSmacolike)	0.04
JX904416	Uncultured marine virus clone SI00142	MVTLGNHRQKGEGNTELPPLVKKQGTRHTFYAFTLFNYEQNDLEANLNRQLNLLSKKYLYGREICPSTQKKHLQGFIHLKKAMRITELKLPGNPHLEACIGSQIQNIDYCSKDNDVVSHGFPKPIEVINNLYPWQKEIEEIITNPPDPRKVYWFWEEHGNIGKSAFVKYCVVKHNALFCDGGKKSDICNLVFNNNMEECNLLIWDIPRCNLGSISYSALECIKNGLVCNTKYETGVKVFNPPHIIVFANSEPSDVSNLSADRWVIKHL	unclassified	und(AlphaNanoSmacolike)|und(AlphaNanoSmacolike)	0.15
JX904548	Uncultured marine virus clone SI03654	MISSNSSTEGGNTIPPSSPNLSKKLQISPAKRWCFTFNNYTTENISSIVPIFRSNCLCAFFSREIGSSNGTHHLQGYCEFKIKYRPVSLFKHISTTIHWEKAKGSREDNIAYCSKDGALEFHMGIPKPIKTIMPNQFFQYQTDIYDLIQTEPDDRTINWYWESEGNVGKSAFTKYLCVHHNAIILGGKGDNCLNGVLDYIKTNNIAPEIIVFDIPRSIADYVSYTAIEKIKDGCFYSGKYEGGMCVFNPPHIICFANQEPINSSMSGDRWNVVHI	unclassified	und(AlphaNanoSmacolike)|und(AlphaNanoSmacolike)	0.15
KR528558	Fiddler Crab associated circular virus isolate I0086a	MGVKLKQSQDNSEGGNNHPPSFRSRKLVFTLNNYQKEDINLIISYFESSAQKWVFGEEVGESGTPHLQGYCEFKNQKEWKQITDKCSPLKRAWSTSARGSLDDNVKYTTKDGKIYYGGFKIEKCNYKVEIDLYDWQKEIMEILEQTPDDRTIHWVWEPKGGIGKTTFQKYIFTHMGGVCVLSGKGSDMKHGVVSYINDHGETPDIVLINIPRSSAEFVSWSGIEEIKDMFFYSGKYEGGQVCGMSPHVLVFANTEPPEGVFSKDRVKTIELDS	unclassified	und(AlphaNanoSmacolike)|und(AlphaNanoSmacolike)	0.15
JX904147	Uncultured marine virus clone SOG04106	MISSNSSRDLSNIKQISPSRHWFLTLNNYNKEDISTILNSNSSKCSKFIFQEEVGSSGTKHLQGYFYFPEKIRPLSFFTFSNHPYWAKCKSVKGSIEYCSKIDTRNGEVYNRNIHIPKPPYKLNINLYVWQVPIVSLLSMPPNDRLIYWFFEPEGGIGKTTFQKWYFMKFNSTKHILCLSGKSADMKHGIINYIDKTGHTPEIVFINIPKSNSKFISYTGLEEIKDMWFYSGKYDGGMVCDQNPHLLVFSNSEPEYEKMTQRFKVIKL	unclassified	und(AlphaNanoSmacolike)|und(AlphaNanoSmacolike)	0.29
HQ322117	Picobiliphyte sp. MS584-5 nanovirus	MDDDRANRAEESGEGNTVLSPPKQGTQHTFWCFTLNNYTAEQIEHLELVFKHECKWYLFQEEVGEKCGTPHLQGQICLKTRMRMTELKRIDMKISWRATKSCTASLEYCKKKETSTGKIYYHGMDVPDQVDLEEPYGWQLDILNVLKDKPHNRIIHWYWEPTGGKGKTSLSKYLVVKHDALMLTGKSNDMYHMISKFPKKRKLFIVDCPRSQQDYINYGAIEQIKNGLIFSGKYEGAQLVFNAPHVIVFANEPPDISKMSLDRWNVVRIA	unclassified	und(AlphaNanoSmacolike)|und(AlphaNanoSmacolike)	0.19
KM598411	Odonata-associated circular virus-16 isolat OdasCV-16-US-1614LM1-12	MPRKMESLESSGGGNSIPPPIKEKRMNQGRRWCFTWNNYDDNVVTAIKERLESKDILRYIVGFEIGEKEKTPHLQGYFEFTGQIARRPSEMWDNYNLGRFFKCKGTAEENHAYCSKSGNYFQGGDWSILKNKEPLPIEVLKDEDLYPFQKSIIDIIDGPVIKGHIHWICDLKGQNGKTELLRKLVVERNLKFTYGGKKADIINLIYNNKQYYLTTKNAAMVYNLGRSEDLEKVSYTSMEQISDGLISNTKYETGCFVMNHPHIIVLANGMPSIRSMTMSRWIIYKINDAKELERIEYESHSNLGSPLDDLDN	unclassified	und(AlphaNanoSmacolike)|und(AlphaNanoSmacolike)	0.09
KT945165	Ctenophore-associated circular virus 4	MTEPTQQDTAGNSGGNTKGKRRCFAFTWNNYPEEHFKLFDTVAQLSGCKFVYQEETGENGTKHLQGALYFENARSWTSVRKLMDGWHLEVARNWMACVKYATKVETRTGDQYSNFLELRPKDPLEGKVLHPWQSDVMNLISSDCSNDRTVHWFVDSEGAKGKTSLCKHILLNKVGWLFISAGKGGDILCAVARYLKSGKKLRGVLANYSRDKEGFISYSALESIKDGLIFSTKYESQHAIFDSPHVICFANWIPDKRKLSDDRWDIRTL	unclassified	und(AlphaNanoSmacolike)|und(AlphaNanoSmacolike)	0.08
KX388507	Cruciviridae sp. isolate CRUV-28-F	LINETTEKEIAEIIDEYDPKKQGRCWIFTVNNYLPQEMELLLESDKFDYVCFGEEIGEKCGTPHLQGFFELSCPLQWKTVINRVAGVLGREQASIRPMAKGSNRWCCISYCKKGEQLKTEWDLLKTNGPNYGKNVKFHEKQKGKPHCNQGKRTDWIRVRDSLNLEPDYGKFCQTDPENAIKFHNGIKAFIQAREEIKMKEDLEKEYENVNLLEWQQQLANEIKYSPINQRLVTWYYDKRGNSGKSWMAKYMVSRGDCAYFNNGSTSDIVYAYKNERTVVFDFSRKTEGTMNYGVIERIKDGMMFSAKYQSTRKCCARPRVICFANFMPDLTSMSLDRWDIRVLDNIEVPTDTEKVCSLPASCGLGTKPDVVSIDSDKDHGVSGNTMCSPPDDEKITKLI…	unclassified	und(AlphaNanoSmacolike)|und(AlphaNanoSmacolike)	0.15
JX904401	Uncultured marine virus clone SI00063	MSSRNWMFTLNNPTVSDKPMEWKDVKFIAYQREKGDNGTPHYQGYLMMEKKVRLTAMKKLNARANWQVRKGSHEQAVAYVTKEDTRIEGPWEKGDAPQPGKRTDLDAACQVAQEEGLEALIEQHPTEYVKYHKGLEKIAQKSYDTQVKAQRLAKYEGAVLRPWQQQLLDKIQREPNDRTIMWYWEDTGNVGKTWFGKYLRDTQKGKLLDCSKKVDLAYMLRGHTGECVVFNIVRSMDEQYMQHVYGLCEAIKDDCVVSTKYEPCDVPLLKQHVVVFANIEPDYTKWSDDRYDVVKINDVTPFNQSKKRQREPALCEWGCKAGDACMCAQSESRSKKLAV	unclassified	und(AlphaNanoSmacolike)|CRESS5(AlphaNanoSmacolike)	0.04
KR528543	Petrochirus diogenes giant hermit crab associated circular virus isolate I0004A	MEGKRVRYRRYCITINNESDNKRILGLFLEDGIKKGVIGVETAPTTGTKHLQGYIEYPTQRDWSSIKKVCPNAHIEAAKGTSRQNYEYCTKEGNFVVHGHFETGKRKRRDYSLSEYVKQVLQDELPNDSTFIRNYEKIQTHAKLVSSRQEKVRLFGELSCCKVTSWQRKAIESLFLQGKREVLWIYESVGGKGKTFLATILEVVYGFTRFDGITKSRDIALLIPPIPKGFVFDVTRDDASNFSYNTLEQVKNGYVMSGKYGGSQHLFRPVPVIVLSNFEPIRSSLSEDRWKVWNIENASNEKKEDLPEEGKIPPKAVLFEEEENKENQPNAEASNSQQSNKDVEQHREK	unclassified	und(AlphaNanoSmacolike)|und(AlphaNanoSmacolike)	0.08
JX185417	Dragonfly orbiculatusvirus isolate TO-DF14-2010	MYKRWCFTLNNYSVVCNWEEFFNNGCSTGNKLCRYVVGYEIGESGTRHLQGYCVLSRSQRLSYVTKLFDGAHWEGARGSDQQNYDYCTKSGSFFRGGDWNVLSRSSSGSSDRIRDVIKTLYSMPGSEVRCSSTYVRSKRAIDEVVSEYREFEVRKLRFRELSTCLLKLWQMSVLLKLFNQNDRQVLWVVDVAGGCGKTFLSNILFSCYSFDLFDGVTQAKDICFLLSETINGIVFDVTRSDSSQFSYQTLEACKNGFVMTGKYMGKRRVFKSCPVVIFSNCEPDLVRLSSDRWVVYNVPAQARSQEAIYSPQALWPFKEIEAVLLSEIE	unclassified	und(AlphaNanoSmacolike)|und(AlphaNanoSmacolike)	0.11
KP153503	Lake Sarah-associated circular virus-46	MTKQSRHWQLTDYEVTEPYVIPQYGDYTVGQVERCPDTGKLHWQLYCYTKDLLSVKAFKKRYPIVHFEIARNPKALEDYGQKEETRVAGPFHYGEAPAQGKRTDLDKTIHTACTLGKRKAAEENPGCYAKHYKGIEHVIELLKPIYVPPVLELRDYQRTLLDSFLSHNNPRHVYYLYDECGGSGKSKFAEHIRTQYGGLILGDGRIQDWAYIYNSEPYVIFDLTRAQDKGVPLEVPRFCEYLSNGVLTSTKYESKVKSFKAPQCMIMSNTRCDITTLSSDRWIHVDWTNHGQGSQVPSAFQA	unclassified	und(AlphaNanoSmacolike)|und(AlphaNanoSmacolike)	0.04
KP153502	Lake Sarah-associated circular virus-46	MAQNRHWQITDYEVSDEPYVIPQYGDYTVGQVERCPDTGQLHWQLYCYTRTKLSVKAFKKRYPTVHFEIARNPEALRNYGQKEETRVAGPFTWGEAPEQGKRTDLHEAIATWVTHGKRKACEDHPHVVAKFYKGIQFVAEALRPRYVPPVLELRDHQRTLLDSFLSHNNPRHVYYLYDECGGSGKSRFAAHIRDHHGGIILDEGNIADWALIYDGEPYVIFDLARAQEKGVPLIVPRFIEYLSNGSITSPKYESKVKIFKQPQCMIMSNTRCDITTLSADRWIHVDWSNHGQGSQVPSAFQA	unclassified	und(AlphaNanoSmacolike)|und(AlphaNanoSmacolike)	0.04
JX904431	Uncultured marine virus clone SI00373	MASAGAGAAGGGAPRVQGRAWCFTLFNQPNAEEYLPLLFGDDNMQYLVGQTEVCPESGKEHIQGYFYTKRLISFRQAKEMIIGHETSCHIEKRKGTHVQARDYCTKAESRLEDSQPYIFGQEPAQGSRNDLEGFKESVRAGKDWHELLEEESLVVAKHKQFAVEYYQYWRGRKGVEEIVPEAMSESWQKELDEHLNGEVQDRTILWVWSESSATGKTATMHTQMKTHKTLPAKSWREADILYAYDNHDIIWFNIARYEEMQATTFKVLETLSDGGPMLSTKYQSIMKNVKAHIVVTSNQPPPYENLPERIIELKADRVFARKKRVKRTKA	unclassified	und(AlphaNanoSmacolike)|und(AlphaNanoSmacolike)	0
KM573772	Dromedary stool-associated circular ssDNA virus	MHSTTVSESETTTHRRKNLQTWMITGPRTIHKRIIRELFDQCDVKEYIIAKETGKGGYEHWQIRCKASRPDFFEYVHDREPRFNIQKAATEDFDYERKDGHFWCSEDNNEILKCRYGELGDCGMIWQRQLMKRLKKQSVREIDVVLDPAGNKGKSFATIALWERREALVVPRAQTTAERVSGFVCSAWKGEWLIIIDIPRSTKAGKALYETMEEIKDGLVFDWRYSGKTRNIRGTKLVVFTNEPLNLKGLSSDRWKLHGIKADGTLS	Smacoviridae	-	0.42
KT862221	Sheep faeces associated smacovirus 2	MMTIPRRIEKPLDNWCWQCERICSKKLLSYIFEQADVKRYIVAIEKGKNGLDHFQIRLSCSDPDFFEHMKDWCEWAHVEKAETDNFDYERKEGRFWTSDDTTEIRICRFRELGGPGRQWQKQIMQVLKKQDVRTIDVVLDPVGARGKSHFAIALWERGEALVVPRYSCTAEKLSAFVCSAYRGRKIIIIDIPRANKPTTALYETMEEMKDGLVFDPRYSGKTRNIRGTKVLVFTNNPLDLKKLSHDRWNLHGISVDGTLT	Smacoviridae	-	0.62
KT862218	Bovine faeces associated smacovirus 2	MTGPRTIHKRIIREIFKKCDVKKYIIAMETGNGGYEHWQIRCTASRPDFFEYVHDREPRFNIQKAETESMEYERKEGRFWSSEDTTEIRQCRFGELGGKGREWQRQILKVLKNQDVRTIDVVLDPVGARGKSHFTIALWERGEALVVPRYSCTSEKLSAFVCSAYKGEKIIIIDIPRANKPTTALYESMEEMKDGLVFDPRYSGKTRNIRGTKVLVFTNNPLDLKKLSHDRWNLHGITRDGTLS	Smacoviridae	-	0.45
KM573775	Dromedary stool-associated circular ssDNA virus isolat DcSCV_c1358	MLTIPAKRGEFDFYHWLKLFEVWNVKKHVVGLEEGKNGYKHWQARIQLSGEGKQIIGGSEISFFQYMKIYYPKAHIEEASNTWEYERKEGKFWTSEDTASILAVRFGSLRPEQKKILQILESQGDREIDVWLDPSGNHGKSWLTVHLWETGRALVVPRSSTTAEKLSAFICSSWKGEPIVIIDIPRSTKVSGSLLETMEELKDGLVFDHRYTGRTRNVRGVKVMVFTNSELPLKKLSKDRWRLHGIACDGSLT	Smacoviridae	-	0.27
KM573771	Dromedary stool-associated circular ssDNA virus isolat DcSCV_c1345	MVTVPTKHACKRQVKMILEIFDTKRYIFAQEKGKNGLDHWQLRIQISGDKEENFERLQKLFCNKAHIEVANDSWEYERKEGKFWSSEDTKEILKIRFGKLRSEQKKILQILSSQGDREIDVWLDPTGCHGKSWLTIHLWETGRALVVPRSSTTAEKLSAFVCSSWRGEDIIVIDVPRATKPTTSLLETMEELKDGLVFDHRYTGKTRNVRGTKLMVFTNSPLPLNKLSTDRWRLHGISADGSLS	Smacoviridae	-	0.36
KJ577816	Porcine stool-associated circular virus 9	MRINAKCTLVRTIHHKDTLRYKMVTNYMITWSRNDTYKQFNQLMRLIRKNDIHRWIVGIETGTNGYDHFQIRMATRWTFDQMTEIFHGQAHIEECSDTWEYERKSGIFFSSEDTAEIRRVRFGHPNQAQEHIIETARGQNDRQVDVWYDPKGNHGKTWLTVHLWERGQALVVPRSSATPEKLSAFICSAYKGEEFIIIDIPRAGKIPPSLYEVIEEVKDGLVFDHRYTGKTRNIRGAKVIIFTNTKLDEKKLSYDRWRLHGMEKGGEGEPLS	Smacoviridae	Smacoviridae(AlphaNanoSmacolike)|Smacoviridae(AlphaNanoSmacolike)	0.15
KJ577817	Porcine stool-associated circular virus 8	MKTYMLTIPRSVPKRAIMTMIEVNDCKRWIVAKETGHGGYDHWQIRLQTSNDSFFEWCEQHIPTAHVEEAQNKWEYERKEGRFWTSDDTTEIRIERFGRPRGWQETALKRLRTQNDRQVDVWYDPIGNRGKSWLAGHLFETGKACIVPRDWTNPSEICNYLVHNYDNEPIIVIDIPRETGIPKGFYATVEMIKDGLIGTTKWEGRMRNIRGVKIIVMTNHQMDLKKLSKDRWRLNGINAQNAPML	Smacoviridae	Smacoviridae(AlphaNanoSmacolike)|Smacoviridae(AlphaNanoSmacolike)	0.36
KF193403	PoSCV Kor J481	MQTYMMTIPRTVSKRALRIMIEKNDCKKWIIGKEKGKNGYEHWQIRIETSNDNFFQWIQDHIPTAHVEKSDNGVDECRYETKEGQYVTYSDRVQNLIQRYGAFRPNQKRAIQALEATNDRQVVVWYDETGNVGKSWFTGALWERGLAYVTPPTIDTVKGLIQWVASCYIDGGWRPYVIIDVPRSRKWSEQLYSAIESIKDGLIYDTRYHSRMINIRGVKVLVMTNTMPKLDKLSKDRWCICTF	Smacoviridae	-	0.61
KJ577810	Porcine stool-associated circular virus 1 isolate DP2	MQTYVMTIPRTVSKRALRIMIEKNDCKKWVIGKEEGKNGYKHWQIRIETSNDDFFEWMQDHIPTAHVEKSENGVDACRYETKEGQYVMYSDRVQNLMQRYGAFRPNQKRAMQALQATNDRQVVVWYDETGNVGKSWFTGALWERGLAYVTPPTIDTVKGLIQWVASCYIDGGWRPYVIIDVPRSWKWSEQLYSAIESIKDGLIYDTRYHSRMINIRGVKVLVMTNTMPKLDKLSKDRWCICTF	Smacoviridae	-	0.61
KJ577811	Porcine stool-associated circular virus 1	MQAYMMTIPRTVSKRALRIMIDVNDCKKWIIGKEEGKNGYKHWQIRIETSNDSFFEWMQDHIPTAHIERTECGVDACRYEAKEGQYVMYSDRPQNLMQRYGEFRPNQKHALQALQQSNDREVVVWYDETGNVGKSWFTGALWERKLAYVTPPTIDTVKGLIQWIASCYIEDGWRPYIIIDIPRSWKWSEQLYSAIESIKDGLIYDTRYHSSMMNIRGVKVLVMTNTMPKLDKLSKDRWCIRTF	Smacoviridae	-	0.65
KF880727	Turkey stool associated circular ssDNA virus	MKKYIMTVPRSVPKKALKIMIDVNDCKKWIIGKERGKNGYEHWQIRIETSNDEFFKWCKHHIPAAHIEEAQQGVDECLYERKEGQFWTSSDRVETLHQRFGTLRPRQERALLALQSTNDREVMVWYDANGNVGKSWFCGALWERGLAYVTPPTVDTVKGLIQWVASCYMDGGWRPYVIIDIPRSWKWSDQLYCAIESIKDGLIYDTRYHARMINIRGVKVLVLTNTLPKLDKLSRDRWCIFEF	Smacoviridae	-	0.67
KT600069	Human feces smacovirus 3	MVQAWMITAPRTHVSKRAIRIMIDTNDCKKWIVAKERGKNGYEHWQIRIESSNTGFFEWCKLYIPTAHVEKAERGVDESRYETKEGQYVLYTDRVEILKQRFGKMRPNQIRALEALESTNDREVLVWYDEGGNVGKSWLTGALWERGLAYYVPPTVDSVKAMVQWVASCYQSGGWRPYVIIDIPRSWKWSEQLYVAIESIKDGLVYDTRYHAQCINIRGVKVLVLTNTQPKLDKLSQDRWRICVFRGRRGSALIVTLWADFYPPLGG	Smacoviridae	-	0.57
KX838318	Human feces-associated smacovirus isolate BWA7684	MVQAWMITAPRAHVSKRAIRIMIDTNDCKKWIIAKEKGKNGYEHWQIRVESSNTGFFEWCKQHIPTAHVEKAERGVDECRYETKEGQYTCYSDRIPVLKQRFGKLRPNQKRALTALEATNDREVLVWYDEGGNVGKSWLTGALWERNLAYYVPPTIDTVKGMVQWVASCYQDGGYRPYLIIDIPRSWKWSEQLYVAIESIKDGLVYDTRYHSRLINIRGVKVLVLTNTKPKLDKLSEDRWRICVFRGQAGVGPYRNTMGRLLPPFRGVRGGT	Smacoviridae	-	0.57
KX838317	Human feces-associated smacovirus isolate BWA1115	MVQAWMITGPRSESIEVEEIGGWQIEIDRRISKKAIMIMLSKNDCKKWTIGQEVGKNGYKHWQIRVESSNTNFFKWCKQHIPSAHVEKAEKGVDESRYETKEGQYTQYTDRVEILKQRFGKMRPNQIRALEALEATNDREVLVWYDESGNVGKSWLTGALWERGLAYYVPPTVDSVKAMVQWVASCYQSGGWRPYIIIDIPRSWKWSEQLYAAIESIKDGLVYDTRYHAQCINIRGVKVLVLTNTKPKLDKLSADRWRICVF	Smacoviridae	-	0.67
KP233189	Black howler monkey smacovirus isolate SF1	MYMLTIPRDKVSKRELRIMLDKNDCKKWIIGKETGKNGYKHWQIRLETSNEEFFDWCKKHIPTASIRKAEVPKWDYEAKEGQYWTSSDRTDNLIQRFGEFRPNQKRAIQALRATNDREVLVWYDEGGNVGKSWFTGALWERGQAYVTPPTVSTVQAMVQFVASPYVFIDIPRSWKWSKELYCAIESIKDGLVYDSRYQGRMVNIRGVKIIVMTNNKPDLDKLSYDRWRMVVL	Smacoviridae	-	0.59
KY086298	Chicken associated smacovirus strain RS/BR/2015/1	MNKQAYKDLGECQSMQTYMLTIPRKVHKRTLKIMLEQNDVKKYIIAKERGFGGYEHWQIRLKTSNKNFFIWCKINIPEAHVEEAMDTWDYERKEGVYWTSDDTNEIRALRFGKPNLKQKRVLKLLKYQGDRNILVWYDPVGKAGKSWIVGHLWEQGKACYVPPTLGTPKEIIQWVHSAYDNEGLIIIDIPRSWKWNEALYTAIETIKDGLVYDPRYSARMKNIRGVKVLVMTNTYPRVSALSEDRWDIINEGGEAPLS	Smacoviridae	-	0.57
KJ577818	Porcine stool-associated circular virus 2	MANKVYMATIPHSGITKRAFFKMIRDLDIHKWTYAVEKGRGGYKHIQCRFRTNKSFEDIRRALVCAHIEEASDTWEYEKKDGKYMTSEDNHEILKLRYGKLTKVQKWALDALESTNDREVMVWVDSEGNSGKTWLTAHLWERGLACYCPPTLSTPKELISWVHSAYNKEPFIIIDVPRTWKWDDALYTAIETIKDGLVYDPRYSAHMRNIRGVKIMCMTNTMPKLSKLSEDRWVIFRPEHMFDLAEVRNRGATPPETPPSGRRGQGRGPLT	Smacoviridae	Smacoviridae(AlphaNanoSmacolike)|Smacoviridae(AlphaNanoSmacolike)	0.23
KC545229	Porcine stool-associated circular virus 3	MSNKVYMATIPHSGITKRAFFKMIRDFDIHKWVYAVERGHGGYKHIQCRFRTNKSFDQIRHALICGHIEEASDQWEYEKKDGNYMTSEDNHEILKLRYGKLTKVQEWALVLLESTNDREVVVWVDKDGNSGKTWLTAHLWERGQACYCPPTLSTPKELISWVHSAYDQEPYIIIDIPRTWKWDDALYTAIETIKDGLVYDPRYSAHMRNIRGVKVMCMTNTEPKLSKLSEDRWVMYRPNNVFETAELRNTRGGHPPVDRSDVTDRNLPPSGKRGNGGPSS	Smacoviridae	Smacoviridae(AlphaNanoSmacolike)|Smacoviridae(AlphaNanoSmacolike)	0.23
KP860906	Rat stool-associated circular ssDNA virus	MRHPVSMTKCYMITAPRDEEMYALRIWRYINSHDVHKWIIASEIGRNGYKHWQIRIKTSDPDFFSFEEREEPYLTANWKIEYRKVKIGTGWANINIPRSHVEECSDDWDYETKEGRYLASWDTPEVRKLRFGQPRWHQEAIINRLESTNDREVMVWYDPTGNSGKSWLVGHLYETGQAYYLPPTMTSVQSMLQMMASLAIQDREDGRPPRRYVVIDIPRTWKWSKDLYCAIETIKDGLIVDPRYSARPINIRGVKVLVLSNDRPSLDKLSVDRWVVENTPML	Smacoviridae	-	0.3
KJ577819	Porcine stool-associated circular virus 6	MKTYMLTIPRERADRIGTEPIIRLMRYIRENDVKKWIVAMETGRRGYEHWQVRLQAREGFSEWKDTEVPVLGPNWTIVTEKQKVGVGWIQRNIPQAHVEECSDNWEYEAKEGRYWASWDTVEVHRMRWGRPRWYQQALLNKLRTTTDREVMVWYDPEGNNGKSWLVGHLFETGRAYYLPPTLTSVQSMLQTMASLAHQDREKGYPPKPYVIIDIPRTWKWSKELYCAIESIKDGLIMDPRYSARPINIRGVKVLVLTNEMPKLDALSEDRWIIENTPMH	Smacoviridae	-	0.2
KT600068	Human feces smacovirus 2	MDIMATIGRTGYSGFAEIMAIIRELDIHKWIIGAEVGAGGYQHWQCRFKTRLSPEERIEGLEWDLKTATVKQKKRTVGPAEQMTEKLRARIGDGPSIYTAECSDNWEYEAKEGAYLASWDTMKVRSTRFGKPSWQQEVALQALRDTNDRQVVVWYDPQGNIGKSWLTNHLYEQGLAYCIPATMNNIEGIIKTVASLAVKDRDMGYPPRPYVIIDIPRSWKWSEQLYTAIESIKDGLIMDPRYSAQPINIRGVKVMVMTNTMPKIDKLSSDRWVIHTNP	Smacoviridae	-	0.45
GQ351273	Chimpanzee stool associated circula ssDNA virus	MHLFTEVVSVDIMTTMQRTHTNAELIRWFKIFRDLDIHKWVIGLEEGKGGYGHWQVRCNIRVEVVNDWTAYLRAVFSWLGPISIWTEECSDKYTYETKEGRYWASWDTMGARQQRFGKMRWNQEGAVQALQRTNDREIVVWYDEQGNMGKSWLCGHLFETGQAYYIPPYMTSIQSMIQTVASLVLQDRDSGYPPRPLIVIDIPRSWKWSTELYTAIEAIKDGLIMDPRYGARPVNIHGIKVIVLTNTKPKLDKLSEDRWVLYDPMDYPMML	Smacoviridae	-	0.64
GQ351275	Chimpanzee stool associated circular ssDNA virus	MHLFTEGISVDIMTTMQRTHTNAELIRWFKIFRDLDIHKWVIGLEEGKGEYGHWQVRCNVRVEVVNDWTAYLRAVFGWLGPISIWTEECSDKYTYETKEGKYWASWDTMGARQQRFGKMRWNQEGAVQALQRTNDREIVVWYDEGGNMGKSWLCGHLFETGQAYYIPPYMTSIQSMIQTVASLVLQDRETGYPPRPLIVIDIPRSWKWSTELYTAIEAIKGGLIMDPRYGARPVNIHGTKVIVLTNTKPKLDKLSEDRWVLYDPMDYLMML	Smacoviridae	-	0.67
KU043403	Unidentified circular ssDNA virus isolate 1705_10199	MTKTVMITMERRETYKEWNWFLFAIRKLDIHKWIIAAEEGKGGYKHWQIRIASRFDAKWWTRALLIQFGQRSIHTENASNTWTYEAKEGCYLASWDTLEVRQQRFGKLRKVQKYALNVLEGTNDRQVMVWVDEEGNSGKSWLIGHLYETGQAYYAPPYLTSVKEIIQTIASLAVKDRDAGNPPKKYALIDIPRSWKWSNELYTAIEAIKDGLIMEPRYSAQPINIKGIKVLVVTNTRPKLDKLSKDRWEIFEWDNNPTIDTYLRGAQEKRTL	Smacoviridae	-	0.27
KP233194	Lemur smacovirus	MTNVYMITMPRKGYSGFIAIMRFFRKFDVHKWIVSPEKGAQGYEHWQIRFRCGLTPENAMIAWRQWVCNGFNMLEASDNGWEYEGKEGKFLASWDSKGARSVRFGKMEWRQEATVLRARATNDREIVVWYDPKGNSGKSWLVGHLVETRQAYYVPPYLATVESMIKTLASMVKADRENGNPPRPLVVIDIPRSYKWKNDMYVAIEAIKDGIIVDPRYSATVENVKGIGVIVITNEKPQVGKLSADRWDIVDW	Smacoviridae	-	0.45
KT862225	Porcine faeces associated smacovirus 1	MQTWVLTIPRRTEIQVPTWLWLAWEPVTIVSVCSKKLLNYILEQSDTKRYIIGIEKGKNGLEHFQIRLSCSDPEFFEHMKEWYPYAHIEKSDVGINSESMEYERKEGRYWTSMDTTEIRIQRFGKPNRTQQRVLEVLRRTNDREIVLWYSDKGSIGKSWLVGHLWETGEAYVCQPQDTVKGMKQDVASEYIKHGWRPCIVVDLPRTWKWTKDLYCALESIKDGLLKDTRYSSDTINIKGVKVLVTSNTLPKFDSLSFDRWIVIENTIERRSFS	Smacoviridae	-	0.57
KJ577812	Porcine stool-associated circular virus 7	MTKTWMLTVPRNNTAKEWVAISKWLRANDVHKWICAMETGADGYDHWQIRLQVNKTWEKLKEEWGPKAHIEEASDVWDYERKSGLFFSSQDTPEVRKCRFGHLTWRQKAVLRAVQSTNDRQVVVWYDPEGNKGKSWLLGHLYETGQAWVVQAQDTVKGIIQDVASEYINHGWRPMVVIDIPRTWRWTSDLYVAIERIKDGLIKDPRYSSKTVHIRGVKILVTCNTMPKLDKLSEDRWIIIDGDALERLRSAWRIGEGEHSLT	Smacoviridae	-	0.47
KJ577813	Porcine stool-associated circular virus 7 isolate EP2-B	MTKTWMLTVPRNNTAKEWVAISKWLRANDVHKWICAMETGADGYDHWQIRLQVNKTWEKLKEEWGPKAHIEEASDVWDYERKSGLFFSSQDTPEVRKCRFGHLTWRQKAVLRAVQSTNDRQVVVWYDPDGNKGKSWLLGHLYETGQAWVVQAQDTVKGIIQDVASEYINHGWRPMVVIDIPRTWRWTSDLYVAIERIKDGLIKDPRYSSKTVHIRGVKILVTCNTMPKLDKLSEDRWIIIDGDALERLRSAWRIGEGEHSLT	Smacoviridae	-	0.47
KP233191	Gorilla smacovirus	MTQTWMLTVPRRKTEKEWMGIYKWLRDNDVHKWTVAMETGNNGYDHWQIRFQVGKTFKQLKKEWGPKAHIEEASDTWEYERKSGMFFSSDDTPEVRKCRFGRLNWRQRTIVRAVQDTNDREIVVWYDPNGNKGKSWLLGHLYETGQAWVIQAQDTVKGIIQDCASEFINHGWRPIVVIDIPRTWKWTSDLYVAIERIKDGLIKDPRYNSKTVHIRGVKVLITCNTMPTRDKLSADRWVIVEL	Smacoviridae	-	0.44
KU043428	Unidentified circular ssDNA virus isolate cg4629	MYMAAQTNYKFRQRLQSIMTHTWMLTVPRRKTAREWMGISKWLRDNDVHKWTVAMETGDNGYDHWQIRLQVNKTFKQLKKEWGPKAHIEEASDTWNYERKSGLFFSSNDTPEVRKCRFGRLTWRQQAVVQAVQGSNDRQIVVWYDPNGNAGKSWLLGHLYETGQAWVVQAQDTVKGIIQDCASEYIQHGWRPFVVIDIPRSWKWTQELYVALERIKDGLIKDPRYGSKTVHIRGVKVLVTCNTKPKLDKLSADRWVIMNMNTLEAECAAMEVADRIWED	Smacoviridae	-	0.35
KU043430	Unidentified circular ssDNA virus isolate cg5878	LRRIRETMGKTYMLTIPRNDTYREGNKIFAWFRKNDIHKWVLGAEKGSGGYEHWQMRVQCRFGFEELKVLFPTAHIEECSDKWTYEAKEGVYWRSNDRRENIQQRFGKLRYAQKRVIERADGTNDREVVVWYDQEGKAGKSWLTGAMWERGLAYFSVADTSGKTIVMDIASEYLKNGWRPYIIIDIPRAGKWTPELYEAIERIKDGLIKDPRYSSEAVNIHGVKVIVMTNTMPKLDKLSADRWKIITQQELTLEETAIEQFALTGKGGYRPPLTPPTWDSRDVRGPLS	Smacoviridae	-	0.43
KU058671	Unidentified circular ssDNA virus isolate Masavirus	MTIWMVTLPRNDTYKEWHSIWMWFVKHDVKKWVFGLEKGRFGYKHWQIRFKSNLKFEDLKVMFPTGHIEEASDTWTYETKEGVFWKSTDRPENRAQRFGKLNKDQEGVIRALQSTNDREVVLWYDSEGKKGKSWLTRALWERGQAYFIVADSNVKTIVQDVACEFIKNGWRPYVIIDIPRAGKWTTELYEAIERIKDGLIKDPRYSSESINISGVKVLVNSNSLPELDNLSKDRWKIYPFCTTGDIVPYVKRTQRKRKTDVGGSEPR	Smacoviridae	-	0.56
KM573770	Dromedary stool-associated circular ssDNA virus	MGIYMVTAPRKGSKLGTGKEFMKWRTFFYINDVHKWTLGAETGKGGYKHWQVRLQISGSDNEVFNKIKDENMFPTAHIEKGSDTWSYECKEKMHWTSNDTPNILRVRFGHMRWYQKDVIEAVRRQNDRQIAYWYDPEGNKGKSWLVNHLFESCQAWYVPPTLKSVEGIIQWVASVYINNNYREILVIDIPRSWKWSTELYTAIETIKDGLVYDPRYHAQMINIRGVKILVLCNHEPKLDALSADRWYAVAPALT	Smacoviridae	-	0.3
KU043422	Unidentified circular ssDNA virus isolate cg6965	MTNKIYMITMPKNARNKFLIKNLIETNDLHKWTYGYEIGKNGYKHIQARIRCPFDFDYLQEYFGQAHIEEASDEWDYETKGGIYFTSEDWGERLKQRYLPLKEVQRKALEGLEATNDREVYVWYDEKGNAGKSWLCGHLWETGKAYVVDSDKGETIKKDVANEYINHGWRPYVIIDLPRTAKWTDELYYAIEKIKDGLLKDPRYQSKTVNIHGVKVMVMCNHRPNVSKLSADRWKMFTGAAAPEPPAMQTAGGLSRST	Smacoviridae	-	0.64
KU043420	Unidentified circular ssDNA virus isolate cg6502	MSRLLIRTRKFRHRRISVILIKRCRILIKSSFKNLYDCKRWTLGIETGKGGYKHCQWRVECGDDQFFEHFSEFTARKEFIGFGATGWGEFSIEKKSHIEKSDKWSDYETKEGHYVKSDDRVENIIQRFGKYREAQERVIKALRRTNDREVVLWYDKVGNCGKSWFTGALWERGLAYVTAESKDDAVIKDIASDFLDHGYRPFVIIDLPRTAQWSNELYLAIERIKDGLIKDPRYNSRTVNIRGVKVLVCCNSLPKLDKLSKDRWVRLEADGTPWTGSSAGAQS	Smacoviridae	-	0.22
KT862219	Sheep faeces associated smacovirus 3	MLTMPWTGQSKRMINLYITRNDIHEWIIGYEVGRDGYRHIHVRFNGRGDFGDVQRAFPGAHIEEGTTMETEYEKKDGHFVSYEDSPDVLRCRFGKLRDHQRRVVKLLEKQSDRGILCWYDETGSIGKSFTCRHLVERRRAYYVPPTVDNVKQIIQWVCSGYQRQRYLIIDIPRSAEWNKSLYTGLEAIKDGLIYDTRYSAKLRDIWGVKILVLTNSLPNLDALSQDRWMIINRDGKDVTEWARIESKKRAKKKADEGGKKKTKKSEE	Smacoviridae	-	0.5
KT862220	Sheep faeces associated smacovirus 1	MKKYVLTVPREADLRPICRMLSDAKKWTIGFEVGEHGFRHYQIRLVSSDHDFFEWCKAFLPTAHIEEATEERDDYERKSGNFLCSDDTDQIRQIRYGDLRKIQKKILKLADDQNDRQISYFYDPDGGWAGKSWLTIHLWERGNCFVVPRSKATAEKLSAFICSGYKAEEYIVIDLPRAPTGDIGLYELLEDTKNRLIFYSRYQPITRNIRCPNLIVFSNHKLDTKRLSADRCQYYDLSVWDPLEVTL	Smacoviridae	-	0.58
KT862222	Bovine faeces associated smacovirus 3	MGKYSVTISADLWKERDVVRLLDMVDLREYYIGREIGKGGYHHYQCAIDCGGDLERFNGQHQLGWHIEDCASWDKLVRYCRKGGDYRYIGDSIEEQSYRSRGTTAVGHTIDTHLKKQNDRQISICVDTKGGSGKTTHGYDRSRTGEYFVVPRNAETPTRIMDYVAMNYDNEPVIWIDLPRTRKIDKGLATILEDMKDGLIYSAKYEGQVRHIKGVKVLVTTNHYIEKPAYKLLSADRWDVFTPPTKAGDSRDGNTGLSPLGG	Smacoviridae	-	0.29
JN634851	Circoviridae bovine stool/BK/KOR/2011	MKYVATISRTSIPEHHLVRLLKLLDLHEAYIGRETGARGFEHYQCCIDCAGDLVRFNTEHQLGWHIEECVSWEASKNYCRKTDNYRYVGDSIEEREYSRIATRPKNIVADRIQFHIDHRNDRAISICVDTIGGTGKSTYGYLCARRGQFFVVPRTAETPTRIMDYIAMHYDNQPVIWIDLPRSRLVDKDLAECLEDIKDGLVASAKYEGCLRFIRGVKVLVTTNHWVDKTTYKMLSADRWDIFTALPSTEGESSR	Smacoviridae	-	0.45
KM598409	Odonata-associated circular virus-21 isolat OdasCV-21-US-1679SC3-12	MKKCEACEERPANYGYVKWINCIDGIDRYWFGYICDECYHKFEEEWAKEEECNVQYIGTISAEDWNEDGIIRVFENLDGHELYIGREIGKHGFRHYQFCMDCAGDLEKYTADNRTGWHVERCISWEMSKGYCRKTGDYRYIGDSREERYYAWLRARRPLPIWRSFGASVVKQNDRSITVWVDTEGKAGKSTFSYILERRGKCLNIPRTEHNPTRLIDFVAMHYKGEPLIIVDIPRDQKLGKELCRALETIKDGVITSAKYQGTKMFIKGVKILVFTNHFLDKTTYAALTEDRWDVKSLKASKSHPR	Smacoviridae	-	0.33
KT862223	Bovine faeces associated smacovirus 1	MGFITEDAFFPEFLEKTLQEALDKICERYAYGNEVGKDGYEHFQCRIVCSKPTDERALRVFLLSNGIPAHTSPTQVRNFEYVQKEGNLYCSWEAVLKQFPRGTPYMWQLIAFSMWKKQNDREILVITDDKGRHGKSWLRKYMVACHMGTFIPPLEKAEDIMACAMAKPSKGYIIDMPRADGKVRKAMWSAIEQMKDGYLYDKRYSWQEKWIEPPKIMVFCNDFDPLMLSTDRWQSFDITDFPQE	Smacoviridae	-	0.64
KP233179	Human smacovirus 1 isolate France/1/2009/3663	MPSTKWYDITASKEKLPRSILEKWLNERCERWAYGNEVGEGGYEHYQIRIVLKEPTDEYEMRKMWAAFGHVSPTHVRNFDYVLKDGDFVCSWIKYPESMVNPTFRAWQQCLLELEQSDREIDVIIDLKGNTGKSWITKYLALKNKATNVPSGLEAKDIMRMCLKRPTTGWYIFDMPRASSKQAKSTWSAIESIKNGYLWDDRYTWEEKWIEPPKVTVFTNEYPKYDLVSEDRLRMWAPTETGLVALAK	Smacoviridae	-	0.56
KP233178	Human smacovirus 1 isolate France/1/2009/3664	MPSPKWYDITASKEKLPRSILEKWLNERCERWAYGNEVGEGGYEHYQIRVVLKEPTDEYEMRKMWAAFGHVSPTHVRNFDYVLKEGDYVCSWIKIPENMQAATFRPWQRALLDLEQDDRQIDVIIDLAGNTGKSWLTKYCALKMRAINVPSGLEGKDIMRMCLKRGAQSGLYIFDMPRAITKQSKSVWSAIESIKNGYLWDDRYTWEEKWIDPPRIWVFTNEYPKYDLVSEDRLRFWAPTPTGLVSLAH	Smacoviridae	-	0.63
KP264965	Human smacovirus 1 isolate France/3/2008/2623	MPSPKWYDITVSADKVPEKTMVEWLNKYCERYAYGRETGENGYKHYQIRLVLKVGADISEMRKVWSAFGHVSCTSVRNFDYVLKEGDYVCSWIKIPESMVNPEFRPWQRALLDLEQDDRQIDVIIDLQGNSGKSWLTKYCALKMRAINVPSGLEGKDIMRMCLKRGAQSGLYIFDMPRAITKQSKSVWSAIESIKNGYLWDDRYTWEEKWIDPPRIWVFTNEYPKYDLVSEDRLRFWAPTPTGLVSLAH	Smacoviridae	-	0.65
KP233175	Human smacovirus 1 isolate France/1/2008/2610	MPSPKWYDITVSADKVPEKTMVEWLNKYCERYAYGRETGENGYKHYQIRLVLKVGADISEMRKVWSAFGHVSCTSVRNFDYVLKEGDYVCSWIKIPENMKNPEFRPWQRALLDLEQDDRQIDVIIDLQGNSGKSWLTKYCALKMRAINVPSGLEGKDIMRMCLKRGAQSGLYIFDMPRAITKQSKSVWSAIESIKNGYLWDDRYTWEEKWIDPPRIWVFTNEYPKYDLVSEDRLRFWAPTPTGLVSLAH	Smacoviridae	-	0.65
KP264967	Human smacovirus 1 isolate France/12/2008/3454	MPSPKWYDITVSADKVPEKTMVEWLEKYCERYAYGRETGENGYKHYQVRLVLKVGADISEMRKVWSAFGHVSCTSVRNFDYVLKEGDFVCSWIKVPDAIRNAQLKAWQQHLVDLKQNDREVDCIIDVRGNTGKSFVTKYMCMKNMAINIPSGLTGKDIMRMCMKRAKLGTYIFDIPRAGSKQAKETWSAIESIKNGYMWDDRYTWEEMWIDSPRVFVFTNEYPKYDLLSEDRFRFWAPGELGLVQLAK	Smacoviridae	-	0.61
KP264964	Human smacovirus 1 isolate France/2/2008/2548	MTEPKWYDITVSKAKCPEEILRKWLDENGERYAYGRERGEDGYEHFQVRVVLRNPTSWETMREIWGNSGHCSPTSIRNFDYVLKEGDFVCSWIKVPDAIRNAQLRPWQQHLVNLKQNDREVDCIIDLRGNTGKSFVTKYMCMKNMAINIPSGLTGKDIMRMCMKRAKLGTYIFDIPRAGSKQAKETWSAIESIKNGYMWDDRYTWEEMWIDSPRVFVFTNEYPKYDLLSEDRFRFWAPGELGLVQLAK	Smacoviridae	-	0.5
KY086301	Chicken associated smacovirus strain RS/BR/2015/2	MTSPRWYDITVSKAKCPEEILRKWLDENGERYAYGREKGTDGYEHFQVRVVLKNPTSEQDMWKVWAPYGHVSPTHTRNFNYVLKEGDFVCSWIKIPESMKNPVFRPWQQALMDLEQNDREVDVIIDLKGNTGKSWITRYLALKNKAINIPSGLGAKDIMRMCLKRAVVPWYIFDMPRAIGKQSKELWSAIESIKNGYLWDDRYTWEEKWIDPPKVTVFTNEYPKYDLISEDRLRFWAPAEVGLVALAK	Smacoviridae	-	0.56
KT862229	Bovine faeces associated smacovirus 6	MSDPKWYDVTAPQAVLSAENVETILEQLECERYAYADEVGEGGYKHWQIRYVLRKGSPVEEQIMIWSMWKAHVSPTHVRNFNYIMKTDNYFCSWESELREYRYLEYRPWQKYTLEMIEQQNDREIFVIQDPLGGIGKTTFAKHLVANHKAIYIPPLGEGQEYMAMAMAKAREGRRETFIIDVPRAESLKKKAGMWSAVEQIKNGFLYDKRYQWSEKWIKSPKIVVLTNETELPKDKLSNDRWNVYQPGNFEY	Smacoviridae	-	0.62
KM598410	Odonata-associated circula virus-5	MKWSIYIICGPIRIVIRRYRSMTEPKWWDCTLSREETFGNGNPNPYYTWHAPDVGKQLMEHGAERCVVGEEVGEDGYQHFQIRVVFKKPTSFEKATAILPGSHWSETSQFGRNFDYVEKEGHFWRSWETALGRFMQLDMYPWQNEIMTRLEKQNDRKVMVIVDRYGNSGKTAIAMRLTAEHKGAYCPELEDAKDYMAWALAHKNAGCFCLDIPRAGDVRKDTAIWKAVEQMKNGYLWDKRHHWQEAFIMPSKGLVLTNDEPDRNLLSRDRWDIGHLDYGISNWANTIKWDS	Smacoviridae	-	0.48
KU203352	Porcine serum-associated circular virus isolate BR2	MSRCKWIDATAWTPVDATDWSMVCTGLRNENVMKLEDWKNGLSGYFERYAFGCEVAPETQRRHYQFRGVLKADLSNDIALALSDLGLRHITPTHVRDFEYVYKDRNFYCSWEVFRPEYEKVQNSPHVWQVQLEELDRDERSIEIIWDEKGNSGKTAWAMYQDYSHRAVYIPPLKRGLDLVACVLGKRESDWYIIDTPRAFEFNDDWACSIEQLKNGYVFDTRYSFRDKYLSVRPRVTILCNHMPDYESYFSADRVLPFRITPEGYLWSV	Smacoviridae	-	0.5
KJ547633	Sewage-associated circular DNA virus-9 isolat SaCV-9_NZ-BS3681-2012	MANVKWIDATIWCEGDNAFEGVKDESEWRSRFAGLFERYAYGRETAPETGRRHFQFRGVLKVACDASCLAYLSSLGFRNISPTHVRDFDYVYKDRDFFCSWDVYRPEYDLVRNSPHVWQVQLEDMERDDRTIEIVWDERGNSGKTAWAMYQDYLHKAVYIPPPQRGLDLVACVLGKRESDWYIIDTPRAFEFTDDWACSIEQLKNGYVFDTRYSFRDRYLSVRPRVTVLCNTLPEYERYFSADRVLPFRITPEGYLWSV	Smacoviridae	-	0.57
KM573769	Dromedary stool-associated circula ssDNA virus	MTNPTWFCGTIWKHLTEWTMEQLAEWFKQHHAKEGVIGLEISPTSGKEHYQFKIHLDRGETLEGWKALIGPMGHIEIAVDKNFSGYEEKDGNFIKWPTSPLEKYKSLKLRTWQIDVVETFERQDDRRILVVVDKQGGNGKSYLSRFMEATGKADVCPVISDEYNDYSAYCLDNPCKGYVFDLPRATSIKRRSAMWMGIEQIKNGLLYEKRYRPRKMWIEPPKVLVFTNDDVPWDMLSRDRWEAYELYNGQLFLLKPPNDTE	Smacoviridae	-	0.48
KT862224	Bovine faeces associated smacovirus 5 isolate 48_Fec9_cow	MVRSHNMERALPDEHGTTQRLAYQPHAKEGVIGEEISPTSGKTHYQCKWHLSRGESIDGWKLLIGPMGHVDIAVEKRFTGYEEKDGKFVKWPESPIAKHKNLALKTWEVALLDSIKNQDDRHITVVVDKQGGNGKSTFSKYLEANDIADVCPVVSDEYNDYTSYCMEFPKKAYVFDLPRATSIKRRTAMWSGIEQIKNGLLYEKRYKPRKMWIEPPSILVFTNDDIPWELLSEDRWDAYRLHDDTLYVLSKPSDDYINGSNATMDEDSRLI	Smacoviridae	-	0.5
KM573774	Dromedary stool-associated circula ssDNA virus	MTNPTWFCGTIWKDKYSGSKEQLAEWFRLHHAKEGVIGEEISPTSGKIHYQFRIHLDRGETLKGWQELIKAVGHVEVCQEKKFTDYEKKDGNWIEWPESYLGKFKEMPLLFWQEQLLEQWNEQDDRQILFVKDVKGGNGKSTFGKIMEARGLEEVCPVCSDDYNDYTSFCLEYPAKGYIFDIPRASSIKRRTALWSGIEQIKNGLLYEKRYKPRKVWIEPPKVIVFTNEDEPPWDLLSLDRWRVFDVEQYVNPITYNIRSHWEVD	Smacoviridae	-	0.57
KT862228	Bovine faeces associated smacovirus 4	MTIPQSEMSKRELLHYLRHRSKRWQFGRETGRNTGYRHYQVRYESSNDDIGRERLYWVGIACELEPSNGWSNYELKDGDFYTSDDADLGKYRFGKLRKFQTRLLEYLESRNDRTVGIVVDHVGGKGKTYFARYCSLNHKAVYLHGSGTDNQVARDLYDISESERINAVIIDCTRSENNLSESDFWNGIEQIKNGHLCDRRYGYREKWIRPPAVLILSNHDPDWKCLSEDRWHKFFIKEDAMYEYYKREKKVTSL	Smacoviridae	Smacoviridae(AlphaNanoSmacolike)|Smacoviridae(AlphaNanoSmacolike)	0
KM874313	Avon-Heathcote Estuary associated circular virus 8 isolat AHEaCV-8-NZ-4738GA-2012	MYMGDSQLAVWDFRYNASTFKSESDLKAVLKGIAKKWVFQLERGDEGYEHYQGRMSLIKGRRKGEKHILLKLFKETPPNYLEPTSKTEATKGDALYVIKEDTRLKGPWTDKDEVKVETTQLKIFKSLELRPYQRKLEEFARTFDMRKIDIIYDPIGDLGKSLFSEWMEYEGLAEEIPPYRLMDDIFQWVATRPIKPCYIVDMPRGMKKDKLGDFYSGLEVIKNGVAYDKRYNATKIRFNRPRVFVFTNTLPEFSLMSKDRWNVWEVQEDYDILLRNEMGTLSMK	unclassified	und(AlphaNanoSmacolike)|Smacoviridae(AlphaNanoSmacolike)	0.14
KM874368	Avon-Heathcote Estuary associated circular virus 29 isolat AHEaCV-29-NZ-1590TU-2012	MSNPITGYDFRYNADDYTPQDIKGFLKGVAKSFVFQKEKGDSGYLHYQGRLRLIKKRRRTKALSLFVTPPNYFQPTVGSEYKNGDAFYMMKEDTKIEGPWTDKDEVKVLTTQLAWYNSQEERPFQKKLREMCSIFDMRTIDLIWDTTGNCGKSLLCEALEYDGLCEEIPSYRLMDDIFQWVATRPIKKCYVVDMPRGMKKDRLGDFYSGIEVIKNGVAYDKRYHAKKVRFSRPRIFVFTNTLPCLNLMSIDRWKIWKVNENYELIPHH	unclassified	und(AlphaNanoSmacolike)|Smacoviridae(AlphaNanoSmacolike)	0.1
KM874351	Avon-Heathcote Estuary associated circular virus 22 isolat AHEaCV-22-NZ-2138TU-2012	MNPIAVYEFTLKKQDKQNENEIIKILYPTIVKKISFQLEKSDEGYEHYQGRISLVKKRRMKETLDVLKPHFPDIHISPTCNNGLTENFYTTKEDTRIDGPWTEKSYVYVPRQIREIVDLKPWQKSVVLLSRIWDTRTINIIVDTEGNIGKSTLTTYMGIHNLAKQIPFCNDYKDVLRMVCDMPTSGCFIIDMPRAIRKEKLYQMYSAIETIKSGYAYDERYHFKDKYFDCPCIWVFTNIIPDETLLSRDRWRKWEIINEELKKFDPLMMR	unclassified	und(AlphaNanoSmacolike)|Smacoviridae(AlphaNanoSmacolike)	0.12
KJ547653	McMurdo Ice Shelf pond-associated circular DNA virus-8 isolat alg49-57	MCGRWGFRDWDPVEARLYQPTVQKVLEDYGDDWIFQLEMGESGFVHYQIYWKLTKRDRPKTLAIALNERLPGIELSAASTGGVLALKRYCMKDDTRLAGPWSKKKIYRGEDLPVKMLPWQQKLADYLKTEAGKREIIWLMDPLGKMGKTIFGKMMAYWRGALYLTWGDTKDVMNLVAKSDKNNVYIFNLSRTKPKMMSSDDLYTALEQIKDGAFINTKYETSQVLMKPPHVVVMANCMPEMAKLSKDRWNVIVMKFSDRPPVEEETRFTMEDPVKEREGGGSSSQETVVLSQEEHEVMGDQFPDSSAPTGASV	unclassified	und(AlphaNanoSmacolike)|und(AlphaNanoSmacolike)	0
KX388527	Cruciviridae sp. isolate CRUV-48-B	LDILFEMAQTDLEQLYTRVDVSKKKCITDTIKFIKKQKEWAPSPPPAEVKSAKQEEYEKLQKHRSMSFTINKYSEDTPLNMFTYAQIKYCIFTFEFAPTTGTPHIQGFMQFDKQVLLSTLRNTIHANFSARESHGSVEDNIRYMVGGFPVKSKQNEIKPKNRKEMVFCWGTPPEQGKRNDQTQVIEAIQRGDDIDDIFVDNPEYCMKNPKGVQKMHEVQRRVRRISAVKKRFAGMKFLPWQDQLIEIMDGEISDRIVHYIYDPIGHAGKSKMTTYFSVHKKAFSVGPASVRDMAYSLISSGYDGGSSVMIDIARSKDVGTQEYSYKGIMQFCEQVLNGDITVSKYESQQWHGLPSHVFIFSNEPVQLYTEEGKLILSVDRLRYYTINVNMELQSISQSY…	unclassified	und(AlphaNanoSmacolike)|und(AlphaNanoSmacolike)	0.38
KX388528	Cruciviridae sp. isolate CRUV-49-B	LDILFEMAQTDLEQLYTRVDVSKKKCITDTIKFIKKQKEWAPSPPPAEVKSAKQEEYEKLQKHRSMSFTINKYSEDTPLNMFTYAQIKYCIFTFEFAPTTGTPHIQGFMQFDKQVLLSTLRNTIHANFSARESHGSVEDNIRYMVGGFPVKSKQNEIKPKNRKEMVFCWGTPPEQGKRNDQTQVIEAIQRGDDIDDIFVDNPEYCMKNPKGVQKMHEVQRRVRRISAVKKRFAGMKFLPWQDQLIEIMDGEISDRIVHYIYDPIGHAGKSKMTTYFSVHKKAFSVGPASVRDMAYSLISSGYDGGSSVMIDIARSKDVGTQEYSYKGIMQFCEQVLNGDITVSKYESQQWHGLPSHVFIFSNEPVQLYTEEGKLILSVDRLRYYTINVNMELQSISQSY…	unclassified	und(AlphaNanoSmacolike)|und(AlphaNanoSmacolike)	0.38
KX388529	Cruciviridae sp. isolate CRUV-50-F	LDILFEMAQTDLEQLYTRVDVSKKKCITDTIKFIKKQKEWAPSPPPAEVKSAKQEEYEKLQKHRSMSFTINKYSEDTPLNMFTYAQIKYCIFTFEFAPTTGTPHIQGFMQFDKQVLLSTLRNTIHANFSARESHGSVEDNIRYMVGGFPVKSKQNEIKPKNRKEMVFCWGTPPEQGKRNDQTQVIEAIQRGDDIDDIFVDNPEYCMKNPKGVQKMHEVQRRVRRISAVKKRFAGMKFLPWQDQLIEIMDGEISDRIVHYIYDPIGHAGKSKMTTYFSVHKKAFSVGPASVRDMAYSLISSGYDGGSSVMIDIARSKDVGTQEYSYKGIMQFCEQVLNGDITVSKYESQQWHGLPSHVFIFSNEPVQLYTEEGKLILSVDRLRYYTINVNMELQSISQSY…	unclassified	und(AlphaNanoSmacolike)|und(AlphaNanoSmacolike)	0.38
KX388530	Cruciviridae sp. isolate CRUV-51-F	LDILFEMAQTDLEQLYTRVDVSKKKCITDTIKFIKKQKEWAPSPPPAEVKSAKQEEYEKLQKHRSMSFTINKYSEDTPLNMFTYAQIKYCIFTFEFAPTTGTPHIQGFMQFDKQVLLSTLRNTIHANFSARESHGSVEDNIRYMVGGFPVKSKQNEIKPKNRKEMVFCWGTPPEQGKRNDQTQVIEAIQRGDDIDDIFVDNPEYCMKNPKGVQKMHEVQRRVRRISAVKKRFAGMKFLPWQDQLIEIMDGEISDRIVHYIYDPIGHAGKSKMTTYFSVHKKAFSVGPASVRDMAYSLISSGYDGGSSVMIDIARSKDVGTQEYSYKGIMQFCEQVLNGDITVSKYESQQWHGLPSHVFIFSNEPVQLYTEEGKLILSVDRLRYYTINVNMELQSISQSY…	unclassified	und(AlphaNanoSmacolike)|und(AlphaNanoSmacolike)	0.38
KP153382	Lake Sarah-associated circular molecule 10 isolat LSaCM-10-LSGA-2013	MTTDKKFTTQNNTKYWCFTWDTNISQKKLPPVADLINFLNNISETAIFQEECGTIKGKVHYQGTLTLIGPRQSKISVLRLFERRFKGVSGLTLSRSYSNQASEDYVTKDEGRISGPYFCGKKEKFSMEYSTTKLTAWQQDLFDFLTKATKIKYFRDRIVIVVQDEKGNSGKSFFLKWLAIGQKVLNSKKLPVTSVDRLMSAVTKVTADSKRIDLFTINLTRSKGEDQSYKDLFAAIEEIKDGYIVDAMYGNYKEAIFDPPIVVIFTNLIIDGKLSESLSPDRWLKLTIDNKKNIVYNGIAWNAYITETPLKDIEPEEFAKNLSTKYLGEK	unclassified	und(AlphaNanoSmacolike)|Smacoviridae(AlphaNanoSmacolike)	0.13
KX388495	Cruciviridae sp. isolate CRUV-16-B	MQKIDAPMSINPVSEVIKKKAGGYSSRNNFAALYLPNCPKFDVDNMRYIICQLERCPKTKRLHWQTYIEFKDKKSGPAIQKSICCGYENGFIANFDMLTADHLTHCEYLNEECPLKVNKERIGSFAALNKDFSDWCKTIHLEYGANRDLCRHYCMKPVILDNGEPCQCNVCNEERNCPTVVVSWVEAGSWKKGGQGSRNDLSAVKETIDAGATRFQIMNSHFSESAKYMRFFDDYRMTRDKELTLKHPGTGLNIWQCKVLDILNNIIDNKIMRKVISIIGPKGGEGKSDFIRYLTDHQQCNMFMNGKNGDLAMIYDPKAKCYAFEITRSNQDTLNYSIIEQIANGIVYSPKYEVQMKCADYDKPNPVLIFSNWVLDFEQLSADRWIVVVLNGTNDEPTI…	unclassified	und(AlphaNanoSmacolike)|und(AlphaNanoSmacolike)	0
KM105952	Chimeric virus 14	MSAPWDNDSEEYSNEEKIDRAPNRKVKIKIAEDPYEEPSEDGIIQDLDEKEEELDNFSKSALRSNGVFKINNRQVMLTYKTHLDKEDYRSFVDELAPFDELFIAHENADLKNPYKHTHAYIKFTIPFVSSDSRVFDWDVSETQNIHPHISVLGAKKVDEIKMKYYISKEDKSPDLAMLRVSCDDWNKANGNKARLGKGLADDQVSLLERVCSYKTYQEMLKHLCKEPGHATGLRELWESKLIAEKPKIKFSEIAEFTWQKTMRDKLLAPEWNHRILTYIVDKKGGSGKSTFADYMVNTYNALYLSSVTSSRDIATLIDEHLKCGGSAKYIILDLPRASKAHKMWDTVEALLNGKLTVGKWKGKPLHFDKPRLIVFANFAPPLPGDESRAADVCEDNCVL…	unclassified	CRESS-Rec2|und(AlphaNanoSmacolike)	0
KJ547624	Sewage-associated circular DNA virus-13	LRDGWGDGGIDVPLIDSDTGERIRVPKSKTEALQEAKEAFHEEEPMPALKETREELKKSVLQEMEDDAWEAALDEETNEALNQVFWEGEDLAGFYPWEETDEVAELKEMDLPRFRLNNQRLLCTYAKSDLSKKKLKEFFVSKSPKTSPKVKIARESHKDGSKHMHVLVDFGKRFDSTNRRVFDFEGRHPNIRRVESMIHWANLLCYLGKEDKKCRPSASVLAAAKCWNAKTPVEAILSGAYKDPIRSLAVFRQRPSAREFICNMTEPEAPWYQDIVKPLIEANSDHRSWYWFCDKVGNSWKSYTCKYLLQTMREDFRATKLTANVDSFAMKLGNWQQEGWSGKILFVDLARGKANTNTIYECLELTSDGWGDTGKYEGKSFILDSSPIVVVLANWWPRI…	unclassified	und|und	0.083
KM573763	Dromedary stool-associated circular ssDNA virus	MTRAWQHCNYFLTSKNHEKFWDTDYLNQLVTKYDIVYLAIGRHTGLTTGYEHVHIDVEFEKKKAWTVIKDIFEDETINVQKRIAERAVADRYLAKEGPERFRVIVNKKPANFQGKRNDITAFDEDMYAGMSWDDLKVAHPSYTGRCRVAYQRYLEHSAAKNKRFRRDPGAQCRVICYFGRSGSGKTWAATGHPAFAKELEGTGEYEEIGVEIAYPGHGTLWWDGVTPSTECLLLDEFSGAWMEFSKFCNMVGQIKGRKFGVKGAFITATINTWIITSIKHPNEWWANAAEFERNRQQLWRRITECYWVDEPNEETGEWGQPILLDKKKFSEMSTETFLNWLKFGRRKYIELYGCEYYYVY	CRESS1	-	0.38
KX388509	Cruciviridae sp. isolate CRUV-30-B	MSYGNTAGRPSLSFILTEFEPRFATEASWQTFPQLFVDSGKVRYICSQLELCPDTLRLHVQTFVKFISKQRYTCIQKISGTKLHCTPVTVEGASAINYGCKEETRIAGPFEFGEKPLPSDRTSKGGSRTKEQWEEVRKVILTGDRQAVPVDLVIKHNLDSRFDKLRSFWTPDQLKNDIPQFIPNTWNKTLEVLDNTQKKRHYWIFSRASNFGKTTFAKKLQSDYVVYIKAGDYTYWDFPRGKLAFLILEDYNEAGVKFHILNLICDGTYEFRIFQGGVRKVDHPFTVIVLSNYPLREIYPHRFDTLYARFNEVELI	unclassified	CRESS1|CRESS-Rec2(circolike)	0
KF133809	Bacillariodnavirus LDMD-2013	MSISSSVLDSLIGTEVKTEDDVSEYSDELTVLSKKDRVRACIVTLFPSDSNQRWLRPETYFTNVAVIANWCGQFEKGGHTEKLHCHIWVEFFNQYPHRFTDLCNLFQIAVGTHPNIRKPIHRLSNKSRKCAVNYVLKPTTRLDVDHAQYIWPFNRQTLSFDQLLWDSKRPKPTKKEDDVEKQRLHIESKPRWWSWDQILHENTASKQLLCLCSWGKKYHEGRHAETARRQIAHVVIMYGAGGTGKTTLAHSWDIIEGEDKQERYYRRNPDDGAFWGGGKTAYKGQRIVHLEEFCGQEQFSRFKEICDLGKEGPPVNIKQGGSQLNHDTVIITSNHHPASWYHKIWESEPKQFHPFWRRITQVWFFPSHRPDGSLNIPDQDNPPFYLDQTEDWVKFQGDF…	Bacilladnaviridae	-	0.33
KY405006	Amphibola crenata associated bacilladnavirus 1	MARSTILTYSPIIFLTLAMSSFMDSLIKRWQGGLSHHCKIMSVASISTMALDRLLDSQDSLVLPTLDGTIPAMVDTSEKEVDHNIDDATELTDYSEESNQRNKLGRCIVTLFPPDSEPKWLDPSTYYTDPASVVKIWVGQFEITPETNQIHAHIYIEFHHKKRPKFNLFVKMFTDVIGKHVNVKSPKKSNNTQRQGAVNYCMKDETRMPDHQPYLWPGNNPAVAFCQKSWDARTTKTSHNRPSREESVEEQRQWIESKPMHWTWDSIVHECEESKVLLATCSWGQKYHAGRHASTPRRTIRDVVIMYGAGGTGKTTLAHKWDVKEDEDFQQRYYRRNPDDGNFWGGGRTAYKGQRIVHFEEFCGQEPFHRIKEVCDIGKEGPSVNIKNSGTDLNHEVVL…	Bacilladnaviridae	-	0.4
KY405007	Amphibola crenata associated bacilladnavirus 2	MLRIIPTIETIKKPTINLTAFQLLSFIMARGTLSTYCLCLKHLCLISARIERLSQNYKRGLSYIMSVFSFNSADFARLLADEDTPPLPSLGGLSSIVEEECSVLTSPTLSDISSKLSDFSNAKPGRNKIRRCMITIFPVDDEMKWLDPYTYFQNPNRTLQIWCGQFEKGGDTGKLHAHIYMEFKNEAGKRFGTLASLFKTKTGCHPNIQIPKKSSIKQRQGAVNYVSKVETRVEGHEPYFWGGNSPKVAFDQKVWEARTAKPTDRTSKKSDEVEEQRLHIESKPMHWTWDQIVHESDESKALLATCSWGTKYHQGRYASTPRRTIQDVVILYGAGGTGKTTLAHKWDEKDGEDFEERYFRRNPDDGNFWGGGRTAYRGQRIVHFEEFCGQEPFHRIKEV…	Bacilladnaviridae	-	0.25
AB971658	Chaetoceros tenuissimus DNA virus type-II	MVFRTMSDNSFDIQQIICDEASIDCSITIDTQPVDDLSASTEYREVSNNTRIGRAILTYFPPTSESKYLEPEFILGRANVHRVSNWFSQYELCPETERKHIHAYVEFKHSVRPFFLTLDTLFKSHDLGWDCRTARKTSKDQRQGAINYVHKLESRMDGFDPYTWPGNEDKDLKFDPSFVRGNRKKDKRKARDDAIEEQRQYIESKPRIWTWDQIVHESEESKKLLVTCSWGKKYHEGRHAEDKRRDVTDVIIYYGAGGTGKTTMCMEHDSTSSLEPRVERYYRRNPDDGNFWGGGRTAYKGQRVIHFEEFGGQEPFSRLKEVCDIGKPGPSVNIKGAGVDLNHHTVIFSSNIHPAGWYRHLWKDDPKQFHPFWRRVTQVKFFPSHRPDGTLNIPDEDTP…	Bacilladnaviridae	-	0.5
AB597949	Chaetoceros tenuissimus DNA virus	MHFRNMSNNSFDIQELICDDASIDCSISINTTPSVDFLETELKEPTNNTLISRAILTYFPPTSDAKYLEPEFMLGQDIRRLSNWWSQYEKCPESGAVHIHAYAEFKRELRPRFNLLDELIRSHVDCWNCRTARKSSESQRQGAINYVHKFETRLDGFQPFTWPKNESNAKFDPSFVRTNSKQNKRKARDDAIEEQRQYIESKPRIWTWDQILHENEASKKLLVTCSWGKKYHEGRHAEDKRRDVTDVIIYYGAGGTGKTTLCMEYNQTSSLEPRVERYYRRNPDDGNFWGGGRTAYKGQRVIHFEEFSGQEPFSRLKEVCDIGKPGPSVNIKGAGVDLNHHTVMFSSNVHPAGWYRNLWRDDPKQFHPFWRRVTKVVFFPSHRPDGSMNIPDEDNPPHM…	Bacilladnaviridae	-	0.4
AB647334	Chaetoceros virus YT-2008	MPKLTRSRSKSCRYNPLSATTRQESMEMDPLQVTHRDLNQWLEVDFPNSSSTTLSTASLGSTQMDLSISKEPSQVSSMSVETTPLPLLPPPSMDMIAETTETESVAYDSDVTLEDGLFVDNSDDTNKLNRFILTFFPTNNEVKWLKPETYFPNAKDLFEIWVGQFEICPTTSRLHAHIYVESVYSRRMRFNTFHRTMRRFHERVQVKNAKRASKKQRQCAINYVMDRRKRQPDSEPFSWTCNKFICAYDKSFERKKKDREGQEVETQRTWIESKPRWWSWDQILHESSESKALLCKCSWGERYHKGRYAEDKARTIREVVILYGAGGTGKTTMAHAWDAQENEDPKERYYRRNPDDGVFWGGGRSAYKGQRIVHYEEFTGQETFSRLKEVCDIGKQGPP…	Bacilladnaviridae	-	0.75
AB844272	Chaetoceros sp. DNA virus 7	MSAPLSIEQDDLLTDDLKSWLSDIDFSNDNEEAIEMEPSDIEMSSPPIDIETSPPEEADVNLDDTWATVQKNGNNKLNRFILTFFPSDMDTKWLEPETYFENSPNKFDCWTGQYEYCPDTGKLHAHIYIECNHKHRIRFNVFHREIRKYHQSVQLQLAKRASKKQRQSAINYVTADFKRAPGSLVFRWEHNKFPSDFDPKCVNKKSKSDKVSKDEQHETQRLWIESKPRHWTWDQIVHENEESKKLLFGCTAGEKYHKGRHAEDARRTINDVIIFYGAGGTGKTTEAQAWGSEDEPVQECRYYRRNPDDGAFWGGGRTCYKGQRIVHYEEFAGQEAFGRLKEVCDIGKHGPAVNVKNGGALLNHDTVIFTSNIHPAGWFHKLWESDPKQWMPFERRITQ…	Bacilladnaviridae	-	0.6
AB193315	Chaetoceros salsugineum DNA virus	MNSSSVSFQGFWFWNIFVIDAKSQFTLNAQILIIMEQCPLEDQITASSSTTPLDSNNRELDEWLDLVMPIEGGSCAEFETPSDISGGGGLDPPEEGVEECIEDDSPPQPHPQIHLAPPVYKQDQLPLGLPLDPDDDHLDDITSCMIGDYRSVTKADLLSRCIVTFFPKDNDRRWLKPETYFGPNPDNFQCWCGQFEICPRTGALHAHIYFECVRSRRLRFVRTAALFRKYHHRVHIKKARTVSKKQRQSAINYVLDDAKRAPGETIFTWHGCKFPVAYDDGCKHGRSKKTITQSKEENTEEQRLWIESKPRSWTWDQIVHESDHSKKLLCTCSWGQKYHAGRRASDPRRTISNVIILYGAGGTGKTTTAHDWDPREGETQKERYYRRNPDDGHFWGAGR…	Bacilladnaviridae	-	0.75
AB553581	Chaetoceros lorenzianus DNA virus	MRQKSINEILCNGLPQQELLPSESVFSDSAESRLLKEWVNDFSDSSPIGLDLGSLDTVPEFDVASSKRASSLTTPGTLNPIQPLSRPLVRSTAVDMTPSETEDELSGTHQDPCSKKDQLLSRFILTFFPETKEDRWMEPDTYFPGAVELFHVWTGQYEECPTTKRLHAHIYVEMLTNRRKRFNAFHKHIRKFHKGVQIRSARRCSVKQRQCAINYVLDDRKRLEGSDTYTWRHSHFEPKYDSKFEKTKEMVKRGEDSETQRVYIESKPRMWTWDQIVHETDESKKLLFNCSWGNKYHAGRVAEVSRRTIQQVIILYGAGGTGKTTTVQSWDARENEDPRERYYRRNPDDGAFWGGGRTAYRGQRIVHYEEFTGQEAFCRLKEVCDIGKHGPPVNVKMGG…	Bacilladnaviridae	-	0.33
KY405008	Avon-Heathcote estuary associated bacilladnavirus	MFLAAIHVITFFISENSKSFYTMSTPTSAFNAMLDDIGIEIQDDISALCSTLADPSDAEPAPPVHDVDDLLASVGPDKRKKIRSGLLTIHPPSSHPSWLKPETWFPQCDDILEIWCAKFEKGEDTGNLHVHIYFKLKHSNTIRFELLQKWITKHVTGFDFKPQRSATKNSTQCVVNYVLKPETSVGDPFIWNASCAFDQKTWDARHKGKGKKQEIIDHIMARDWTLSWASLVHESDESRALLADCGWGKRFQEDRAAAQPRRKIKDVVILYGAAGTGKTTMAMDWDSKPDETTKARYYRRSCDEDFWGGGATAYNGQRVIHYDEFGGQEKFASLKEITSIGLPGPPVKVKGSGRDLNHDTVVFTSNVHPAGWYKGVWAKDPHQFKPFQRRVTKVLFFPR…	Bacilladnaviridae	-	0
AB781284	Thalassionema nitzschioides DNA virus	METNNPSQSNSSITTSPDLFDNLMRDIDDDVPSVIVDPVDPNDFSVCDEYVDEYDPELAFIQQPSGSSGGDNERLSCFMVTLWPDNQDPKWLRPSTYGFLEENLQRWGGQYEKAPLTDTLHAHLLVQFRHPTKMSRKNIRKYFNARLQSKNCNIVPVAYSKANIQRVVNYVLKPDTRIDGTSFALEPSEHIKHMAFDQGVWNQRKPKVPKSEAKWQKQVDWILSKPAHWTWSMIVHESYESQLLLGNCSAGRAFHNDRMSNQPRRNIQECVLLYGAGGTGKTTFARNIGTDDDGPLDHRVYLRNFLEEFWGSGSTAYNGQPWLHLEEFNGQEAFGFLKQIADTSDGAVGPAVKTKGSGTHLNHRGIVITSNYHPATWYRGVWKSDPKQWWPFARRITKV…	Bacilladnaviridae	-	0
KF738878	Dragonfly larvae associated circular virus-5 isolat DflaCV-5_NZ-PG2-LG	MADLLPAQQKKIAPTQKWKDQRGRCWCFTAFVDRPWKDIACKYIVVGHEICPKTGKEHWQGYVEFGTQRRPTGVQKTLGIPDLHVEKRLDTSTPDHAANYCKKDMKFVEYGKISKQGERMDLDLICHDLQTGKRTWREIMGSDDVQTVCKYRMGLQMVAAESAAERAKKPREVTWERKPSMAAAWLDYPDALMVNLNNGACWEAYGGEEEIIVRHAKSYHRELLLDGWITPLNVKCTTKYAAWTKVICVECDPEFFPPVEPVSEVVSEVPPPLGNTIPGVEVPAVKDEEASALP	discarded due to uncoserved helicase domain	-	none
KP153437	Lake Sarah-associated circular virus-21	MDVQQQIKTQSIEMANGITTAFWGMVINNPDDNDFVLIHNGHPDHCRELIHTLEKGENGTIHIQAWLKLQRQQRLSFVKKLFPRANFKPLTSDEYIRNAKSYAQKLDKTAQSPSIHVFQDPMITLESVMRKLVEHVIQETSEKDYMDERCPAQCWDRYKLHGDTIMRSMVVDDFRIAKVFVSDVFKKIWKDYGREVFVSIHNAHTHTHTQREDDENNVAVVDIPTTNADDDTRSGQGSRILEGEHDDGTEQEDSEDYDECETEGSEGSSESGDSQSDEEDD	discarded due to uncoserved helicase domain	-	none
KT945154	Rat stool-associated circular ssDNA virus	MSAADMTTAFWGMVINNYDETDLALVQQGYPDHIRQMVYTLEKGESGTPHIQAYVRLYRQQRLSYVKKLFPRGSFKALLAEEYKLNAQRYAQKLDKTAESSAVITNNPFPDPVQELLAVIRDGFETFHESSDPAKWSKYDKRDVAAWKDSIERVRVEEKPNLAKFYVSPTYTRVWAKFGPSLIRHVVAQVQSERGNSGHTHTHTHTDEKFSRPGCITINAPSSEGSEEGSEACSPGREEEDDEDYDDGSGSETEASTEGDDSGCSESDAESED	discarded due to uncoserved helicase domain	-	none
KM598393	Odonata-associated circular virus-1	MSAEQPKPSDKASHWLLTLNNPTADDRERCKNLPKWVKRFKFQDEIGESGTLHIQGYIHTETVRLSALKKWFPRGHFEVCRNPKAAENYAGKEETSVPGTQHDFKNTVEQVTMMDNLIRLCDIQPKIIDHLIRQNAVSTDAKQVLTGKQLYQEEYWGCVNVILEENPDLISTYTMPQYCKAWVNCRPAILNAHRVRQYENERTAGQPDKNEIITPEDLTTNECLICSKEKCECEA	discarded due to uncoserved helicase domain	-	none
KP153418	Lake Sarah-associated circular virus-15	MDPITDTTIKSTRWAFTAYEGQWHLFETMPPEIAEWGWQTEKCPDTDRLHYQGYLMLQRQQRLASLVRLLPGVHFGAARNWTDLVNYCRKKDTRVEGTEQVHRTNRIPTLFGYAQEVISRLPSWDEIRQDWITKMEHVSWMLKHGQPDLPDPVPRSSIFYVATSMEAHAYDLVTKLVGEDIQKGQIGVEFIVQNPLWITTFKNQIRNMVLRKDFQNPPAFRQTDRQTEITISFE	discarded due to uncoserved helicase domain	-	none
KP153428	Lake Sarah-associated circular virus-18	MTSLLPTDSKSSRWAFTAYEEQWSLFIAMPPGVAEWGWQTETCPKTERLHYQGWLRTNTQVRFSQLRKILPGVHLEKAQHWEALKAYCNKTETALSNTKVIQVSQYKTKFQILEYLISEAIEEYGKDFLMELSPEELTNGIINGGNLMITEGHTYVAWILSDPNFKLTIKQSGKALVLALASKKDRQTDRQN	discarded due to uncoserved helicase domain	-	none
KP153427	Lake Sarah-associated circular virus-18	MTSLLPTDSKSTRWAFTAFESQYTLFNEMPAFIAQWGWQQEVSPTTGKPHFQGYFRTTTQVRFAYLKRQFPGVHLEIAKDWESLKKYCNKAETAIPGTQVQATSNFMNMYDYLPWILLQTIDTYGWQELWDDSREEYIEKVMYTARAHIASGNTWASWIIQNPNFKQNLKENGRAILLGFKHRQTDRQTE	discarded due to uncoserved helicase domain	-	none
KP153413	Lake Sarah-associated circular virus-13	MNSKSIIDNNYKSTRWGFTAFESQWDLFKTIASPVAEWGWQEELCPTSNRLHYQGYIRTQSQVRFSAMKDRFPGVHFLIPDNWSAWLNYCKKSATRNGDGNQVHEVAKNRHMTMADALTALVPYRVTEKEIDDYFTQYKRIYDIKDQYWTAVNRYISETKNYESIGLFTNAQMVVGWAKTKKVWIDRQTDIDRAGLEQAEALQGGTEEPPAEPGNS	discarded due to uncoserved helicase domain	-	none
KP153434	Lake Sarah-associated circular virus-20	MADKSTRWAFTAYETQYPILDALHKQSSELIAEIGWQDEICPKTGKHHRQGYVRTVRQVRFSQLREIMPDIHLEKAKNWEALINYCQKSATRDLSGAMVSAKFERPLRLHEMLIDVAHHIYLSHRPGTKHAVCLDRQTDRQILLSYLREYSAALVSAHPEYAVVLVRQDARDAWCNYIEVWMHKAEQREEGDEVQ	discarded due to uncoserved helicase domain	-	none
KP153441	Lake Sarah-associated circular virus-22	MSERATCWSVTINNPIPADEDNIAQANQRSGWKVEGQLEQGENGTQHYQLMVKTPQIRFSQIKKQFPRAHIEVARNVKALKEYVHKDDTKIGEIPVNDKYPTMTAFWELIYDIHEQLKRDIDYMGIETPEERLVLLDQCVNLLICQTYNVETFGVNPQVRSAAKKYLPALFIRVEKMRRQKTVRQTELNSAVEQNENEESTSETQSTCETQSTCETDESSQSDWND	discarded due to uncoserved helicase domain	-	none
KP153444	Lake Sarah-associated circular virus-24	MTDRATCWSITINNPTEEEVNAWTKIPGWKLTGQYEEGDKTGTPHFQGMLQTPQVRAKAVKRIFPRAHIEIARDRAALAKYVSKEETRVATYEANGVPSLFEYQDNIAALWDVEEFGRRRSDDAYLKRYKYDVGDLALAYVDELVASEIVKGQRGIEFIGINPMWRSSWKKFYSSIITRHASSRTQVQPSSAPSQASPPLSPGGDQLDQEGELCDDHGGSEID	discarded due to uncoserved helicase domain	-	none
KC248414	Daphnia mendotae-associated circovirus clone DVJContig131	MTSTKRSTCWSITINNPTKEEVDAWTSIPGWKLVGQYEEGGKTGTPHFQGMLTTPQVRCSAVKRVFPRAHIEIARDKGALAVYVNKEDTRVATYEATGVPSLFEYHDKIASLWNESEWNRRRLDDLYCKRYKWDFGDMALGYVDDLVALEIEKGQRGIEFIAINPMWRSAWKKFYHSIITRYARSSQVEPPPSPPSPSHDSSSDNEGNSIQSSASLHGDC	discarded due to uncoserved helicase domain	-	none
KM821750	Sewage-associated circular DNA virus-15 isolat SaCV-15_NZ-BS3557-2012	MGDTSQRATCWSITINNPLPSDIPTAEALPAKWVLQGQLEEGKEGTVHYQGMLTTPQCRFSQVKKVLPRAHIEVAKNRTALEKYVHKEDTRLVEVPTVSSSLPTLFDYQFTVAGRWVSTEFDKYIDDFKDKDIGDVALLYVDSLVEKDIINGMRGIEFIAINPMWRSSWKRFWRGIILRHRSIEDAQARQEDIPSQEECTASPCSEAQDGECE	discarded due to uncoserved helicase domain	-	none
KP153399	Lake Sarah-associated circular virus-4	MTQRATCWSITINNPTDEETKVALPVGWKLTGQIEQGEEGTVHYQGMLTTTQQRFGSIKVYFPRAHIEVARNKKALSEYVHKSDTRVAKVDDNISNNIFQWQAEVAKLWNDTDFTHMKYIYDKEPSEDVALKYVDSLCGKLIREGAKGLEFVAVNPMWRSSWKRFYFSIITRDGRDEAVCETQVPQGEETNEKGS	discarded due to uncoserved helicase domain	-	none
Viruses, previously predicted to be recombinant (PMID: 29492276), are shown in orange background				*und, undefined
